# Supplementary material for: Developing a core outcome set for traumatic brachial plexus injuries: a systematic review of outcomes
Source: PubMed Central journal article supplement (PMC8327802; doi:10.1136/bmjopen-2020-044797), 2021-07-30
Supplement: bmjopen-2020-044797.draft_revisions.pdf [file bmjopen-2020-044797.draft_revisions.pdf]

# BMJ Open

BMJ Open is committed to open peer review. As part of this commitment we make the peer review history of every article we publish publicly available.

When an article is published we post the peer reviewers' comments and the authors' responses online. We also post the versions of the paper that were used during peer review. These are the versions that the peer review comments apply to.

The versions of the paper that follow are the versions that were submitted during the peer review process. They are not the versions of record or the final published versions. They should not be cited or distributed as the published version of this manuscript.

BMJ Open is an open access journal and the full, final, typeset and author-corrected version of record of the manuscript is available on our site with no access controls, subscription charges or pay-per-view fees (<http://bmjopen.bmj.com>).

If you have any questions on BMJ Open's open peer review process please email [info.bmjopen@bmj.com](mailto:info.bmjopen@bmj.com)

# BMJ Open

## Developing a core outcome set for traumatic brachial plexus injuries: a systematic review of outcomes.

|                               |                                                                                                                                                                                                                                                                                                                                                                                                                                                                                                                                                          |
|-------------------------------|----------------------------------------------------------------------------------------------------------------------------------------------------------------------------------------------------------------------------------------------------------------------------------------------------------------------------------------------------------------------------------------------------------------------------------------------------------------------------------------------------------------------------------------------------------|
| Journal:                      | <i>BMJ Open</i>                                                                                                                                                                                                                                                                                                                                                                                                                                                                                                                                          |
| Manuscript ID                 | bmjopen-2020-044797                                                                                                                                                                                                                                                                                                                                                                                                                                                                                                                                      |
| Article Type:                 | Original research                                                                                                                                                                                                                                                                                                                                                                                                                                                                                                                                        |
| Date Submitted by the Author: | 13-Sep-2020                                                                                                                                                                                                                                                                                                                                                                                                                                                                                                                                              |
| Complete List of Authors:     | Miller, Caroline; University of East Anglia, School of Health Sciences, The Queens Building ; Queen Elizabeth Hospital Birmingham, Physiotherapy Department<br>cross, jane; University of East anglia, school AHP<br>O'Sullivan, Joel; Queen Elizabeth Hospital Birmingham, Physiotherapy<br>Power, Dominic; Queen Elizabeth Hospital Birmingham, The Birmingham Peripheral Nerve Injury Service<br>Kyte, Derek; University of Birmingham, Institute of Applied Health Research<br>Jerosch-Herold, Christina; University of East Anglia, Health Sciences |
| Keywords:                     | Neurological injury < NEUROLOGY, Limb reconstruction < ORTHOPAEDIC & TRAUMA SURGERY, Plastic & reconstructive surgery < SURGERY                                                                                                                                                                                                                                                                                                                                                                                                                          |
|                               |                                                                                                                                                                                                                                                                                                                                                                                                                                                                                                                                                          |

SCHOLARONE™  
Manuscripts

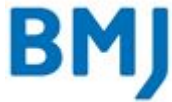

I, the Submitting Author has the right to grant and does grant on behalf of all authors of the Work (as defined in the below author licence), an exclusive licence and/or a non-exclusive licence for contributions from authors who are: i) UK Crown employees; ii) where BMJ has agreed a CC-BY licence shall apply, and/or iii) in accordance with the terms applicable for US Federal Government officers or employees acting as part of their official duties; on a worldwide, perpetual, irrevocable, royalty-free basis to BMJ Publishing Group Ltd ("BMJ") its licensees and where the relevant Journal is co-owned by BMJ to the co-owners of the Journal, to publish the Work in this journal and any other BMJ products and to exploit all rights, as set out in our [licence](#).

The Submitting Author accepts and understands that any supply made under these terms is made by BMJ to the Submitting Author unless you are acting as an employee on behalf of your employer or a postgraduate student of an affiliated institution which is paying any applicable article publishing charge ("APC") for Open Access articles. Where the Submitting Author wishes to make the Work available on an Open Access basis (and intends to pay the relevant APC), the terms of reuse of such Open Access shall be governed by a Creative Commons licence – details of these licences and which [Creative Commons](#) licence will apply to this Work are set out in our licence referred to above.

Other than as permitted in any relevant BMJ Author's Self Archiving Policies, I confirm this Work has not been accepted for publication elsewhere, is not being considered for publication elsewhere and does not duplicate material already published. I confirm all authors consent to publication of this Work and authorise the granting of this licence.

1  
2  
3 **Title Page**  
4  
5  
6  
7

8  
9 **Title of article**  
10

11 **Developing a core outcome set for traumatic brachial plexus injuries: a**  
12  
13 **systematic review of outcomes.**  
14  
15  
16

17  
18  
19  
20  
21 **Corresponding author**  
22

23 Caroline Miller (corresponding author)

24 School of Health Sciences,

25 University of East Anglia,

26 Norwich,

27 UK,

28 NR4 7TJ

29 Tel no: 00447743501508

30 Email: [caroline.miller@uea.ac.uk](mailto:caroline.miller@uea.ac.uk)

31 Twitter handle: @c\_ahern26  
32  
33  
34  
35  
36  
37  
38  
39  
40  
41  
42

43 **Co-authors**  
44

45 **Jane Cross**  
46

47 School of Health Sciences,

48 University of East Anglia,

49 Norwich,

50 UK,

51 Twitter handle: @JaneCross12  
52  
53  
54  
55  
56  
57  
58  
59  
60

**Joel O Sullivan,**

Physiotherapy Department,  
Queen Elizabeth Hospital Birmingham,  
Birmingham  
UK,  
Twitter handle: @jos2305

**Dominic M Power,**

The Birmingham Peripheral Nerve Injury Service,  
Queen Elizabeth Hospital Birmingham,  
Birmingham,  
UK,  
@dominicpower1

**Derek G Kyte,**

Centre for Patient-Reported Outcomes Research,  
University of Birmingham,  
Birmingham,  
UK

**Christina Jerosch-Herold,**

School of Health Sciences,  
University of East Anglia,  
Norwich,  
UK,  
Twitter handle: @tinajerosch

**Word count, 3,300**

## ABSTRACT

**Objective** This review aimed to summarize outcome reporting in traumatic brachial plexus injury research.

**Method** Medline (OVID), EMBASE, CINAHL, and AMED were systematically searched for studies evaluating the clinical effectiveness of interventions in traumatic brachial plexus injuries. Two authors independently screened papers. All outcomes were extracted verbatim from studies. If a patient reported or performance outcome measure was used then outcomes were extracted directly from the instrument. Variation in outcome reporting was determined by assessing the number of unique outcomes reported across all included studies. Outcomes were categorized into domains using a prespecified taxonomy.

**Results** Verbatim outcomes (n= 1460) were extracted from 132 studies including 30 questionnaires. Unique outcomes (n= 157) were structured into four core areas and 11 domains. Outcomes within the musculoskeletal domain were measured in 87% of studies, physical functioning in 23%, emotional functioning in 22% and adverse events in 33%. One study measured quality of life. We identified 62 different methods for measuring muscle strength, 16 for range of movement and 63 studies did not define how they measured movement.

**Conclusion** This review of outcome reporting in traumatic brachial plexus injury research demonstrated an impairment focus and heterogeneity. A core outcome set would ensure standardized and relevant outcomes are reported to facilitate future systematic review and meta-analysis.

1  
2  
3  
4  
5  
6 **Prospero registration number:** CRD42018109843  
7  
8  
9  
10

11 **Strengths and limitations of this study**  
12  
13

- 14 • This study is a comprehensive and systematic review of all reported clinical  
15  
16 outcomes reported in traumatic brachial plexus studies from 2013- 2018 inclusive.  
17  
18
- 19 • Unique outcomes were systematically categorized into a clear taxonomy to inform  
20  
21 the development of a core outcome set.  
22  
23
- 24 • Definition of unique outcomes and categorisation was conducted by researchers and  
25  
26 clinicians to account for multidisciplinary perspectives.  
27  
28
- 29 • Quality assessment was not undertaken as the aim of the study was to review  
30  
31 outcome reporting and not to synthesize data about effectiveness of interventions.  
32  
33  
34  
35  
36  
37  
38  
39  
40  
41  
42  
43  
44  
45  
46  
47  
48  
49  
50  
51  
52  
53  
54  
55  
56  
57  
58  
59  
60

## INTRODUCTION

1  
2  
3  
4  
5  
6  
7  
8  
9  
10 A traumatic brachial plexus injury (TBPI) is a major injury to the brachial plexus. It can result  
11 in significant functional, social, psychological and economic effects,[1, 2] with most  
12 occurring in young men as a result of motorbike accidents,[3]. Survival from major trauma is  
13 increasing,[4] and with this an increase in the incidence of TBPI,[5] which accounts for 1.2%  
14 of polytrauma,[6].The complex and chronic nature of the injury is associated with significant  
15 healthcare costs,[7] in addition to indirect costs estimated at \$2.34 million (in 2017 dollars)  
16 over the lifetime of an individual with a TBPI,[8]. There are multiple strategies for managing  
17 a patient with a TBPI with recent advancements in nerve microsurgery,[9] and robotics,[10]  
18 resulting in increased treatment options. The choice of treatment should be made using up-  
19 to-date, high quality scientific evidence,[11, 12].

20  
21  
22  
23  
24  
25  
26  
27  
28  
29  
30  
31  
32  
33  
34  
35  
36  
37 Ideally, a meta-analysis would identify the most effective treatment for an individual with a  
38 TBPI, however, such analysis requires homogenous outcome measurement and reporting  
39 across studies to enable optimum synthesis. Indeed, despite increasing numbers of TBPI  
40 studies, outcome heterogeneity and poorly defined outcomes has been highlighted as a  
41 significant challenge to evidence synthesis in two recent systematic reviews,[13,14]. There is  
42 now international agreement that the definition of a core outcome set (COS) for TBPI is a  
43 priority,[15, 16]. A COS is a minimum agreed set of outcomes to be reported and measured  
44 in all studies and collected through routine clinical care,[17, 18]. Development of a COS has  
45 been shown to reduce heterogeneity of outcome reporting in other health conditions, with  
46 81% of trialists in rheumatoid arthritis (RA) now measuring the COS for RA,[19].



1  
2  
3  
4  
5  
6 To date a minimum set of outcomes, important to patients and professionals for reporting  
7  
8 in TBPI studies, has not been agreed. The choice of what are important outcomes to  
9  
10 measure in TBPI is complex due to patient heterogeneity with different mechanisms,  
11  
12 locations and severity of injury. As a first step in the development of an international COS  
13  
14 for TBPI we conducted a systematic review to identify outcomes reported in the literature.  
15  
16  
17  
18  
19  
20

21 The aim of this review was to:

- 22  
23 1. Identify what outcome domains are assessed in studies evaluating surgical and non-  
24  
25 surgical treatment for TBPI.  
26  
27
- 28 2. Compare the definitions of outcomes and time points of outcomes assessed.  
29  
30
- 31 3. Identify measurement instruments used to assess outcome domains.  
32  
33  
34  
35  
36  
37  
38  
39  
40  
41  
42  
43  
44  
45  
46  
47  
48  
49  
50  
51  
52  
53  
54  
55  
56  
57  
58  
59  
60

## METHODS

We followed the methods described in the Cochrane Handbook for Systematic Reviews of Interventions,[20] and report in accordance with the Preferred Reporting Items for Systematic Reviews and Meta-Analysis (PRISMA) guidelines,[21] and Core Outcomes Sets Standards for Reporting (COS-STAR) guidelines,[22]. The systematic review protocol was prospectively registered with PROSPERO (PROSPERO registration number: CRD42018109843).

### Identification of studies

We conducted an electronic search of Medline (OVID), EMBASE (OVID), CINAHL and AMED on the 18<sup>th</sup> September 2018. Studies published between 01 Jan 2013 and 18 September 2018 were included to reflect outcomes employed in current TBPI care. An example of the search strategy for Ovid MEDLINE is presented in supplementary file 1. The thesaurus vocabulary of each database was used to adapt search terms. Boolean operators (AND, OR) were used to narrow or widen the search and no language restrictions were applied.

### Study eligibility

Studies were included if they met the following criteria:

*Study type:* Any controlled and uncontrolled experimental and observational studies evaluating interventions in traumatic brachial plexus injury including case reports, case series, case studies, prospective and retrospective cohort studies, randomized and non-randomized clinical trials. We excluded conference proceedings, abstract only publications and those not involving human subjects.

1  
2  
3 *Participants:* Studies reporting outcomes in individuals with traumatic brachial plexus injury  
4  
5 aged 16 years or over. Studies of patients with obstetric brachial plexus injuries were  
6  
7 excluded.  
8  
9

10 *Interventions:* Any surgical or non-surgical intervention for TBPI.  
11  
12

13 *Outcomes:* All outcomes reported in the published abstract, methods or results. These  
14  
15 included physiological and functional outcomes, adverse events and patient reported  
16  
17 outcomes (PROs) either reported in the study or subsequently extrapolated from the PRO  
18  
19 instruments.  
20  
21

22 *Language:* Non-English language publications were included  
23  
24  
25  
26  
27

### 28 **Study selection process**

29  
30 The reference management software Mendeley was used to compile the literature, with  
31  
32 duplicates removed. Authors (X and X) independently screened the titles and then the  
33  
34 abstracts against the eligibility criteria. Disagreements were discussed and a third reviewer  
35  
36 (x) was involved where required. Studies appearing to meet the inclusion criteria based on  
37  
38 title and abstract were retrieved as full text articles, and were read to assess for eligibility  
39  
40 with decisions on inclusion and exclusion recorded (Figure 1. PRISMA flow diagram).  
41  
42  
43 Disagreements in study selection were resolved by discussion within the research team (x, x,  
44  
45  
46  
47 x).  
48  
49  
50  
51  
52  
53  
54  
55  
56  
57  
58  
59  
60

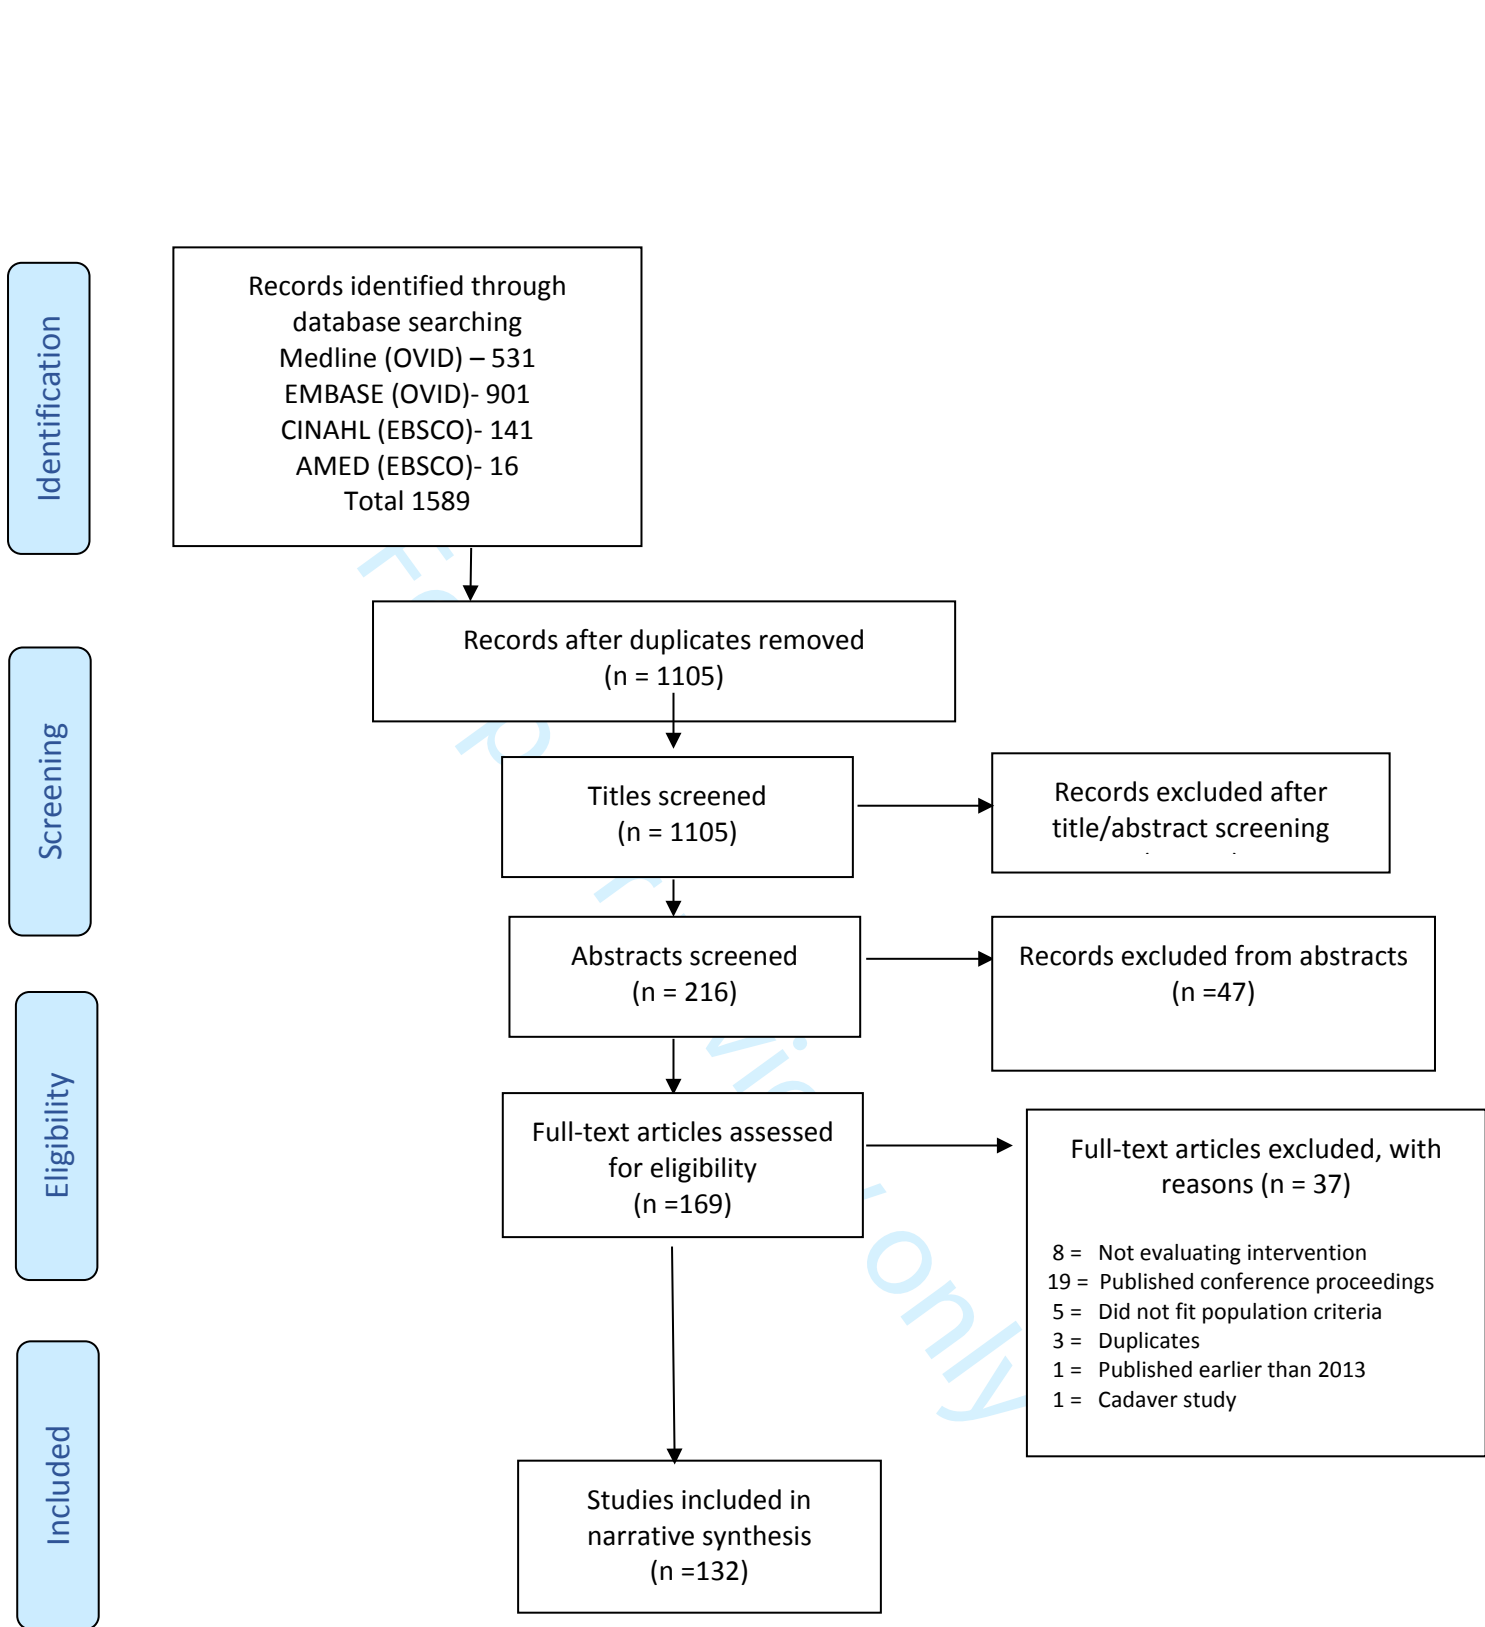

Figure 1. Preferred Reporting Items for Systematic Reviews and meta-analysis flow diagram.

### Quality assessment

Quality assessment of studies was not relevant as the objective was to systematically document all outcomes reported in TBPI studies rather than synthesize the data about intervention effectiveness.

### Data Extraction

Data were extracted into a piloted data extraction sheet (Microsoft Excel). General data extracted from each study included author, study design, recruiting country, publication year, number of participants, gender, mean age, level of TBPI and intervention tested. The following information was extracted regarding outcomes: each outcome reported (verbatim), area of body assessed if relevant (shoulder, elbow, wrist or hand), method of administration, name of measure, timepoints of measure and reported complications. The number of outcomes per study was also documented.

Data extraction was performed independently by X and X for the first 20% of included studies. These were compared, and disagreements discussed and resolved through debate or discussion with a third reviewer (X). Following this a further ten percent of studies had data extracted by both X and X. Due to the high level of agreement between reviewers (91% agreement) on outcomes extracted, at this stage, the remaining studies underwent extraction by a single reviewer (X).

1  
2  
3 If an instrument was used and was composed of multiple items, including patient-reported  
4 questionnaires, the following data was extracted by the first author; verbatim name of the  
5  
6 questionnaires, the following data was extracted by the first author; verbatim name of the  
7  
8 instrument, verbatim name for each item. The frequency of use of instruments was noted  
9  
10 and compared between studies. The instruments were categorized as: (i) General Health  
11  
12 (generic - for use with any patient); (ii) Upper limb physical function (region-specific); (iii)  
13  
14 Symptom or domain specific (to assess a single symptom e.g. pain) and (iv) Condition  
15  
16 Specific. Timepoints of measurement of all outcomes were noted. If the outcome was  
17  
18 assessed at different timepoints then all timings were recorded.  
19  
20  
21  
22  
23  
24

### 25 **Classification of outcomes into domains and defining unique outcomes**

26  
27 Identically worded and spelled verbatim outcomes were removed at this stage. Identical  
28  
29 outcomes measured over different time points were noted as one outcome. Where  
30  
31 outcomes were assessed using an instrument containing several items, each individual item  
32  
33 was assigned an outcome name using the International Classification of Functioning and  
34  
35 following standard linking rules,[23].  
36  
37  
38  
39  
40  
41

42 X categorized all outcomes into an outcome taxonomy developed by COMET for  
43  
44 categorizing outcomes for core outcome set development,[24]. These included 5 core areas  
45  
46 and 38 outcome domains. This is presented in supplementary file 2. A long list of all  
47  
48 categorized outcomes was presented to researchers (X and X) at a face to face meeting  
49  
50 where the categorization of all outcomes was reviewed using the recommended taxonomy.  
51  
52 Subdomains were created within the larger taxonomy to manage the large variation in TBPI  
53  
54 clinical outcomes extracted. Disagreements not resolved at this stage were discussed  
55  
56  
57  
58  
59  
60

1  
2  
3 further with subject experts (for example, the Adverse Event domain was discussed with a  
4  
5 surgeon).

6  
7  
8 Due to the diversity in terminology used to report outcomes, we grouped similar outcomes  
9  
10 within each subdomain. It is recommended that outcomes with different words, phrasing,  
11  
12 or spelling addressing the same concept should be categorized as a unique outcome,[25].

13  
14  
15 For example, active range of motion of shoulder abduction and active goniometry of  
16  
17 shoulder abduction were named as active shoulder abduction range and grasp strength and  
18  
19 grip strength were named as grip strength. Independent meetings were held with four  
20  
21 subject experts to ratify and define unique outcome names within each domain.  
22  
23

#### 24 25 26 **Patient and public involvement**

27  
28  
29 The need for a COS in TBPI care was conceived following discussions with patients and  
30  
31 health professionals. Patients highlighted the diverse effect the injury has on their life and  
32  
33 that often these outcomes were overlooked by professionals, such as body image. There is a  
34  
35 patient advisory group for the COS and the systematic review was discussed at these  
36  
37 meetings. Patients were not actively involved in data collection or analysis of this review.  
38  
39  
40 Dissemination will occur at the annual traumatic brachial plexus charity UK meeting where  
41  
42 updates from the project are presented yearly and through a six monthly newsletter.  
43  
44  
45  
46  
47  
48  
49  
50  
51  
52  
53  
54  
55  
56  
57  
58  
59  
60

## Results

### Included studies

The search identified 1159 studies, after removing duplicates 1105 studies remained. Titles and abstract review identified 169 potentially relevant articles. Of these, 37 studies did not meet the inclusion criteria and were excluded (PRISMA flow diagram; figure 1) thus, 132 studies formed the basis of this review. All included articles are presented in supplementary file 3.

### Study characteristics

Thirty-two countries from six continents recruited 3201 participants into the 132 studies (Table 1). Of the 132 studies, 87 (66%) were retrospective case series with most studies published from Asia (n=61, 46%). The most frequently studied surgical intervention was nerve transfers (n=66, 57%).



Table 1. Characteristics and demographics of included studies

|                                 | Study number (%) |
|---------------------------------|------------------|
| Number of retrospective studies | 87/132(66)       |
| Number of prospective studies   | 21/132 (16)      |
| Number of case studies          | 23/132(17)       |
| Randomized controlled trial     | 1/132 (0.8)      |
| <b>World region recruitment</b> |                  |
| Asia                            | 61/132(46)       |
| North America                   | 20/132(15)       |
| South America                   | 20/132(15)       |
| Europe                          | 27/132(20)       |
| Africa                          | 3/132(2.2)       |
| Australasia                     | 1/132(0.8)       |
| <b>Year published</b>           |                  |
| 2013                            | 25/132 (19)      |
| 2014                            | 24/132(18)       |
| 2015                            | 15/132(11)       |
| 2016                            | 30/132(23)       |
| 2017                            | 27/132(20)       |
| 2018                            | 11/132(8.3)      |
| <b>Gender (total 3201)</b>      |                  |
| Male                            | 2622/3201(82)    |
| Female                          | 323/3201(10)     |
| Not stated                      | 256/3201(7.9)    |

**Site of plexus injury per study (n=132)**

|                          |             |
|--------------------------|-------------|
| Upper trunk              | 26/132(20)  |
| Lower trunk              | 10/132(7.6) |
| Pan plexus (all avulsed) | 50/132(38)  |
| Infraclavicular          | 7/132(5.3)  |
| Mixture                  | 32/132(24)  |
| Unclear                  | 7/132(5.3)  |

**Interventions (n=132)**

|                 |              |
|-----------------|--------------|
| Surgical        | 115/132(87)  |
| Electrotherapy  | 2/132(1.5)   |
| Pain treatments | 11/132 (8.3) |
| Rehabilitation  | 2/132(1.5)   |
| Orthotic        | 1/132(0.7)   |
| Stem cell       | 1/132(0.7)   |

**Types of surgical intervention (n=115)**

|                    |            |
|--------------------|------------|
| Neurotisation      | 66/115(57) |
| Tendon transfer    | 7/115(6.1) |
| Free flap          | 16/115(14) |
| Multiple surgeries | 12/115(10) |
| Contralateral C7   | 8/115(6.9) |
| Other              | 6/115(5.2) |

---

## Outcomes

A total of 1460 verbatim outcomes were reported, after removing duplicates 157 different unique outcomes remained. No single outcome was reported across all 132 studies.

*Outcome definition variation.* Many outcomes were not clearly defined and different terms were frequently found for the same concept. For example, shoulder abduction strength was described in eleven different ways including 'deltoid strength', 'motor function of axillary nerve', 'motor recovery of shoulder abductors', 'muscle power supraspinatus', 'motor function of Deltoid', 'motor function of Supraspinatus'.

*Outcome timing variation:* Of the 1460 verbatim outcomes, 46% (672) were measured between one and three years following intervention. For 83 outcomes the timing of the measurement was not stated. See Figure 2.

Place Figure 2 here

Figure 2. Timepoints of reported outcomes

1  
2  
3  
4  
5  
6  
7  
8  
9  
10  
11  
12  
13 *Outcome domains:* The 157 different types of outcomes were categorized into four core  
14 areas (Physiological and Clinical, Life Impact, Resource Use, Adverse Events/Complications)  
15 and 11 domains according to the COMET recommendations,[24]. See supplementary file 4.  
16  
17 The core area Physiological/Clinical included three domains: musculoskeletal and connective  
18 tissue outcomes, nervous system outcomes and general/symptom outcomes. The core area  
19 Life Impact included seven domains: physical functioning, social functioning, role  
20 functioning, emotional functioning, global quality of life, perceived health status and  
21 delivery of care. The core area Resource Use included one domain: hospital resources. The  
22 core area Adverse Events included one domain: adverse events. No outcome could be  
23 placed into the core area Death.  
24  
25  
26  
27  
28  
29  
30  
31  
32  
33  
34  
35  
36  
37  
38  
39

40 Tables 2 to 4 summarise the number of unique outcomes within each domain and the  
41 number of studies reporting these outcomes in each core area. The most frequently  
42 reported domains were all in the Physiological/ Clinical core area and included  
43 musculoskeletal and connective tissue (87%), nervous system (35%) and symptoms (36%).  
44  
45  
46  
47  
48  
49  
50 Forty-four studies (33%) reported complications/ adverse events.  
51  
52  
53  
54  
55  
56  
57  
58  
59  
60

Table 2. Physiological /Clinical Core Area

| <b>Outcome Domains</b>                | <b>Number of unique outcomes reported within domain</b> | <b>Examples of unique outcomes</b>                                                                               | <b>Number of studies reporting outcomes in domain (%)</b> |
|---------------------------------------|---------------------------------------------------------|------------------------------------------------------------------------------------------------------------------|-----------------------------------------------------------|
| Musculoskeletal and connective tissue | 18                                                      | Active range of movement, muscle strength, muscle fatigue                                                        | 115/132 (87%)                                             |
| Nervous system                        | 15                                                      | Progression of nerve regeneration, ability to feel light touch, ability to feel pain                             | 46/132 (35%)                                              |
| General/ symptoms                     | 23                                                      | Pain intensity/relief, pain duration, pain quality, pain when arm exposed to cold, stiffness, sleep, paresthesia | 47/132 (36%)                                              |

Table 3. Life Impact Core Area

| <b>Outcome Domains</b>  | <b>Number of unique outcomes reported within domain</b> | <b>Examples of unique outcomes</b>                                         | <b>Number of studies reporting outcomes within domain (%)</b> |
|-------------------------|---------------------------------------------------------|----------------------------------------------------------------------------|---------------------------------------------------------------|
| Physical functioning    | 19                                                      | Reaching, fine hand movement                                               | 30/132 (23%)                                                  |
| Role functioning        | 23                                                      | Return to work, Impact on normal hobbies                                   | 33/132 (25%)                                                  |
| Social functioning      | 7                                                       | Social activities with family                                              | 30/132 (23%)                                                  |
| Emotional functioning   | 13                                                      | Body image, acceptance                                                     | 29/132 (22%)                                                  |
| Global quality of life  | 1                                                       | Quality of life                                                            | 1/132 (0.8%)                                                  |
| Perceived health Status | 1                                                       | Health status rating                                                       | 6/132 (4.5%)                                                  |
| Delivery of care        | 13                                                      | Patient satisfaction, quality of care, patient preference, time to surgery | 11/132(8.3%)                                                  |

Table 4. Adverse Events and Resource Use Core Areas

| <b>Outcome Domains</b>              | <b>Number of unique outcomes reported within domain</b> | <b>Examples of unique outcomes</b> | <b>Number of studies reporting outcomes within domain</b> |
|-------------------------------------|---------------------------------------------------------|------------------------------------|-----------------------------------------------------------|
| <b>Adverse Events Core Area</b>     |                                                         |                                    |                                                           |
| Donor site morbidity                | 3                                                       | Motor weakness, sensory loss       | 24/132(18%)                                               |
| Musculoskeletal                     | 7                                                       | Co -contraction, Passive movement  | 12/132 (9%)                                               |
| Respiratory                         | 4                                                       | Pneumothorax                       | 6/132 (4.5%)                                              |
| Vascular                            | 7                                                       | Hematoma                           | 7/132 (5.3%)                                              |
| Infection                           | 1                                                       | Infection                          | 3/132 (2.3%)                                              |
| General non specified complications | 1                                                       | General complications              | 2/132 (1.5%)                                              |
| <b>Resource Use Core Area</b>       |                                                         |                                    |                                                           |
| Hospital resource use               | 1                                                       | Operation time                     | 1/132 (.75%)                                              |

## Outcome Measurement

Outcomes were extracted from 30 different instruments; PRO measures (n= 20), combined clinician-reported and patient-reported measures (n= 3) and performance measures (n= 7). See table 5. These measures were reported 83 times in the included publications. Most outcome measures were used once (n= 25, 30%). The most frequently reported measures were the Disabilities of the Arm Shoulder and Hand (DASH,[26]) questionnaire (n=27 studies, 32%) and the Visual Analogue Scale (n=18, 22%). The median number of items per instrument was 15 ranging from one (Visual Analogue Scale, Numerical Rating Scale and Wong Baker Faces rating scale),[27] to 54,[28]. These items mapped to 34 different outcome domains.

There was wide variation in the methods used to measure outcomes. This is presented in supplementary file 5 (Measurement instruments mapped to domains). For example; 62 different measurements were used to evaluate muscle function, including the British Medical Research Council,[29] eleven different modifications of the British Medical Council, Isokinetics, Dynanometry and Constant - Murley score,[30]. In addition, it was often not clear which instrument was used for measurement of the outcomes. For example, the instrument used to measure active range of movement was not reported in 36% of total times (63/ 174) the outcome was assessed. Finally with regards to method of measurement 55 studies employed a PRO instrument to evaluate the intervention.



Table 5: Outcome measures used in included studies

|                                   |                                                                                       | Number of items | Number of scales | Frequency (n=83) |
|-----------------------------------|---------------------------------------------------------------------------------------|-----------------|------------------|------------------|
| Patient Reported Outcome Measures | <b>Upper limb physical function measures (n= 16)</b>                                  |                 |                  |                  |
|                                   | Disabilities of Arm Shoulder and Hand                                                 | 38              | 3                | 27               |
|                                   | Upper Extremity Functional Index                                                      | 20              | 0                | 2                |
|                                   | American Shoulder and Elbow Score                                                     | 15              | 0                | 1                |
|                                   | Modified American Shoulder and Elbow Score                                            | 13              | 0                | 1                |
|                                   | Simple Shoulder test                                                                  | 12              | 0                | 1                |
|                                   | Michigan Hand Questionnaire                                                           | 37              | 0                | 1                |
| PRO & ClinRO Measure              | University of California Los Angelus shoulder score                                   | 5               | 0                | 1                |
|                                   | Constant- Murley                                                                      | 5               | 0                | 1                |
|                                   | MAYO Performance Index                                                                | 4               | 0                | 1                |
| Performance Measures              | Jebesen Taylor                                                                        | 7               | 0                | 1                |
|                                   | University of New Brunswick Test of Prosthetic Function for Unilateral Amputees (UNB) | 30              | 3                | 1                |
|                                   | Upper Limb Module Questionnaire                                                       | 22              | 3                | 1                |
|                                   | Action Reach Arm Test                                                                 | 19              | 4                | 1                |
|                                   | Southampton Hand Assessment Procedure                                                 | 26              | 0                | 1                |
|                                   | Purdue Peg test                                                                       | 3               | 0                | 1                |
|                                   | Activities Measure for Upper Limb Amputees                                            | 24              | 0                | 1                |
| Patient Reported Outcome Measures | <b>Generic questionnaires (n=2)</b>                                                   |                 |                  |                  |
|                                   | 36 item short form survey (SF36)                                                      | 36              | 8                | 5                |
|                                   | Patient Specific Functional Score                                                     | 4               | 0                | 1                |
|                                   | <b>Condition specific questionnaires (n=1)</b>                                        |                 |                  |                  |

|    |                                               |    |   |    |
|----|-----------------------------------------------|----|---|----|
| 1  |                                               |    |   |    |
| 2  |                                               |    |   |    |
| 3  |                                               |    |   |    |
| 4  | Trinity Amputation and Prosthesis scale       | 54 | 5 | 1  |
| 5  |                                               |    |   |    |
| 6  | <b>Symptom specific questionnaires (n=10)</b> |    |   |    |
| 7  |                                               |    |   |    |
| 8  | Visual Analogue Scale                         | 1  | 0 | 18 |
| 9  |                                               |    |   |    |
| 10 | Numerical Rating Scale                        | 1  | 0 | 6  |
| 11 |                                               |    |   |    |
| 12 | Wong Baker Faces rating scale                 | 1  | 0 | 1  |
| 13 |                                               |    |   |    |
| 14 | Brief pain inventory                          | 15 | 6 | 1  |
| 15 |                                               |    |   |    |
| 16 | Neuropathic pain symptom inventory            | 10 | 5 | 1  |
| 17 |                                               |    |   |    |
| 18 | University of Washington Neuropathic score    | 10 | 3 | 1  |
| 19 |                                               |    |   |    |
| 20 | McGill Pain Questionnaire                     | 28 | 3 | 1  |
| 21 |                                               |    |   |    |
| 22 | McGill Pain Questionnaire SF                  | 17 | 3 | 1  |
| 23 |                                               |    |   |    |
| 24 | McGill Pain Questionnaire (Japanese version)  | 17 | 3 | 1  |
| 25 |                                               |    |   |    |
| 26 | Self- rating anxiety scale                    | 20 | 0 | 1  |
| 27 |                                               |    |   |    |
| 28 | Zung Self rating Depression scale             | 20 | 0 | 1  |
| 29 |                                               |    |   |    |
| 30 |                                               |    |   |    |
| 31 |                                               |    |   |    |
| 32 |                                               |    |   |    |
| 33 |                                               |    |   |    |
| 34 |                                               |    |   |    |
| 35 |                                               |    |   |    |
| 36 |                                               |    |   |    |
| 37 |                                               |    |   |    |
| 38 |                                               |    |   |    |
| 39 |                                               |    |   |    |
| 40 |                                               |    |   |    |
| 41 |                                               |    |   |    |
| 42 |                                               |    |   |    |
| 43 |                                               |    |   |    |
| 44 |                                               |    |   |    |
| 45 |                                               |    |   |    |
| 46 |                                               |    |   |    |
| 47 |                                               |    |   |    |
| 48 |                                               |    |   |    |
| 49 |                                               |    |   |    |
| 50 |                                               |    |   |    |
| 51 |                                               |    |   |    |
| 52 |                                               |    |   |    |
| 53 |                                               |    |   |    |
| 54 |                                               |    |   |    |
| 55 |                                               |    |   |    |
| 56 |                                               |    |   |    |
| 57 |                                               |    |   |    |
| 58 |                                               |    |   |    |
| 59 |                                               |    |   |    |
| 60 |                                               |    |   |    |

## DISCUSSION

This systematic review aimed to identify what outcome domains have been reported in studies evaluating interventions for TBPI, examine outcome definitions and timepoints and identify the instruments used to assess outcomes. We found a wide variation in reported outcomes, timing of outcomes and outcome instruments used. Furthermore, a lack of standardized definition for commonly reported outcomes was observed. This heterogeneity in outcome reporting across studies hinders evidence synthesis and results in research waste,[31].

The most commonly reported core area was Physiological/ Clinical including musculoskeletal, nervous system and symptom domains. Eighty-seven percent of studies reported musculoskeletal outcomes. However, there were 21 different outcomes reported in this category making comparison between studies difficult. Furthermore, the diversity of measures used to assess the outcomes increases the difficulty with synthesis. For example, muscle function/ strength was assessed using 59 different measures, whilst 10 studies did not report what measure they used. To compound this muscle strength was assessed by both physical examination by a clinician (86%) and also by asking the patient(10%).

1  
2  
3  
4  
5  
6  
7  
8  
9  
10 Only 42% of studies (55/132) evaluated PROs and within these studies there was significant  
11 heterogeneity in the measurement instrument used. Twenty-three different instruments  
12 were used with 18 only ever used once. The DASH was the most common instrument  
13 employed, in just over half the studies evaluating a PRO. The PRO instruments also varied  
14 greatly in terms of content with some as simple as a single item whilst others included up to  
15 54 items. Over 273 individual questionnaire items were evident from the 23 PRO  
16 instruments mapping to 34 different outcomes domains. This highlighted a lack of  
17 consistency with no domain being measured by all PRO instruments. None of the included  
18 PRO assessments were designed specifically for individuals with a TBPI. Although this may  
19 be beneficial in terms of comparison with other conditions, such instruments may not be  
20 sensitive to issues of importance to patients with TBPI. These issues combined pose major  
21 questions regarding the clinical interpretation of results from TBPI studies.  
22  
23  
24  
25  
26  
27  
28  
29  
30  
31  
32  
33  
34  
35  
36  
37  
38  
39  
40  
41  
42  
43  
44

45 It is clear that that individuals with a TBPI suffer significant emotional and psychosocial  
46 issues,[1, 32]. However such issues were infrequently and inconsistently measured within  
47 this review. Only one study considered Quality of Life (QoL) as an outcome,[33] using a  
48 single item PRO. Similarly, physical, role and social functioning outcomes were reported in  
49 23%, 25% and 23% of studies respectively. This relates strongly to the use of the DASH  
50 within the studies. Indeed, emotional functioning was reported in 29 studies, 27 of these  
51 studies used the DASH which has one item on confidence and capability mapping to this  
52  
53  
54  
55  
56  
57  
58  
59  
60

1  
2  
3 domain. If the DASH was excluded, only seven studies would assess outcomes within the  
4  
5 emotional functioning domain. This is surprising considering the existing literature which  
6  
7 evidences the complex emotional and psychological factors, individuals face when adjusting  
8  
9 to their injury,[1, 34].  
10  
11  
12  
13  
14

15 Complications/adverse events were reported in 33% of studies. Documentation of  
16  
17 complications is crucial to improve patient care and gather data for benchmarking. In 1992,  
18  
19 the Clavien-Dindo classification,[35] was introduced to assist with classification of  
20  
21 complications to enable comparison between studies,[36]. However, within the adverse  
22  
23 events outcomes identified in this review there was heterogeneity. Of the 37 verbatim  
24  
25 outcomes reported within the donor morbidity (motor) outcome 19 did not define how this  
26  
27 was assessed.  
28  
29  
30  
31  
32  
33  
34

35 There are some limitations. We excluded outcomes from older studies to ensure we  
36  
37 identified outcomes relevant to contemporary TBPI care. Formal quality assessment of  
38  
39 studies was not undertaken, however the review was designed to identify the breadth of  
40  
41 reporting in the literature and not to examine the effectiveness of interventions. The  
42  
43 strengths of this review are that the protocol and the data extraction form were  
44  
45 prespecified, prospectively registered and the literature search systematic. To account for  
46  
47 multidisciplinary perspectives, researchers and clinicians were involved in categorizing  
48  
49 outcomes into domains. It is the first review to detail the scale of outcome heterogeneity in  
50  
51 TBPI research using a systematic method. International and non-English publications were  
52  
53 included to reduce the risk of selection bias.  
54  
55  
56  
57  
58  
59  
60

1  
2  
3  
4  
5  
6  
7  
8 Variation in definitions and measurement of outcomes has been found within other areas of  
9  
10 healthcare. Outcome heterogeneity is found in the reporting of outcomes relating to burn  
11  
12 care,[37] breast reconstruction,[38] and spinal cord injury,[39] amongst others. A recent  
13  
14 review of outcome reporting within burns illustrated wound healing was defined in 166  
15  
16 different ways across 147 studies,[37]. A solution to the variation in outcome reporting  
17  
18 across studies in TBPI is the development of a COS,[40]. This has been shown to improve  
19  
20 consistency of outcome reporting,[41, 19]. Development of a COS in TBPI would not restrict  
21  
22 the range of outcomes that can be measured. Researchers and clinicians would still be free  
23  
24 to select additional outcomes but the inclusion of such a COS would facilitate synthesis of  
25  
26 evidence,[42, 43]. Whilst work has begun in obstetric brachial plexus injuries to develop a  
27  
28 minimum data set,[44] there is no COS for TBPI.  
29  
30  
31  
32  
33  
34  
35  
36  
37  
38  
39  
40  
41  
42  
43  
44  
45  
46  
47  
48  
49  
50  
51  
52  
53  
54  
55  
56  
57  
58  
59  
60

Considerable work has been done by the Core Outcome Measures in Effectiveness Trials (COMET) initiative through dissemination of resources for COS development and support for methodological development. COMET recommends a five step process to develop a COS: define the scope, assess the need, develop the protocol, determine what to measure and determine how to measure,[45]. This systematic review addresses these first two steps for the development of the COS in TBPI care. This review has shown the majority of TBPI studies use only clinician reported outcomes to evaluate interventions. However they do not adequately capture patients' health related quality of life,[46] and may underestimate the impact of a condition,[47]. Concurrent qualitative work to identify outcomes which are important to individuals with a TBPI has been completed by this group. The next stage

1  
2  
3 involves integration of all potential outcomes from this review and the qualitative work into  
4  
5 a long list of domains. Healthcare professionals and patients will then prioritize these using  
6  
7 a consensus process,[45]. This will strengthen the case for uptake of a COS for TBPI as it  
8  
9 represents patients' and clinicians' perspectives on what outcomes are important.  
10  
11  
12  
13  
14  
15  
16  
17  
18  
19  
20  
21  
22  
23  
24  
25  
26  
27  
28  
29  
30  
31  
32  
33  
34  
35  
36  
37  
38  
39  
40  
41  
42  
43  
44  
45  
46  
47  
48  
49  
50  
51  
52  
53  
54  
55  
56  
57  
58  
59  
60

For peer review only

## CONCLUSION

This systematic review has shown that outcome reporting in TBPI care is heterogenous and impairment focused with a lack of standardized definitions for commonly reported outcomes. This makes it difficult to compare and combine data from studies to inform decision making in clinical practice. We have identified a list of potentially relevant outcomes and categorized these into a clear taxonomy. This will inform the next stage of developing a COS for TBPI where patients, surgeons and therapists will be involved in a consensus process to decide the final outcomes included in a COS for TBPI.

## Acknowledgements

We would like to thank Colin Shirley for his assistance and guidance categorising neurophysiological outcomes

## Competing Interests

Conflicting interests: CM, CJH, JC, DMP and JOS declare no potential conflicts of interest with respect to the research, authorship and publication of this article. DGK reports grants from NIHR, grants from Innovate UK, grants from NIHR Birmingham Biomedical Research Centre, grants from NIHR SRMRC at the University of Birmingham and University Hospitals Birmingham NHS Foundation Trust, personal fees from Merck, personal fees from GSK,



1  
2  
3 grants from Macmillan Cancer Support, grants from Kidney research UK, outside the  
4  
5 submitted work; .  
6  
7  
8  
9

## 10 11 **Funding**

12  
13  
14 The work was supported by the National Institute of Health Research [grant number ICA-  
15  
16 CDRF-2017-03-039]  
17  
18  
19  
20  
21  
22  
23

## 24 25 **Ethical approval**

26  
27  
28 Ethical approval was not sought for the present study because it was a systematic review  
29  
30 and did not involve human participation  
31  
32  
33  
34  
35

## 36 37 **Informed consent**

38  
39  
40 Informed consent was not sought for the present study because it was a systematic review  
41  
42 and did not involve human participation  
43  
44  
45  
46  
47  
48  
49  
50  
51  
52  
53  
54  
55  
56  
57  
58  
59  
60

## Contributorship

CM, CJH and JC conceived and designed the review. CM and JOS reviewed the titles, abstracts and full text papers for eligibility. Authors resolved disagreements by discussion or where necessary CJH and DMP offered their view. CM and JOS were responsible for extracting data and data extraction was verified by CJH. CM, CJH and JC categorised outcomes. Categorisation was reviewed and edited by DMP and DK. CM prepared the manuscript. CJH,JC, DMP, DK and JOS reviewed and edited the manuscript.

## REFERENCES

- 1 Brito S, White J, Thomacos N, et al. The lived experience following free functioning muscle transfer for management of pan-brachial plexus injury: reflections from a long-term follow-up study. *Disabil Rehabil* 2019;1:1-9.
- 2 Morris MT, Daluiski A, Dy CJ. A Thematic Analysis of Online Discussion Boards for Brachial Plexus Injury. *J Hand Surg Am* 2016;41:813-818.
- 3 Kaiser R, Waldauf P, Ullas G, et al. Epidemiology, etiology, and types of severe adult brachial plexus injuries requiring surgical repair: systematic review and meta-analysis. *Neurosurg Rev* 2020;43:443-452.
- 4 Moran CG, Lecky F, Bouamra O, et al. Changing the System - Major Trauma Patients and Their Outcomes in the NHS (England) 2008-17. *EClinicalMedicine* 2018;2-3:13-21.
- 5 Dy, C.J, Peacock, K, Olsen, MA, et al. Incidence of Surgically Treated Brachial Plexus Injury in Privately Insured Adults Under 65 Years of Age in the USA. *HSS Jnl* 2020. Jan. <https://doi.org/10.1007/s11420-019-09741-8> (accessed 12 September 2020).
- 6 Midha R. Epidemiology of brachial plexus injuries in a multitrauma population. *Neurosurgery*. 1997;40:1182-1189.
- 7 Felici N, Zaami S, Ciancolini G, et al. Cost analysis of brachial plexus injuries: variability of compensation by insurance companies before and after surgery. *Handchir Mikrochir Plast Chir*. 2014;46:85-89.
- 8 Hong TS, Tian A, Sachar R, et al. Indirect Cost of Traumatic Brachial Plexus Injuries in

- 1  
2  
3 the United States. *J Bone Joint Surg Am*. 2019;101:e80.  
4  
5  
6 9 Bhandari PS, Maurya S. Recent advances in the management of brachial plexus  
7  
8 injuries. *Indian J Plast Surg*. 2014;47:191-198.  
9  
10  
11 10 Kubota, S, Hara Y, Shimizu Y, et al. (2017) A newly developed upper limb single-joint  
12  
13 HAL in a patient with elbow flexion reconstruction after traumatic brachial plexus  
14  
15 injury: A case report. *Interdisciplinary Neurosurgery*. 2017;10:66-68.  
16  
17  
18 11 Dickinson HD. Evidence-based decision-making: an argumentative approach. *Int J*  
19  
20 *Med Inform*. 1998;51:71-81.  
21  
22  
23 12 Sackett DL, Rosenberg WM, Gray JA, et al. Evidence based medicine: what it is and  
24  
25 what it isn't. *BMJ*. 1996;312:71-72.  
26  
27  
28 13 Ayhan E, Soldado F, Fontecha CG, et al. Elbow flexion reconstruction with nerve  
29  
30 transfer or grafting in patients with brachial plexus injuries: A systematic review and  
31  
32 comparison study. *Microsurgery*. 2020;40:79-86.  
33  
34  
35 14 Donnelly MR, Rezzadeh KT, Vieira D, et al. Is one nerve transfer enough? A  
36  
37 systematic review and pooled analysis comparing ulnar fascicular nerve transfer and  
38  
39 double ulnar and median fascicular nerve transfer for restoration of elbow flexion  
40  
41 after traumatic brachial plexus injury. *Microsurgery*. 2020;40:361-369.  
42  
43  
44 15 Dy CJ, Garg R, Lee SK, et al. A systematic review of outcomes reporting for brachial  
45  
46 plexus reconstruction. *J Hand Surg Am*. 2015;40:308-313.  
47  
48  
49 16 Hill B, Williams G, Olver J, et al. Letter Regarding Outcome Reporting for Brachial  
50  
51 Plexus Reconstruction. *J Hand Surg Am*. 2015;40:1504.  
52  
53  
54 17 Gargon E, Gurung B, Medley N, et al. Choosing Important Health Outcomes For  
55  
56 Comparative Effectiveness Research: A Systematic Review. *Value Health*.  
57  
58 2014;17:A435.  
59  
60

- 1  
2  
3 18 Williamson P, Altman D, Blazeby J, Clarke M, Gargon E. Driving up the quality and  
4  
5 relevance of research through the use of agreed core outcomes. *J Health Serv Res*  
6  
7 *Policy*. 2012;17:1-2.  
8  
9  
10  
11 19  
12  
13 20 Kirkham JJ, Bracken M, Hind L, et al. Industry funding was associated with increased  
14  
15 use of core outcome sets. *J Clin Epidemiol*. 2019;115:90-97.  
16  
17  
18 21 Higgins JPT, Green S. *Cochrane Handbook for Systematic Reviews of Interventions*. 5<sup>th</sup>  
19  
20 Edn. The Cochrane Collaboration 2011. Available from [www.handbook.cochrane.org](http://www.handbook.cochrane.org).  
21  
22  
23 22 Shamseer L, Moher D, Clarke M, et al. Preferred reporting items for systematic  
24  
25 review and meta-analysis protocols (PRISMA-P) 2015: elaboration and explanation.  
26  
27 *BMJ*. 2015;350:7647.  
28  
29  
30 23 Kirkham JJ, Gorst S, Altman DG, et al. Core Outcome Set-STAndards for Reporting:  
31  
32 The COS-STAR Statement. *PLoS Med*. 2016;13: e1002148.  
33  
34  
35 24 Cieza A, Geyh S, Chatterji S, et al. ICF linking rules: an update based on lessons  
36  
37 learned. *J Rehabil Med*. 2005;37:212-218.  
38  
39  
40 25 Dodd S, Clarke M, Becker L et al. A taxonomy has been developed for outcomes in  
41  
42 medical research to help improve knowledge discovery. *J Clin Epidemiol*. 2018;96:  
43  
44 84-92.  
45  
46  
47 26 Young AE, Brookes ST, Avery KNL et al. A systematic review of core outcome set  
48  
49 development studies demonstrates difficulties in defining unique outcomes. *J Clin*  
50  
51 *Epidemiol*. 2019a;115:14-24.  
52  
53  
54 27 Hudak PL, Amadio PC, Bombardier C. Development of an upper extremity outcome  
55  
56 measure: the DASH (disabilities of the arm, shoulder and hand). *Am J Ind Med*. 1996;  
57  
58 29:602-608.  
59  
60

- 1  
2  
3 28 Baker CM, Wong DL. Q.U.E.S.T.: a process of pain assessment in children (continuing  
4 education credit). *Orthop Nurs*. 1987; 6:11-21.  
5  
6  
7  
8 29 Gallagher P, MacLachlan M. Development and psychometric evaluation of the trinity  
9 amputation and prosthesis experience scales (TAPES). *Rehab Psychology*.  
10 2000;45:130–154.  
11  
12  
13  
14  
15 30 Committee Medical. Medical Research Council [Great Britain]. Nerve Injuries  
16 Committee. Aids to the investigation of the peripheral nervous system. HM  
17 Stationary Office, 1942.  
18  
19  
20  
21  
22  
23 31 Conboy VB, Morris RW, Kiss J et al. An evaluation of the Constant-Murley shoulder  
24 assessment. *J Bone Joint Surg Br*. 1996;78:229-232.  
25  
26  
27  
28 32 Chalmers I, Glasziou P. Avoidable waste in the production and reporting of research  
29 evidence. *Lancet*. 2009;374:86-89.  
30  
31  
32  
33 33 McDonald J, Pettigrew J. Traumatic brachial plexus injury: the lived experience. *The*  
34 *British Journal of Occupational Therapy*. 2014;3:147-154.  
35  
36  
37  
38 34 Kim JH, Shin SH, Lee YR, et al. Ultrasound-guided peripheral nerve stimulation for  
39 neuropathic pain after brachial plexus injury: two case reports. *J Anesth*.  
40 2017;31:453-457.  
41  
42  
43  
44  
45 35 Miller C, Power D, Peek L et al. Psychological consequences of traumatic upper limb  
46 peripheral nerve injury: A systematic review. *Hand Therapy*. 2017;22:35–45.  
47  
48  
49  
50 36 Clavien PA, Sanabria JR, Strasberg SM. Proposed classification of complications of  
51 surgery with examples of utility in cholecystectomy. *Surgery*. 1992; 111:518-526.  
52  
53  
54  
55 37 Martins RS, Siqueira MG, Heise CO. A prospective study comparing single and double  
56 fascicular transfer to restore elbow flexion after brachial plexus injury. *Neurosurgery*.  
57 2013; 72:709-715.  
58  
59  
60

- 1  
2  
3 38 Young AE, Davies A, Bland S, et al. Systematic review of clinical outcome reporting in  
4  
5 randomized controlled trials of burn care. *BMJ Open*; 2019b, 9: e025135.  
6  
7  
8 39 Potter S, Brigid A, Whiting PF, et al. Reporting clinical outcomes of breast  
9  
10 reconstruction: a systematic review. *J Natl Cancer Inst.* 2011;103:31-46.  
11  
12  
13 40 Watzlawick R, Antonic A, Sena ES, et al. Outcome heterogeneity and bias in acute  
14  
15 experimental spinal cord injury: A meta-analysis. *Neurology.* 2019;93:e40-e51.  
16  
17  
18 41 Williamson PR, Altman DG, Blazeby JM et al. The COMET (Core Outcome Measures in  
19  
20 Effectiveness Trials) Initiative. *Trials.* 2011;12:A70.  
21  
22  
23 42 Bautista-Molano W, Navarro-Compán V, Landewé RB, et al. How well are the  
24  
25 ASAS/OMERACT Core Outcome Sets for Ankylosing Spondylitis implemented in  
26  
27 randomized clinical trials? A systematic literature review. *Clin Rheumatol.* 2014;33:  
28  
29 1313-1322.  
30  
31  
32 43 Clarke M. Standardizing outcomes for clinical trials and systematic reviews. *Trials.*  
33  
34 2007;8:39.  
35  
36  
37 44 Clarke M, Williamson PR. Core outcome sets and systematic reviews. *Syst Rev.*  
38  
39 2016;5:11.  
40  
41  
42 45 Pondaag W, Malessy MJA. Outcome assessment for Brachial Plexus birth injury.  
43  
44 Results from the iPluto world-wide consensus survey. *J Orthop Res.* 2018;36:2533-  
45  
46 2541.  
47  
48  
49 46 Williamson PR, Altman DG, Bagley H, et al. The COMET Handbook: version 1.0. *Trials.*  
50  
51 2017;18(Suppl 3):280.  
52  
53  
54 47 Pakhomov SV, Jacobsen SJ, Chute CG, et al. Agreement between patient-reported  
55  
56 symptoms and their documentation in the medical record. *Am J Manag Care.*  
57  
58 2008;14:530-539.  
59  
60

1  
2  
3 48 Turner GM, Slade A, Retzer A, et al. An introduction to patient-reported outcome  
4  
5 measures (PROMs) in trauma. *J Trauma Acute Care Surg.* 2019;86:314-320.  
6  
7  
8  
9

10  
11  
12 Figure 2 Legends  
13

14  
15 mths, months; NS, not stated; yrs, years.  
16  
17  
18  
19  
20  
21  
22  
23  
24  
25  
26  
27  
28  
29  
30  
31  
32  
33  
34  
35  
36  
37  
38  
39  
40  
41  
42  
43  
44  
45  
46  
47  
48  
49  
50  
51  
52  
53  
54  
55  
56  
57  
58  
59  
60



**Title:** Supplementary File 1 MEDLINE (OVID) search strategy**Article title:** Developing a core outcome set for Traumatic Brachial Plexus Injuries: a systematic review of outcomes**Author:** Miller et al (2020)

Search strategy 18/09/2018 COMBINE systematic review

## MEDLINE (OVID)

1.(brachial plexus adj3 injur\*).mp. [mp=title, abstract, original title, name of substance word, subject heading word, floating sub-heading word, keyword heading word, protocol supplementary concept word, rare disease supplementary concept word, unique identifier, synonyms]

2 (brachial plexus adj3 pals\*).mp. [mp=title, abstract, original title, name of substance word, subject heading word, floating sub-heading word, keyword heading word, protocol supplementary concept word, rare disease supplementary concept word, unique identifier, synonyms]

3 (brachial plexus adj3 lesion\*).mp. [mp=title, abstract, original title, name of substance word, subject heading word, floating sub-heading word, keyword heading word, protocol supplementary concept word, rare disease supplementary concept word, unique identifier, synonyms]

4 brachial plexopath\*.mp. [mp=title, abstract, original title, name of substance word, subject heading word, floating sub-heading word, keyword heading word, protocol supplementary concept word, rare disease supplementary concept word, unique identifier, synonyms]

5 (brachial plexus adj3 traction\*).mp. [mp=title, abstract, original title, name of substance word, subject heading word, floating sub-heading word, keyword heading word, protocol supplementary concept word, rare disease supplementary concept word, unique identifier, synonyms]

6 (brachial plexus adj3 avulsion\*).mp. [mp=title, abstract, original title, name of substance word, subject heading word, floating sub-heading word, keyword heading word, protocol supplementary concept word, rare disease supplementary concept word, unique identifier, synonyms]

7 Brachial Plexus/in, su, tr [Injuries, Surgery, Transplantation]

8 1 or 2 or 3 or 4 or 5 or 6 or 7

9 limit 8 to (humans and "all adult (19 plus years)")

10. limit 9 to yr= "2013- current"

## Supplementary file 2: COMET outcome taxonomy

Article title: Developing a core outcome set for Traumatic Brachial Plexus Injuries: a systematic review of outcomes

**Title:** Supplementary file 2: COMET outcome taxonomy - adapted from Dodd et al (2018)

| <b>Core Area</b>              | <b>Outcome Domain</b>                                                                                |
|-------------------------------|------------------------------------------------------------------------------------------------------|
| <b>Death</b>                  | 1. Mortality/ survival                                                                               |
| <b>Physiological/clinical</b> | 2. Blood and lymphatic system outcomes                                                               |
|                               | 3. Cardiac outcomes                                                                                  |
|                               | 4. Congenital, familial and genetic outcomes                                                         |
|                               | 5. Endocrine outcomes                                                                                |
|                               | 6. Ear and labyrinth outcomes                                                                        |
|                               | 7. Eye outcomes                                                                                      |
|                               | 8. Gastrointestinal outcomes                                                                         |
|                               | 9. General outcomes                                                                                  |
|                               | 10. Hepatobiliary outcomes                                                                           |
|                               | 11. Immune system outcomes                                                                           |
|                               | 12. Infection and infestation outcomes                                                               |
|                               | 13. Injury and poisoning outcomes                                                                    |
|                               | 14. Metabolism and nutrition outcomes                                                                |
|                               | 15. Musculoskeletal and connective tissue outcomes                                                   |
|                               | 16. Outcomes, relating to neoplasms: benign, malignant and unspecified ( including cysts and polyps) |
|                               | 17. Nervous system outcomes                                                                          |
|                               | 18. Pregnancy, puerperium and perinatal outcomes                                                     |
|                               | 19. Renal and urinary outcomes                                                                       |
|                               | 20. Reproductive system and breast outcomes                                                          |
|                               | 21. Psychiatric outcomes                                                                             |
|                               | 22. Respiratory, thoracic and mediastinal outcomes                                                   |
|                               | 23. Skin and subcutaneous tissue outcomes                                                            |
|                               | 24. Vascular outcomes                                                                                |
| <b>Life Impact</b>            | <b>Functioning</b>                                                                                   |
|                               | 25. Physical functioning                                                                             |
|                               | 26. Social functioning                                                                               |
|                               | 27. Role functioning                                                                                 |
|                               | 28. Emotional functioning/ well being                                                                |
|                               | 29. Cognitive functioning                                                                            |
|                               | 30. Global quality of life                                                                           |
|                               | 31. Perceived health status                                                                          |
|                               | 32. Delivery of care                                                                                 |
|                               | 33. Personal circumstances                                                                           |
| <b>Resource use</b>           | <b>Resource Use</b>                                                                                  |
|                               | 34. Economic                                                                                         |
|                               | 35. Hospital                                                                                         |
|                               | 36. Need for further intervention                                                                    |
|                               | 37. Societal/ carer burden                                                                           |
| <b>Adverse Events</b>         | 38. Adverse Events / effects                                                                         |

Dodd S, Clarke M, Becker L et al. A taxonomy has been developed for outcomes in medical research to help improve knowledge discovery. *J Clin Epidemiol.* 2018;96:84-92.

## Supplementary file 3. Included Studies

|    | <b>Study title</b>                                                                                                                                                                                            | <b>First author</b> | <b>Year of publication</b> |
|----|---------------------------------------------------------------------------------------------------------------------------------------------------------------------------------------------------------------|---------------------|----------------------------|
| 1  |                                                                                                                                                                                                               |                     |                            |
| 2  |                                                                                                                                                                                                               |                     |                            |
| 3  |                                                                                                                                                                                                               |                     |                            |
| 4  |                                                                                                                                                                                                               |                     |                            |
| 5  |                                                                                                                                                                                                               |                     |                            |
| 6  | <b>1</b>                                                                                                                                                                                                      |                     |                            |
| 7  | Effectiveness and safety of home-based muscle electrical stimulator in brachial plexus Injury patient(Limthongthang et al., 2014)                                                                             | Limthongthang       | 2014                       |
| 8  | <b>2</b>                                                                                                                                                                                                      |                     |                            |
| 9  | Elbow proprioception sense in total arm -type brachial plexus injured patients after neurotisation: a preliminary study(Homsreprasert et al., 2014)                                                           | Homreprasert        | 2014                       |
| 10 |                                                                                                                                                                                                               |                     |                            |
| 11 | <b>3</b>                                                                                                                                                                                                      |                     |                            |
| 12 | Comparison between the anterior and posterior approach for transfer of the spinal accessory nerve to the suprascapular nerve in late traumatic brachial plexus injuries (Souza et al., 2014)                  | Souza               | 2014                       |
| 13 |                                                                                                                                                                                                               |                     |                            |
| 14 | <b>4</b>                                                                                                                                                                                                      |                     |                            |
| 15 | Ultrasound-guided peripheral nerve stimulation for neuropathic pain after brachial plexus injury: two case reports(Kim et al., 2017)                                                                          | Kim                 | 2017                       |
| 16 |                                                                                                                                                                                                               |                     |                            |
| 17 | <b>5</b>                                                                                                                                                                                                      |                     |                            |
| 18 | Contralateral lower trapezius transfer for restoration of shoulder external rotation in traumatic brachial plexus palsy: preliminary report and literature review(Satbhai et al., 2014)                       | Satbhai             | 2014                       |
| 19 |                                                                                                                                                                                                               |                     |                            |
| 20 | <b>6</b>                                                                                                                                                                                                      |                     |                            |
| 21 | Restoration of shoulder abduction in brachial plexus avulsion injuries with double neurotization from the spinal accessory nerve: a report of 13 cases(Huan et al., 2017)                                     | Huan                | 2017                       |
| 22 |                                                                                                                                                                                                               |                     |                            |
| 23 | <b>7</b>                                                                                                                                                                                                      |                     |                            |
| 24 | Transfer of the musculocutaneous nerve branch to the brachialis muscle to the triceps for elbow extension: anatomical study and report of five cases(Bertelli et al., 2017)                                   | Bertelli            | 2017                       |
| 25 |                                                                                                                                                                                                               |                     |                            |
| 26 | <b>8</b>                                                                                                                                                                                                      |                     |                            |
| 27 | Posterior approach for accessory to suprascapular nerve transfer: an electrophysiological outcomes study(Rui et al., 2013)                                                                                    | Rui                 | 2013                       |
| 28 |                                                                                                                                                                                                               |                     |                            |
| 29 | <b>9</b>                                                                                                                                                                                                      |                     |                            |
| 30 | Reliability of functioning free muscle transfer and vascularized ulnar nerve grafting for elbow flexion in complete brachial plexus palsy (Potter and Ferris, 2017)                                           | Potter              | 2017                       |
| 31 |                                                                                                                                                                                                               |                     |                            |
| 32 | <b>10</b>                                                                                                                                                                                                     |                     |                            |
| 33 | Management of infraclavicular (Chuang Level IV) brachial plexus injuries: A single surgeon experience with 75 cases (Lam et al., 2015)                                                                        | Lam                 | 2015                       |
| 34 |                                                                                                                                                                                                               |                     |                            |
| 35 | <b>11</b>                                                                                                                                                                                                     |                     |                            |
| 36 | Functioning free muscle transfer for the restoration of elbow flexion in brachial plexus injury patients (Estrella and Montales 2016)                                                                         | Estrella            | 2016                       |
| 37 |                                                                                                                                                                                                               |                     |                            |
| 38 | <b>12</b>                                                                                                                                                                                                     |                     |                            |
| 39 | Radial to axillary nerve transfers: A combined case series(Desai et al., 2016)                                                                                                                                | Desai               | 2016                       |
| 40 |                                                                                                                                                                                                               |                     |                            |
| 41 | <b>13</b>                                                                                                                                                                                                     |                     |                            |
| 42 | Thalamic deep brain stimulation for neuropathic pain after amputation or brachial plexus avulsion(Pereira et al., 2013)                                                                                       | Pereira             | 2013                       |
| 43 |                                                                                                                                                                                                               |                     |                            |
| 44 | <b>14</b>                                                                                                                                                                                                     |                     |                            |
| 45 | Nerve transfers for shoulder function for traumatic brachial plexus injuries(Estrella et al., 2014)                                                                                                           | Estrella            | 2014                       |
| 46 |                                                                                                                                                                                                               |                     |                            |
| 47 | <b>15</b>                                                                                                                                                                                                     |                     |                            |
| 48 | Results of operative treatment of brachial plexus injury resulting from shoulder dislocation: A study with a long-term follow-up(Gutkowska et al., 2017)                                                      | Gutkowska           | 2017                       |
| 49 |                                                                                                                                                                                                               |                     |                            |
| 50 | <b>16</b>                                                                                                                                                                                                     |                     |                            |
| 51 | Surgical treatment of brachial plexus posterior cord lesion: A combination of nerve and tendon transfers, about nine patients(Oberlin., 2013)                                                                 | Oberlin             | 2013                       |
| 52 |                                                                                                                                                                                                               |                     |                            |
| 53 | <b>17</b>                                                                                                                                                                                                     |                     |                            |
| 54 | The medial cord to musculocutaneous (MCMc) nerve transfer: a new method to reanimate elbow flexion after C5-C6-C7-(C8) avulsive injuries of the brachial plexus—technique and results(Ferraresi et al., 2014) | Ferraresi           | 2014                       |
| 55 |                                                                                                                                                                                                               |                     |                            |
| 56 |                                                                                                                                                                                                               |                     |                            |
| 57 |                                                                                                                                                                                                               |                     |                            |
| 58 |                                                                                                                                                                                                               |                     |                            |
| 59 |                                                                                                                                                                                                               |                     |                            |
| 60 |                                                                                                                                                                                                               |                     |                            |

## Supplementary file 3. Included Studies

|    |           |                                                                                                                                                                                                                                         |                 |         |
|----|-----------|-----------------------------------------------------------------------------------------------------------------------------------------------------------------------------------------------------------------------------------------|-----------------|---------|
| 1  |           |                                                                                                                                                                                                                                         |                 |         |
| 2  |           |                                                                                                                                                                                                                                         |                 |         |
| 3  | <b>18</b> | Transfer of a terminal motor branch nerve to the flexor carpi ulnaris for triceps reinnervation: anatomical study and clinical cases(Bertelli et al., 2015)                                                                             | Bertelli        | 2015    |
| 4  |           |                                                                                                                                                                                                                                         |                 |         |
| 5  |           |                                                                                                                                                                                                                                         |                 |         |
| 6  |           |                                                                                                                                                                                                                                         |                 |         |
| 7  | <b>19</b> | Free functioning gracilis muscle transfer with and without simultaneous intercostal nerve transfer to musculocutaneous nerve for restoration of elbow flexion after traumatic adult brachial pan-plexus injury(Maldonado et al., 2017a) | Maldonado       | 2017(a) |
| 8  |           |                                                                                                                                                                                                                                         |                 |         |
| 9  |           |                                                                                                                                                                                                                                         |                 |         |
| 10 |           |                                                                                                                                                                                                                                         |                 |         |
| 11 |           |                                                                                                                                                                                                                                         |                 |         |
| 12 | <b>20</b> | Isolated latissimus dorsi transfer to restore shoulder external rotation in adults with brachial plexus injury(Ghosh et al., 2013)                                                                                                      | Ghosh           | 2013    |
| 13 |           |                                                                                                                                                                                                                                         |                 |         |
| 14 | <b>21</b> | Functional outcome and quality of life after traumatic total brachial plexus injury treated by nerve transfer or single/double free muscle transfers(Satbhai et al., 2016)                                                              | Satbhai         | 2016    |
| 15 |           |                                                                                                                                                                                                                                         |                 |         |
| 16 |           |                                                                                                                                                                                                                                         |                 |         |
| 17 |           |                                                                                                                                                                                                                                         |                 |         |
| 18 | <b>22</b> | Successful graded mirror therapy in a patient with chronic deafferentation pain in whom traditional mirror therapy was ineffective: A case report(Mibu et al., 2016)                                                                    | Mibu            | 2016    |
| 19 |           |                                                                                                                                                                                                                                         |                 |         |
| 20 |           |                                                                                                                                                                                                                                         |                 |         |
| 21 |           |                                                                                                                                                                                                                                         |                 |         |
| 22 | <b>23</b> | Bipolar Transfer of Latissimus Dorsi Myocutaneous Flap for Restoration of Elbow Flexion in Late Traumatic Brachial Plexus Injury: Evaluation of 13 Cases(Azab et al., 2017)                                                             | Azab            | 2017    |
| 23 |           |                                                                                                                                                                                                                                         |                 |         |
| 24 |           |                                                                                                                                                                                                                                         |                 |         |
| 25 | <b>24</b> | Comparison of objective muscle strength in C5-C6 and C5-C7 brachial plexus injury patients after double nerve transfer (Tsai et al. 2015)                                                                                               | Tsai            | 2014    |
| 26 |           |                                                                                                                                                                                                                                         |                 |         |
| 27 |           |                                                                                                                                                                                                                                         |                 |         |
| 28 | <b>25</b> | Phantom remodeling effect of dorsal root entry zone lesioning in phantom limb pain caused by brachial plexus avulsion(Son et al., 2015)                                                                                                 | Son             | 2015    |
| 29 |           |                                                                                                                                                                                                                                         |                 |         |
| 30 | <b>26</b> | Comparison of surgical strategies between proximal nerve graft and/or nerve transfer and distal nerve transfer based on functional restoration of elbow flexion: A retrospective review of 147 patients(Hu et al., 2018)                | Hu              | 2018    |
| 31 |           |                                                                                                                                                                                                                                         |                 |         |
| 32 |           |                                                                                                                                                                                                                                         |                 |         |
| 33 |           |                                                                                                                                                                                                                                         |                 |         |
| 34 |           |                                                                                                                                                                                                                                         |                 |         |
| 35 | <b>27</b> | Reconstruction of shoulder abduction by multiple nerve fascicle transfer through posterior approach(Ren et al., 2013)                                                                                                                   | Ren             | 2013    |
| 36 |           |                                                                                                                                                                                                                                         |                 |         |
| 37 |           |                                                                                                                                                                                                                                         |                 |         |
| 38 | <b>28</b> | Intercostal nerve transfer to neurotize the musculocutaneous nerve after traumatic brachial plexus avulsion: A comparison of two, three, and four nerve transfers(Xiao et al., 2014)                                                    | Xiao            | 2014    |
| 39 |           |                                                                                                                                                                                                                                         |                 |         |
| 40 |           |                                                                                                                                                                                                                                         |                 |         |
| 41 |           |                                                                                                                                                                                                                                         |                 |         |
| 42 | <b>29</b> | Use of the DEKA Arm for amputees with brachial plexus injury: A case series(Resnik et al., 2017)                                                                                                                                        | Resnik          | 2017    |
| 43 |           |                                                                                                                                                                                                                                         |                 |         |
| 44 | <b>30</b> | Polyester tape scapulopexy for chronic upper extremity brachial plexus injury(Leechavengvongs et al., 2015)                                                                                                                             | Leechavengvongs | 2015    |
| 45 |           |                                                                                                                                                                                                                                         |                 |         |
| 46 |           |                                                                                                                                                                                                                                         |                 |         |
| 47 | <b>31</b> | Contralateral C7 nerve transfer with direct coaptation to restore lower trunk function after traumatic brachial plexus avulsion(Wang et al., 2013)                                                                                      | Wang            | 2013    |
| 48 |           |                                                                                                                                                                                                                                         |                 |         |
| 49 |           |                                                                                                                                                                                                                                         |                 |         |
| 50 | <b>32</b> | Outcome of surgical reconstruction after traumatic total brachial plexus palsy(Dodakundi et al., 2013)                                                                                                                                  | Dodakundi       | 2013    |
| 51 |           |                                                                                                                                                                                                                                         |                 |         |
| 52 |           |                                                                                                                                                                                                                                         |                 |         |
| 53 | <b>33</b> | Bionic reconstruction to restore hand function after brachial plexus injury: a case series of three patients(Aszmann et al., 2015)                                                                                                      | Aszmann         | 2015    |
| 54 |           |                                                                                                                                                                                                                                         |                 |         |
| 55 | <b>34</b> | Surgical treatment of the plexus brachialis injury using long-lasting electrostimulation (Tsymbaliuk and Tretiak, 2013)                                                                                                                 | Tsymbalyuk      | 2013    |
| 56 |           |                                                                                                                                                                                                                                         |                 |         |
| 57 |           |                                                                                                                                                                                                                                         |                 |         |
| 58 | <b>35</b> | Phrenic nerve transfer for reconstruction of elbow extension in severe brachial plexus injuries(Flores and Socolovsky, 2016)                                                                                                            | Flores          | 2016    |
| 59 |           |                                                                                                                                                                                                                                         |                 |         |
| 60 |           |                                                                                                                                                                                                                                         |                 |         |

## Supplementary file 3. Included Studies

|    |    |                                                                           |           |         |
|----|----|---------------------------------------------------------------------------|-----------|---------|
| 1  |    |                                                                           |           |         |
| 2  |    |                                                                           |           |         |
| 3  | 36 | Direct coaptation of the phrenic nerve with the posterior division of     | Wang      | 2016    |
| 4  |    | the lower trunk to restore finger and elbow extension function in         |           |         |
| 5  |    | patients with total brachial plexus injuries( Wang et al., 2016)          |           |         |
| 6  |    |                                                                           |           |         |
| 7  |    |                                                                           |           |         |
| 8  | 37 | A prospective study comparing single and double fascicular transfer to    | Martins   | 2013    |
| 9  |    | restore elbow flexion after brachial plexus injury(Martins et al., 2013)  |           |         |
| 10 | 38 | Chronic post-traumatic neuropathic pain of brachial plexus and upper      | Stevanato | 2014    |
| 11 |    | limb: a new technique of peripheral nerve stimulation(Stevanato et al.,   |           |         |
| 12 |    | 2014)                                                                     |           |         |
| 13 |    |                                                                           |           |         |
| 14 | 39 | Effectiveness of contralateral C7 nerve root and multiple nerve           | Wei       | 2014    |
| 15 |    | transfer for treatment of brachial plexus root avulsion(Wei et al., 2014) |           |         |
| 16 | 40 | Combined proximal nerve graft and distal nerve transfer for a posterior   | Plate     | 2013    |
| 17 |    | cord brachial plexus injury(Plate et al., 2013)                           |           |         |
| 18 |    |                                                                           |           |         |
| 19 | 41 | The role of elective amputation in patients with traumatic brachial       | Maldonado | 2016    |
| 20 |    | plexus injury(Maldonado et al., 2016b)                                    |           |         |
| 21 | 42 | Early microsurgical management of clavicular fracture combined with       | Liu       | 2014(a) |
| 22 |    | brachial plexus injury( Liu et al., 2014)                                 |           |         |
| 23 |    |                                                                           |           |         |
| 24 | 43 | Contralateral trapezius transfer to restore shoulder external rotation    | Elhassan  | 2016    |
| 25 |    | following adult brachial plexus injury (Elhassan et al., 2016)            |           |         |
| 26 | 44 | Comparative study of phrenic nerve transfers with and without nerve       | Liu       | 2014    |
| 27 |    | graft for elbow flexion after global brachial plexus injury(Liu et al.,   |           |         |
| 28 |    | 2014)                                                                     |           |         |
| 29 |    |                                                                           |           |         |
| 30 | 45 | Shoulder and elbow recovery at 2 and 11 years following brachial          | Wang      | 2016    |
| 31 |    | plexus reconstruction( Wang et al., 2016)                                 |           |         |
| 32 |    |                                                                           |           |         |
| 33 | 46 | Functional outcomes after treatment of traumatic brachial plexus          | Aras      | 2013    |
| 34 |    | injuries: clinical study(Aras et al., 2013)                               |           |         |
| 35 | 47 | Free gracilis transfer reinnervated by the nerve to the supinator for the | Soldado   | 2013    |
| 36 |    | reconstruction of finger and thumb extension in longstanding C7-T1        |           |         |
| 37 |    | brachial plexus root avulsion(Soldado et al., 2013)                       |           |         |
| 38 |    |                                                                           |           |         |
| 39 | 48 | Restoration of hand function in C7–T1 brachial plexus palsies using a     | Zhang     | 2014    |
| 40 |    | staged approach with nerve and tendon transfer(Zhang et al., 2014)        |           |         |
| 41 | 49 | Neurotization to innervate the deltoid and biceps: 3 cases(Dy et al.,     | Dy        | 2013    |
| 42 |    | 2013)                                                                     |           |         |
| 43 |    |                                                                           |           |         |
| 44 | 50 | Arthroscopic arthrodesis of the shoulder in brachial plexus palsy(Lenoir  | Lenoir    | 2017    |
| 45 |    | et al., 2017)                                                             |           |         |
| 46 | 51 | Outcome of contralateral C7 nerve transferring to median nerve(Kai-       | Gao       | 2013    |
| 47 |    | ming Gao et al., 2013)                                                    |           |         |
| 48 |    |                                                                           |           |         |
| 49 | 52 | Intercostal nerve transfer to the biceps motor branch in complete         | Cho       | 2015    |
| 50 |    | traumatic brachial plexus injuries (Cho et al., 2015)                     |           |         |
| 51 | 53 | Tactile feedback for relief of deafferentation pain using virtual reality | Sano      | 2016    |
| 52 |    | system: a pilot study(Sano et al., 2016)                                  |           |         |
| 53 |    |                                                                           |           |         |
| 54 | 54 | Functioning free gracilis transfer to reconstruct elbow flexion and       | Yang      | 2016    |
| 55 |    | quality of life in global brachial plexus injured patients(Yang et al.,   |           |         |
| 56 |    | 2016)                                                                     |           |         |
| 57 |    |                                                                           |           |         |
| 58 |    |                                                                           |           |         |
| 59 |    |                                                                           |           |         |
| 60 |    |                                                                           |           |         |

## Supplementary file 3. Included Studies

|    |                                                                                                                                                                                                                  |                 |      |
|----|------------------------------------------------------------------------------------------------------------------------------------------------------------------------------------------------------------------|-----------------|------|
| 55 | Evaluation of infraspinatus reinnervation and function following spinal accessory nerve to suprascapular nerve transfer in adult traumatic brachial plexus injuries(Baltzer et al., 2017)                        | Baltzer         | 2017 |
| 56 | Anatomic study of the intercostal nerve transfer to the suprascapular nerve and a case report(Hu et al., 2014)                                                                                                   | Hu              | 2014 |
| 57 | Shoulder abduction and external rotation restoration with nerve transfer(Kostas-Agnantis et al., 2013)                                                                                                           | Kostas-Agnantis | 2013 |
| 58 | Contralateral C-7 transfer: is direct repair really superior to grafting?(Bhatia et al., 2017)                                                                                                                   | Bhatia          | 2017 |
| 59 | Impact of phrenic nerve paralysis on the surgical outcome of intercostal nerve transfer(Kita et al., 2015)                                                                                                       | Kita            | 2015 |
| 60 | Flow-through anastomosis using a T-shaped vascular pedicle for gracilis functioning free muscle transplantation in brachial plexus injury(Hou et al., 2015)                                                      | Hou             | 2015 |
| 61 | Free functional muscle transfer tendon insertion secondary advancement procedure to improve elbow flexion(Sechachalam et al., 2017)                                                                              | Sechachalam     | 2017 |
| 62 | Dual nerve transfers for restoration of shoulder function after brachial plexus avulsion injury(Chu et al., 2016)                                                                                                | Chu             | 2016 |
| 63 | Cortical plasticity after brachial plexus injury and repair: a resting-state functional MRI study(Bhat et al., 2017)                                                                                             | Bhat            | 2017 |
| 64 | Results of spinal accessory to suprascapular nerve transfer in 110 patients with complete palsy of the brachial plexus(Bertelli et al., 2016)                                                                    | Bertelli        | 2016 |
| 65 | Magnetic resonance neurographic and clinical long-term results after oberlins transfer for adult brachial plexus injuries(Frueh et al., 2017)                                                                    | Frueh           | 2017 |
| 66 | Free functioning gracilis muscle transfer versus intercostal nerve transfer to musculocutaneous nerve for restoration of elbow flexion after traumatic adult brachial pan-plexus injury(Maldonado et al., 2016a) | Maldonado       | 2016 |
| 67 | Results of wrist extension reconstruction in C5–8 brachial plexus palsy by transferring the pronator quadratus motor branch to the extensor carpi radialis brevis muscle(Bertelli et al., 2016)                  | Bertelli        | 2016 |
| 68 | Donor nerve sources in free functional gracilis muscle transfer for elbow flexion in adult brachial plexus injury(Nicoson et al., 2017)                                                                          | Nicoson         | 2017 |
| 69 | Use of contralateral spinal accessory nerve for ipsilateral suprascapular neurotization in global brachial plexus injury: a new technique(Bhandari and Deb, 2016)                                                | Bhandari        | 2016 |
| 70 | Objective evaluation of elbow flexion strength and fatigability after nerve transfer in adult traumatic brachial plexus injuries (Maricq et al., 2014)                                                           | Maricq          | 2014 |
| 71 | Outcomes of muscle brachialis transfer to restore finger flexion in brachial plexus palsy(DeGeorge et al., 2017)                                                                                                 | DeGeorge        | 2017 |
| 72 | Functional outcome of nerve transfers for traumatic global brachial plexus avulsion(Liu et al., 2013)                                                                                                            | Liu             | 2013 |

## Supplementary file 3. Included Studies

|    |                                                                                                                                                                                                                                                    |                |      |
|----|----------------------------------------------------------------------------------------------------------------------------------------------------------------------------------------------------------------------------------------------------|----------------|------|
| 73 | Transfer of a flexor digitorum superficialis motor branch for wrist extension reconstruction in C5-C8 root injuries of the brachial plexus: a case series(Bertelli and Ghizoni, 2013)                                                              | Bertelli       | 2013 |
| 74 | Outcome after transfer of intercostal nerves to the nerve of triceps long head in 25 adult patients with total plexus root avulsion injury(KaiMing Gao et al., 2013)                                                                               | Gao            | 2013 |
| 75 | Good sensory recovery of the hand in brachial plexus surgery using the intercostobrachial nerve as the donor(Foroni et al., 2017)                                                                                                                  | Foroni         | 2017 |
| 76 | The phrenic nerve as a donor for brachial plexus injuries: is it safe and effective? Case series and literature analysis(Socolovsky et al., 2015)                                                                                                  | Socolovsky     | 2015 |
| 77 | Complete avulsion of brachial plexus with associated vascular trauma: Feasibility of reconstruction using the double free muscle technique(Hattori et al., 2013)                                                                                   | Hattori        | 2013 |
| 78 | Long-term outcome of brachial plexus re-implantation after complete brachial plexus avulsion injury(Kachramanoglou et al., 2017)                                                                                                                   | Kachramanoglou | 2017 |
| 79 | Force recovery assessment of functioning free muscle transfers using ultrasonography(Kodama et al., 2014)                                                                                                                                          | Kodama         | 2014 |
| 80 | Rhomboid nerve transfer to the suprascapular nerve for shoulder reanimation in brachial plexus palsy: A clinical report(Goubier and Teboul, 2016)                                                                                                  | Goubier        | 2016 |
| 81 | Outcome of contralateral C7 transfer to two recipient nerves in 22 patients with the total brachial plexus avulsion injury(Kaiming et al., 2013)                                                                                                   | Gao            | 2013 |
| 82 | Comparative study of phrenic and intercostal nerve transfers for elbow flexion after global brachial plexus injury(Yuzhou et al., 2015)                                                                                                            | Liu            | 2015 |
| 83 | Donor-side morbidity after contralateral C-7 nerve transfer: results at a minimum of 6 months after surgery( Li et al., 2016)                                                                                                                      | Li             | 2016 |
| 84 | Outcome after brachial plexus injury surgery and impact on quality of life(Rasulic et al., 2017)                                                                                                                                                   | Rasulić        | 2017 |
| 85 | Pronator teres branch transfer to the anterior interosseous nerve for treating C8T1 brachial plexus avulsion: An anatomic study and case report(Yang et al., 2014)                                                                                 | Yang           | 2014 |
| 86 | Operative treatment with nerve repair can restore function in patients with traction injuries in the brachial plexus(Stiasny et al., 2015)                                                                                                         | Stiasny        | 2015 |
| 87 | Thoracodorsal nerve transfer for triceps reinnervation in partial brachial plexus injuries(Soldado et al., 2016)                                                                                                                                   | Soldado        | 2016 |
| 88 | Co-infusion of autologous adipose tissue derived neuronal differentiated mesenchymal stem cells and bone marrow derived hematopoietic stem cells, a viable therapy for post-traumatic brachial plexus injury: a case report (Thakkar et al., 2014) | Thakkar        | 2014 |
| 89 | Long-term clinical outcomes of spinal accessory nerve transfer to the suprascapular nerve in patients with brachial plexus palsy(Emamhadi et al., 2016)                                                                                            | Emamhadi       | 2016 |
| 90 | Surgical treatment for total root avulsion type brachial plexus injuries by neurotisation: a prospective comparison study between total and hemicentral C7 nerve root transfer(Tu et al., 2014)                                                    | Tu             | 2014 |

## Supplementary file 3. Included Studies

|    |            |                                                                                                                                                                                                                          |                     |
|----|------------|--------------------------------------------------------------------------------------------------------------------------------------------------------------------------------------------------------------------------|---------------------|
| 1  |            |                                                                                                                                                                                                                          |                     |
| 2  |            |                                                                                                                                                                                                                          |                     |
| 3  | <b>91</b>  | Deactivation of distant pain-related regions induced by 20-day rTMS: a case study of one-week pain relief for long-term intractable deafferentation pain (Qiu et al., 2014)                                              | Qiu 2014            |
| 4  |            |                                                                                                                                                                                                                          |                     |
| 5  | <b>92</b>  | End-to-side neuroorrhaphy in brachial plexus reconstruction(Haninec et al., 2013)                                                                                                                                        | Haninec 2013        |
| 6  |            |                                                                                                                                                                                                                          |                     |
| 7  | <b>93</b>  | Reanimation of elbow extension with medial pectoral nerve transfer in partial injuries to the brachial plexus (Flores., 2013)                                                                                            | Flores 2013         |
| 8  |            |                                                                                                                                                                                                                          |                     |
| 9  | <b>94</b>  | Early post-operative results after repair of traumatic brachial plexus palsy(Mohammad-Reda., 2013)                                                                                                                       | Mohammad-Reda 2013  |
| 10 |            |                                                                                                                                                                                                                          |                     |
| 11 | <b>95</b>  | Satisfied patients after shoulder arthrodesis for brachial plexus lesions even after 20 years of follow-up(van der Lingen et al., 2018)                                                                                  | van der Lingen 2018 |
| 12 |            |                                                                                                                                                                                                                          |                     |
| 13 | <b>96</b>  | Posterior branch of the axillary nerve transfer to the lateral triceps branch for restoration of elbow extension: case report(Klika et al., 2013)                                                                        | Kilka 2013          |
| 14 |            |                                                                                                                                                                                                                          |                     |
| 15 | <b>97</b>  | Clinical analysis of repairing the whole brachial plexus nerve root avulsion by transferring C7 nerve root from the uninjured side(Liu et al., 2014)                                                                     | Liu 2014            |
| 16 |            |                                                                                                                                                                                                                          |                     |
| 17 | <b>98</b>  | Bipolar transfer of the pectoralis major muscle for restoration of elbow flexion in 29 cases(Cambon-Binder et al., 2018)                                                                                                 | Cambon-Binder 2018  |
| 18 |            |                                                                                                                                                                                                                          |                     |
| 19 | <b>99</b>  | Thoracodorsal nerve transfer for elbow flexion reconstruction in infraclavicular brachial plexus injuries(Soldado et al., 2014)                                                                                          | Soldado 2014        |
| 20 |            |                                                                                                                                                                                                                          |                     |
| 21 | <b>100</b> | Median nerve fascicle transfer versus ulnar nerve fascicle transfer to the biceps motor branch in C5-C6 and C5-C7 brachial plexus injuries: nonrandomised prospective study of 23 consecutive patients(Cho et al., 2014) | Cho 2014            |
| 22 |            |                                                                                                                                                                                                                          |                     |
| 23 | <b>101</b> | Free functional muscle transplantation of an anomalous femoral adductor with a very large muscle belly: a case report(Kaizawa et al., 2013)                                                                              | Kaizawa 2013        |
| 24 |            |                                                                                                                                                                                                                          |                     |
| 25 | <b>102</b> | Selective neurotisation of the radial nerve in the axilla using the intercostal nerve to treat complete brachial plexus palsy(Tuohuti et al., 2016)                                                                      | Tuohuti 2016        |
| 26 |            |                                                                                                                                                                                                                          |                     |
| 27 | <b>103</b> | Objective predictors of functional recovery associated with intercostal nerves transfer for triceps reinnervation in global brachial plexus palsy(Flores., 2016)                                                         | Flores 2016         |
| 28 |            |                                                                                                                                                                                                                          |                     |
| 29 | <b>104</b> | Nerve transfer to relieve pain in upper brachial plexus injuries: does it work? (Emamhadi., 2017)                                                                                                                        | Emamhadi 2017       |
| 30 |            |                                                                                                                                                                                                                          |                     |
| 31 | <b>105</b> | Phrenic nerve transfer versus intercostal nerve transfer for the repair of brachial plexus root avulsion injuries(Abdixbir et al., 2016)                                                                                 | Abdixbir 2016       |
| 32 |            |                                                                                                                                                                                                                          |                     |
| 33 | <b>106</b> | End-to-side neuroorrhaphy to restore elbow flexion in brachial plexus injury(Limthongthang et al., 2016)                                                                                                                 | Limthongthang 2016  |
| 34 |            |                                                                                                                                                                                                                          |                     |
| 35 | <b>107</b> | Chordata method combined with electrotherapy in functional recovery after brachial plexus injury:report of three clinical cases(De Oliveira et al., 2016)                                                                | De Oliveira 2016    |
| 36 |            |                                                                                                                                                                                                                          |                     |
| 37 | <b>108</b> | Clinical outcome following transfer of the supinator motor branch to the posterior interosseous nerve in patients with C7-T1 brachial plexus palsy(Xu et al., 2015)                                                      | Xu 2015             |
| 38 |            |                                                                                                                                                                                                                          |                     |
| 39 |            |                                                                                                                                                                                                                          |                     |
| 40 |            |                                                                                                                                                                                                                          |                     |
| 41 |            |                                                                                                                                                                                                                          |                     |
| 42 |            |                                                                                                                                                                                                                          |                     |
| 43 |            |                                                                                                                                                                                                                          |                     |
| 44 |            |                                                                                                                                                                                                                          |                     |
| 45 |            |                                                                                                                                                                                                                          |                     |
| 46 |            |                                                                                                                                                                                                                          |                     |
| 47 |            |                                                                                                                                                                                                                          |                     |
| 48 |            |                                                                                                                                                                                                                          |                     |
| 49 |            |                                                                                                                                                                                                                          |                     |
| 50 |            |                                                                                                                                                                                                                          |                     |
| 51 |            |                                                                                                                                                                                                                          |                     |
| 52 |            |                                                                                                                                                                                                                          |                     |
| 53 |            |                                                                                                                                                                                                                          |                     |
| 54 |            |                                                                                                                                                                                                                          |                     |
| 55 |            |                                                                                                                                                                                                                          |                     |
| 56 |            |                                                                                                                                                                                                                          |                     |
| 57 |            |                                                                                                                                                                                                                          |                     |
| 58 |            |                                                                                                                                                                                                                          |                     |
| 59 |            |                                                                                                                                                                                                                          |                     |
| 60 |            |                                                                                                                                                                                                                          |                     |



## Supplementary file 3. Included Studies

|    |            |                                                                             |            |         |
|----|------------|-----------------------------------------------------------------------------|------------|---------|
| 1  |            |                                                                             |            |         |
| 2  |            |                                                                             |            |         |
| 3  | <b>109</b> | Transposition of branches of radial nerve innervating supinator to          | Wu         | 2017    |
| 4  |            | posterior interosseous nerve for functional reconstruction of finger        |            |         |
| 5  |            | and thumb extension in 4 patients with middle and lower trunk root          |            |         |
| 6  |            | avulsion injuries of brachial plexus(Wu et al., 2017)                       |            |         |
| 7  |            |                                                                             |            |         |
| 8  | <b>110</b> | Electromyographic findings in gracilis muscle grafts used to augment        | Kazamel    | 2016    |
| 9  |            | elbow flexion in traumatic brachial plexopathy(Kazamel and Sorenson,        |            |         |
| 10 |            | 2016)                                                                       |            |         |
| 11 |            |                                                                             |            |         |
| 12 | <b>111</b> | Double distal intraneural fascicular nerve transfers for lower brachial     | Li         | 2016    |
| 13 |            | plexus injuries(Li et al., 2016)                                            |            |         |
| 14 |            |                                                                             |            |         |
| 15 | <b>112</b> | Restoration of elbow and hand function in total brachial plexus palsy       | Amal       | 2016    |
| 16 |            | with intercostal nerves and C5 root neurotisation. Results in 21            |            |         |
| 17 |            | patients(Arnal et al., 2016)                                                |            |         |
| 18 |            |                                                                             |            |         |
| 19 | <b>113</b> | The phrenic nerve transfer in the treatment of a septuagenarian with        | Jiang      | 2018    |
| 20 |            | brachial plexus avulsion injury: a case study(Jiang and Lao, 2018)          |            |         |
| 21 |            |                                                                             |            |         |
| 22 | <b>114</b> | Outcomes of transferring a healthy motor fascicle from the radial           | Flores     | 2017    |
| 23 |            | nerve to a branch for the triceps to recover elbow extension in partial     |            |         |
| 24 |            | brachial plexus palsy(Flores., 2017)                                        |            |         |
| 25 |            |                                                                             |            |         |
| 26 | <b>115</b> | Successful nerve transfers for traumatic brachial plexus palsy in a         | Johnsen    | 2016    |
| 27 |            | septuagenarian(Johnsen and Wolfe, 2016)                                     |            |         |
| 28 |            |                                                                             |            |         |
| 29 | <b>116</b> | Free functioning gracilis muscle transfer for elbow flexion                 | Maldonado  | 2017(b) |
| 30 |            | reconstruction after traumatic brachial pan-plexus injury: Where is the     |            |         |
| 31 |            | optimal distal tendon attachment for elbow flexion?(Maldonado et al.,       |            |         |
| 32 |            | 2017b)                                                                      |            |         |
| 33 | <b>117</b> | Results of distal nerve transfers in restoration of shoulder function in    | Bhandari   | 2017    |
| 34 |            | C5 and C6 root avulsion injury to the brachial plexus (Bhandari., 2017)     |            |         |
| 35 |            |                                                                             |            |         |
| 36 | <b>118</b> | Bipolar dual-lead spinal cord stimulation between two electrodes on         | Watanabe   | 2018    |
| 37 |            | the ventral and dorsal sides of the spinal cord: consideration of           |            |         |
| 38 |            | putative mechanisms(Watanabe et al., 2018)                                  |            |         |
| 39 |            |                                                                             |            |         |
| 40 | <b>119</b> | Triceps nerve to deltoid nerve transfer after an unsatisfactory intra-      | Al-Qattan  | 2017    |
| 41 |            | plexus neurotisation of the posterior division of the upper trunk(Al-       |            |         |
| 42 |            | Qattan et al., 2017)                                                        |            |         |
| 43 |            |                                                                             |            |         |
| 44 | <b>120</b> | Trapezius muscle transfer for restoration of elbow extension in a           | Alrabai    | 2018    |
| 45 |            | traumatic brachial plexus injury(Alrabai et al., 2018)                      |            |         |
| 46 |            |                                                                             |            |         |
| 47 | <b>121</b> | Transfer of the radial nerve branch to the extensor carpi radialis brevis   | Bertelli   | 2015    |
| 48 |            | to the anterior interosseous nerve to reconstruct thumb and finger          |            |         |
| 49 |            | flexion(Bertelli., 2015)                                                    |            |         |
| 50 |            |                                                                             |            |         |
| 51 | <b>122</b> | Ultrasound-guided pulse-dose radiofrequency: treatment of                   | Magistrini | 2014    |
| 52 |            | neuropathic pain after brachial plexus lesion and arm                       |            |         |
| 53 |            | vascularisation(Magistrini et al., 2014)                                    |            |         |
| 54 |            |                                                                             |            |         |
| 55 | <b>123</b> | Phrenic nerve transfer to the musculocutaneous nerve for the repair         | Liu        | 2015    |
| 56 |            | of brachial plexus injury: electrophysiological characteristics(Liu et al., |            |         |
| 57 |            | 2015)                                                                       |            |         |
| 58 |            |                                                                             |            |         |
| 59 | <b>124</b> | Postoperative motor deficits following elbow flexion reanimation by         | Hanneur    | 2018    |
| 60 |            | nerve transfer( Hanneur et al., 2018)                                       |            |         |

## Supplementary file 3. Included Studies

|    |            |                                                                          |            |      |
|----|------------|--------------------------------------------------------------------------|------------|------|
| 1  |            |                                                                          |            |      |
| 2  |            |                                                                          |            |      |
| 3  | <b>125</b> | Comparative study of phrenic and partial ulnar nerve transfers for       | Liu        | 2018 |
| 4  |            | elbow flexion after upper brachial plexus avulsion-a retrospective       |            |      |
| 5  |            | clinical analysis(Liu et al., 2018)                                      |            |      |
| 6  |            |                                                                          |            |      |
| 7  | <b>126</b> | Contralateral medial pectoral nerve transfer with free gracilis muscle   | Yavari     | 2018 |
| 8  |            | transfer in old brachial plexus injury(Yavari et al., 2018)              |            |      |
| 9  |            |                                                                          |            |      |
| 10 | <b>127</b> | MEG-BMI to control phantom limb pain(Yanagisawa et al., 2018)            | Yanagisawa | 2018 |
| 11 | <b>128</b> | Complete brachial plexus injury- an amputation dilemma, A case           | Choong     | 2015 |
| 12 |            | report(Choong and Shalimar, 2015)                                        |            |      |
| 13 | <b>129</b> | Reversal of phantom pain and hand-to-face remapping after brachial       | Tsao       | 2016 |
| 14 |            | plexus avulsion(Tsao and Finn, 2016)                                     |            |      |
| 15 |            |                                                                          |            |      |
| 16 | <b>130</b> | A newly developed upper limb single-joint HAL in a patient with elbow    | Kubota     | 2017 |
| 17 |            | flexion reconstruction after traumatic brachial plexus injury: A case    |            |      |
| 18 |            | report(Kubota et al., 2017)                                              |            |      |
| 19 |            |                                                                          |            |      |
| 20 | <b>131</b> | Free reverse gracilis muscle combined with steindler flexorplasty for    | Bertelli   | 2018 |
| 21 |            | elbow flexion reconstruction after failed primary repair of extended     |            |      |
| 22 |            | upper-type paralysis of the brachial plexus(Bertelli., 2018)             |            |      |
| 23 | <b>132</b> | Multiple nerve and tendon transfers – a new strategy for restoring       | Xu         | 2017 |
| 24 |            | hand function in a patient with C7-T1 brachial plexus avulsions(Xu et al |            |      |
| 25 |            | ., 2017)                                                                 |            |      |
| 26 |            |                                                                          |            |      |
| 27 |            |                                                                          |            |      |
| 28 |            |                                                                          |            |      |
| 29 |            |                                                                          |            |      |
| 30 |            |                                                                          |            |      |
| 31 |            |                                                                          |            |      |
| 32 |            |                                                                          |            |      |
| 33 |            |                                                                          |            |      |
| 34 |            |                                                                          |            |      |
| 35 |            |                                                                          |            |      |
| 36 |            |                                                                          |            |      |
| 37 |            |                                                                          |            |      |
| 38 |            |                                                                          |            |      |
| 39 |            |                                                                          |            |      |
| 40 |            |                                                                          |            |      |
| 41 |            |                                                                          |            |      |
| 42 |            |                                                                          |            |      |
| 43 |            |                                                                          |            |      |
| 44 |            |                                                                          |            |      |
| 45 |            |                                                                          |            |      |
| 46 |            |                                                                          |            |      |
| 47 |            |                                                                          |            |      |
| 48 |            |                                                                          |            |      |
| 49 |            |                                                                          |            |      |
| 50 |            |                                                                          |            |      |
| 51 |            |                                                                          |            |      |
| 52 |            |                                                                          |            |      |
| 53 |            |                                                                          |            |      |
| 54 |            |                                                                          |            |      |
| 55 |            |                                                                          |            |      |
| 56 |            |                                                                          |            |      |
| 57 |            |                                                                          |            |      |
| 58 |            |                                                                          |            |      |
| 59 |            |                                                                          |            |      |
| 60 |            |                                                                          |            |      |

## Supplementary file 3. Included Studies

## References

- [1] Limthongthang R, Muennoi P, Phoojaroenchanachai R, Vathana T, Wongtrakul S. Effectiveness and safety of home-based muscle electrical stimulator in brachial plexus injury patients. *J Med Assoc Thai*. 2014, 97: S56–61.
- [2] Homsreprasert T, Limthongthang R, Vathana T, Wongtrakul S. Elbow joint proprioceptive sense in total arm-type brachial plexus injured patients after neurotization: a preliminary study. *J Med Assoc Thai*. 2014, 97: S103–7.
- [3] Souza F, Bernardino S, Filho H, Gobbato PL, Martins HAL, Martins RS, et al. Comparison between the anterior and posterior approach for transfer of the spinal accessory nerve to the suprascapular nerve in late traumatic brachial plexus injuries. *Acta Neurochir (Wien)* 2014, 156: 2345–9.
- [4] Kim JH, Shin SH, Lee YR, Lee HS, Chon JY, Sung CH, et al. Ultrasound-guided peripheral nerve stimulation for neuropathic pain after brachial plexus injury: two case reports. *J Anesth*. 2017, 31: 453–7.
- [5] Satbhai NG, Doi K, Hattori Y, Sakamoto S. Contralateral lower trapezius transfer for restoration of shoulder external rotation in traumatic brachial plexus palsy: a preliminary report and literature review. *J Hand Surg Eur*. 2014, 39: 861–7.
- [6] Huan KWSJ, Tan JSW, Tan SH, Teoh LC, Yong FC. Restoration of shoulder abduction in brachial plexus avulsion injuries with double neurotization from the spinal accessory nerve: a report of 13 cases. *J Hand Surg Eur*. 2017, 42: 700–5.
- [7] Bertelli JA, Soldado F, Ghizoni MF, Rodriguez-Baeza A, J.A. B, F. S, et al. Transfer of the musculocutaneous nerve branch to the brachialis muscle to the triceps for elbow extension: anatomical study and report of five cases. *J Hand Surg Eur*. 2017, 42: 710–4.
- [8] Rui J, Zhao X, Zhu Y, Gu Y, Lao J, J. R, et al. Posterior approach for accessory-suprascapular nerve transfer: an electrophysiological outcomes study. *J Hand Surg Eur*, 2013, 38: 242–7.
- [9] Potter SM, Ferris SI. Reliability of functioning free muscle transfer and vascularized ulnar nerve grafting for elbow flexion in complete brachial plexus palsy. *J Hand Surg Eur Vol* 2017, 42: 693–9.
- [10] Lam WL, Fufa D, Chang N-J, Chuang DC-C. Management of infraclavicular (Chuang Level IV) brachial plexus injuries: A single surgeon experience with 75 cases. *J Hand Surg Eur*. 2015, 40: 573–82.
- [11] Estrella EP, Montales TD. Functioning free muscle transfer for the restoration of elbow flexion in brachial plexus injury patients. *Injury*. 2016, 47: 2525–33.
- [12] Desai MJ, Daly CA, Seiler JG 3rd, Wray WH 3rd, Ruch DS, Leversedge FJ, et al. Radial to Axillary Nerve Transfers: A Combined Case Series. *J Hand Surg Am*. 2016, 41: 1128–34.
- [13] Pereira EAC, Boccard SG, Linhares P, Chamadoira C, Rosas MJ, Abreu P, et al. Thalamic deep brain stimulation for neuropathic pain after amputation or brachial plexus avulsion. *Neurosurg Focus*. 2013, 35:E7.
- [14] Estrella EP, Favila AS Jr. Nerve transfers for shoulder function for traumatic brachial plexus injuries. *J Reconstr Microsurg*. 2014, 30: 59-64.

## Supplementary file 3. Included Studies

- 1  
2  
3 [15] Gutkowska O, Martynkiewicz J, Mizia S, Bak M, Gosk J. Results of Operative Treatment of  
4 Brachial Plexus Injury Resulting from Shoulder Dislocation: A Study with A Long-Term Follow-  
5 Up. *World Neurosurg.* 2017,105:623–31.  
6  
7 [16] Oberlin C, Chino J, Belkheyar Z. Surgical treatment of brachial plexus posterior cord lesion: A  
8 combination of nerve and tendon transfers, about nine patients. *Chir Main.* 2013, 32:141–6.  
9  
10 [17] Ferraresi S, Garozzo D, Basso E, Maistrello L, Lucchin F, Di Pasquale P. The medial cord to  
11 musculocutaneous (MCMc) nerve transfer: A new method to reanimate elbow flexion after  
12 C5-C6-C7-(C8) avulsive injuries of the brachial plexus - Technique and results. *Neurosurg Rev.*  
13 2014, 37:321–9.  
14  
15 [18] Bertelli J, Soldado F, Ghizoni MF, Rodriguez-Baeza A, J. B, F. S, et al. Transfer of a terminal  
16 motor branch nerve to the flexor carpi ulnaris for triceps reinnervation: Anatomical study and  
17 clinical cases. *J Hand Surg Am.* 2015, 40:2229-2235.  
18  
19 [19] Maldonado AA, Kircher MF, Spinner RJ, Bishop AT, Shin AY. Free Functioning Gracilis Muscle  
20 Transfer With and Without Simultaneous Intercostal Nerve Transfer to Musculocutaneous  
21 Nerve for Restoration of Elbow Flexion After Traumatic Adult Brachial Pan-Plexus Injury. *J*  
22 *Hand Surg Am* 2017, 42: 293.  
23  
24 [20] Ghosh S, Singh VK, Jeyaseelan L, Sinisi M, Fox M, S. G, et al. Isolated latissimus dorsi transfer  
25 to restore shoulder external rotation in adults with brachial plexus injury. *Bone Jt J.* 2013, 95:  
26 660–3.  
27  
28 [21] Satbhai NG, Doi K, Hattori Y, Sakamoto S, N.G. S, K. D, et al. Functional outcome and quality of  
29 life after traumatic total brachial plexus injury treated by nerve transfer or single/double free  
30 muscle transfers: A comparative study. *Bone Jt J.* 2016, 98: 209–17.  
31  
32 [22] Mibu A, Nishigami T, Tanaka K, Osumi M, Tanabe A. Successful Graded Mirror Therapy in a  
33 Patient with Chronic Deafferentation Pain in Whom Traditional Mirror Therapy was  
34 Ineffective: A Case Report. *Pain Pract.* 2016, 16: E62–9.  
35  
36 [23] Azab AA-H, Alsabbahi MS, A.A.-H. A, Azab AA-H, Alsabbahi MS. Bipolar Transfer of Latissimus  
37 Dorsi Myocutaneous Flap for Restoration of Elbow Flexion in Late Traumatic Brachial Plexus  
38 Injury: Evaluation of 13 Cases. *Ann Plast Surg.* 2017, 78: 198–201.  
39  
40 [24] Tsai Y-J, Su F-C, Hsiao C-K, Tu Y-K. Comparison of objective muscle strength in C5-C6 and C5-  
41 C7 brachial plexus injury patients after double nerve transfer. *Microsurgery.* 2015, 35: 107–  
42 14.  
43  
44 [25] Son BC, Ha SW. Phantom Remodeling Effect of Dorsal Root Entry Zone Lesioning in Phantom  
45 Limb Pain Caused by Brachial Plexus Avulsion. *Stereotact Funct Neurosurg* 2015, 93: 240–4.  
46  
47 [26] Hu CH, Chang TN, Lu JC, Laurence VG, Chuang DC. Comparison of Surgical Strategies between  
48 Proximal Nerve Graft and/or Nerve Transfer and Distal Nerve Transfer Based on Functional  
49 Restoration of Elbow Flexion: A Retrospective Review of 147 Patients. *Plast Reconstr Surg.*  
50 2018, 141: 68e-79e.  
51  
52 [27] Ren G, Li R, Xiang D, Yu B. Reconstruction of shoulder abduction by multiple nerve fascicle  
53 transfer through posterior approach. *Injury.* 2013, 44: 492–7.  
54  
55 [28] Xiao C, Lao J, Wang T, Zhao X, Liu J, Gu Y. Intercostal nerve transfer to neurotize the  
56 musculocutaneous nerve after traumatic brachial plexus avulsion: a comparison of two,  
57 three, and four nerve transfers. *J Reconstr Microsurg* 2014, 30: 297–304.  
58  
59 [29] Resnik L, Fantini C, Latlief G, Phillips S, Sasson N, Sepulveda E, et al. Use of the DEKA Arm for  
60

10

## Supplementary file 3. Included Studies

- 1  
2  
3 amputees with brachial plexus injury: A case series. *PLoS One*. 2017, 12: e0178642.
- 4  
5 [30] Leechavengvongs S, Jiamton C, Uerpairojkit C, Malungpaishorpe K, Witoonchart K, Poonotoke  
6 P, et al. Polyester tape scapulopexy for chronic upper extremity brachial plexus injury. *J Hand  
7 Surg Am*. 2015, 40:1184
- 8  
9 [31] Wang S, Li P, Xue Y, Yiu H, Li YC, Wang H. Contralateral C7 nerve transfer with direct  
10 coaptation to restore lower trunk function after traumatic brachial plexus avulsion. *J Bone  
11 Joint Surg Am*. 2013, 95: 821–2.
- 12  
13 [32] Dodakundi C, Doi K, Hattori Y, Sakamoto S, Fujihara Y, Takagi T, et al. Outcome of surgical  
14 reconstruction after traumatic total brachial plexus palsy. *J Bone Joint Surg Am*. 2013,  
15 95:1505–12.
- 16  
17 [33] Aszmann OC, Roche AD, Salminger S, Paternostro-Sluga T, Herceg M, Sturma A, et al. Bionic  
18 reconstruction to restore hand function after brachial plexus injury: a case series of three  
19 patients. *Lancet*. 2015, 385: 2183–9.
- 20  
21 [34] Tsymbaliuk VI, Tretiak IB. [Surgical treatment of the plexus brachialis injury using long-lasting  
22 electrostimulation]. *Klin Khirurgiia*. 2013, 59–61.
- 23  
24 [35] Flores LP, Socolovsky M. Phrenic Nerve Transfer for Reconstruction of Elbow Extension in  
25 Severe Brachial Plexus Injuries. *J Reconstr Microsurg*. 2016, 32: 546–50.
- 26  
27 [36] Wang S, Li P, Xue Y, Zou J, Li W, Li Y. Direct Coaptation of the Phrenic Nerve With the  
28 Posterior Division of the Lower Trunk to Restore Finger and Elbow Extension Function in  
29 Patients With Total Brachial Plexus Injuries. *Neurosurgery*. 2016, 78: 208–14.
- 30  
31 [37] Martins RS, Siqueira MG, Heise CO, Foroni L, Teixeira MJ. A prospective study comparing  
32 single and double fascicular transfer to restore elbow flexion after brachial plexus injury.  
33 *Neurosurgery*. 2013, 72: 709–15.
- 34  
35 [38] Stevanato G, Devigili G, Eleopra R, Fontana P, Lettieri C, Baracco C, et al. Chronic post-  
36 traumatic neuropathic pain of brachial plexus and upper limb: a new technique of peripheral  
37 nerve stimulation. *Neurosurg Rev*. 2014, 37: 473–9.
- 38  
39 [39] Wei W, Alimujiang-Abulaiti, Tuerxunjiang-Dadihan, Meihua S, Yafei L, Chunxiao Y, et al.  
40 [EFFECTIVENESS OF CONTRALATERAL C7 NERVE ROOT AND MULTIPLE NERVES TRANSFER FOR  
41 TREATMENT OF BRACHIAL PLEXUS ROOT AVULSION]. *Zhongguo Xiu Fu Chong Jian Wai Ke Za  
42 Zhi*. 2014, 28: 737–40.
- 43  
44 [40] Plate JF, Ely LK, Pulley BR, Smith BP, Li Z. Combined proximal nerve graft and distal nerve  
45 transfer for a posterior cord brachial plexus injury. *J Neurosurg*. 2013, 118: 155–9.
- 46  
47 [41] Maldonado AA, Kircher MF, Spinner RJ, Bishop AT, Shin AY. The role of elective amputation in  
48 patients with traumatic brachial plexus injury. *J Plast Reconstr Aesthetic Surg*. 2016, 69:311–  
49 7.
- 50  
51 [42] Liu Y, Wang W, Regmi AM, Ahemaitijiang-Yusufu. Early microsurgical management of  
52 clavicular fracture combined with brachial plexus injury. *Zhongguo Xiu Fu Chong Jian Wai Ke  
53 Za Zhi*. 2014a,28: 1329–32.
- 54  
55 [43] Elhassan BT, Wagner ER, Spinner RJ, Bishop AT, Shin AY. Contralateral Trapezius Transfer to  
56 Restore Shoulder External Rotation Following Adult Brachial Plexus Injury. *J Hand Surg Am*.  
57 2016, 41: e45-51.
- 58  
59 [44] Liu Y, Lao J, Gao K, Gu Y, Zhao X. Comparative study of phrenic nerve transfers with and  
60

## Supplementary file 3. Included Studies

- without nerve graft for elbow flexion after global brachial plexus injury. *Injury*. 2014b, 45: 227–31.
- [45] Wang J-P, Rancy SK, Lee SK, Feinberg JH, Wolfe SW. Shoulder and Elbow Recovery at 2 and 11 Years Following Brachial Plexus Reconstruction. *J Hand Surg Am*. 2016, 41:173–9.
- [46] Aras Y, Aydoseli A, Sabanci PA, Akcakaya MO, Alkir G, Imer M. Functional outcomes after treatment of traumatic brachial plexus injuries: clinical study. *Ulus Travma Acil Cerrahi Derg*. 2013, 19: 521–8.
- [47] Soldado F, Bertelli J, F. S. Free gracilis transfer reinnervated by the nerve to the supinator for the reconstruction of finger and thumb extension in longstanding C7-T1 brachial plexus root avulsion. *J Hand Surg Am*. 2013, 38: 941–6.
- [48] Zhang C-G, Dong Z, Gu Y-D. Restoration of hand function in C7-T1 brachial plexus palsies using a staged approach with nerve and tendon transfer. *J Neurosurg*. 2014, 121: 1264–70.
- [49] Dy CJ, Kitay A, Garg R, Kang L, Feinberg JH, Wolfe SW, et al. Neurotization to innervate the deltoid and biceps: 3 Cases. *J Hand Surg Am*. 2013, 38:237–40.
- [50] Lenoir H, Williams T, Griffart A, Lazerges C, Chammas M, Coulet B, et al. Arthroscopic arthrodesis of the shoulder in brachial plexus palsy. *J Shoulder Elb Surg*. 2017, 26: e115–21.
- [51] Gao K, Lao J, Zhao X, Gu Y. Outcome of contralateral C7 nerve transferring to median nerve. *Chin Med J (Engl)*. 2013, 126: 3865–8.
- [52] Cho AB, Iamaguchi RB, Silva GB, Paulos RG, Kiyohara LY, Sorrenti L, et al. Intercostal nerve transfer to the biceps motor branch in complete traumatic brachial plexus injuries. *Microsurgery*. 2015, 35: 428–31.
- [53] Sano Y, Wake N, Ichinose A, Osumi M, Oya R, Sumitani M, et al. Tactile feedback for relief of deafferentation pain using virtual reality system: a pilot study. *J Neuroeng Rehabil*. 2016, 13:61.
- [54] Yang Y, Yang J-T, Fu G, Li X-M, Qin B-G, Hou Y, et al. Functioning free gracilis transfer to reconstruct elbow flexion and quality of life in global brachial plexus injured patients. *Sci Rep*. 2016, 6: 22479.
- [55] Baltzer HL, Wagner ER, Kircher MF, Spinner RJ, Bishop AT, Shin AY, et al. Evaluation of infraspinatus reinnervation and function following spinal accessory nerve to suprascapular nerve transfer in adult traumatic brachial plexus injuries. *Microsurgery*. 2017, 37: 365–70.
- [56] Hu S, Chu B, Song J, Chen L. Anatomic study of the intercostal nerve transfer to the suprascapular nerve and a case report. *J Hand Surg Eur*. 2014, 39: 194–8.
- [57] Kostas-Agnantis I, Korompilias A, Vekris M, Lykissas M, Gkiatas I, Mitsionis G, et al. Shoulder abduction and external rotation restoration with nerve transfer. *Injury*. 2013, 44: 299–304.
- [58] Bhatia A, Doshi P, Koul A, Shah V, Brown JM, Salama M, et al. Contralateral C-7 transfer: is direct repair really superior to grafting? *Neurosurg Focus*. 2017, 43: E3.
- [59] Kita Y, Tajiri Y, Hoshikawa S, Hara Y, Iijima J. Impact of phrenic nerve paralysis on the surgical outcome of intercostal nerve transfer. *Hand Surg*. 2015, 20: 47–52.
- [60] Hou Y, Yang J, Yang Y, Qin B, Fu G, Li X, et al. Flow-through anastomosis using a T-shaped vascular pedicle for gracilis functioning free muscle transplantation in brachial plexus injury. *Clinics (Sao Paulo)*. 2015, 70: 544–9.

## Supplementary file 3. Included Studies

- 1  
2  
3 [61] Sechachalam S, O'Byrne A, MacQuillan A. Free Functional Muscle Transfer Tendon Insertion  
4 Secondary Advancement Procedure to Improve Elbow Flexion. *Tech Hand Up Extrem Surg.*  
5 2017, 21: 8–12.  
6  
7 [62] Chu B, Wang H, Chen L, Gu Y, Hu S. Dual Nerve Transfers for Restoration of Shoulder Function  
8 After Brachial Plexus Avulsion Injury. *Ann Plast Surg.* 2016, 76: 668–73.  
9  
10 [63] Bhat DI, Indira Devi B, Bharti K, Panda R. Cortical plasticity after brachial plexus injury and  
11 repair: a resting-state functional MRI study. *Neurosurg Focus.* 2017, 42: E14.  
12  
13 [64] Bertelli JA, Ghizoni MF, J.A. B. Results of spinal accessory to suprascapular nerve transfer in  
14 110 patients with complete palsy of the brachial plexus. *J Neurosurg Spine.* 2016, 24: 990–5.  
15  
16 [65] Frueh FS, Ho M, Schiller A, Ducommun P, Manoliu A, Andreisek G, et al. Magnetic Resonance  
17 Neurographic and Clinical Long-Term Results After Oberlin's Transfer for Adult Brachial Plexus  
18 Injuries. *Ann Plast Surg.* 2017, 78: 67–72.  
19  
20 [66] Maldonado AA, Kircher MF, Spinner RJ, Bishop AT, Shin AY. Free Functioning Gracilis Muscle  
21 Transfer versus Intercostal Nerve Transfer to Musculocutaneous Nerve for Restoration of  
22 Elbow Flexion after Traumatic Adult Brachial Pan-Plexus Injury. *Plast Reconstr Surg.* 2016,  
23 138: 483e-488e.  
24  
25 [67] Bertelli JA, Ghizoni MF, Tacca CP. Results of wrist extension reconstruction in C5-8 brachial  
26 plexus palsy by transferring the pronator quadratus motor branch to the extensor carpi  
27 radialis brevis muscle. *J Neurosurg.* 2016, 124: 1442–9.  
28  
29 [68] Nicoson MC, Franco MJ, Tung TH. Donor nerve sources in free functional gracilis muscle  
30 transfer for elbow flexion in adult brachial plexus injury. *Microsurgery.* 2017, 37: 377–82.  
31  
32 [69] Bhandari PS, Deb P. Use of contralateral spinal accessory nerve for ipsilateral suprascapular  
33 neurotization in global brachial plexus injury: A new technique. *J Neurosurg Spine.* 2016, 24:  
34 186–8.  
35  
36 [70] Maricq C, Jeunehomme M, Mouraux D, Remy P, Brassinne E, Bahm J, et al. Objective  
37 evaluation of elbow flexion strength and fatigability after nerve transfer in adult traumatic  
38 upper brachial plexus injuries. *Hand Surg.* 2014, 19: 335–41.  
39  
40 [71] DeGeorge B, Becker H, Faryna J, Spinner R, Bishop A. Outcomes of brachialis muscle transfer  
41 to restore finger flexion in traumatic lower trunk brachial plexus palsy. *J Hand Surg Am.* 2017,  
42 42: S33–4.  
43  
44 [72] Liu Y, Lao J, Gao K, Gu Y, Zhao X. Functional outcome of nerve transfers for traumatic global  
45 brachial plexus avulsion. *Injury.* 2013, 44:655–60.  
46  
47 [73] Bertelli JA, Ghizoni MF. Transfer of a flexor digitorum superficialis motor branch for wrist  
48 extension reconstruction in C5-C8 root injuries of the brachial plexus: a case series.  
49 *Microsurgery.* 2013, 33:39–42.  
50  
51 [74] Gao K, Lao J, Zhao X, Gu Y. Outcome after transfer of intercostal nerves to the nerve of triceps  
52 long head in 25 adult patients with total brachial plexus root avulsion injury. *J Neurosurg*  
53 2013, 118: 606–10.  
54  
55 [75] Foroni L, Siqueira MG, Martins RS, Heise CO, Sterman HN, Imamura AY. Good sensory  
56 recovery of the hand in brachial plexus surgery using the intercostobrachial nerve as the  
57 donor. *Arq Neuropsiquiatr.* 2017, 75: 796–800.  
58  
59 [76] Socolovsky M, di Masi G, Bonilla G, Dominguez Paez M, Robla J, Calvache Cabrera C, et al. The  
60

## Supplementary file 3. Included Studies

- phrenic nerve as a donor for brachial plexus injuries: is it safe and effective? Case series and literature analysis. *Acta Neurochir (Wien)*. 2015, 157: 1077–86.
- [77] Hattori Y, Doi K, Sakamoto S, Satbhai NG. Complete avulsion of brachial plexus with associated vascular trauma: feasibility of reconstruction using the double free muscle technique. *Plast Reconstr Surg*. 2013, 132: 1504–12.
- [78] Kachramanoglou C, Carlstedt T, Koltzenburg M, Choi D, C. K, T. C, et al. Long-Term Outcome of Brachial Plexus Reimplantation After Complete Brachial Plexus Avulsion Injury. *World Neurosurg*. 2017, 103: 28–36.
- [79] Kodama N, Doi K, Hattori Y. Force recovery assessment of functioning free muscle transfers using ultrasonography. *J Hand Surg Am*. 2014, 39: 2269–76.
- [80] Goubier J, Teboul F. Rhomboid nerve transfer to the suprascapular nerve for shoulder reanimation in brachial plexus palsy: A clinical report. *Hand Surg Rehabil*. 2016, 35: 363–6.
- [81] Gao K, Lao J, Zhao X, Gu Y. Outcome of contralateral C7 transfer to two recipient nerves in 22 patients with the total brachial plexus avulsion injury. *Microsurgery*. 2013, 33: 605–11.
- [82] Liu Y, Lao J, Zhao X. Comparative study of phrenic and intercostal nerve transfers for elbow flexion after global brachial plexus injury. *Injury*. 2015, 46: 671–5.
- [83] Li XM, Yang JT, Hou Y, Yang Y, Qin BG, Fu G, et al. Donor-side morbidity after contralateral C-7 nerve transfer: results at a minimum of 6 months after surgery. *J Neurosurg*. 2016, 124: 1434–41.
- [84] Rasulic L, Savic A, Zivkovic B, Vitosevic F, Micovic M, Bascarevic V, et al. Outcome after brachial plexus injury surgery and impact on quality of life. *Acta Neurochir (Wien)* 2017, 159: 1257–64.
- [85] Yang J, Jia X, Yu C, Gu Y. Pronator teres branch transfer to the anterior interosseous nerve for treating C8T1 brachial plexus avulsion: An anatomic study and case report. *Neurosurgery*. 2014, 75: 375–9.
- [86] Stiasny J, Birkeland P, J. S. Operative treatment with nerve repair can restore function in patients with traction injuries in the brachial plexus. *Dan Med J*. 2015, 62.
- [87] Soldado F, Ghizoni MF, Bertelli J, F. S, M.F. G. Thoracodorsal nerve transfer for triceps reinnervation in partial brachial plexus injuries. *Microsurgery*. 2016, 36: 191–7.
- [88] Thakkar UG, Vanikar A V, Trivedi HL. Co-infusion of autologous adipose tissue derived neuronal differentiated mesenchymal stem cells and bone marrow derived hematopoietic stem cells, a viable therapy for post-traumatic brachial plexus injury: a case report. *Biomed J*. 2014, 37: 237–40.
- [89] Emamhadi M, Alijani B, Andalib S, M. E, B. A. Long-term clinical outcomes of spinal accessory nerve transfer to the suprascapular nerve in patients with brachial plexus palsy. *Acta Neurochir (Wien)*. 2016, 158: 1801–6.
- [90] Tu YK, Tsai YJ, Chang CH, Su FC, Hsiao CK, Tan JS. Surgical treatment for total root avulsion type brachial plexus injuries by neurotization: a prospective comparison study between total and hemicontralateral C7 nerve root transfer. *Microsurgery*. 2014, 34: 91–101.
- [91] Qiu YQ, Hua XY, Zuo CT, Li T, Zheng MX, Shen YD, et al. Deactivation of distant pain-related regions induced by 20-day rTMS: a case study of one-week pain relief for long-term intractable deafferentation pain. *Pain Physician*. 2014, 17: E99–105.



## Supplementary file 3. Included Studies

- 1  
2  
3 [92] Haninec P, Mencl L, Kaiser R. End-to-side neurorrhaphy in brachial plexus reconstruction. *J*  
4 *Neurosurg.* 2013, 119: 689–94.  
5  
6 [93] Flores LP. Reanimation of elbow extension with medial pectoral nerve transfer in partial  
7 injuries to the brachial plexus. *J Neurosurg.* 2013, 118: 588–93.  
8  
9 [94] Mohammad-Reda A. Early post-operative results after repair of traumatic brachial plexus  
10 palsy. *Turk Neurosurg.* 2013, 23: 1–9.  
11  
12 [95] van der Lingen MAJ, de Joode SGJ, Schotanus MGM, Grimm B, van Nie FA, Speth LAWM, et  
13 al. Satisfied patients after shoulder arthrodesis for brachial plexus lesions even after 20 years  
14 of follow-up. *Eur J Orthop Surg Traumatol.* 2018, 28: 1089–94  
15  
16 [96] Klika BJ, Spinner RJ, Bishop AT, Kircher MF, Shin AY. Posterior branch of the axillary nerve  
17 transfer to the lateral triceps branch for restoration of elbow extension: case report. *J Hand*  
18 *Surg Am.* 2013, 38: 1145–9.  
19  
20 [97] Liu J, Wang X, Zhang S, Wang L, Xia D, Gao Q, et al. A clinical analysis of repairing the whole  
21 brachial plexus nerve root avulsion by transferring C7 nerve root from the uninjured side. *J*  
22 *Neurol Sci.* 2014, 31: 521–31.  
23  
24 [98] Cambon-Binder A, Walch A, Marchei P, Belkheyar Z. Bipolar transfer of the pectoralis major  
25 muscle for restoration of elbow flexion in 29 cases. *J Shoulder Elb Surg.* 2018, 27: e330-e336  
26  
27 [99] Soldado F, Ghizoni MF, Bertelli J. Thoracodorsal nerve transfer for elbow flexion  
28 reconstruction in infraclavicular brachial plexus injuries. *J Hand Surg Am.* 2014, 39: 1766–70.  
29  
30 [100] Cho A, Paulos R, De Resende M, Kiyohara L, Sorrenti L, Wei TH, et al. Median nerve fascicle  
31 transfer versus ulnar nerve fascicle transfer to the biceps motor branch in C5-C6 and C5-C7  
32 brachial plexus injuries: Nonrandomized prospective study of 23 consecutive patients.  
33 *Microsurgery.* 2014, 34: 511–5.  
34  
35 [101] Kaizawa Y, Kakinoki R, Ohta S, Noguchi T. Free functional muscle transplantation of an  
36 anomalous femoral adductor with a very large muscle belly: A case report. *J Brachial Plex*  
37 *Peripher Nerve Inj.* 2013, 8: 11.  
38  
39 [102] Tuohuti T, Yu Q, Yang J, Wang T. Selective neurotization of the radial nerve in the axilla using  
40 intercostal nerve to treat complete brachial plexus palsy. *Int J Clin Exp Med.* 2016, 9: 22880–  
41 5.  
42  
43 [103] Flores LP. Objective Predictors of Functional Recovery Associated with Intercostal Nerves  
44 Transfer for Triceps Reinnervation in Global Brachial Plexus Palsy. *Brazilian Neurosurg* 2016,  
45 35: 271–8.  
46  
47 [104] Emamhadi M. Nerve transfer to relieve pain in upper brachial plexus injuries: Does it work?  
48 *Clin Neurol Neurosurg.* 2017,163: 67–70.  
49  
50 [105] Abdixbir A, Li P, Ilhamjan U, Exmetjan Y. Phrenic nerve transfer versus intercostal nerve  
51 transfer for the repair of brachial plexus root avulsion injuries. *Chinese J Tissue Eng Res.* 2016,  
52 20: 7660–5.  
53  
54 [106] Limthongthang R, Vathana T, Wongtrakul S, Songcharoen P. End-to-Side Neurorrhaphy to  
55 Restore Elbow Flexion in Brachial Plexus Injury. *J Med Assoc Thai.* 2016, 99: 1203–8.  
56  
57 [107] De Oliveira C, Da Silva Melo D, Mestriner R, De Menezes M, Da Silva Filho I, Da Silva J.  
58 Chordata method combined with electrotherapy in functional recovery after brachial plexus  
59 injury: Report of three clinical cases. *Sci Med (Porto Alegre).* 2016, 26: 22425.  
60

## Supplementary file 3. Included Studies

- 1  
2  
3 [108] Xu B, Dong Z, Zhang C-G, Gu Y-D. Clinical outcome following transfer of the supinator motor  
4 branch to the posterior interosseous nerve in patients with C7-T1 brachial plexus palsy. *J*  
5 *Reconstr Microsurg*. 2015, 31: 102–6.  
6  
7 [109] Wu X, Cong XB, Huang QS, Ai FX, Liu YT, Lu XC, et al. Transposition of branches of radial nerve  
8 innervating supinator to posterior interosseous nerve for functional reconstruction of finger  
9 and thumb extension in 4 patients with middle and lower trunk root avulsion injuries of  
10 brachial plexus. *J Huazhong Univ Sci Technolog Med Sci*. 2017, 37: 933–7.  
11  
12 [110] Kazamel M, Sorenson EJ. Electromyographic Findings in Gracilis Muscle Grafts Used to  
13 Augment Elbow Flexion in Traumatic Brachial Plexopathy. *J Clin Neurophysiol*. 2016. 33:549–  
14 53.  
15  
16 [111] Li Z, Reynolds M, Satteson E, Nazir O, Petit J, Smith BP. Double Distal Intraneural Fascicular  
17 Nerve Transfers for Lower Brachial Plexus Injuries. *J Hand Surg Am*. 2016, 41: e15-9.  
18  
19 [112] Arnal M, Cambon A, Marcheix P. Restoration of elbow and hand function in total brachial  
20 plexus palsy with intercostal nerves and C5 root neurotization. Results in 21 patients. *Hand*  
21 *Surg Rehabil*. 2016, 35: 283–7.  
22  
23 [113] Jiang Y, Lao J. The phrenic nerve transfer in the treatment of a septuagenarian with brachial  
24 plexus avulsion injury: a case report. *Int J Neurosci*. 2018, 128: 467–71.  
25  
26 [114] Flores LP. Outcomes of Transferring a Healthy Motor Fascicle From the Radial Nerve to a  
27 Branch for the Triceps to Recover Elbow Extension in Partial Brachial Plexus Palsy.  
28 *Neurosurgery*. 2017, 80: 448–53.  
29  
30 [115] Johnsen PH, Wolfe SW. Successful Nerve Transfers for Traumatic Brachial Plexus Palsy in a  
31 Septuagenarian: A Case Report. *Hand (N Y)*. 2016, 11: NP30–3.  
32  
33 [116] Maldonado AA, Romero-Brufau S, Kircher MF, Spinner RJ, Bishop AT, Shin AY. Free  
34 Functioning Gracilis Muscle Transfer for Elbow Flexion Reconstruction after Traumatic Adult  
35 Brachial Pan-Plexus Injury: Where Is the Optimal Distal Tendon Attachment for Elbow  
36 Flexion?. *Plast Reconstr Surg*. 2017, 139: 128–36.  
37  
38 [117] Bhandari PS. Results of Distal Nerve Transfers in Restoration of Shoulder Function in C5 and  
39 C6 Root Avulsion Injury to the Brachial Plexus. *Indian J Neurotrauma* 2017, 14: 21–5.  
40  
41 [118] Watanabe M, Yamamoto T, Fukaya C, Obuchi T, Kano T, Kobayashi K, et al. Bipolar dual-lead  
42 spinal cord stimulation between two electrodes on the ventral and dorsal sides of the spinal  
43 cord: consideration of putative mechanisms. *Acta Neurochir (Wien)*. 2018, 160: 639–43.  
44  
45 [119] Al-Qattan M, Kattan A, Al-Qahtany B, Al-Qattan O. Triceps nerve to deltoid nerve transfer  
46 after an unsatisfactory intra-plexus neurotization of the posterior division of the upper trunk.  
47 *Int J Surg Case Rep*. 2017, 37: 124–6.  
48  
49 [120] Alrabai H, Gesheff G, Hammouda A, Conway J. Trapezius Muscle Transfer for Restoration of  
50 Elbow Extension in a Traumatic Brachial Plexus Injury. *J Hand Surg Am*. 2018, 43: 872.  
51  
52 [121] Bertelli JA. Transfer of the radial nerve branch to the extensor carpi radialis brevis to the  
53 anterior interosseous nerve to reconstruct thumb and finger flexion. *J Hand Surg Am*. 2015,  
54 40: 323-328.  
55  
56 [122] Magistrini E, Ciclamini D, Panero B. Ultrasound-guided pulse-dose radiofrequency:  
57 Treatment of neuropathic pain after brachial plexus lesion and arm revascularization. *Case*  
58 *Rep Med*. 2014, 201:429618.  
59  
60

## Supplementary file 3. Included Studies

- 1  
2  
3 [123] Liu Y, Xu X, Zou Y, Li S, Zhang B. Phrenic nerve transfer to the musculocutaneous nerve for the  
4 repair of brachial plexus injury: Electrophysiological characteristics. *Neural Regen Res.* 2015,  
5 10: 328–33.  
6  
7 [124] Le Hanneur M, Walch A, Gerosa T, Grandjean A, Masmajeun E. Postoperative motor deficits  
8 following elbow flexion reanimation by nerve transfer. *Hand Surg Rehabil* 2018, 37: 289-294  
9  
10 [125] Liu Y, Zhuang Y, Yu H, Xiong H. Comparative study of phrenic and partial ulnar nerve transfers  
11 for elbow flexion after upper brachial plexus avulsion: A retrospective clinical analysis. *J Plast*  
12 *Reconstr Aesthetic Surg.* 2018, 71: 1245–51.  
13  
14 [126] Yavari M, Mahmoudvand H, Nadri S. Contralateral medial pectoral nerve transfer with free  
15 gracilis muscle transfer in old brachial plexus palsy. *J Surg Res.* 2018, 231: 94–8.  
16  
17 [127] Yanagisawa T, Fukuma R, Seymour B, Hosomi K, Kishima H, Shimizu T, et al. MEG-BMI to  
18 control phantom limb pain. *Neurol Med Chir (Tokyo).* 2018, 58: 327–33.  
19  
20 [128] Choong C, Shalimar A. Complete brachial plexus injury - An amputation dilemma. A case  
21 report. *Malaysian Orthop J.* 2015, 9: 52–4.  
22  
23 [129] Tsao J, Finn S. Reversal of phantom pain and hand-to-face remapping after brachial plexus  
24 avulsion. *Ann Clin Transl Neurol.* 2016, 3: 463–4.  
25  
26 [130] Kubota S, Hara Y, Shimizu Y, Kadone H, Kubo T, Marushima A, et al. A newly developed upper  
27 limb single-joint HAL in a patient with elbow flexion reconstruction after traumatic brachial  
28 plexus injury: A case report. *Interdiscip Neurosurg Adv Tech Case Manag.* 2017, 10: 66–8.  
29  
30 [131] Bertelli JA. Free Reverse Gracilis Muscle Combined With Steindler Flexorplasty for Elbow  
31 Flexion Reconstruction After Failed Primary Repair of Extended Upper-Type Paralysis of the  
32 Brachial Plexus. *J Hand Surg Am.* 2019, 44: 112-120  
33  
34 [132] Xu B, Dong Z, Zhang C. Multiple nerve and tendon transfers: A new strategy for restoring  
35 hand function in a patient with C7-T1 brachial plexus avulsions. *J Neurosurg.* 2017, 127: 837–  
36 42.  
37  
38  
39  
40  
41  
42  
43  
44  
45  
46  
47  
48  
49  
50  
51  
52  
53  
54  
55  
56  
57  
58  
59  
60

**Supplementary file 4: Unique outcomes mapped to potential domains and core areas according to COMET**

**Online Supplementary file 4. Table: Unique outcomes mapped to potential domains and core areas according to COMET(Dodd et al., 2018)**

| Outcomes ( n=157)                  | Subdomains                    | Domains                                      | Core Areas             |
|------------------------------------|-------------------------------|----------------------------------------------|------------------------|
| Isometric muscle strength          | Muscle strength/function      | Musculoskeletal and connective tissue domain | Physiological/Clinical |
| Concentric strength                |                               |                                              |                        |
| Eccentric strength                 |                               |                                              |                        |
| Muscle flicker/contraction         |                               |                                              |                        |
| Anti-gravity muscle activity       |                               |                                              |                        |
| Muscle endurance                   |                               |                                              |                        |
| Muscle fatigue                     |                               |                                              |                        |
| Muscle torque                      |                               |                                              |                        |
| Active range of movement           | Active movement               |                                              |                        |
| Perception of movement             |                               |                                              |                        |
| Antigravity movement               |                               |                                              |                        |
| Independent movement without donor |                               |                                              |                        |
| Passive range of movement          | Passive movement              |                                              |                        |
| Movement control/stability         | Control of movement/stability |                                              |                        |
| Muscle mass                        | Muscle mass                   |                                              |                        |
| Bony union                         | Bone structure/position       |                                              |                        |
| Joint position                     |                               |                                              |                        |
| Joint stability                    |                               |                                              |                        |
| General sensory recovery           | General sensory recovery      | Nervous system                               |                        |
| Feeling of numbness                |                               |                                              |                        |
| Proprioception                     |                               |                                              |                        |
| Light touch                        | Discriminative touch          |                                              |                        |
| 2 PD                               |                               |                                              |                        |

1

**Supplementary file 4: Unique outcomes mapped to potential domains and core areas according to COMET**

|                                                 |                                         |                                     |  |
|-------------------------------------------------|-----------------------------------------|-------------------------------------|--|
| Vibration                                       |                                         |                                     |  |
| Object recognition                              |                                         |                                     |  |
| Pain                                            | Protective touch                        |                                     |  |
| Temperature                                     |                                         |                                     |  |
| Deep pressure                                   |                                         |                                     |  |
| Brachial plexus structure                       |                                         | Peripheral nervous system structure |  |
| Level of reinnervation                          | Reinnervation                           |                                     |  |
| Time to reinnervation                           |                                         |                                     |  |
| Progression of regeneration                     | Progression of regeneration             |                                     |  |
| Speed of motor sensory conduction               | Speed of motor and sensory conduction   |                                     |  |
| Pain intensity                                  | Pain intensity/relief                   | General outcomes/symptoms           |  |
| Pain relief / reduction                         |                                         |                                     |  |
| Pain duration                                   | Pain duration/frequency                 |                                     |  |
| Pain frequency                                  |                                         |                                     |  |
| Pain quality                                    | Pain quality and interference with life |                                     |  |
| Pain interference with walking                  |                                         |                                     |  |
| Pain interference in mood                       |                                         |                                     |  |
| Pain interference with work                     |                                         |                                     |  |
| Pain interference in activities of daily living |                                         |                                     |  |
| Pain interference with relationships            |                                         |                                     |  |
| Pain interference with enjoyment of life        |                                         |                                     |  |
| Pain interference with sleep                    |                                         |                                     |  |
| Sensitivity to cold                             | Pain when arm exposed to cold           |                                     |  |
| Paraesthesia                                    | Paraesthesia and itchiness              |                                     |  |
| Itchiness                                       |                                         |                                     |  |

**Supplementary file 4: Unique outcomes mapped to potential domains and core areas according to COMET**

|                                      |                                                       |                      |             |
|--------------------------------------|-------------------------------------------------------|----------------------|-------------|
| Sensitivity to pressure              | Sensitivity to touch, pressure etc                    |                      |             |
| Sensitivity to touch                 |                                                       |                      |             |
| Pain location                        | Location of pain                                      |                      |             |
| Pain relief from medication          | Pain medication use                                   |                      |             |
| Stiffness                            | Stiffness                                             |                      |             |
| Impact on general sleep              | Impact on sleep                                       |                      |             |
| Impact on sleep on affected side     |                                                       |                      |             |
| Frequency sleep disturbed by injury  |                                                       |                      |             |
| General physical function            | Physical function non-specific                        | Physical functioning | Life Impact |
| Patient led functional outcome       | Lower limb and non -upper limb function               |                      |             |
| Walking short distance               |                                                       |                      |             |
| Balance                              |                                                       |                      |             |
| Running                              |                                                       |                      |             |
| Climbing stairs                      |                                                       |                      |             |
| Bending                              |                                                       |                      |             |
| Kneeling                             | Reaching, pulling, pushing, carrying etc              |                      |             |
| Reaching                             |                                                       |                      |             |
| Pulling                              |                                                       |                      |             |
| Pushing                              |                                                       |                      |             |
| Carrying                             |                                                       |                      |             |
| Throwing                             |                                                       |                      |             |
| Lifting                              | Turning twisting, gripping and releasing with the arm |                      |             |
| General function of arm              |                                                       |                      |             |
| Turning and twisting arm             |                                                       |                      |             |
| Grip and release                     | Fine hand movement including writing                  |                      |             |
| Pinching                             |                                                       |                      |             |
| Fine hand movement (writing/buttons) | Impact on paid or unpaid work or role in education    |                      |             |
| Returning to work                    |                                                       |                      |             |
| Ability to do work                   |                                                       |                      |             |
| Usual time at work                   |                                                       |                      |             |
| Type of work                         |                                                       |                      |             |

**Supplementary file 4: Unique outcomes mapped to potential domains and core areas according to COMET**

|                                                            |                                                                                     |                              |  |
|------------------------------------------------------------|-------------------------------------------------------------------------------------|------------------------------|--|
| Usual school activities                                    |                                                                                     |                              |  |
| General rating to perform a patient specific activity      | Role function - patient specific                                                    |                              |  |
| Impact on ADL (general)                                    | Carrying out daily routine, (including food preparation, housework, garden, plants) |                              |  |
| Return to ADL (general)                                    |                                                                                     |                              |  |
| Impact on food preparation and feeding                     |                                                                                     |                              |  |
| Housework (washing, cleaning, ironing, folding, vacuuming) |                                                                                     |                              |  |
| Gardening (Includes indoor plants)                         |                                                                                     |                              |  |
| Using a phone                                              |                                                                                     |                              |  |
| Maintaining personal hygiene                               |                                                                                     |                              |  |
| Maintaining personal appearance (grooming hair)            |                                                                                     | Maintaining personal hygiene |  |
| Dressing                                                   | Maintaining personal appearance                                                     |                              |  |
| Transport needs (e.g driving)                              | Dressing                                                                            |                              |  |
| Impact on normal hobbies                                   | Transport needs                                                                     |                              |  |
| Time doing normal hobbies                                  | Impact on recreational activities and sport                                         |                              |  |
| Playing instrument in usual way                            |                                                                                     |                              |  |
| Ability to play instrument                                 |                                                                                     |                              |  |
| Impact on time spent playing instrument                    |                                                                                     |                              |  |
| Impact on time spent doing sport                           |                                                                                     |                              |  |
| Impact on participation in sport                           |                                                                                     |                              |  |
| Social activities with friends                             | Effect on relationship with                                                         | Social functioning           |  |

**Supplementary file 4: Unique outcomes mapped to potential domains and core areas according to COMET**

|                                              |                                        |                       |                  |                                           |
|----------------------------------------------|----------------------------------------|-----------------------|------------------|-------------------------------------------|
| Social activities with neighbours            | family, friends, neighbours and groups |                       |                  |                                           |
| Social activities with family                |                                        |                       |                  |                                           |
| Social activities with groups                |                                        |                       |                  |                                           |
| Dependence on family and friends             |                                        |                       |                  |                                           |
| Appearance interferes with social activities |                                        |                       |                  |                                           |
| Intimate relationships                       | Effect on intimate relationships       | Emotional functioning |                  |                                           |
| Emotional impact on work                     | Emotional distress/mood                |                       |                  |                                           |
| Energy levels                                |                                        |                       |                  |                                           |
| Emotional impact on ADL                      |                                        |                       |                  |                                           |
| Happiness                                    |                                        |                       |                  |                                           |
| Impact on life enjoyment / satisfaction      |                                        |                       |                  |                                           |
| Emotional impact on relationships            |                                        |                       |                  |                                           |
| Anxiety                                      |                                        |                       |                  |                                           |
| Depression                                   |                                        |                       |                  |                                           |
| Acceptance/ Adjustment                       |                                        |                       |                  | Thoughts and beliefs (acceptance, coping) |
| Coping with trauma                           |                                        |                       |                  |                                           |
| Confidence                                   |                                        |                       |                  |                                           |
| Self esteem                                  |                                        |                       |                  |                                           |
| Body image                                   |                                        |                       |                  | Body image                                |
| Quality of life                              |                                        |                       |                  | Quality of Life                           |
| Rating of health                             | Perceived Health status                | Health status         | Health status    |                                           |
| General patient satisfaction                 | Patient satisfaction                   | Delivery of Care      | Delivery of Care |                                           |
| Satisfaction with appearance of arm          |                                        |                       |                  |                                           |
| Satisfaction with function                   |                                        |                       |                  |                                           |
| Satisfaction with movement                   |                                        |                       |                  |                                           |
| Satisfaction with strength                   |                                        |                       |                  |                                           |



**Supplementary file 4: Unique outcomes mapped to potential domains and core areas according to COMET**

|                              |                                                     |                |                |
|------------------------------|-----------------------------------------------------|----------------|----------------|
| Satisfaction with pain       |                                                     |                |                |
| Satisfaction with colour     |                                                     |                |                |
| Satisfaction with shape      |                                                     |                |                |
| Satisfaction with feeling    |                                                     |                |                |
| Satisfaction with procedure  |                                                     |                |                |
| Patient preference           | Patient preference                                  |                |                |
| Quality of intervention      | Accessibility, quality and adequacy of intervention |                |                |
| Time to surgery              | Time to surgery                                     |                |                |
| Operation time               | Operation time                                      | Resource Use   | Resource Use   |
| Motor morbidity              | Donor site morbidity                                | Adverse Events | Adverse Events |
| Sensory morbidity            |                                                     |                |                |
| Pain                         |                                                     |                |                |
| General complications        | General complications                               |                |                |
| Pneumothorax                 | Respiratory complications                           |                |                |
| Respiratory function         |                                                     |                |                |
| Respiratory symptoms         |                                                     |                |                |
| Pneumonia                    |                                                     |                |                |
| Arterial thrombosis          | Vascular complications                              |                |                |
| Venous thrombosis            |                                                     |                |                |
| Haematoma                    |                                                     |                |                |
| Venous spasm                 |                                                     |                |                |
| Iatrogenic vascular injury   |                                                     |                |                |
| Vascularity of flap          |                                                     |                |                |
| Swelling                     |                                                     |                |                |
| Fracture                     | Musculoskeletal complications                       |                |                |
| Passive range of motion loss |                                                     |                |                |
| Co-contraction               |                                                     |                |                |
| Bowstringing                 |                                                     |                |                |
| Failure of tendon attachment |                                                     |                |                |
| Joint Instability            |                                                     |                |                |
| Scapula crepitus             |                                                     |                |                |

**Supplementary file 4: Unique outcomes mapped to potential domains and core areas according to COMET**

|                         |                         |  |  |
|-------------------------|-------------------------|--|--|
| Infection complications | Infection complications |  |  |
|-------------------------|-------------------------|--|--|

Dodd, S. et al. A taxonomy has been developed for outcomes in medical research to help improve knowledge discovery. *Journal of clinical epidemiology*. 2018, 96: 84–92.

For peer review only

Supplementary file 5. Measurement of outcomes and measurement tools used

Supplementary file 5. Measurement of outcomes and measurement tools used

56 outcome subdomains in 4 core areas (Physiological/clinical, Life Impact, Resource Use and Adverse events) and within the following COMET domains

Musculoskeletal/connective tissue, Nervous system outcome domain, General outcome and symptom domain, Physical functioning, Role functioning, Emotional functioning, Global quality of life, Perceived health status, Delivery of care, Hospital resources and Adverse Events

| Core Area               | Outcome subdomains                       | Measurement type used (N) |                            |                     |           | Measurement instruments used ( number of studies )                                                                                                                                                                                                                                                                                                                                                                                                                                                                                                                                                                                                                                                                                                                                                                |
|-------------------------|------------------------------------------|---------------------------|----------------------------|---------------------|-----------|-------------------------------------------------------------------------------------------------------------------------------------------------------------------------------------------------------------------------------------------------------------------------------------------------------------------------------------------------------------------------------------------------------------------------------------------------------------------------------------------------------------------------------------------------------------------------------------------------------------------------------------------------------------------------------------------------------------------------------------------------------------------------------------------------------------------|
|                         |                                          | Patient reported Outcome  | Clinician reported Outcome | Performance Outcome | Not Clear |                                                                                                                                                                                                                                                                                                                                                                                                                                                                                                                                                                                                                                                                                                                                                                                                                   |
| PHYSIOLOGICAL /CLINICAL | <b>Musculoskeletal/connective tissue</b> |                           |                            |                     |           |                                                                                                                                                                                                                                                                                                                                                                                                                                                                                                                                                                                                                                                                                                                                                                                                                   |
|                         | Muscle strength                          | 30                        | 129                        | 19                  | 3         | DASH (n= 27), UEFI (n=2), MHQ (n=1),<br><br><b>Manual Muscle Testing</b><br><b>Manual muscle testing undefined (n=5)</b><br><b>MRC muscle grading (n=61 , including UCLA)</b><br><b>MRC muscle grading modified (n= 22),</b><br><i>MRC modified</i> , unclear how (n= 5)<br><i>MRC modified</i> , grade 3 active must equal passive (n=2)<br><i>MRC modified</i> , grade 2 active must equal passive movement ( n=2)<br><i>MRC modified</i> , M3+ contraction with resistance against a finger for less than 30 seconds, M4 contraction of resistance against a finger against a finger for more than 30 seconds (n=1)<br><i>MRC modified</i> : M0, M1+, M1, M1+, M2-, M2, M2+,M3-, M3, M3+, M4-, M4, M4+, M5-, M5 ( n=6)<br><i>MRC modified</i> , Finger flexion tested with wrist extended 20-30 degrees ( n=1) |

## Supplementary file 5. Measurement of outcomes and measurement tools used

|  |  |  |  |  |                                                                                                                                                                                                                                                                                                                                                                                                                                                                                                                                                                                                                                                                                                                                                                                                                                                                                                                                                                                                                                                                                                                                                                                                                                                                                                                                                                                                                                                                                                                                                                                                                                                                                                                                                                 |
|--|--|--|--|--|-----------------------------------------------------------------------------------------------------------------------------------------------------------------------------------------------------------------------------------------------------------------------------------------------------------------------------------------------------------------------------------------------------------------------------------------------------------------------------------------------------------------------------------------------------------------------------------------------------------------------------------------------------------------------------------------------------------------------------------------------------------------------------------------------------------------------------------------------------------------------------------------------------------------------------------------------------------------------------------------------------------------------------------------------------------------------------------------------------------------------------------------------------------------------------------------------------------------------------------------------------------------------------------------------------------------------------------------------------------------------------------------------------------------------------------------------------------------------------------------------------------------------------------------------------------------------------------------------------------------------------------------------------------------------------------------------------------------------------------------------------------------|
|  |  |  |  |  | <p><i>MRC modified</i>, Addition of M4.5 ( n=1)</p> <p><i>MRC modified</i>, graded two muscles together (n=1)</p> <p><i>MRC modified</i>, finger extension tested with wrist extension at 20-30 degrees ( n=1)</p> <p><i>MRC modified</i>, summated muscle score (n=1)</p> <p><i>MRC modified</i>, FDS tested by stabilising LF and IF to table and testing MF and RF IP flexion (n=1)</p> <p><b>Other manual muscle tests ( n=3)</b></p> <p>Kendall and McCreary testing procedure (n=1)</p> <p>Oxford muscle testing (n=1)</p> <p>Modification of the Louisiana State University Medical Centre grading system (n=1)</p> <p><b>Time to (n= 12)</b></p> <p>contraction (n=7); M2 ( n=1); strength greater than or equal to M3 (n=1); M 3 (n=1); greater than or equal to modified M3 ( n=1); Time to improvement in MRC scale (n= 1)</p> <p><b>Dynanometry (n=23)</b></p> <p>Dynanometry – isokinetic machine, undefined method (n =1)</p> <p>Grip strength JAMAR , undefined method (n=4); Hook grip – isokinetic machine, undefined method (n=1); Grip strength JAMAR, mean of 3 trials n=2); Grip strength , PABLO system, undefined (n=1); Pinch grip, JAMAR, undefined (n= 3), Pinch grip JAMAR, mean 3 trials (n= 1); Peak isometric, hand held dynamometer (n=2); Isometric strength , hand held dynamometer, best of 3 trials (n=1); Isometric strength , Kendall &amp; Kendall positions, 3 trials mean value (n=1); Measurement on digital scales after 5 seconds (n=1)</p> <p>Concentric strength through range, Isokinetics (n=1)</p> <p>Eccentric strength through range, isokinetics (n=1)</p> <p>Combined action of using elbow and hand on digital hanging scale (n=1)</p> <p>Constant-Murley score: dynanometry 90 degrees abduction(n=2)</p> |
|--|--|--|--|--|-----------------------------------------------------------------------------------------------------------------------------------------------------------------------------------------------------------------------------------------------------------------------------------------------------------------------------------------------------------------------------------------------------------------------------------------------------------------------------------------------------------------------------------------------------------------------------------------------------------------------------------------------------------------------------------------------------------------------------------------------------------------------------------------------------------------------------------------------------------------------------------------------------------------------------------------------------------------------------------------------------------------------------------------------------------------------------------------------------------------------------------------------------------------------------------------------------------------------------------------------------------------------------------------------------------------------------------------------------------------------------------------------------------------------------------------------------------------------------------------------------------------------------------------------------------------------------------------------------------------------------------------------------------------------------------------------------------------------------------------------------------------|

Supplementary file 5. Measurement of outcomes and measurement tools used

1  
2  
3  
4  
5  
6  
7  
8  
9  
10  
11  
12  
13  
14  
15  
16  
17  
18  
19  
20  
21  
22  
23  
24  
25  
26  
27  
28  
29  
30  
31  
32  
33  
34  
35  
36  
37  
38  
39  
40  
41  
42  
43  
44  
45  
46

For peer review only

|  |  |  |  |  |                                                                                                                                                                                                                                                                                                                                                                                                                                                                                                                                                                                                                                                                                                                                                                                                                                                                                                                                                                                                                                                                                                                                                                                                                              |
|--|--|--|--|--|------------------------------------------------------------------------------------------------------------------------------------------------------------------------------------------------------------------------------------------------------------------------------------------------------------------------------------------------------------------------------------------------------------------------------------------------------------------------------------------------------------------------------------------------------------------------------------------------------------------------------------------------------------------------------------------------------------------------------------------------------------------------------------------------------------------------------------------------------------------------------------------------------------------------------------------------------------------------------------------------------------------------------------------------------------------------------------------------------------------------------------------------------------------------------------------------------------------------------|
|  |  |  |  |  | <p><b>Narakas score modified (one study)</b><br/>         Thoaraco brachial grasp (n=1)<br/>         Elbow flexion with weight (n=1)<br/>         Elbow extension with weight (n=1)<br/>         Wrist flexion with weight (n=1)<br/>         Wrist extension with weight(n=1)<br/>         Fist power with weight (n=1)<br/>         Pinch power (n=1)</p> <p><b>ULM (one study)</b><br/>         Shoulder flexion to shoulder height with 500g (n=1)<br/>         Shoulder flexion above shoulder height with 500g (n=1)<br/>         Shoulder flexion above shoulder with 1kg (n=1)<br/>         Move weight on table (100g) (n=1)<br/>         Move weight on table (500g) (n=1)<br/>         Move weight on table (1KG) (n=1)</p> <p><b>SHAP (one study)</b><br/>         Grip strength (n=1)<br/>         Pinch strength (n=1)<br/>         Pinch grip (lateral) (n=1)<br/>         Pinch grip (tip) (n=1)<br/>         Grip strength (power) (n=1)<br/>         Heavy extension (n=1)</p> <p>Ability to lift weight, undefined (n=1)<br/>         Number of repetitions movement can be performed in 10 seconds (n=1)<br/>         Maximum weight sustained when flexing elbow (n=1)</p> <p><b>Unclear (n= 3)</b></p> |
|--|--|--|--|--|------------------------------------------------------------------------------------------------------------------------------------------------------------------------------------------------------------------------------------------------------------------------------------------------------------------------------------------------------------------------------------------------------------------------------------------------------------------------------------------------------------------------------------------------------------------------------------------------------------------------------------------------------------------------------------------------------------------------------------------------------------------------------------------------------------------------------------------------------------------------------------------------------------------------------------------------------------------------------------------------------------------------------------------------------------------------------------------------------------------------------------------------------------------------------------------------------------------------------|

## Supplementary file 5. Measurement of outcomes and measurement tools used

|                                                                                             |   |     |   |    |  |                                                                                                                                                                                                                                                                                                                                                                                                                                                                  |
|---------------------------------------------------------------------------------------------|---|-----|---|----|--|------------------------------------------------------------------------------------------------------------------------------------------------------------------------------------------------------------------------------------------------------------------------------------------------------------------------------------------------------------------------------------------------------------------------------------------------------------------|
|                                                                                             |   |     |   |    |  | Force recovery: Cross sectional area of the muscle under isometric contraction divided by cross sectional area at rest (n=1)                                                                                                                                                                                                                                                                                                                                     |
| Active movement                                                                             | 5 | 103 | 3 | 63 |  | SST(n=1), MHQ (n=1), UCLA shoulder rating scale (n=1), MPI(n=2), CONSTANT- MURLEY(n=2) (2xPRO, 8x ClinRO), ARAT (PerfO, n=1), ULM (PerfO, n=2), Goniometry(n=48), Visual assessment (n=32), First web space in cm (n=3), Total active movement(n=2), Pulp to palm distance (n=2) Months to full active movement (n=1) Months to antigravity movement (n=3) Months to initial movement (n= 1) Months to independent movement without donor (n=1) Not clear (n=63) |
| Passive range of movement                                                                   |   | 6   |   | 7  |  | Not defined (n=7), Goniometry(n=6)                                                                                                                                                                                                                                                                                                                                                                                                                               |
| Movement control and stability                                                              |   | 1   | 1 | 2  |  | MPI (ClinRo, n=1), ULM (PerfO, n=1), Not clear (n=2)                                                                                                                                                                                                                                                                                                                                                                                                             |
| Bone structure/position/healing                                                             |   |     |   | 4  |  | Not clear (n=4)                                                                                                                                                                                                                                                                                                                                                                                                                                                  |
| Muscle mass                                                                                 |   |     |   | 4  |  | Not clear(n=4)                                                                                                                                                                                                                                                                                                                                                                                                                                                   |
| <b>Nervous system outcome subdomains</b>                                                    |   |     |   |    |  |                                                                                                                                                                                                                                                                                                                                                                                                                                                                  |
| General sensory recovery including proprioception                                           |   | 9   |   | 8  |  | Sensory BMRC (n=5), Modified Sensory BMRC (n= 2), Highet classification(n=2), Not clear (n=8)                                                                                                                                                                                                                                                                                                                                                                    |
| Discriminative touch (light touch, two point discrimination, vibration, object recognition) | 1 | 14  |   |    |  | MHQ (n=1), Cotton wool (n=3), Semmes Weinstein Monofilaments (n=4), Two point discrimination( n=2), Tuning fork (n=4), Not defined (ClinRo, n=1)                                                                                                                                                                                                                                                                                                                 |
| Protective touch (pain, temperature, deep pressure)                                         |   | 3   |   | 7  |  | Blunt pin (n=3), Not clear (n=7)                                                                                                                                                                                                                                                                                                                                                                                                                                 |
| Structure of peripheral nervous system                                                      |   | 1   |   |    |  | MRI (n=1)                                                                                                                                                                                                                                                                                                                                                                                                                                                        |
| Reinnervation (level of reinnervation, time to innervation)                                 |   | 54  |   |    |  | Two point scale on EMG(n=1) Four point scale on EMG (n=4), Not clear EMG (n= 49)                                                                                                                                                                                                                                                                                                                                                                                 |
| Progression of regeneration                                                                 |   | 5   |   |    |  | Tinel sign (n=5)                                                                                                                                                                                                                                                                                                                                                                                                                                                 |
| Speed of motor and sensory conduction                                                       |   | 9   |   |    |  | EMG (n=9)                                                                                                                                                                                                                                                                                                                                                                                                                                                        |
| <b>General outcomes / symptoms</b>                                                          |   |     |   |    |  |                                                                                                                                                                                                                                                                                                                                                                                                                                                                  |

## Supplementary file 5. Measurement of outcomes and measurement tools used

|                                |                                                                                |    |   |   |           |                                                                                                                                                                                                                                                                                             |
|--------------------------------|--------------------------------------------------------------------------------|----|---|---|-----------|---------------------------------------------------------------------------------------------------------------------------------------------------------------------------------------------------------------------------------------------------------------------------------------------|
|                                | Pain intensity/ relief                                                         | 73 |   |   | 3         | DASH (n=27), ASES (n=1), TAPES (n=1), VAS(n=18), NRS(n=12),MHQ (n=1) WBFERS(n=1), BPI (n= 1), UNWNS (n=1), McGill Pain Questionnaire SF (n=2), McGill pain questionnaire (n= 1), MPI (n=1), CONSTANT-MURLEY (n=2), 4 point scale (n=3) Author developed questionnaire(n=1), Not Clear (n=3) |
|                                | Pain duration or frequency                                                     | 12 | 0 | 0 | 0         | SST (n=1), SF36 (n=5), MHQ (n=1),TAPES(n=1), NPSI (n=1), BPI (n= 1), UCLA shoulder rating score (n=1), Not described PRO (n=1)                                                                                                                                                              |
|                                | Pain quality                                                                   | 7  |   |   |           | TAPES (n= 1), NPSI(n=1), UWNS(n= 1), McGill SF(n=2), McGill (n=1), Non described PRO (n =1)                                                                                                                                                                                                 |
|                                | Pain when arm exposed to cold                                                  | 1  |   |   |           | NPSI (n=1)                                                                                                                                                                                                                                                                                  |
|                                | Paraesthesia                                                                   | 27 |   |   |           | DASH (n=27)                                                                                                                                                                                                                                                                                 |
|                                | Sensitivity to touch, pressure, vibration etc                                  | 3  |   |   |           | NPSI (n=1) UWNS (n= 1), NRS (n=1)                                                                                                                                                                                                                                                           |
|                                | Location of pain                                                               | 1  |   |   |           | BPI (n=1)                                                                                                                                                                                                                                                                                   |
|                                | Pain medication use                                                            | 1  |   |   |           | BPI(n=1)                                                                                                                                                                                                                                                                                    |
|                                | Stiffness                                                                      | 27 |   |   |           | DASH (n=27)                                                                                                                                                                                                                                                                                 |
| <b>LIFE IMPACT</b>             | <b>Physical functioning</b>                                                    |    |   |   |           |                                                                                                                                                                                                                                                                                             |
|                                | Physical function non-specific                                                 | 2  |   |   |           | PSFS (n=1), TAPES (n=1)                                                                                                                                                                                                                                                                     |
|                                | Lower limb and non-upper limb function (walking, running, climbing stairs etc) | 7  |   |   | 1         | SF36 (n=5), TAPES (n= 1), BPI (n=1) Non described PRO (n=1)                                                                                                                                                                                                                                 |
|                                | Reaching, pulling, pushing, carrying, throwing , lifting                       | 37 |   | 3 |           | DASH (n=27), UEFI (n=2), MHQ(n=1), ASES(n=1), SST (n=1), SF36(n=5), ARAT(n=1), AMULA ( n=1) UNBtP ( n=1)                                                                                                                                                                                    |
|                                | Turning twisting, gripping and releasing with the arm                          | 30 |   | 5 | 1         | DASH (n=27), UEFI (n=2), MHQ (n=1),ARAT(n=1),SHAP(n= 1), JHFT (n=1), AMULA (n=1), UNBtP (n=1), Not clear (n=1)                                                                                                                                                                              |
|                                | Fine hand movement include writing                                             | 30 |   | 6 |           | DASH (n=27), UEFI (n=2), MHQ (n=1),ARAT(n=1), SHAP(n=1), JHFT (n=1) Purdue Peg test (n=1),AMULA (n=1), UNBtP (n=1)                                                                                                                                                                          |
|                                | <b>Role Functioning</b>                                                        |    |   |   |           |                                                                                                                                                                                                                                                                                             |
|                                | Impact on return to work                                                       | 41 |   |   |           | DASH (n =27), UEFI (n=2),MHQ (n=1), ASES (n=1), SST (n=1), SF36 (n=5), TAPES (n=1), MPI (n=1) No description PRO (n=1), Questionnaire no data ( n=1)                                                                                                                                        |
| Role function patient specific | 1                                                                              |    |   |   | PSFS(n=1) |                                                                                                                                                                                                                                                                                             |

## Supplementary file 5. Measurement of outcomes and measurement tools used

|                                                                                     |    |   |   |  |                                                                                                                                                                                                                          |
|-------------------------------------------------------------------------------------|----|---|---|--|--------------------------------------------------------------------------------------------------------------------------------------------------------------------------------------------------------------------------|
| Carrying out daily routine, (including food preparation, housework, garden, plants) | 36 | 1 | 5 |  | DASH (n=27), UEFI (n=2), MHQ (n=1), TAPES(n=1), BPI (n=1), UCLA (n=1), SHAP (n=1), Jebsen (n=1), ULM (n=1)<br>Questionnaire not defined (n=2), No description PRO (n=1)<br>Unclear CLinRO(n=1), AMULA (n=1), UNBtP (n=1) |
| Maintaining personal hygiene                                                        | 35 |   | 2 |  | DASH (n=27), ASES (n=1), SST(n=1), SF36(n=5), MHQ(n=1)<br>AMULA (n=1), UNBtP (n=1)                                                                                                                                       |
| Maintaining personal appearance                                                     | 3  |   | 1 |  | UEFI (n=2), ASES (n= 1), AMULA (n=1)                                                                                                                                                                                     |
| Dressing                                                                            | 32 |   | 2 |  | DASH (n =27), UEFI (n=2), MHQ (n=1), ASES (n= 1), SST (n=1),<br>AMULA (n=1) SHAP(n=1)                                                                                                                                    |
| Transport needs                                                                     | 29 |   |   |  | DASH (n =27), UEFI (n=2),                                                                                                                                                                                                |
| Impact on recreational activities and sport                                         | 34 |   |   |  | DASH (n =27), UEFI (n=2), ASES (n= 1), TAPES(n=1), CONSTANT-<br>MURLEY (n=2), Not described PRO (n=1)                                                                                                                    |
| <b>Social functioning</b>                                                           |    |   |   |  |                                                                                                                                                                                                                          |
| Effect on relationship with family, friends, neighbours and groups                  | 34 |   |   |  | DASH (n =27), SF36 (n=5), TAPES (n=1), MHQ (n=1)                                                                                                                                                                         |
| Effect on intimate relationships                                                    | 27 |   |   |  | DASH (n =27)                                                                                                                                                                                                             |
| <b>Emotional Functioning</b>                                                        |    |   |   |  |                                                                                                                                                                                                                          |
| Emotional distress/ mood                                                            | 11 |   |   |  | SF36 (n=5), TAPES (n= 1), BPI(n=1), UWNS(n=1), Self-rated<br>anxiety scale (n=1), Self-rated depression scale (n=1), MHQ<br>(n=1)                                                                                        |
| Thoughts and beliefs ( acceptance and adjustment)                                   | 1  |   |   |  | TAPES (n=1)                                                                                                                                                                                                              |
| Self-esteem and self confidence                                                     | 28 |   |   |  | DASH (n=27), TAPES(n= 1)                                                                                                                                                                                                 |
| Body image                                                                          | 3  |   |   |  | MHQ (n= 2), Not described (n=1)                                                                                                                                                                                          |
| <b>Sleep and overall health</b>                                                     |    |   |   |  |                                                                                                                                                                                                                          |
| Impact on sleep                                                                     | 37 |   |   |  | DASH (n=27), UEFI (n=3), ASES(n= 1), MHQ (n=1), SST (n=1),<br>BPI(n=1), CONSTANT- MURLEY(n=2), Not described PRO (n=1)                                                                                                   |
| <b>General Quality of life</b>                                                      | 1  |   |   |  | Not described PRO (n=1)                                                                                                                                                                                                  |
| <b>Perceived Health Status</b>                                                      | 6  |   |   |  | SF36 (n=5), TAPES (n=1)                                                                                                                                                                                                  |
| <b>Delivery of Care</b>                                                             |    |   |   |  |                                                                                                                                                                                                                          |
| Patient satisfaction                                                                | 10 |   |   |  | TAPES (n=1), UCLA (n=1), MHQ (n=1), 10-point scale (n=1)                                                                                                                                                                 |



Supplementary file 5. Measurement of outcomes and measurement tools used

|                 |                                                     |   |    |  |    |                                                                                                          |
|-----------------|-----------------------------------------------------|---|----|--|----|----------------------------------------------------------------------------------------------------------|
|                 |                                                     |   |    |  |    | 4 point scale (n=2), 3 point likert scale (n=1), Questionnaire not described (n=1), Not defined PRO(n=2) |
|                 | Patient preference for treatment                    | 1 |    |  |    | Not described (n=1)                                                                                      |
|                 | Accessibility, quality and adequacy of intervention |   |    |  | 1  | 4 point scale (n=1)                                                                                      |
| <b>RESOURCE</b> | <b>Hospital</b>                                     |   |    |  |    |                                                                                                          |
|                 | Operation time                                      |   |    |  | 1  | Not described (n=1)                                                                                      |
|                 | <b>Adverse Events</b>                               |   |    |  |    |                                                                                                          |
| <b>ADVERSE</b>  | Donor site motor morbidity to include weakness      |   | 18 |  | 19 | BMRC (n=7), BMRC modified(n=2), Dynanometry (n=8), EMG(n=1)<br>Not clear (n=19)                          |
|                 | Donor site sensory morbidity                        | 1 | 3  |  | 4  | 10-point scale PRO (n=1)<br>Not defined (n=4), 2PD (n=2), Monofilaments (n=1)                            |
|                 | Donor site morbidity -pain                          | 3 |    |  |    | Not defined PRO (n=3)                                                                                    |

## Supplementary file 5. Measurement of outcomes and measurement tools used

|                               |     |     |    |     |                                                                                          |
|-------------------------------|-----|-----|----|-----|------------------------------------------------------------------------------------------|
| General complications         |     |     |    | 2   | Unclear (n=2)                                                                            |
| Respiratory complications     | 1   | 5   |    | 4   | 4 point scale PRO (n=1), x-ray (n=2), FEV (n=1), TLC(n=1), MVV (n=1), Not defined (n=4), |
| Vascular complications        |     | 2   |    | 13  | Not defined (n=13), Visual assessment (n=1), USS (n=1)                                   |
| Musculoskeletal complications |     | 2   |    | 19  | Not defined CLinRO(n=2), Unclear (n=19)                                                  |
| Infection complications       |     | 1   |    | 2   | Not defined ClinRo(n=1), Unclear (n=2)                                                   |
|                               | 669 | 366 | 46 | 168 |                                                                                          |

*DASH* Disabilities of the arm shoulder and hand, *UEFI* Upper Extremity Functional Index, *MHQ* Michigan Hand Questionnaire, *BMRC* British Medical Research Council, *ULM* Upper Limb Module, *SHAP* Southampton Hand Assessment Procedure, *SST* Simple Shoulder Test, *MPI* Mayo clinic Performance Index for the elbow, *ARAT* Action Research Arm Test, *ClinRO* Clinician Reported Outcome, *Perfo* Performance Outcome, *PRO* Patient Reported Outcome, *ASES* American Shoulder and Elbow Surgeons Index, *TAPES* The Trinity Amputation and Prosthesis Experience Scales, *VAS* Visual Analogue Scale, *NRS* Numerical Rating Scale, *WBFRS* Wong Baker Faces Rating Scale, *UNWNS* University of Washington Neuropathic pain Score, *SF36* Short Form 36 health survey, *NPSI* Neuropathic Pain Symptom Inventory, *BPI* Brief Pain Inventory, *PSFS* Pain Specific Functional Scale, *AMULA* American Measures for Upper Limb Amputees, *UNBPT* University of New Brunswick test of Prosthetics function, *JHFT* Jebsen Hand Function Test, *FEV* Forced Expiratory Volume, *TLC* Tidal Lung Capacity, *MVV* maximal voluntary ventilation, *USS* Ultrasound Scan.

1  
2  
3  
4  
5  
6  
7  
8  
9  
10  
11  
12  
13  
14  
15  
16  
17  
18  
19  
20  
21  
22  
23  
24  
25  
26  
27  
28  
29  
30  
31  
32  
33  
34  
35  
36  
37  
38  
39  
40  
41  
42  
43  
44  
45  
46  
47  
48  
49  
50  
51  
52  
53  
54  
55  
56  
57  
58  
59  
60

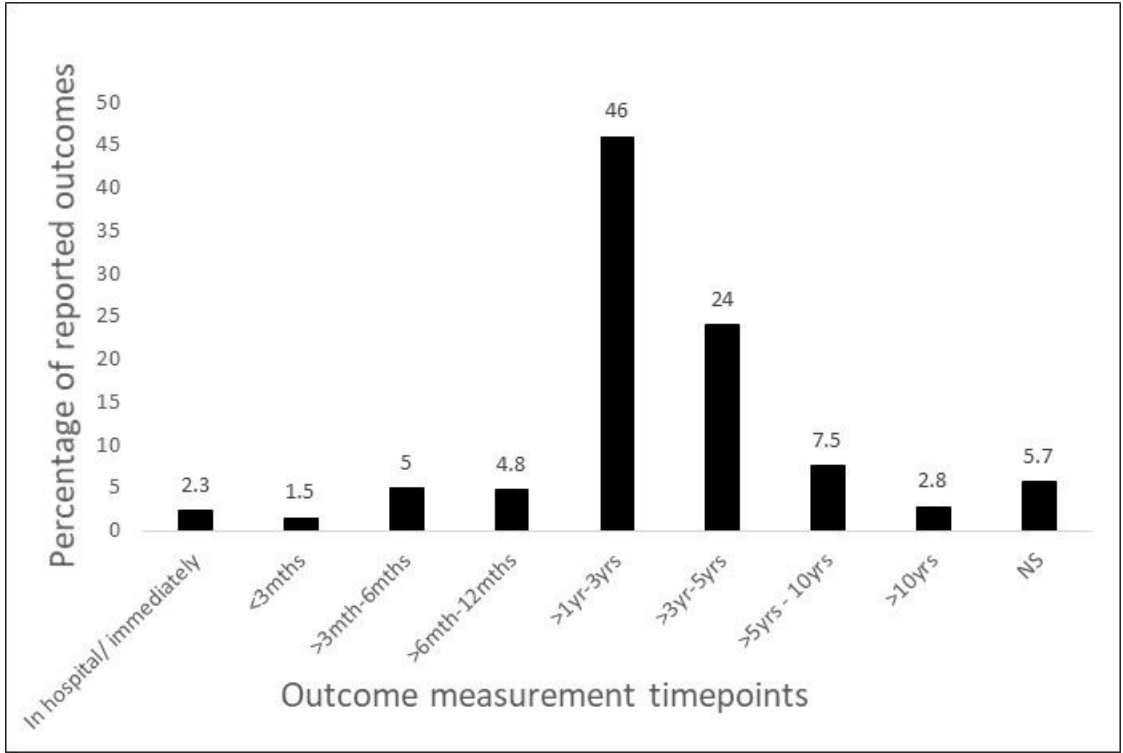

er review only

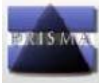

# PRISMA 2009 Checklist

| Section/topic                      | #  | Checklist item                                                                                                                                                                                                                                                                                              | Reported on page # |
|------------------------------------|----|-------------------------------------------------------------------------------------------------------------------------------------------------------------------------------------------------------------------------------------------------------------------------------------------------------------|--------------------|
| <b>TITLE</b>                       |    |                                                                                                                                                                                                                                                                                                             |                    |
| Title                              | 1  | Identify the report as a systematic review, meta-analysis, or both.                                                                                                                                                                                                                                         | 1                  |
| <b>ABSTRACT</b>                    |    |                                                                                                                                                                                                                                                                                                             |                    |
| Structured summary                 | 2  | Provide a structured summary including, as applicable: background; objectives; data sources; study eligibility criteria, participants, and interventions; study appraisal and synthesis methods; results; limitations; conclusions and implications of key findings; systematic review registration number. | 2                  |
| <b>INTRODUCTION</b>                |    |                                                                                                                                                                                                                                                                                                             |                    |
| Rationale                          | 3  | Describe the rationale for the review in the context of what is already known.                                                                                                                                                                                                                              | 3                  |
| Objectives                         | 4  | Provide an explicit statement of questions being addressed with reference to participants, interventions, comparisons, outcomes, and study design (PICOS).                                                                                                                                                  | 4                  |
| <b>METHODS</b>                     |    |                                                                                                                                                                                                                                                                                                             |                    |
| Protocol and registration          | 5  | Indicate if a review protocol exists, if and where it can be accessed (e.g., Web address), and, if available, provide registration information including registration number.                                                                                                                               | 5                  |
| Eligibility criteria               | 6  | Specify study characteristics (e.g., PICOS, length of follow-up) and report characteristics (e.g., years considered, language, publication status) used as criteria for eligibility, giving rationale.                                                                                                      | 7                  |
| Information sources                | 7  | Describe all information sources (e.g., databases with dates of coverage, contact with study authors to identify additional studies) in the search and date last searched.                                                                                                                                  | 5                  |
| Search                             | 8  | Present full electronic search strategy for at least one database, including any limits used, such that it could be repeated.                                                                                                                                                                               | S1                 |
| Study selection                    | 9  | State the process for selecting studies (i.e., screening, eligibility, included in systematic review, and, if applicable, included in the meta-analysis).                                                                                                                                                   | 6                  |
| Data collection process            | 10 | Describe method of data extraction from reports (e.g., piloted forms, independently, in duplicate) and any processes for obtaining and confirming data from investigators.                                                                                                                                  | 8                  |
| Data items                         | 11 | List and define all variables for which data were sought (e.g., PICOS, funding sources) and any assumptions and simplifications made.                                                                                                                                                                       | 8                  |
| Risk of bias in individual studies | 12 | Describe methods used for assessing risk of bias of individual studies (including specification of whether this was done at the study or outcome level), and how this information is to be used in any data synthesis.                                                                                      | 8                  |
| Summary measures                   | 13 | State the principal summary measures (e.g., risk ratio, difference in means).                                                                                                                                                                                                                               | n/a                |
| Synthesis of results               | 14 | Describe the methods of handling data and combining results of studies, if done, including measures of consistency (e.g., I <sup>2</sup> ) for each meta-analysis.                                                                                                                                          | n/a                |

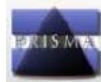

# PRISMA 2009 Checklist

Page 1 of 2

| Section/topic                 | #  | Checklist item                                                                                                                                                                                           | Reported on page # |
|-------------------------------|----|----------------------------------------------------------------------------------------------------------------------------------------------------------------------------------------------------------|--------------------|
| Risk of bias across studies   | 15 | Specify any assessment of risk of bias that may affect the cumulative evidence (e.g., publication bias, selective reporting within studies).                                                             | n/a                |
| Additional analyses           | 16 | Describe methods of additional analyses (e.g., sensitivity or subgroup analyses, meta-regression), if done, indicating which were pre-specified.                                                         | n/a                |
| <b>RESULTS</b>                |    |                                                                                                                                                                                                          |                    |
| Study selection               | 17 | Give numbers of studies screened, assessed for eligibility, and included in the review, with reasons for exclusions at each stage, ideally with a flow diagram.                                          | 7                  |
| Study characteristics         | 18 | For each study, present characteristics for which data were extracted (e.g., study size, PICOS, follow-up period) and provide the citations.                                                             | Table S2           |
| Risk of bias within studies   | 19 | Present data on risk of bias of each study and, if available, any outcome level assessment (see item 12).                                                                                                | n/a                |
| Results of individual studies | 20 | For all outcomes considered (benefits or harms), present, for each study: (a) simple summary data for each intervention group (b) effect estimates and confidence intervals, ideally with a forest plot. | n/a                |
| Synthesis of results          | 21 | Present results of each meta-analysis done, including confidence intervals and measures of consistency.                                                                                                  | n/a                |
| Risk of bias across studies   | 22 | Present results of any assessment of risk of bias across studies (see Item 15).                                                                                                                          | n/a                |
| Additional analysis           | 23 | Give results of additional analyses, if done (e.g., sensitivity or subgroup analyses, meta-regression [see Item 16]).                                                                                    | n/a                |
| <b>DISCUSSION</b>             |    |                                                                                                                                                                                                          |                    |
| Summary of evidence           | 24 | Summarize the main findings including the strength of evidence for each main outcome; consider their relevance to key groups (e.g., healthcare providers, users, and policy makers).                     | 25-26              |
| Limitations                   | 25 | Discuss limitations at study and outcome level (e.g., risk of bias), and at review-level (e.g., incomplete retrieval of identified research, reporting bias).                                            | 27                 |
| Conclusions                   | 26 | Provide a general interpretation of the results in the context of other evidence, and implications for future research.                                                                                  | 30                 |
| <b>FUNDING</b>                |    |                                                                                                                                                                                                          |                    |
| Funding                       | 27 | Describe sources of funding for the systematic review and other support (e.g., supply of data); role of funders for the systematic review.                                                               | Title page         |

From: Moher D, Liberati A, Tetzlaff J, Altman DG, The PRISMA Group (2009). Preferred Reporting Items for Systematic Reviews and Meta-Analyses: The PRISMA Statement. PLoS Med 6(7): e1000097. doi:10.1371/journal.pmed1000097

For more information, visit: [www.prisma-statement.org](http://www.prisma-statement.org).

Page 2 of 2  
For peer review only - <http://bmjopen.bmj.com/site/about/guidelines.xhtml>

# BMJ Open

## Developing a core outcome set for traumatic brachial plexus injuries: a systematic review of outcomes.

|                                 |                                                                                                                                                                                                                                                                                                                                                                                                                                                                                                                                                          |
|---------------------------------|----------------------------------------------------------------------------------------------------------------------------------------------------------------------------------------------------------------------------------------------------------------------------------------------------------------------------------------------------------------------------------------------------------------------------------------------------------------------------------------------------------------------------------------------------------|
| Journal:                        | <i>BMJ Open</i>                                                                                                                                                                                                                                                                                                                                                                                                                                                                                                                                          |
| Manuscript ID                   | bmjopen-2020-044797.R1                                                                                                                                                                                                                                                                                                                                                                                                                                                                                                                                   |
| Article Type:                   | Original research                                                                                                                                                                                                                                                                                                                                                                                                                                                                                                                                        |
| Date Submitted by the Author:   | 07-Dec-2020                                                                                                                                                                                                                                                                                                                                                                                                                                                                                                                                              |
| Complete List of Authors:       | Miller, Caroline; University of East Anglia, School of Health Sciences, The Queens Building ; Queen Elizabeth Hospital Birmingham, Physiotherapy Department<br>cross, jane; University of East anglia, school AHP<br>O'Sullivan, Joel; Queen Elizabeth Hospital Birmingham, Physiotherapy<br>Power, Dominic; Queen Elizabeth Hospital Birmingham, The Birmingham Peripheral Nerve Injury Service<br>Kyte, Derek; University of Birmingham, Institute of Applied Health Research<br>Jerosch-Herold, Christina; University of East Anglia, Health Sciences |
| <b>Primary Subject Heading</b>: | Neurology                                                                                                                                                                                                                                                                                                                                                                                                                                                                                                                                                |
| Secondary Subject Heading:      | Emergency medicine, Rehabilitation medicine, Surgery                                                                                                                                                                                                                                                                                                                                                                                                                                                                                                     |
| Keywords:                       | Neurological injury < NEUROLOGY, Limb reconstruction < ORTHOPAEDIC & TRAUMA SURGERY, Plastic & reconstructive surgery < SURGERY, Neurological pain < NEUROLOGY, Elbow & shoulder < ORTHOPAEDIC & TRAUMA SURGERY, Trauma management < ORTHOPAEDIC & TRAUMA SURGERY                                                                                                                                                                                                                                                                                        |
|                                 |                                                                                                                                                                                                                                                                                                                                                                                                                                                                                                                                                          |

SCHOLARONE™  
Manuscripts



I, the Submitting Author has the right to grant and does grant on behalf of all authors of the Work (as defined in the below author licence), an exclusive licence and/or a non-exclusive licence for contributions from authors who are: i) UK Crown employees; ii) where BMJ has agreed a CC-BY licence shall apply, and/or iii) in accordance with the terms applicable for US Federal Government officers or employees acting as part of their official duties; on a worldwide, perpetual, irrevocable, royalty-free basis to BMJ Publishing Group Ltd ("BMJ") its licensees and where the relevant Journal is co-owned by BMJ to the co-owners of the Journal, to publish the Work in this journal and any other BMJ products and to exploit all rights, as set out in our [licence](#).

The Submitting Author accepts and understands that any supply made under these terms is made by BMJ to the Submitting Author unless you are acting as an employee on behalf of your employer or a postgraduate student of an affiliated institution which is paying any applicable article publishing charge ("APC") for Open Access articles. Where the Submitting Author wishes to make the Work available on an Open Access basis (and intends to pay the relevant APC), the terms of reuse of such Open Access shall be governed by a Creative Commons licence – details of these licences and which [Creative Commons](#) licence will apply to this Work are set out in our licence referred to above.

Other than as permitted in any relevant BMJ Author's Self Archiving Policies, I confirm this Work has not been accepted for publication elsewhere, is not being considered for publication elsewhere and does not duplicate material already published. I confirm all authors consent to publication of this Work and authorise the granting of this licence.

1  
2  
3 1 **Title Page**  
4  
5

6 2  
7  
8

9 3 **Title of article**  
10

11 4 **Developing a core outcome set for traumatic brachial plexus injuries: a**  
12  
13  
14 5 **systematic review of outcomes.**  
16

17 6  
18

19 7  
20

21 8 **Corresponding author**  
22

23 9 Caroline Miller (corresponding author)  
24

25 10 School of Health Sciences,  
26

27 11 University of East Anglia,  
28

29 12 Norwich,  
30

31 13 UK,  
32

33 14 NR4 7TJ  
34

35 15 Tel no: 00447743501508  
36

37 16 Email: [caroline.miller@uea.ac.uk](mailto:caroline.miller@uea.ac.uk)  
38

39 17 Twitter handle: @c\_ahern26  
40

41 18  
42

43 19 **Co-authors**  
44

45 20 **Jane Cross**  
46

47 21 School of Health Sciences,  
48

49 22 University of East Anglia,  
50

51 23 Norwich,  
52

53 24 UK,  
54

55 25 Twitter handle: @JaneCross12  
56

57 26  
58

59 27  
60

28



1  
2  
3 1 **Joel O Sullivan,**  
4  
5 2 Physiotherapy Department,  
6  
7 3 Queen Elizabeth Hospital Birmingham,  
8  
9 4 Birmingham  
10  
11 5 UK,  
12  
13 6 Twitter handle: @jos2305  
14  
15 7

16 8 **Dominic M Power,**  
17  
18 9 The Birmingham Peripheral Nerve Injury Service,  
19  
20 10 Queen Elizabeth Hospital Birmingham,  
21  
22 11 Birmingham,  
23  
24 12 UK,  
25  
26 13 @dominicpower1  
27  
28 14

29  
30 15 **Derek G Kyte,**  
31  
32 16 Centre for Patient-Reported Outcomes Research,  
33  
34 17 University of Birmingham,  
35  
36 18 Birmingham,  
37  
38 19 UK  
39  
40 20

41 21 **Christina Jerosch-Herold,**  
42  
43 22 School of Health Sciences,  
44  
45 23 University of East Anglia,  
46  
47 24 Norwich,  
48  
49 25 UK,  
50  
51 26 Twitter handle: @tinajerosch  
52  
53 27  
54  
55 28

56  
57 29 **Word count, 3,300**  
58  
59 30  
60

## ABSTRACT

**Background** Clinical decisions on treatment for traumatic brachial plexus injuries (TBPI) should be based in best evidence from systematic reviews. However a lack of consistency in outcome reporting has hampered combining study findings. As a first step to developing a Core Outcome Set for TBPI, a systematic review is needed to identify what outcomes have been outcome assessed in traumatic brachial plexus injury research.

**Method** Medline (OVID), EMBASE, CINAHL, and AMED were systematically searched for studies evaluating the clinical effectiveness of interventions in adult traumatic brachial plexus injuries from January 2013 to September 2018. Two authors independently screened papers. All outcomes were extracted verbatim from studies. If a patient reported or performance outcome measure was used then outcomes were extracted directly from the instrument. Variation in outcome reporting was determined by assessing the number of unique outcomes reported across all included studies. Outcomes were categorized into domains using a prespecified taxonomy.

**Results** Verbatim outcomes (n= 1460) were extracted from 132 studies including 30 questionnaires. Unique outcomes (n= 157) were structured into four core areas and 11 domains. Outcomes within the musculoskeletal domain were measured in 87% of studies, physical functioning in 23%, emotional functioning in 22% and adverse events in 33%. One study measured quality of life. We identified 62 different methods for measuring muscle strength, 16 for range of movement and 63 studies did not define how they measured movement.

1  
2  
3 1 **Conclusion** This review of outcome reporting in traumatic brachial plexus injury research  
4  
5 2 demonstrated an impairment focus and heterogeneity. A core outcome set would ensure  
6  
7 3 standardized and relevant outcomes are reported to facilitate future systematic review and  
8  
9 4 meta-analysis.  
10  
11  
12  
13  
14 5

15  
16 6 **Prospero registration number:** CRD42018109843  
17  
18  
19 7

## 20 21 8 **Strengths and limitations of this study**

- 22  
23  
24 9
- 25 • This study is a comprehensive and systematic review of all reported clinical  
26  
27 10 outcomes reported in traumatic brachial plexus studies from 2013- 2018 inclusive.  
28  
29 11
  - 30 • Unique outcomes were systematically categorized into a clear taxonomy to inform  
31  
32 12 the development of a core outcome set.  
33  
34 13
  - 35 • Definition of unique outcomes and categorisation was conducted by researchers and  
36  
37 14 clinicians to account for multidisciplinary perspectives.  
38  
39 15
  - 40 • Quality assessment was not undertaken as the aim of the study was to review  
41  
42 16 outcome reporting and not to synthesize data about effectiveness of interventions.  
43  
44  
45 17  
46  
47 18  
48  
49  
50 19  
51  
52  
53 20  
54  
55  
56 21  
57  
58  
59  
60

1

2

## INTRODUCTION

3 A traumatic brachial plexus injury (TBPI) is a major injury to the brachial plexus. It can result  
4 in significant functional, social, psychological and economic effects, [1,2] with most  
5 occurring in young men as a result of motorbike accidents,[3]. Survival from major trauma is  
6 increasing,[4] and with this an increase in the incidence of TBPI,[5] which accounts for 1.2%  
7 of polytrauma,[6].The complex and chronic nature of the injury is associated with significant  
8 healthcare costs,[7] in addition to indirect costs estimated at up to \$2.34 million (in 2017  
9 dollars) over the lifetime of an manual labourer in the USA with a TBPI,[8]. There are  
10 multiple strategies for managing a patient with a TBPI with recent advancements in nerve  
11 microsurgery,[9] and robotics,[10] resulting in increased treatment options. The choice of  
12 treatment should be made using up-to-date, high quality scientific evidence,[11,12].  
13  
14 Ideally, a meta-analysis would identify the most effective treatment for an individual with a  
15 TBPI, however, such analysis requires homogenous outcome measurement and reporting  
16 across studies to enable optimum synthesis. Indeed, despite increasing numbers of TBPI  
17 studies, outcome heterogeneity and poorly defined outcomes has been highlighted as a  
18 significant challenge to evidence synthesis in two recent systematic reviews,[13,14]. There is  
19 now international agreement that the definition of a core outcome set (COS) for TBPI is a  
20 priority,[15,16]. A COS is a minimum agreed set of outcomes to be reported and measured  
21 in all studies,[17,18]. Development of a COS has been shown to reduce heterogeneity of  
22 outcome reporting in other health conditions, with 81% of trialists in rheumatoid arthritis  
23 (RA) now measuring the COS for RA,[19].

1  
2  
3 1 To date a minimum set of outcomes, important to patients and professionals for reporting  
4  
5 2 in TBPI studies, has not been agreed. The choice of what are important outcomes to  
6  
7  
8 3 measure in TBPI is complex due to patient heterogeneity with different mechanisms,  
9  
10 4 locations and severity of injury. COS methodology is continuously being refined and  
11  
12 5 promoted by the Core Outcome Measures in Effectiveness Trials (COMET) initiative [20].  
13  
14  
15 6 Development of a COS usually begins with identification of a long list of outcomes which is  
16  
17  
18 7 then prioritised through a consensus process. This systematic review sits within the larger  
19  
20 8 global COMBINE project to identify a COS for TBPI. A Delphi study and consensus meeting,  
21  
22 9 informed by data from this systematic review and interviews with people with the injury,  
23  
24  
25 10 will prioritise the final COS for TBPI.  
26  
27  
28  
29

30 12 As a first step in the development of an international COS for TBPI we conducted a  
31  
32 13 systematic review to identify outcomes reported and measurement instruments used and  
33  
34 14 their timing in the literature. The final step of the global project will match the COS to  
35  
36 15 existing validated measurement instruments and make recommendations on when they  
37  
38 16 should be collected, therefore it was necessary to identify currently used instruments and  
39  
40 17 their timepoints also.  
41  
42  
43  
44  
45  
46  
47  
48  
49  
50  
51  
52  
53  
54  
55  
56  
57  
58  
59  
60

1 The aim of this review was to:

- 2 1. Identify what outcome domains are assessed in studies evaluating surgical and non-
- 3 surgical treatment for TBPI.
- 4 2. Compare the definitions of outcomes and time points of outcomes assessed.
- 5 3. Identify how the outcomes were measured, that is what validated or non-validated
- 6 instruments are used.

## 12 METHODS

13 We followed the methods described in the Cochrane Handbook for Systematic Reviews of  
14 Interventions,[21] and report in accordance with the Preferred Reporting Items for  
15 Systematic Reviews and Meta-Analysis (PRISMA) guidelines,[22]. The systematic review  
16 protocol was prospectively registered with PROSPERO (PROSPERO registration number:  
17 CRD42018109843). Deviations from the protocol are reported in supplementary file 1.

### 19 Identification of studies

20 We conducted an electronic search of Medline (OVID), EMBASE (OVID), CINAHL and AMED  
21 on the 18<sup>th</sup> September 2018. Studies published between 01 Jan 2013 and 18 September  
22 2018 were included to reflect outcomes employed in current TBPI care. An example of the  
23 search strategy for Ovid MEDLINE is presented in supplementary file 2. The thesaurus  
24 vocabulary of each database was used to adapt search terms. Boolean operators (AND, OR)  
25 were used to narrow or widen the search and no language restrictions were applied.

## 1 **Study eligibility**

2 Studies were included if they met the following criteria:

3 *Study type:* Any controlled and uncontrolled experimental and observational studies

4 evaluating interventions in traumatic brachial plexus injury including case reports, case

5 series, case studies, prospective and retrospective cohort studies, randomized and non-

6 randomized clinical trials. We excluded conference proceedings, abstract only publications

7 and those not involving human subjects.

8 *Participants:* Studies reporting outcomes in individuals with traumatic brachial plexus injury

9 aged 16 years or over. Studies of patients with obstetric brachial plexus injuries were

10 excluded.

11 *Interventions:* Any surgical or non-surgical intervention for TBPI.

12 *Outcomes:* All outcomes reported in the published abstract, methods or results. These

13 included physiological and functional outcomes, adverse events and patient reported

14 outcomes (PROs) either reported in the study or subsequently extrapolated from the PRO

15 instruments.

16 *Language:* Non-English language publications were included

17

## 18 **Study selection process**

19 The reference management software Mendeley was used to compile the literature, with

20 duplicates removed. Authors (X and X) independently screened the titles and then the

21 abstracts against the eligibility criteria. Disagreements were discussed and a third reviewer

22 (x) was involved where required. Studies appearing to meet the inclusion criteria based on

23 title and abstract were retrieved as full text articles, and were read to assess for eligibility

24 with decisions on inclusion and exclusion recorded (Figure 1. PRISMA flow diagram).

1  
2  
3 1 Disagreements in study selection were resolved by discussion within the research team (x, x,  
4  
5  
6 2 x).

7  
8 3

9  
10 4

11  
12 5

13  
14 6

15  
16 7

17  
18 8

### 19 9 **Quality assessment**

20  
21  
22 10 Quality assessment of studies was not relevant as the objective was to systematically  
23  
24 11 document all outcomes reported in TBPI studies rather than synthesize the data about  
25  
26 12 intervention effectiveness.

27  
28  
29 13

### 30 31 14 **Data Extraction**

32  
33  
34 15 Data were extracted into a piloted data extraction sheet (Microsoft Excel). General data  
35  
36 16 extracted from each study included author, study design, recruiting country, publication  
37  
38 17 year, number of participants, gender, mean age, level of TBPI and intervention tested. The  
39  
40 18 following information was extracted regarding outcomes: each outcome reported  
41  
42 19 (verbatim), area of body assessed if relevant (shoulder, elbow, wrist or hand), method of  
43  
44 20 administration, name of measure, timepoints of measure and reported complications. The  
45  
46 21 number of outcomes per study was also documented.

47  
48  
49 22

50  
51  
52  
53 23 Data extraction was performed independently by X and X for the first 20% of included  
54  
55 24 studies. These were compared, and disagreements discussed and resolved through debate  
56  
57 25 or discussion with a third reviewer (X). Following this a further ten percent of studies had



1  
2  
3 1 data extracted by both X and X. Due to the high level of agreement between reviewers (  
4  
5 2 91% agreement) on outcomes extracted, at this stage, the remaining studies underwent  
6  
7  
8 3 extraction by a single reviewer (X).  
9

10 4  
11  
12  
13 5 Where a validated PRO or performance outcome measurement was used and composed  
14  
15 6 of multiple items, the following data was extracted by the first author: verbatim name of  
16  
17 7 the instrument, verbatim wording for each individual item. A performance outcome  
18  
19 8 measurement was defined as “A measurement based on a standardized task performed by  
20  
21 9 a patient that is administered and evaluated by an appropriately trained individual or is  
22  
23 10 independently completed” [23]. The frequency of use of instruments was noted and  
24  
25 11 compared between studies. The instruments were categorized as: (i) General Health  
26  
27 12 (generic - for use with any patient); (ii) Upper limb physical function (region-specific); (iii)  
28  
29 13 Symptom or domain specific (to assess a single symptom e.g. pain) and (iv) Condition  
30  
31 14 Specific. Timepoints of measurement of all outcomes were noted. If the outcome was  
32  
33 15 assessed at different timepoints then all timings were recorded.  
34  
35  
36  
37  
38  
39  
40  
41  
42

### 43 17 **Classification of outcomes into domains and defining unique outcomes**

44  
45 18 Identically worded and spelled verbatim outcomes were removed at this stage. Identical  
46  
47 19 outcomes measured over different time points were noted as one outcome. Where  
48  
49 20 outcomes were assessed using an instrument containing several items, each individual item  
50  
51 21 was assigned an outcome name using the International Classification of Functioning and  
52  
53 22 following standard linking rules,[24].  
54  
55  
56  
57  
58  
59  
60

1 X categorized all outcomes into an outcome taxonomy developed by COMET for  
2 categorizing outcomes for core outcome set development,[25]. These included 5 core areas  
3 and 38 outcome domains. This is presented in supplementary file 3. A long list of all  
4 categorized outcomes was presented to researchers (X and X) at a face to face meeting  
5 where the categorization of all outcomes was reviewed using the recommended taxonomy.  
6 Subdomains were created within the larger taxonomy to manage the large variation in TBPI  
7 clinical outcomes extracted. Disagreements not resolved at this stage were discussed  
8 further with subject experts (for example, the Adverse Event domain was discussed with a  
9 surgeon).

10 Due to the diversity in terminology used to report outcomes, we grouped similar outcomes  
11 within each subdomain. It is recommended that outcomes with different words, phrasing,  
12 or spelling addressing the same concept should be categorized as a unique outcome,[26].  
13 For example, active range of motion of shoulder abduction and active goniometry of  
14 shoulder abduction were named as active shoulder abduction range and grasp strength and  
15 grip strength were named as grip strength. Independent meetings were held with four  
16 subject experts to ratify and define unique outcome names within each domain.

### 17 **Patient and Public Involvement**

18 The need for a COS in TBPI care was conceived following discussions with patients and  
19 health professionals. Patients highlighted the diverse effect the injury has on their life and  
20 that often these outcomes were overlooked by professionals, such as body image. There is a  
21 patient advisory group for the COS and the systematic review was discussed at these  
22 meetings. Patients were not actively involved in data collection or analysis of this review.

1  
2  
3 1 Dissemination will occur at the annual traumatic brachial plexus charity UK meeting where  
4  
5 2 updates from the project are presented yearly and through a six monthly newsletter.  
6  
7

## 8 3 9 4 **Results**

### 10 5 11 12 6 **Included studies**

13  
14  
15 7 The search identified 1159 studies, after removing duplicates 1105 studies remained. Titles  
16  
17 8 and abstract review identified 169 potentially relevant articles. Of these, 37 studies did not  
18  
19 9 meet the inclusion criteria and were excluded (PRISMA flow diagram; figure 1) thus, 132  
20  
21 10 studies formed the basis of this review. All included studies are presented in supplementary  
22  
23 11 file 4.  
24  
25  
26  
27  
28  
29  
30  
31  
32  
33

34 12  
35 13 Place figure 1 here

36 14 Figure 1. Preferred Reporting Items for Systematic Reviews and meta-analysis flow diagram.  
37  
38  
39  
40  
41  
42  
43  
44  
45  
46  
47  
48  
49  
50  
51  
52  
53  
54  
55  
56  
57  
58  
59  
60

### 61 16 **Study characteristics**

62 17 Thirty-two countries from six continents recruited 3201 participants into the 132 studies  
63  
64 18 (Table 1). Of the 132 studies, 87 (66%) were retrospective case series with most studies  
65  
66 19 published from Asia (n=61, 46%). The most frequently studied surgical intervention was  
67  
68 20 nerve transfers (n=66, 57%).  
69  
70

Table 1. Characteristics and demographics of included studies

|                                                | Study number (%) |
|------------------------------------------------|------------------|
| Number of retrospective studies                | 87/132(66)       |
| Number of prospective studies                  | 21/132 (16)      |
| Number of case studies                         | 23/132(17)       |
| Randomized controlled trial                    | 1/132 (0.8)      |
| <b>World region recruitment</b>                |                  |
| Asia                                           | 61/132(46)       |
| North America                                  | 20/132(15)       |
| South America                                  | 20/132(15)       |
| Europe                                         | 27/132(20)       |
| Africa                                         | 3/132(2.2)       |
| Australasia                                    | 1/132(0.8)       |
| <b>Year published</b>                          |                  |
| 2013                                           | 25/132 (19)      |
| 2014                                           | 24/132(18)       |
| 2015                                           | 15/132(11)       |
| 2016                                           | 30/132(23)       |
| 2017                                           | 27/132(20)       |
| 2018                                           | 11/132(8.3)      |
| <b>Gender (total 3201)</b>                     |                  |
| Male                                           | 2622/3201(82)    |
| Female                                         | 323/3201(10)     |
| Not stated                                     | 256/3201(7.9)    |
| <b>Site of plexus injury per study (n=132)</b> |                  |
| Upper trunk                                    | 26/132(20)       |
| Lower trunk                                    | 10/132(7.6)      |

|                          |            |
|--------------------------|------------|
| Pan plexus (all avulsed) | 50/132(38) |
| Infraclavicular          | 7/132(5.3) |
| Mixture                  | 32/132(24) |
| Unclear                  | 7/132(5.3) |

### Interventions (n=132)

|                 |              |
|-----------------|--------------|
| Surgical        | 115/132(87)  |
| Electrotherapy  | 2/132(1.5)   |
| Pain treatments | 11/132 (8.3) |
| Rehabilitation  | 2/132(1.5)   |
| Orthotic        | 1/132(0.7)   |
| Stem cell       | 1/132(0.7)   |

### Types of surgical intervention (n=115)

|                    |            |
|--------------------|------------|
| Neurotisation      | 66/115(57) |
| Tendon transfer    | 7/115(6.1) |
| Free flap          | 16/115(14) |
| Multiple surgeries | 12/115(10) |
| Contralateral C7   | 8/115(6.9) |
| Other              | 6/115(5.2) |

---

1  
2  
3  
4  
5  
6  
7  
8  
9  
10  
11  
12  
13  
14  
15  
16  
17  
18  
19  
20  
21  
22  
23  
24  
25  
26  
27  
28  
29  
30  
31  
32  
33  
34  
35  
36  
37  
38  
39  
40  
41  
42  
43  
44  
45  
46  
47  
48  
49  
50  
51  
52  
53  
54  
55  
56  
57  
58  
59  
60

## 1 **Outcomes**

2 Extraction of each verbatim outcome domain from each study (e.g range of movement and  
3 muscle strength) and those extracted from measures composed of several items identified a  
4 total of 1460 verbatim outcomes. After removing duplicates 157 different unique outcomes  
5 remained. No single outcome was reported across all 132 studies.

6 *Outcome definition variation.* Many outcomes were not clearly defined and different terms  
7 were frequently found for the same concept. For example, shoulder abduction strength was  
8 described in eleven different ways including 'deltoid strength', 'motor function of axillary  
9 nerve', 'motor recovery of shoulder abductors', 'muscle power supraspinatus', 'motor  
10 function of Deltoid', 'motor function of Supraspinatus'.

11 *Outcome timing variation:* Of the 1460 verbatim outcomes, 46% (672) were measured  
12 between one and three years following intervention. For 83 outcomes the timing of the  
13 measurement was not stated. See Figure 2.

14  
15 Place Figure 2 here

16 Figure 2. Timepoints of reported outcomes

17

18

19

20

21

22

23

24

1  
2  
3 1  
4  
5  
6 2  
7  
8 3  
9  
10 4  
11  
12  
13 5  
14  
15 6  
16  
17 7  
18  
19 8  
20  
21 9  
22  
23 10  
24  
25 11  
26  
27 12  
28  
29 13  
30  
31  
32  
33  
34  
35 14  
36  
37 15  
38  
39 16  
40  
41  
42 17  
43  
44 18  
45  
46  
47 19  
48  
49 20  
50  
51  
52  
53 21  
54  
55  
56 22  
57  
58  
59 23  
60

*Outcome domains:* The 157 different types of outcomes were categorized into four core areas (Physiological and Clinical, Life Impact, Resource Use, Adverse Events/Complications) and 11 domains according to the COMET recommendations,[24]. See supplementary file 5. The core area Physiological/Clinical included three domains: musculoskeletal and connective tissue outcomes, nervous system outcomes and general/symptom outcomes. The core area Life Impact included seven domains: physical functioning, social functioning, role functioning, emotional functioning, global quality of life, perceived health status and delivery of care. The core area Resource Use included one domain: hospital resources. The core area Adverse Events included one domain: adverse events. No outcome could be placed into the core area Death.

Tables 2 to 4 summarise the number of unique outcomes within each domain and the number of studies reporting these outcomes in each core area. The most frequently reported domains were all in the Physiological/ Clinical core area and included musculoskeletal and connective tissue (87%), nervous system (35%) and symptoms (36%). Forty-four studies (33%) reported complications/ adverse events.

Table 2. Physiological /Clinical Core Area

| <b>Outcome Domains</b>                | <b>Number of unique outcomes reported within domain</b> | <b>Examples of unique outcomes</b>                                                                               | <b>Number of studies reporting outcomes in domain (%)</b> |
|---------------------------------------|---------------------------------------------------------|------------------------------------------------------------------------------------------------------------------|-----------------------------------------------------------|
| Musculoskeletal and connective tissue | 18                                                      | Active range of movement, muscle strength, muscle fatigue                                                        | 115/132 (87%)                                             |
| Nervous system                        | 15                                                      | Progression of nerve regeneration, ability to feel light touch, ability to feel pain                             | 46/132 (35%)                                              |
| General/ symptoms                     | 23                                                      | Pain intensity/relief, pain duration, pain quality, pain when arm exposed to cold, stiffness, sleep, paresthesia | 47/132 (36%)                                              |



1  
2  
3 1  
4  
5 2 Table 3. Life Impact Core Area  
6

| <b>Outcome Domains</b>  | <b>Number of unique outcomes reported within domain</b> | <b>Examples of unique outcomes</b>                                         | <b>Number of studies reporting outcomes within domain (%)</b> |
|-------------------------|---------------------------------------------------------|----------------------------------------------------------------------------|---------------------------------------------------------------|
| Physical functioning    | 19                                                      | Reaching, fine hand movement                                               | 30/132 (23%)                                                  |
| Role functioning        | 23                                                      | Return to work, Impact on normal hobbies                                   | 33/132 (25%)                                                  |
| Social functioning      | 7                                                       | Social activities with family                                              | 30/132 (23%)                                                  |
| Emotional functioning   | 13                                                      | Body image, acceptance                                                     | 29/132 (22%)                                                  |
| Global quality of life  | 1                                                       | Quality of life                                                            | 1/132 (0.8%)                                                  |
| Perceived health Status | 1                                                       | Health status rating                                                       | 6/132 (4.5%)                                                  |
| Delivery of care        | 13                                                      | Patient satisfaction, quality of care, patient preference, time to surgery | 11/132(8.3%)                                                  |

33 3  
34  
35  
36 4  
37  
38 5  
39  
40 6  
41  
42 7  
43  
44 8  
45  
46 9  
47 10  
48  
49 11  
50  
51 12  
52  
53 13  
54  
55 14  
56  
57 15  
58  
59 16  
60

3 Table 4. Adverse Events and Resource Use Core Areas

| Outcome Domains                     | Number of unique outcomes reported within domain | Examples of unique outcomes       | Number of studies reporting outcomes within domain |
|-------------------------------------|--------------------------------------------------|-----------------------------------|----------------------------------------------------|
| <b>Adverse Events Core Area</b>     |                                                  |                                   |                                                    |
| Donor site morbidity                | 3                                                | Motor weakness, sensory loss      | 24/132(18%)                                        |
| Musculoskeletal                     | 7                                                | Co -contraction, Passive movement | 12/132 (9%)                                        |
| Respiratory                         | 4                                                | Pneumothorax                      | 6/132 (4.5%)                                       |
| Vascular                            | 7                                                | Hematoma                          | 7/132 (5.3%)                                       |
| Infection                           | 1                                                | Infection                         | 3/132 (2.3%)                                       |
| General non specified complications | 1                                                | General complications             | 2/132 (1.5%)                                       |
| <b>Resource Use Core Area</b>       |                                                  |                                   |                                                    |
| Hospital resource use               | 1                                                | Operation time                    | 1/132 (.75%)                                       |

## 1 Outcome Measurement

2 In addition to extraction of standalone clinician reported and patient reported outcomes  
3 such as muscle power, range or movement or return to work, outcomes were also extracted  
4 from individual items contained in a total of 30 different instruments; PRO measures (n=  
5 20), combined clinician-reported and patient-reported measures (n= 3) and performance  
6 measures (n= 7). See table 5. These measures were reported 83 times in the included  
7 publications. Most outcome measures were used once (n= 25, 30%). The most frequently  
8 reported measures were the Disabilities of the Arm Shoulder and Hand (DASH,[27])  
9 questionnaire (n=27 studies, 32%) and the Visual Analogue Scale (n=18, 22%). The median  
10 number of items per instrument was 15 ranging from one (Visual Analogue Scale, Numerical  
11 Rating Scale and Wong Baker Faces rating scale),[28] to 54,[29]. These items mapped to 34  
12 different outcome domains.

13  
14 There was wide variation in the methods used to measure outcomes. This is presented in  
15 supplementary file 6 (Measurement instruments mapped to domains). For example; 62  
16 different measurements were used to evaluate muscle function, including the British  
17 Medical Research Council,[30] eleven different modifications of the British Medical Council,  
18 Isokinetics, Dynanometry and Constant - Murley score,[31]. In addition, it was often not  
19 clear which instrument was used for measurement of the outcomes. For example, the  
20 instrument used to measure active range of movement was not reported in 36% of total  
21 times (63/ 174) the outcome was assessed. Finally with regards to method of measurement  
22 55 studies employed a PRO instrument to evaluate the intervention.

23

1  
2  
3 1  
4  
5  
6 2  
7  
8  
9 3  
10  
11 4 Table 5: Outcome measures used in included studies  
12  
13  
14  
15  
16  
17  
18  
19  
20  
21  
22  
23  
24  
25  
26  
27  
28  
29  
30  
31  
32  
33  
34  
35  
36  
37  
38  
39  
40  
41  
42  
43  
44  
45  
46  
47  
48  
49  
50  
51  
52  
53  
54  
55  
56  
57  
58  
59  
60

|                      |                                                                                       | Number of items | Number of scales | Frequency (n=83) |
|----------------------|---------------------------------------------------------------------------------------|-----------------|------------------|------------------|
|                      | <b>Upper limb physical function measures (n= 16)</b>                                  |                 |                  |                  |
| PRO Measures         | Disabilities of Arm Shoulder and Hand                                                 | 38              | 3                | 27               |
|                      | Upper Extremity Functional Index                                                      | 20              | 0                | 2                |
|                      | American Shoulder and Elbow Score                                                     | 15              | 0                | 1                |
|                      | Modified American Shoulder and Elbow Score                                            | 13              | 0                | 1                |
|                      | Simple Shoulder test                                                                  | 12              | 0                | 1                |
|                      | Michigan Hand Questionnaire                                                           | 37              | 0                | 1                |
| PRO & ClinRO Measure | University of California Los Angelus shoulder score                                   | 5               | 0                | 1                |
|                      | Constant- Murley                                                                      | 5               | 0                | 1                |
|                      | MAYO Performance Index                                                                | 4               | 0                | 1                |
| Performance Measures | Jebsen Taylor                                                                         | 7               | 0                | 1                |
|                      | University of New Brunswick Test of Prosthetic Function for Unilateral Amputees (UNB) | 30              | 3                | 1                |
|                      | Upper Limb Module Questionnaire                                                       | 22              | 3                | 1                |
|                      | Action Reach Arm Test                                                                 | 19              | 4                | 1                |
|                      | Southampton Hand Assessment Procedure                                                 | 26              | 0                | 1                |
|                      | Purdue Peg test                                                                       | 3               | 0                | 1                |
|                      | Activities Measure for Upper Limb Amputees                                            | 24              | 0                | 1                |
| PRO Measures         | <b>Generic questionnaires (n=2)</b>                                                   |                 |                  |                  |
|                      | 36 item short form survey (SF36)                                                      | 36              | 8                | 5                |
|                      | Patient Specific Functional Score                                                     | 4               | 0                | 1                |
|                      | <b>Condition specific questionnaires (n=1)</b>                                        |                 |                  |                  |

|    |                                               |    |   |    |
|----|-----------------------------------------------|----|---|----|
| 1  |                                               |    |   |    |
| 2  |                                               |    |   |    |
| 3  |                                               |    |   |    |
| 4  | Trinity Amputation and Prosthesis scale       | 54 | 5 | 1  |
| 5  |                                               |    |   |    |
| 6  | <b>Symptom specific questionnaires (n=10)</b> |    |   |    |
| 7  | Visual Analogue Scale                         | 1  | 0 | 18 |
| 8  |                                               |    |   |    |
| 9  | Numerical Rating Scale                        | 1  | 0 | 6  |
| 10 |                                               |    |   |    |
| 11 | Wong Baker Faces rating scale                 | 1  | 0 | 1  |
| 12 |                                               |    |   |    |
| 13 | Brief pain inventory                          | 15 | 6 | 1  |
| 14 |                                               |    |   |    |
| 15 | Neuropathic pain symptom inventory            | 10 | 5 | 1  |
| 16 |                                               |    |   |    |
| 17 | University of Washington Neuropathic score    | 10 | 3 | 1  |
| 18 |                                               |    |   |    |
| 19 | McGill Pain Questionnaire                     | 28 | 3 | 1  |
| 20 |                                               |    |   |    |
| 21 | McGill Pain Questionnaire SF                  | 17 | 3 | 1  |
| 22 |                                               |    |   |    |
| 23 | McGill Pain Questionnaire (Japanese version)  | 17 | 3 | 1  |
| 24 |                                               |    |   |    |
| 25 | Self- rating anxiety scale                    | 20 | 0 | 1  |
| 26 |                                               |    |   |    |
| 27 | Zung Self rating Depression scale             | 20 | 0 | 1  |
| 28 |                                               |    |   |    |

1  
2  
3  
4  
5  
6  
7  
8  
9  
10  
11  
12  
13  
14  
15  
16  
17  
18  
19  
20  
21  
22  
23  
24  
25  
26  
27  
28  
29  
30  
31  
32  
33  
34  
35  
36  
37  
38  
39  
40  
41  
42  
43  
44  
45  
46  
47  
48  
49  
50  
51  
52  
53  
54  
55  
56  
57  
58  
59  
60

## DISCUSSION

This systematic review aimed to identify what outcome domains have been reported in studies evaluating interventions for TBPI, examine outcome definitions and timepoints and identify the instruments used to assess outcomes. We found a wide variation in reported outcomes, timing of outcomes and outcome instruments used. Furthermore, a lack of standardized definition for commonly reported outcomes was observed. This heterogeneity in outcome reporting across studies hinders evidence synthesis and results in research waste,[32].

The most commonly reported core area was Physiological/ Clinical including musculoskeletal, nervous system and symptom domains. Eighty-seven percent of studies reported musculoskeletal outcomes. However, there were 21 different outcomes reported in this category making comparison between studies difficult. Furthermore, the diversity of measures used to assess the outcomes increases the difficulty with synthesis. For example, muscle function/ strength was assessed using 59 different measures, whilst 10 studies did not report what measure they used. To compound this muscle strength was assessed by both physical examination by a clinician (86%) and also by asking the patient(10%).

1  
2  
3 1 Only 42% of studies (55/132) evaluated PROs and within these studies there was significant  
4  
5  
6 2 heterogeneity in the measurement instrument used. Twenty-three different instruments  
7  
8 3 were used with 18 only ever used once. The DASH was the most common instrument  
9  
10 4 employed, in just over half the studies evaluating a PRO. The PRO instruments also varied  
11  
12  
13 5 greatly in terms of content with some as simple as a single item whilst others included up to  
14  
15 6 54 items. Over 273 individual questionnaire items were evident from the 23 PRO  
16  
17  
18 7 instruments mapping to 34 different outcomes domains. This highlighted a lack of  
19  
20 8 consistency with no domain being measured by all PRO instruments. None of the included  
21  
22  
23 9 PRO assessments were designed specifically for individuals with a TBPI. Although this may  
24  
25 10 be beneficial in terms of comparison with other conditions, such instruments may not be  
26  
27  
28 11 sensitive to issues of importance to patients with TBPI. These issues combined pose major  
29  
30 12 questions regarding the clinical interpretation of results from TBPI studies.  
31  
32  
33  
34  
35  
36  
37  
38  
39  
40  
41  
42  
43  
44  
45  
46  
47  
48  
49  
50  
51  
52  
53  
54  
55  
56  
57  
58  
59  
60

15 It is clear that that individuals with a TBPI suffer significant emotional and psychosocial  
16 issues,[1,33]. However such issues were infrequently and inconsistently measured within  
17 this review. Only one study considered Quality of Life (QoL) as an outcome,[34] using a  
18 single item PRO. Similarly, physical, role and social functioning outcomes were reported in  
19 23%, 25% and 23% of studies respectively. This relates strongly to the use of the DASH  
20 within the studies. Indeed, emotional functioning was reported in 29 studies, 27 of these  
21 studies used the DASH which has one item on confidence and capability mapping to this  
22 domain. If the DASH was excluded, only seven studies would assess outcomes within the  
23 emotional functioning domain. This is surprising considering the existing literature which

1  
2  
3 1 evidences the complex emotional and psychological factors, individuals face when adjusting  
4  
5  
6 2 to their injury,[1,35].  
7  
8  
9 3

10 4 Complications/adverse events were reported in 33% of studies. Documentation of  
11  
12  
13 5 complications is crucial to improve patient care and gather data for benchmarking. In 1992,  
14  
15 6 the Clavien-Dindo classification,[36] was introduced to assist with classification of  
16  
17  
18 7 complications to enable comparison between studies,[36]. However, within the adverse  
19  
20 8 events outcomes identified in this review there was heterogeneity. Of the 37 verbatim  
21  
22  
23 9 outcomes reported within the donor morbidity (motor) outcome 19 did not define how this  
24  
25 10 was assessed.  
26  
27  
28 11

29  
30 12 There are some limitations. We excluded outcomes from older studies to ensure we  
31  
32  
33 13 identified outcomes relevant to contemporary TBPI care. Formal quality assessment of  
34  
35 14 studies was not undertaken, however the review was designed to identify the breadth of  
36  
37  
38 15 reporting in the literature and not to examine the effectiveness of interventions. The  
39  
40 16 strengths of this review are that the protocol and the data extraction form were  
41  
42  
43 17 prespecified, prospectively registered and the literature search systematic. To account for  
44  
45 18 multidisciplinary perspectives, researchers and clinicians were involved in categorizing  
46  
47  
48 19 outcomes into domains. It is the first review to detail the scale of outcome heterogeneity in  
49  
50 20 TBPI research using a systematic method. International and non-English publications were  
51  
52 21 included to reduce the risk of selection bias.  
53  
54  
55 22  
56  
57 23  
58  
59 24  
60



1  
2  
3 1 Variation in definitions and measurement of outcomes has been found within other areas of  
4  
5  
6 2 healthcare. Outcome heterogeneity is found in the reporting of outcomes relating to burn  
7  
8 3 care,[37] breast reconstruction,[38] and spinal cord injury,[39] amongst others. A recent  
9  
10 4 review of outcome reporting within burns illustrated wound healing was defined in 166  
11  
12 5 different ways across 147 studies,[37]. A solution to the variation in outcome reporting  
13  
14 6 across studies in TBPI is the development of a COS,[20]. This has been shown to improve  
15  
16 7 consistency of outcome reporting,[19,40]. Development of a COS in TBPI would not restrict  
17  
18 8 the range of outcomes that can be measured. Researchers and clinicians would still be free  
19  
20 9 to select additional outcomes but the inclusion of such a COS would facilitate synthesis of  
21  
22 10 evidence,[41,42]. Whilst work has begun in obstetric brachial plexus injuries to develop a  
23  
24 11 minimum data set[43], there is no COS for TBPI.

25  
26  
27  
28  
29  
30  
31  
32 13 Considerable work has been done by the Core Outcome Measures in Effectiveness Trials  
33  
34 14 (COMET) initiative through dissemination of resources for COS development and support for  
35  
36 15 methodological development. COMET recommends a five step process to develop a COS:  
37  
38 16 define the scope, assess the need, develop the protocol, determine what to measure and  
39  
40 17 determine how to measure,[44]. This systematic review addresses these first two steps for  
41  
42 18 the development of the COS in TBPI care. This review has shown the majority of TBPI studies  
43  
44 19 use only clinician reported outcomes to evaluate interventions. However they do not  
45  
46 20 adequately capture patients' health related quality of life,[45] and may underestimate the  
47  
48 21 impact of a condition,[46]. Concurrent qualitative work to identify outcomes which are  
49  
50 22 important to individuals with a TBPI has been completed by this group. The next stage  
51  
52 23 involves integration of all potential outcomes from this review and the qualitative work into  
53  
54 24 a long list of domains. Healthcare professionals and patients will be invited to prioritize  
55  
56  
57  
58  
59  
60

1 these outcomes during a three round international online Delphi process and consensus  
2 meeting. This will strengthen the case for uptake of a COS for TBPI as it represents patients'  
3 and clinicians' perspectives on what outcomes are important. The final stage will map  
4 existing validated measures to the outcome domains in the final COS. A future study will  
5 evaluate the psychometric properties of those mapped measurement instruments and  
6 identify if new measures need to be developed.

For peer review only

## CONCLUSION

1  
2  
3  
4  
5  
6 2 This systematic review has shown that outcome reporting in TBPI care is heterogenous and  
7  
8 3 impairment focused with a lack of standardized definitions for commonly reported  
9  
10 4 outcomes. This makes it difficult to compare and combine data from studies to inform  
11  
12 5 decision making in clinical practice. The measurement instruments used in the studies were  
13  
14 6 also often not clear, particularly when range of movement was assessed. In future studies,  
15  
16 7 authors need to be clearer with descriptions of outcomes assessed and how they were  
17  
18 8 measured. Less than half the studies in this review evaluated outcomes using PRO  
19  
20 9 measures. Given that TBPI has a significant impact on health-related quality of life, it is  
21  
22 10 recommended that authors of future studies include PROs in future studies. We have  
23  
24 11 identified a list of potentially relevant outcomes and categorized these into a clear  
25  
26 12 taxonomy. This will inform the next stage of developing a COS for TBPI where patients,  
27  
28 13 surgeons and therapists will be involved in a consensus process to decide the final outcomes  
29  
30 14 included in a COS for TBPI.  
31  
32  
33  
34  
35  
36  
37  
38  
39  
40  
41  
42  
43  
44

## Acknowledgements

45  
46  
47  
48 19 We would like to thank Colin Shirley for his assistance and guidance categorising  
49  
50 20 neurophysiological outcomes  
51  
52  
53  
54  
55  
56  
57  
58  
59  
60

1

**2 Competing Interests**

3 Conflicting interests: CM, CJH, JC, DMP and JOS declare no potential conflicts of interest  
4 with respect to the research, authorship and publication of this article. DGK reports grants  
5 from NIHR, grants from Innovate UK, grants from NIHR Birmingham Biomedical Research  
6 Centre, grants from NIHR SRMRC at the University of Birmingham and University Hospitals  
7 Birmingham NHS Foundation Trust, personal fees from Merck, personal fees from GSK,  
8 grants from Macmillan Cancer Support, grants from Kidney research UK, outside the  
9 submitted work; .

10

**11 Funding**

12 The work was supported by the National Institute of Health Research [grant number ICA-  
13 CDRF-2017-03-039]

14

**15 Data availability**

16 All data relevant to the study are included in the article or uploaded as supplementary  
17 information.

18

**19 Ethical approval**

20 Ethical approval was not sought for the present study because it was a systematic review  
21 and did not involve human participation

1  
2  
3 1  
4  
56 **2 Informed consent**  
78  
9 3 Informed consent was not sought for the present study because it was a systematic review  
10  
11  
12 4 and did not involve human participation  
13  
1415 5  
16  
1718 **6 Contributorship**  
1920  
21 7 CM, CJH and JC conceived and designed the review. CM and JOS reviewed the titles,  
22  
23 8 abstracts and full text papers for eligibility. Authors resolved disagreements by discussion or  
24  
25 9 where necessary CJH and DMP offered their view. CM and JOS were responsible for  
26  
27 10 extracting data and data extraction was verified by CJH. CM, CJH and JC categorised  
28  
29 11 outcomes. Categorisation was reviewed and edited by DMP and DK. CM prepared the  
30  
31 12 manuscript. CJH,JC, DMP, DK and JOS reviewed and edited the manuscript.  
32  
33  
34  
3536 13  
37  
3839 14  
4041 15  
42  
4344 16  
4546 17  
47  
4849 18  
5051 19  
5253 20  
5455 21  
56  
5758 22  
59  
60

## References

- [1] Brito S, White J, Thomacos N, et al. The lived experience following free functioning muscle transfer for management of pan-brachial plexus injury: reflections from a long-term follow-up study. *Disabil Rehabil* 2019;1:1–9.
- [2] Morris M, Daluiski A, Dy C. A thematic analysis of online discussion boards for brachial plexus injury. *J Hand Surg AM* 2016;41(8):813-8.
- [3] Kaiser R, Waldauf P, Ullas G, et al. Epidemiology, etiology, and types of severe adult brachial plexus injuries requiring surgical repair: systematic review and meta-analysis. *Neurosurg Rev* 2020;43(2):443-452.
- [4] Moran CG, Lecky F, Bouamra O, et al. Changing the system - major trauma patients and their outcomes in the NHS (England) 2008-17. *EClinicalMedicine* 2018;13–21.
- [5] Dy CJ, Peacock K, Olsen MA, et al. Incidence of surgically treated brachial plexus injury in privately insured adults under 65 years of age in the USA. *Hosp Spec Surg J* 2020;online.
- [6] Midha R. Epidemiology of brachial plexus injuries in a multitrauma population. *Neurosurgery* 1997;40:1182–8
- [7] Felici N, Zaami S, Ciancolini G, et al. Cost analysis of brachial plexus injuries: Variability of compensation by insurance companies before and after surgery. *Handchir Mikrochir Plast Chir* 2014;46:85–9.
- [8] Hong TS, Tian A, Sachar R, et al. Indirect cost of traumatic brachial plexus injuries in the United States. *J Bone Joint Surg Am* 2019;101:e80.
- [9] Bhandari PS, Maurya S. Recent advances in the management of brachial plexus

- 1  
2  
3 1 injuries. *Indian J Plast Surg* 2014;47:191–8.  
4  
5  
6 2 [10] Kubota S, Hara Y, Shimizu Y, et al. A newly developed upper limb single-joint HAL in a  
7  
8 3 patient with elbow flexion reconstruction after traumatic brachial plexus injury: A  
9  
10 4 case report. *Interdiscip Neurosurg Adv Tech Case Manag* 2017;10:66–8.  
11  
12  
13 5 [11] Dickinson HD. Evidence-based decision-making: an argumentative approach. *Int J*  
14  
15 6 *Med Inform* 1998;51:71–81.  
16  
17  
18 7 [12] Sackett DL, Rosenberg WM, Gray JA, et al. Evidence based medicine: what it is and  
19  
20 8 what it isn't. *BMJ* 1996;312:71–2.  
21  
22  
23 9 [13] Ayhan E, Soldado F, Fontecha CG, et al. Elbow flexion reconstruction with nerve  
24  
25 10 transfer or grafting in patients with brachial plexus injuries: A systematic review and  
26  
27 11 comparison study. *Microsurgery* 2020;40:79–86.  
28  
29  
30 12 [14] Donnelly MR, Rezzadeh KT, Vieira D et al. Is one nerve transfer enough? A systematic  
31  
32 13 review and pooled analysis comparing ulnar fascicular nerve transfer and double  
33  
34 14 ulnar and median fascicular nerve transfer for restoration of elbow flexion after  
35  
36 15 traumatic brachial plexus injury. *Microsurgery* 2020;40:361–9.  
37  
38  
39  
40 16 [15] Dy CJ, Garg R, Lee SK, et al. A systematic review of outcomes reporting for brachial  
41  
42 17 plexus reconstruction. *J Hand Surg Am* 2015;40:308–13.  
43  
44  
45 18 [16] Hill B, Williams G, Olver J, et al. Letter regarding outcome reporting for brachial  
46  
47 19 plexus reconstruction. *J Hand Surg Am* 2015;40:1504.  
48  
49  
50 20 [17] Gargon E, Gurung B, Medley N, et al. Choosing important health outcomes for  
51  
52 21 comparative effectiveness research: a systematic review. *PLoS One* 2014;17(7):A435  
53  
54  
55 22 [18] Williamson P, Altman D, Blazeby J et al. Driving up the quality and relevance of  
56  
57 23 research through the use of agreed core outcomes. *J Health Serv Res Policy*  
58  
59 24 2012;17:1–2.  
60

- 1  
2  
3 1 [19] Kirkham JJ, Bracken M, Hind L, et al. Industry funding was associated with increased  
4  
5 use of core outcome sets. *J Clin Epidemiol* 2019;115:90–7.  
6 2  
7  
8 3 [20] Williamson PR, Altman DG, Blazeby JM et al. The COMET (Core Outcome Measures in  
9  
10 Effectiveness Trials) Initiative. *Trials* 2011;12:A70.  
11 4  
12  
13 5 [21] Higgins J, Green S. Cochrane Handbook for Systematic Reviews of Interventions  
14  
15 Version (updated March 2011). version 5. 2011.  
16 6  
17  
18 7 [22] Shamseer L, Moher D, Clarke M, et al. Preferred reporting items for systematic review  
19  
20 and meta-analysis protocols (PRISMA-P) 2015: elaboration and explanation. *BMJ*  
21 8  
22 2015;349:g7647.  
23 9  
24  
25 10 [23] Richardson E, Burnell J, Adams HR, et al. Developing and Implementing Performance  
26  
27 Outcome Assessments: Evidentiary, Methodologic, and Operational Considerations.  
28 11  
29 *Ther Innov Regul Sci.* 2019;53(1):146-153.  
30 12  
31  
32 13 [24] Cieza A, Geyh S, Chatterji S, et al. ICF linking rules: an update based on lessons  
33  
34 learned. *J Rehabil Med* 2005;37:212–8.  
35 14  
36  
37 15 [25] Dodd S, Clarke M, Becker L, et al. A taxonomy has been developed for outcomes in  
38  
39 medical research to help improve knowledge discovery. *J Clin Epidemiol* 2018;96:84–  
40 16  
41 92.  
42 17  
43  
44 18 [26] Young AE, Brookes ST, Avery KNL, et al. A systematic review of core outcome set  
45  
46 development studies demonstrates difficulties in defining unique outcomes. *J Clin*  
47 19  
48 *Epidemiol* 2019;115:14–24.  
49 20  
50  
51  
52 21 [27] Hudak PL, Amadio PC, Bombardier C, et al. Development of an upper extremity  
53  
54 outcome measure: The DASH (disabilities of the arm, shoulder, and head). *Am J Ind*  
55 22  
56 *Med* 1996;29:602–8.  
57 23  
58  
59 24 [28] Baker C, Wong D. Q.U.E.S.T: a process of pain assessment in children (continuing  
60



- 1  
2  
3 1 education credit). *Orthop Nurs* 1987;6:11–21.
- 4  
5  
6 2 [29] Gallagher P, MacLachlan M. Development and psychometric evaluation of the trinity  
7  
8 3 amputation and prosthesis experience scales (TAPES). *Rehabil Psychol* 2000;45:130–  
9  
10 4 54.
- 11  
12  
13 5 [30] Medical Research Council. Aids to the investigation of the peripheral nervous system.  
14  
15 6 London: Her Majesty's stationary office; 1943.
- 16  
17  
18 7 [31] Constant CR, Murley AH (1987) A clinical method of functional assessment of the  
19  
20 8 shoulder. *Clinical Orthopaedics & Related Research* 1987;214:160-164
- 21  
22  
23 9 [32] Chalmers I, Glasziou P. Avoidable waste in the production and reporting of research  
24  
25 10 evidence. *Lancet* 2009;374:86–9.
- 26  
27  
28 11 [33] McDonald J, Pettigrew J. Traumatic brachial plexus injury: the lived experience. *British*  
29  
30 12 *Journal of Occupational Therapy* 2014;77(3):147-154.
- 31  
32  
33 13 [34] Kim JH, Shin SH, Lee YR, et al. Ultrasound-guided peripheral nerve stimulation for  
34  
35 14 neuropathic pain after brachial plexus injury: two case reports. *J Anesth* 2017;31:453–  
36  
37 15 7.
- 38  
39  
40 16 [35] Miller C, Peek AL, Power D, et al. Psychological consequences of traumatic upper limb  
41  
42 17 peripheral nerve injury: A systematic review. *Hand Ther* 2017;22:35–45.
- 43  
44  
45 18 [36] Clavien P, Sanabria J, Strasberg S. Proposed classification of complications of surgery  
46  
47 19 with examples of utility in cholecystectomy. *Surgery* 1992;111(5):518-26
- 48  
49  
50 20 [37] Young AE, Davies A, Bland S et al. Systematic review of clinical outcome reporting in  
51  
52 21 randomised controlled trials of burn care. *BMJ Open* 2019;15;9(2):e025135
- 53  
54  
55 22 [38] Potter S, Brigic A, Whiting PF, et al. Reporting clinical outcomes of breast  
56  
57 23 reconstruction: a systematic review. *J Natl Cancer Inst* 2011;103:31–46.
- 58  
59  
60 24 [39] Watzlawick R, Antonic A, Sena ES, et al. Outcome heterogeneity and bias in acute

- 1 experimental spinal cord injury A meta-analysis. *Neurology* 2019;2;93(1):e40-e51
- 2
- 3 1 experimental spinal cord injury A meta-analysis. *Neurology* 2019;2;93(1):e40-e51
- 4
- 5 [40] Bautista-Molano W, Navarro-Compán V, Landewé RBM, et al. How well are the
- 6
- 7 ASAS/OMERACT core outcome sets for ankylosing spondylitis implemented in
- 8
- 9 randomized clinical trials? A systematic literature review. *Clin Rheumatol*
- 10
- 11 2014;33:1313–22.
- 12
- 13 [41] Clarke M, Williamson PR. Core outcome sets and systematic reviews. *Syst Rev*
- 14
- 15 2016;5:11.
- 16
- 17 [42] Clarke M. Standardising outcomes for clinical trials and systematic reviews. *Trials*
- 18
- 19 2007;8:39.
- 20
- 21 [43] Pondaag W, Malessy MJA. Outcome assessment for Brachial Plexus birth injury.
- 22
- 23 Results from the iPluto world-wide consensus survey. *J Orthop Res* 2018;36:2533–41.
- 24
- 25 [44] Williamson PR, Altman DG, Bagley H, et al. The COMET Handbook: version 1.0. *Trials*
- 26
- 27 2017;18:280.
- 28
- 29 [45] Pakhomov S, Jacobsen SJ, Chute CG, et al. Agreement between patient-reported
- 30
- 31 symptoms and their documentation in the medical record. *Am J Manag Care*
- 32
- 33 2008;14:530–9.
- 34
- 35 [46] Turner GM, Slade A, Retzer A, et al. An Introduction to Patient Reported Outcome
- 36
- 37 Measures (PROMs) in Trauma. *J Trauma Acute Care Surg* 2019;86(2):314-320
- 38
- 39
- 40
- 41
- 42
- 43
- 44
- 45
- 46
- 47
- 48
- 49
- 50
- 51
- 52
- 53
- 54
- 55
- 56
- 57
- 58
- 59
- 60

Figure 2 Legends

mths, months; NS, not stated; yrs, years.

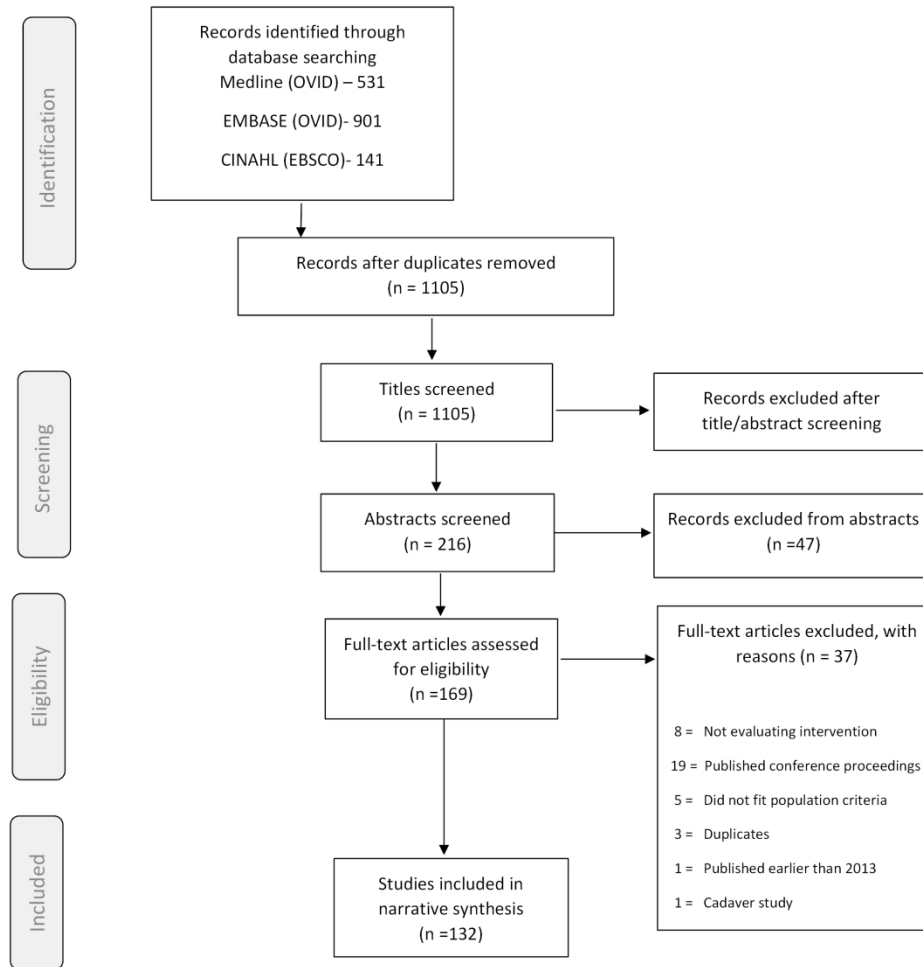

Figure 1. Preferred Reporting Items for Systematic Reviews and meta-analysis flow diagram.

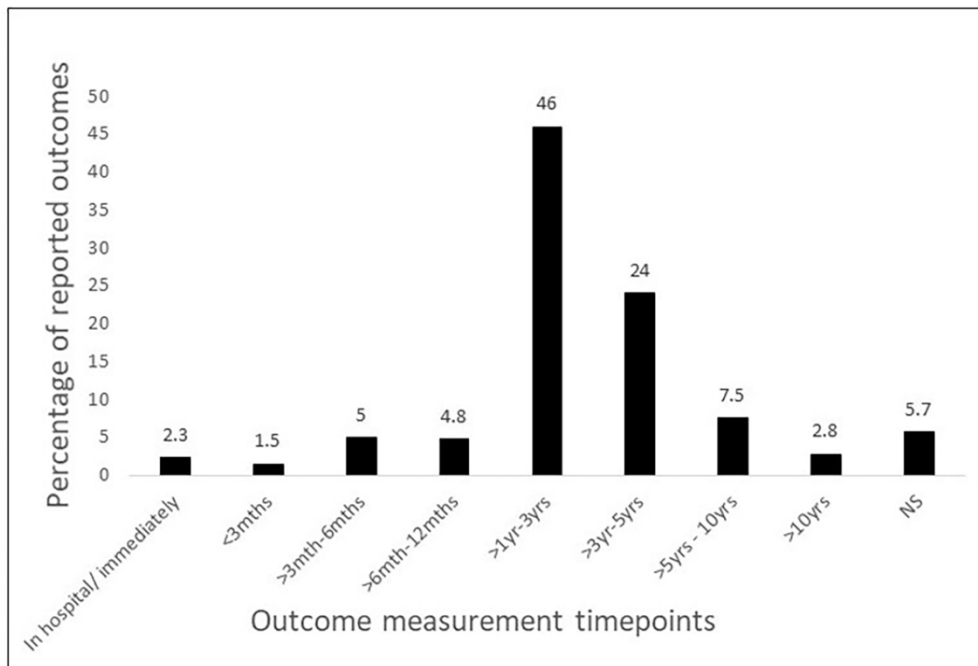

Figure 2. Timepoints of reported outcomes

## Developing a core outcome set for traumatic brachial plexus injuries: a systematic review of outcomes

### Appendix S1. Deviations from study protocol

| Protocol method                                                                                     | Deviation from protocol method with justification                                                                                                                                                                                                                                                                                                                        |
|-----------------------------------------------------------------------------------------------------|--------------------------------------------------------------------------------------------------------------------------------------------------------------------------------------------------------------------------------------------------------------------------------------------------------------------------------------------------------------------------|
| We planned to hand search Journal of Hand Surgery (Eur) and The Journal of Hand Surgery (American). | We did not hand search these Journals as they were all indexed for MEDLINE.                                                                                                                                                                                                                                                                                              |
| We planned to include studies with participants aged 18 and over within the review.                 | We reduced the age of include participants to 16 or over as many studies included older teenagers with adults in their studies. On discussion with the research team we concluded that there was no difference between treatment of those aged 16 and over versus aged 18. If we excluded these studies many outcomes used across these age ranges would have been lost. |

**Title:** Supplementary File 2 MEDLINE (OVID) search strategy**Article title:** Developing a core outcome set for Traumatic Brachial Plexus Injuries: a systematic review of outcomes**Author:** Miller et al (2020)

Search strategy 18/09/2018 COMBINE systematic review

## MEDLINE (OVID)

1.(brachial plexus adj3 injur\*).mp. [mp=title, abstract, original title, name of substance word, subject heading word, floating sub-heading word, keyword heading word, protocol supplementary concept word, rare disease supplementary concept word, unique identifier, synonyms]

2 (brachial plexus adj3 pals\*).mp. [mp=title, abstract, original title, name of substance word, subject heading word, floating sub-heading word, keyword heading word, protocol supplementary concept word, rare disease supplementary concept word, unique identifier, synonyms]

3 (brachial plexus adj3 lesion\*).mp. [mp=title, abstract, original title, name of substance word, subject heading word, floating sub-heading word, keyword heading word, protocol supplementary concept word, rare disease supplementary concept word, unique identifier, synonyms]

4 brachial plexopath\*.mp. [mp=title, abstract, original title, name of substance word, subject heading word, floating sub-heading word, keyword heading word, protocol supplementary concept word, rare disease supplementary concept word, unique identifier, synonyms]

5 (brachial plexus adj3 traction\*).mp. [mp=title, abstract, original title, name of substance word, subject heading word, floating sub-heading word, keyword heading word, protocol supplementary concept word, rare disease supplementary concept word, unique identifier, synonyms]

6 (brachial plexus adj3 avulsion\*).mp. [mp=title, abstract, original title, name of substance word, subject heading word, floating sub-heading word, keyword heading word, protocol supplementary concept word, rare disease supplementary concept word, unique identifier, synonyms]

7 Brachial Plexus/in, su, tr [Injuries, Surgery, Transplantation]

8 1 or 2 or 3 or 4 or 5 or 6 or 7

9 limit 8 to (humans and "all adult (19 plus years)")

10. limit 9 to yr= "2013- current"

## Supplementary file 3: COMET outcome taxonomy

Article title: Developing a core outcome set for Traumatic Brachial Plexus Injuries: a systematic review of outcomes

**Title:** Supplementary file 3: COMET outcome taxonomy - adapted from Dodd et al (2018)

| <b>Core Area</b>              | <b>Outcome Domain</b>                                                                                |
|-------------------------------|------------------------------------------------------------------------------------------------------|
| <b>Death</b>                  | 1. Mortality/ survival                                                                               |
| <b>Physiological/clinical</b> | 2. Blood and lymphatic system outcomes                                                               |
|                               | 3. Cardiac outcomes                                                                                  |
|                               | 4. Congenital, familial and genetic outcomes                                                         |
|                               | 5. Endocrine outcomes                                                                                |
|                               | 6. Ear and labyrinth outcomes                                                                        |
|                               | 7. Eye outcomes                                                                                      |
|                               | 8. Gastrointestinal outcomes                                                                         |
|                               | 9. General outcomes                                                                                  |
|                               | 10. Hepatobiliary outcomes                                                                           |
|                               | 11. Immune system outcomes                                                                           |
|                               | 12. Infection and infestation outcomes                                                               |
|                               | 13. Injury and poisoning outcomes                                                                    |
|                               | 14. Metabolism and nutrition outcomes                                                                |
|                               | 15. Musculoskeletal and connective tissue outcomes                                                   |
|                               | 16. Outcomes, relating to neoplasms: benign, malignant and unspecified ( including cysts and polyps) |
|                               | 17. Nervous system outcomes                                                                          |
|                               | 18. Pregnancy, puerperium and perinatal outcomes                                                     |
|                               | 19. Renal and urinary outcomes                                                                       |
|                               | 20. Reproductive system and breast outcomes                                                          |
|                               | 21. Psychiatric outcomes                                                                             |
|                               | 22. Respiratory, thoracic and mediastinal outcomes                                                   |
|                               | 23. Skin and subcutaneous tissue outcomes                                                            |
|                               | 24. Vascular outcomes                                                                                |
| <b>Life Impact</b>            | <b>Functioning</b>                                                                                   |
|                               | 25. Physical functioning                                                                             |
|                               | 26. Social functioning                                                                               |
|                               | 27. Role functioning                                                                                 |
|                               | 28. Emotional functioning/ well being                                                                |
|                               | 29. Cognitive functioning                                                                            |
|                               | 30. Global quality of life                                                                           |
|                               | 31. Perceived health status                                                                          |
|                               | 32. Delivery of care                                                                                 |
|                               | 33. Personal circumstances                                                                           |
| <b>Resource use</b>           | <b>Resource Use</b>                                                                                  |
|                               | 34. Economic                                                                                         |
|                               | 35. Hospital                                                                                         |
|                               | 36. Need for further intervention                                                                    |
|                               | 37. Societal/ carer burden                                                                           |
| <b>Adverse Events</b>         | 38. Adverse Events / effects                                                                         |

Dodd S, Clarke M, Becker L et al. A taxonomy has been developed for outcomes in medical research to help improve knowledge discovery. *J Clin Epidemiol.* 2018;96:84-92.

## Supplementary file 4. Included Studies

|    | Study title                                                                                                                                                                                                   | First author  | Year of publication |
|----|---------------------------------------------------------------------------------------------------------------------------------------------------------------------------------------------------------------|---------------|---------------------|
| 1  | Effectiveness and safety of home-based muscle electrical stimulator in brachial plexus Injury patient(Limthongthang et al., 2014)                                                                             | Limthongthang | 2014                |
| 2  | Elbow proprioception sense in total arm -type brachial plexus injured patients after neurotisation: a preliminary study(Homsreprasert et al., 2014)                                                           | Homreprasert  | 2014                |
| 3  | Comparison between the anterior and posterior approach for transfer of the spinal accessory nerve to the suprascapular nerve in late traumatic brachial plexus injuries (Souza et al., 2014)                  | Souza         | 2014                |
| 4  | Ultrasound-guided peripheral nerve stimulation for neuropathic pain after brachial plexus injury: two case reports(Kim et al., 2017)                                                                          | Kim           | 2017                |
| 5  | Contralateral lower trapezius transfer for restoration of shoulder external rotation in traumatic brachial plexus palsy: preliminary report and literature review(Satbhai et al., 2014)                       | Satbhai       | 2014                |
| 6  | Restoration of shoulder abduction in brachial plexus avulsion injuries with double neurotization from the spinal accessory nerve: a report of 13 cases(Huan et al., 2017)                                     | Huan          | 2017                |
| 7  | Transfer of the musculocutaneous nerve branch to the brachialis muscle to the triceps for elbow extension: anatomical study and report of five cases(Bertelli et al., 2017)                                   | Bertelli      | 2017                |
| 8  | Posterior approach for accessory to suprascapular nerve transfer: an electrophysiological outcomes study(Rui et al., 2013)                                                                                    | Rui           | 2013                |
| 9  | Reliability of functioning free muscle transfer and vascularized ulnar nerve grafting for elbow flexion in complete brachial plexus palsy (Potter and Ferris, 2017)                                           | Potter        | 2017                |
| 10 | Management of infraclavicular (Chuang Level IV) brachial plexus injuries: A single surgeon experience with 75 cases (Lam et al., 2015)                                                                        | Lam           | 2015                |
| 11 | Functioning free muscle transfer for the restoration of elbow flexion in brachial plexus injury patients (Estrella and Montales 2016)                                                                         | Estrella      | 2016                |
| 12 | Radial to axillary nerve transfers: A combined case series(Desai et al., 2016)                                                                                                                                | Desai         | 2016                |
| 13 | Thalamic deep brain stimulation for neuropathic pain after amputation or brachial plexus avulsion(Pereira et al., 2013)                                                                                       | Pereira       | 2013                |
| 14 | Nerve transfers for shoulder function for traumatic brachial plexus injuries(Estrella et al., 2014)                                                                                                           | Estrella      | 2014                |
| 15 | Results of operative treatment of brachial plexus injury resulting from shoulder dislocation: A study with a long-term follow-up(Gutkowska et al., 2017)                                                      | Gutkowska     | 2017                |
| 16 | Surgical treatment of brachial plexus posterior cord lesion: A combination of nerve and tendon transfers, about nine patients(Oberlin., 2013)                                                                 | Oberlin       | 2013                |
| 17 | The medial cord to musculocutaneous (MCMc) nerve transfer: a new method to reanimate elbow flexion after C5-C6-C7-(C8) avulsive injuries of the brachial plexus—technique and results(Ferraresi et al., 2014) | Ferraresi     | 2014                |



## Supplementary file 4. Included Studies

|    |           |                                                                                                                                                                                                                                         |                 |         |
|----|-----------|-----------------------------------------------------------------------------------------------------------------------------------------------------------------------------------------------------------------------------------------|-----------------|---------|
| 1  |           |                                                                                                                                                                                                                                         |                 |         |
| 2  |           |                                                                                                                                                                                                                                         |                 |         |
| 3  | <b>18</b> | Transfer of a terminal motor branch nerve to the flexor carpi ulnaris for triceps reinnervation: anatomical study and clinical cases(Bertelli et al., 2015)                                                                             | Bertelli        | 2015    |
| 4  |           |                                                                                                                                                                                                                                         |                 |         |
| 5  |           |                                                                                                                                                                                                                                         |                 |         |
| 6  |           |                                                                                                                                                                                                                                         |                 |         |
| 7  | <b>19</b> | Free functioning gracilis muscle transfer with and without simultaneous intercostal nerve transfer to musculocutaneous nerve for restoration of elbow flexion after traumatic adult brachial pan-plexus injury(Maldonado et al., 2017a) | Maldonado       | 2017(a) |
| 8  |           |                                                                                                                                                                                                                                         |                 |         |
| 9  |           |                                                                                                                                                                                                                                         |                 |         |
| 10 |           |                                                                                                                                                                                                                                         |                 |         |
| 11 |           |                                                                                                                                                                                                                                         |                 |         |
| 12 | <b>20</b> | Isolated latissimus dorsi transfer to restore shoulder external rotation in adults with brachial plexus injury(Ghosh et al., 2013)                                                                                                      | Ghosh           | 2013    |
| 13 |           |                                                                                                                                                                                                                                         |                 |         |
| 14 | <b>21</b> | Functional outcome and quality of life after traumatic total brachial plexus injury treated by nerve transfer or single/double free muscle transfers(Satbhai et al., 2016)                                                              | Satbhai         | 2016    |
| 15 |           |                                                                                                                                                                                                                                         |                 |         |
| 16 |           |                                                                                                                                                                                                                                         |                 |         |
| 17 |           |                                                                                                                                                                                                                                         |                 |         |
| 18 | <b>22</b> | Successful graded mirror therapy in a patient with chronic deafferentation pain in whom traditional mirror therapy was ineffective: A case report(Mibu et al., 2016)                                                                    | Mibu            | 2016    |
| 19 |           |                                                                                                                                                                                                                                         |                 |         |
| 20 |           |                                                                                                                                                                                                                                         |                 |         |
| 21 |           |                                                                                                                                                                                                                                         |                 |         |
| 22 | <b>23</b> | Bipolar Transfer of Latissimus Dorsi Myocutaneous Flap for Restoration of Elbow Flexion in Late Traumatic Brachial Plexus Injury: Evaluation of 13 Cases(Azab et al., 2017)                                                             | Azab            | 2017    |
| 23 |           |                                                                                                                                                                                                                                         |                 |         |
| 24 |           |                                                                                                                                                                                                                                         |                 |         |
| 25 |           |                                                                                                                                                                                                                                         |                 |         |
| 26 | <b>24</b> | Comparison of objective muscle strength in C5-C6 and C5-C7 brachial plexus injury patients after double nerve transfer (Tsai et al. 2015)                                                                                               | Tsai            | 2014    |
| 27 |           |                                                                                                                                                                                                                                         |                 |         |
| 28 | <b>25</b> | Phantom remodeling effect of dorsal root entry zone lesioning in phantom limb pain caused by brachial plexus avulsion(Son et al., 2015)                                                                                                 | Son             | 2015    |
| 29 |           |                                                                                                                                                                                                                                         |                 |         |
| 30 |           |                                                                                                                                                                                                                                         |                 |         |
| 31 | <b>26</b> | Comparison of surgical strategies between proximal nerve graft and/or nerve transfer and distal nerve transfer based on functional restoration of elbow flexion: A retrospective review of 147 patients(Hu et al., 2018)                | Hu              | 2018    |
| 32 |           |                                                                                                                                                                                                                                         |                 |         |
| 33 |           |                                                                                                                                                                                                                                         |                 |         |
| 34 |           |                                                                                                                                                                                                                                         |                 |         |
| 35 | <b>27</b> | Reconstruction of shoulder abduction by multiple nerve fascicle transfer through posterior approach(Ren et al., 2013)                                                                                                                   | Ren             | 2013    |
| 36 |           |                                                                                                                                                                                                                                         |                 |         |
| 37 |           |                                                                                                                                                                                                                                         |                 |         |
| 38 | <b>28</b> | Intercostal nerve transfer to neurotize the musculocutaneous nerve after traumatic brachial plexus avulsion: A comparison of two, three, and four nerve transfers(Xiao et al., 2014)                                                    | Xiao            | 2014    |
| 39 |           |                                                                                                                                                                                                                                         |                 |         |
| 40 |           |                                                                                                                                                                                                                                         |                 |         |
| 41 |           |                                                                                                                                                                                                                                         |                 |         |
| 42 | <b>29</b> | Use of the DEKA Arm for amputees with brachial plexus injury: A case series(Resnik et al., 2017)                                                                                                                                        | Resnik          | 2017    |
| 43 |           |                                                                                                                                                                                                                                         |                 |         |
| 44 | <b>30</b> | Polyester tape scapulopexy for chronic upper extremity brachial plexus injury(Leechavengvongs et al., 2015)                                                                                                                             | Leechavengvongs | 2015    |
| 45 |           |                                                                                                                                                                                                                                         |                 |         |
| 46 |           |                                                                                                                                                                                                                                         |                 |         |
| 47 | <b>31</b> | Contralateral C7 nerve transfer with direct coaptation to restore lower trunk function after traumatic brachial plexus avulsion(Wang et al., 2013)                                                                                      | Wang            | 2013    |
| 48 |           |                                                                                                                                                                                                                                         |                 |         |
| 49 |           |                                                                                                                                                                                                                                         |                 |         |
| 50 | <b>32</b> | Outcome of surgical reconstruction after traumatic total brachial plexus palsy(Dodakundi et al., 2013)                                                                                                                                  | Dodakundi       | 2013    |
| 51 |           |                                                                                                                                                                                                                                         |                 |         |
| 52 |           |                                                                                                                                                                                                                                         |                 |         |
| 53 | <b>33</b> | Bionic reconstruction to restore hand function after brachial plexus injury: a case series of three patients(Aszmann et al., 2015)                                                                                                      | Aszmann         | 2015    |
| 54 |           |                                                                                                                                                                                                                                         |                 |         |
| 55 | <b>34</b> | Surgical treatment of the plexus brachialis injury using long-lasting electrostimulation (Tsymbaliuk and Tretiak, 2013)                                                                                                                 | Tsymbalyuk      | 2013    |
| 56 |           |                                                                                                                                                                                                                                         |                 |         |
| 57 |           |                                                                                                                                                                                                                                         |                 |         |
| 58 | <b>35</b> | Phrenic nerve transfer for reconstruction of elbow extension in severe brachial plexus injuries(Flores and Socolovsky, 2016)                                                                                                            | Flores          | 2016    |
| 59 |           |                                                                                                                                                                                                                                         |                 |         |
| 60 |           |                                                                                                                                                                                                                                         |                 |         |

## Supplementary file 4. Included Studies

|    |           |                                                                                                                                                                                                          |                |
|----|-----------|----------------------------------------------------------------------------------------------------------------------------------------------------------------------------------------------------------|----------------|
| 1  |           |                                                                                                                                                                                                          |                |
| 2  |           |                                                                                                                                                                                                          |                |
| 3  | <b>36</b> | Direct coaptation of the phrenic nerve with the posterior division of the lower trunk to restore finger and elbow extension function in patients with total brachial plexus injuries( Wang et al., 2016) | Wang 2016      |
| 4  |           |                                                                                                                                                                                                          |                |
| 5  |           |                                                                                                                                                                                                          |                |
| 6  |           |                                                                                                                                                                                                          |                |
| 7  |           |                                                                                                                                                                                                          |                |
| 8  | <b>37</b> | A prospective study comparing single and double fascicular transfer to restore elbow flexion after brachial plexus injury(Martins et al., 2013)                                                          | Martins 2013   |
| 9  |           |                                                                                                                                                                                                          |                |
| 10 | <b>38</b> | Chronic post-traumatic neuropathic pain of brachial plexus and upper limb: a new technique of peripheral nerve stimulation(Stevanato et al., 2014)                                                       | Stevanato 2014 |
| 11 |           |                                                                                                                                                                                                          |                |
| 12 |           |                                                                                                                                                                                                          |                |
| 13 |           |                                                                                                                                                                                                          |                |
| 14 | <b>39</b> | Effectiveness of contralateral C7 nerve root and multiple nerve transfer for treatment of brachial plexus root avulsion(Wei et al., 2014)                                                                | Wei 2014       |
| 15 |           |                                                                                                                                                                                                          |                |
| 16 | <b>40</b> | Combined proximal nerve graft and distal nerve transfer for a posterior cord brachial plexus injury(Plate et al., 2013)                                                                                  | Plate 2013     |
| 17 |           |                                                                                                                                                                                                          |                |
| 18 |           |                                                                                                                                                                                                          |                |
| 19 | <b>41</b> | The role of elective amputation in patients with traumatic brachial plexus injury(Maldonado et al., 2016b)                                                                                               | Maldonado 2016 |
| 20 |           |                                                                                                                                                                                                          |                |
| 21 | <b>42</b> | Early microsurgical management of clavicular fracture combined with brachial plexus injury( Liu et al., 2014)                                                                                            | Liu 2014(a)    |
| 22 |           |                                                                                                                                                                                                          |                |
| 23 |           |                                                                                                                                                                                                          |                |
| 24 | <b>43</b> | Contralateral trapezius transfer to restore shoulder external rotation following adult brachial plexus injury (Elhassan et al., 2016)                                                                    | Elhassan 2016  |
| 25 |           |                                                                                                                                                                                                          |                |
| 26 | <b>44</b> | Comparative study of phrenic nerve transfers with and without nerve graft for elbow flexion after global brachial plexus injury(Liu et al., 2014)                                                        | Liu 2014       |
| 27 |           |                                                                                                                                                                                                          |                |
| 28 |           |                                                                                                                                                                                                          |                |
| 29 |           |                                                                                                                                                                                                          |                |
| 30 | <b>45</b> | Shoulder and elbow recovery at 2 and 11 years following brachial plexus reconstruction( Wang et al., 2016)                                                                                               | Wang 2016      |
| 31 |           |                                                                                                                                                                                                          |                |
| 32 | <b>46</b> | Functional outcomes after treatment of traumatic brachial plexus injuries: clinical study(Aras et al., 2013)                                                                                             | Aras 2013      |
| 33 |           |                                                                                                                                                                                                          |                |
| 34 |           |                                                                                                                                                                                                          |                |
| 35 | <b>47</b> | Free gracilis transfer reinnervated by the nerve to the supinator for the reconstruction of finger and thumb extension in longstanding C7-T1 brachial plexus root avulsion(Soldado et al., 2013)         | Soldado 2013   |
| 36 |           |                                                                                                                                                                                                          |                |
| 37 |           |                                                                                                                                                                                                          |                |
| 38 | <b>48</b> | Restoration of hand function in C7–T1 brachial plexus palsies using a staged approach with nerve and tendon transfer(Zhang et al., 2014)                                                                 | Zhang 2014     |
| 39 |           |                                                                                                                                                                                                          |                |
| 40 | <b>49</b> | Neurotization to innervate the deltoid and biceps: 3 cases(Dy et al., 2013)                                                                                                                              | Dy 2013        |
| 41 |           |                                                                                                                                                                                                          |                |
| 42 |           |                                                                                                                                                                                                          |                |
| 43 | <b>50</b> | Arthroscopic arthrodesis of the shoulder in brachial plexus palsy(Lenoir et al., 2017)                                                                                                                   | Lenoir 2017    |
| 44 |           |                                                                                                                                                                                                          |                |
| 45 |           |                                                                                                                                                                                                          |                |
| 46 | <b>51</b> | Outcome of contralateral C7 nerve transferring to median nerve(Kai-ming Gao et al., 2013)                                                                                                                | Gao 2013       |
| 47 |           |                                                                                                                                                                                                          |                |
| 48 | <b>52</b> | Intercostal nerve transfer to the biceps motor branch in complete traumatic brachial plexus injuries (Cho et al., 2015)                                                                                  | Cho 2015       |
| 49 |           |                                                                                                                                                                                                          |                |
| 50 |           |                                                                                                                                                                                                          |                |
| 51 | <b>53</b> | Tactile feedback for relief of deafferentation pain using virtual reality system: a pilot study(Sano et al., 2016)                                                                                       | Sano 2016      |
| 52 |           |                                                                                                                                                                                                          |                |
| 53 | <b>54</b> | Functioning free gracilis transfer to reconstruct elbow flexion and quality of life in global brachial plexus injured patients(Yang et al., 2016)                                                        | Yang 2016      |
| 54 |           |                                                                                                                                                                                                          |                |
| 55 |           |                                                                                                                                                                                                          |                |
| 56 |           |                                                                                                                                                                                                          |                |
| 57 |           |                                                                                                                                                                                                          |                |
| 58 |           |                                                                                                                                                                                                          |                |
| 59 |           |                                                                                                                                                                                                          |                |
| 60 |           |                                                                                                                                                                                                          |                |

## Supplementary file 4. Included Studies

|    |    |                                                                              |             |      |
|----|----|------------------------------------------------------------------------------|-------------|------|
| 1  |    |                                                                              |             |      |
| 2  |    |                                                                              |             |      |
| 3  | 55 | Evaluation of infraspinatus reinnervation and function following spinal      | Baltzer     | 2017 |
| 4  |    | accessory nerve to suprascapular nerve transfer in adult traumatic           |             |      |
| 5  |    | brachial plexus injuries(Baltzer et al., 2017)                               |             |      |
| 6  |    |                                                                              |             |      |
| 7  | 56 | Anatomic study of the intercostal nerve transfer to the suprascapular        | Hu          | 2014 |
| 8  |    | nerve and a case report(Hu et al., 2014)                                     |             |      |
| 9  |    |                                                                              |             |      |
| 10 | 57 | Shoulder abduction and external rotation restoration with nerve              | Kostas-     | 2013 |
| 11 |    | transfer(Kostas-Agnantis et al., 2013)                                       | Agnantis    |      |
| 12 | 58 | Contralateral C-7 transfer: is direct repair really superior to              | Bhatia      | 2017 |
| 13 |    | grafting?(Bhatia et al., 2017)                                               |             |      |
| 14 | 59 | Impact of phrenic nerve paralysis on the surgical outcome of                 | Kita        | 2015 |
| 15 |    | intercostal nerve transfer(Kita et al., 2015)                                |             |      |
| 16 |    |                                                                              |             |      |
| 17 | 60 | Flow-through anastomosis using a T-shaped vascular pedicle for               | Hou         | 2015 |
| 18 |    | gracilis functioning free muscle transplantation in brachial plexus          |             |      |
| 19 |    | injury(Hou et al., 2015)                                                     |             |      |
| 20 |    |                                                                              |             |      |
| 21 | 61 | Free functional muscle transfer tendon insertion secondary                   | Sechachalam | 2017 |
| 22 |    | advancement procedure to improve elbow flexion(Sechachalam et al.,           |             |      |
| 23 |    | 2017)                                                                        |             |      |
| 24 | 62 | Dual nerve transfers for restoration of shoulder function after brachial     | Chu         | 2016 |
| 25 |    | plexus avulsion injury(Chu et al., 2016)                                     |             |      |
| 26 |    |                                                                              |             |      |
| 27 | 63 | Cortical plasticity after brachial plexus injury and repair: a resting-state | Bhat        | 2017 |
| 28 |    | functional MRI study(Bhat et al., 2017)                                      |             |      |
| 29 | 64 | Results of spinal accessory to suprascapular nerve transfer in 110           | Bertelli    | 2016 |
| 30 |    | patients with complete palsy of the brachial plexus(Bertelli et al., 2016)   |             |      |
| 31 |    |                                                                              |             |      |
| 32 | 65 | Magnetic resonance neurographic and clinical long-term results after         | Frueh       | 2017 |
| 33 |    | oberlins transfer for adult brachial plexus injuries(Frueh et al., 2017)     |             |      |
| 34 | 66 | Free functioning gracilis muscle transfer versus intercostal nerve           | Maldonado   | 2016 |
| 35 |    | transfer to musculocutaneous nerve for restoration of elbow flexion          |             |      |
| 36 |    | after traumatic adult brachial pan-plexus injury(Maldonado et al.,           |             |      |
| 37 |    | 2016a)                                                                       |             |      |
| 38 |    |                                                                              |             |      |
| 39 | 67 | Results of wrist extension reconstruction in C5–8 brachial plexus palsy      | Bertelli    | 2016 |
| 40 |    | by transferring the pronator quadratus motor branch to the extensor          |             |      |
| 41 |    | carpi radialis brevis muscle(Bertelli et al., 2016)                          |             |      |
| 42 |    |                                                                              |             |      |
| 43 | 68 | Donor nerve sources in free functional gracilis muscle transfer for          | Nicoson     | 2017 |
| 44 |    | elbow flexion in adult brachial plexus injury(Nicoson et al., 2017)          |             |      |
| 45 | 69 | Use of contralateral spinal accessory nerve for ipsilateral suprascapular    | Bhandari    | 2016 |
| 46 |    | neurotization in global brachial plexus injury: a new                        |             |      |
| 47 |    | technique(Bhandari and Deb, 2016)                                            |             |      |
| 48 |    |                                                                              |             |      |
| 49 | 70 | Objective evaluation of elbow flexion strength and fatigability after        | Marcicq     | 2014 |
| 50 |    | nerve transfer in adult traumatic brachial plexus injuries (Maricq et al.,   |             |      |
| 51 |    | 2014)                                                                        |             |      |
| 52 |    |                                                                              |             |      |
| 53 | 71 | Outcomes of muscle brachialis transfer to restore finger flexion in          | DeGeorge    | 2017 |
| 54 |    | brachial plexus palsy(DeGeorge et al., 2017)                                 |             |      |
| 55 | 72 | Functional outcome of nerve transfers for traumatic global brachial          | Liu         | 2013 |
| 56 |    | plexus avulsion(Liu et al., 2013)                                            |             |      |
| 57 |    |                                                                              |             |      |
| 58 |    |                                                                              |             |      |
| 59 |    |                                                                              |             |      |
| 60 |    |                                                                              |             |      |

## Supplementary file 4. Included Studies

|    |           |                                                                                                                                                                                                                                                    |                |      |
|----|-----------|----------------------------------------------------------------------------------------------------------------------------------------------------------------------------------------------------------------------------------------------------|----------------|------|
| 1  |           |                                                                                                                                                                                                                                                    |                |      |
| 2  |           |                                                                                                                                                                                                                                                    |                |      |
| 3  | <b>73</b> | Transfer of a flexor digitorum superficialis motor branch for wrist extension reconstruction in C5-C8 root injuries of the brachial plexus: a case series(Bertelli and Ghizoni, 2013)                                                              | Bertelli       | 2013 |
| 4  |           |                                                                                                                                                                                                                                                    |                |      |
| 5  |           |                                                                                                                                                                                                                                                    |                |      |
| 6  |           |                                                                                                                                                                                                                                                    |                |      |
| 7  | <b>74</b> | Outcome after transfer of intercostal nerves to the nerve of triceps long head in 25 adult patients with total plexus root avulsion injury(KaiMing Gao et al., 2013)                                                                               | Gao            | 2013 |
| 8  |           |                                                                                                                                                                                                                                                    |                |      |
| 9  |           |                                                                                                                                                                                                                                                    |                |      |
| 10 |           |                                                                                                                                                                                                                                                    |                |      |
| 11 | <b>75</b> | Good sensory recovery of the hand in brachial plexus surgery using the intercostobrachial nerve as the donor(Foroni et al., 2017)                                                                                                                  | Foroni         | 2017 |
| 12 |           |                                                                                                                                                                                                                                                    |                |      |
| 13 | <b>76</b> | The phrenic nerve as a donor for brachial plexus injuries: is it safe and effective? Case series and literature analysis(Socolovsky et al., 2015)                                                                                                  | Socolovsky     | 2015 |
| 14 |           |                                                                                                                                                                                                                                                    |                |      |
| 15 |           |                                                                                                                                                                                                                                                    |                |      |
| 16 | <b>77</b> | Complete avulsion of brachial plexus with associated vascular trauma: Feasibility of reconstruction using the double free muscle technique(Hattori et al., 2013)                                                                                   | Hattori        | 2013 |
| 17 |           |                                                                                                                                                                                                                                                    |                |      |
| 18 |           |                                                                                                                                                                                                                                                    |                |      |
| 19 | <b>78</b> | Long-term outcome of brachial plexus re-implantation after complete brachial plexus avulsion injury(Kachramanoglou et al., 2017)                                                                                                                   | Kachramanoglou | 2017 |
| 20 |           |                                                                                                                                                                                                                                                    |                |      |
| 21 |           |                                                                                                                                                                                                                                                    |                |      |
| 22 | <b>79</b> | Force recovery assessment of functioning free muscle transfers using ultrasonography(Kodama et al., 2014)                                                                                                                                          | Kodama         | 2014 |
| 23 |           |                                                                                                                                                                                                                                                    |                |      |
| 24 | <b>80</b> | Rhomboid nerve transfer to the suprascapular nerve for shoulder reanimation in brachial plexus palsy: A clinical report(Goubier and Teboul, 2016)                                                                                                  | Goubier        | 2016 |
| 25 |           |                                                                                                                                                                                                                                                    |                |      |
| 26 |           |                                                                                                                                                                                                                                                    |                |      |
| 27 |           |                                                                                                                                                                                                                                                    |                |      |
| 28 | <b>81</b> | Outcome of contralateral C7 transfer to two recipient nerves in 22 patients with the total brachial plexus avulsion injury(Kaiming et al., 2013)                                                                                                   | Gao            | 2013 |
| 29 |           |                                                                                                                                                                                                                                                    |                |      |
| 30 |           |                                                                                                                                                                                                                                                    |                |      |
| 31 |           |                                                                                                                                                                                                                                                    |                |      |
| 32 | <b>82</b> | Comparative study of phrenic and intercostal nerve transfers for elbow flexion after global brachial plexus injury(Yuzhou et al., 2015)                                                                                                            | Liu            | 2015 |
| 33 |           |                                                                                                                                                                                                                                                    |                |      |
| 34 | <b>83</b> | Donor-side morbidity after contralateral C-7 nerve transfer: results at a minimum of 6 months after surgery( Li et al., 2016)                                                                                                                      | Li             | 2016 |
| 35 |           |                                                                                                                                                                                                                                                    |                |      |
| 36 |           |                                                                                                                                                                                                                                                    |                |      |
| 37 | <b>84</b> | Outcome after brachial plexus injury surgery and impact on quality of life(Rasulic et al., 2017)                                                                                                                                                   | Rasulić        | 2017 |
| 38 |           |                                                                                                                                                                                                                                                    |                |      |
| 39 | <b>85</b> | Pronator teres branch transfer to the anterior interosseous nerve for treating C8T1 brachial plexus avulsion: An anatomic study and case report(Yang et al., 2014)                                                                                 | Yang           | 2014 |
| 40 |           |                                                                                                                                                                                                                                                    |                |      |
| 41 |           |                                                                                                                                                                                                                                                    |                |      |
| 42 |           |                                                                                                                                                                                                                                                    |                |      |
| 43 | <b>86</b> | Operative treatment with nerve repair can restore function in patients with traction injuries in the brachial plexus(Stiasny et al., 2015)                                                                                                         | Stiasny        | 2015 |
| 44 |           |                                                                                                                                                                                                                                                    |                |      |
| 45 | <b>87</b> | Thoracodorsal nerve transfer for triceps reinnervation in partial brachial plexus injuries(Soldado et al., 2016)                                                                                                                                   | Soldado        | 2016 |
| 46 |           |                                                                                                                                                                                                                                                    |                |      |
| 47 |           |                                                                                                                                                                                                                                                    |                |      |
| 48 | <b>88</b> | Co-infusion of autologous adipose tissue derived neuronal differentiated mesenchymal stem cells and bone marrow derived hematopoietic stem cells, a viable therapy for post-traumatic brachial plexus injury: a case report (Thakkar et al., 2014) | Thakkar        | 2014 |
| 49 |           |                                                                                                                                                                                                                                                    |                |      |
| 50 |           |                                                                                                                                                                                                                                                    |                |      |
| 51 |           |                                                                                                                                                                                                                                                    |                |      |
| 52 |           |                                                                                                                                                                                                                                                    |                |      |
| 53 | <b>89</b> | Long-term clinical outcomes of spinal accessory nerve transfer to the suprascapular nerve in patients with brachial plexus palsy(Emamhadi et al., 2016)                                                                                            | Emamhadi       | 2016 |
| 54 |           |                                                                                                                                                                                                                                                    |                |      |
| 55 |           |                                                                                                                                                                                                                                                    |                |      |
| 56 | <b>90</b> | Surgical treatment for total root avulsion type brachial plexus injuries by neurotisation: a prospective comparison study between total and hemicentralateral C7 nerve root transfer(Tu et al., 2014)                                              | Tu             | 2014 |
| 57 |           |                                                                                                                                                                                                                                                    |                |      |
| 58 |           |                                                                                                                                                                                                                                                    |                |      |
| 59 |           |                                                                                                                                                                                                                                                    |                |      |
| 60 |           |                                                                                                                                                                                                                                                    |                |      |

## Supplementary file 4. Included Studies

|    |            |                                                                            |                |      |
|----|------------|----------------------------------------------------------------------------|----------------|------|
| 1  |            |                                                                            |                |      |
| 2  |            |                                                                            |                |      |
| 3  | <b>91</b>  | Deactivation of distant pain-related regions induced by 20-day rTMS: a     | Qiu            | 2014 |
| 4  |            | case study of one-week pain relief for long-term intractable               |                |      |
| 5  |            | deafferentation pain (Qiu et al., 2014)                                    |                |      |
| 6  |            |                                                                            |                |      |
| 7  | <b>92</b>  | End-to-side neuroorrhaphy in brachial plexus reconstruction(Haninec et     | Haninec        | 2013 |
| 8  |            | al., 2013)                                                                 |                |      |
| 9  |            |                                                                            |                |      |
| 10 | <b>93</b>  | Reanimation of elbow extension with medial pectoral nerve transfer in      | Flores         | 2013 |
| 11 |            | partial injuries to the brachial plexus (Flores., 2013)                    |                |      |
| 12 | <b>94</b>  | Early post-operative results after repair of traumatic brachial plexus     | Mohammad-      | 2013 |
| 13 |            | palsy(Mohammad-Reda., 2013)                                                | Reda           |      |
| 14 | <b>95</b>  | Satisfied patients after shoulder arthrodesis for brachial plexus lesions  | van der Lingen | 2018 |
| 15 |            | even after 20 years of follow-up(van der Lingen et al., 2018)              |                |      |
| 16 |            |                                                                            |                |      |
| 17 | <b>96</b>  | Posterior branch of the axillary nerve transfer to the lateral triceps     | Kilka          | 2013 |
| 18 |            | branch for restoration of elbow extension: case report(Klika et al.,       |                |      |
| 19 |            | 2013)                                                                      |                |      |
| 20 |            |                                                                            |                |      |
| 21 | <b>97</b>  | Clinical analysis of repairing the whole brachial plexus nerve root        | Liu            | 2014 |
| 22 |            | avulsion by transferring C7 nerve root from the uninjured side(Liu et      |                |      |
| 23 |            | al., 2014)                                                                 |                |      |
| 24 | <b>98</b>  | Bipolar transfer of the pectoralis major muscle for restoration of elbow   | Cambon-Binder  | 2018 |
| 25 |            | flexion in 29 cases(Cambon-Binder et al., 2018)                            |                |      |
| 26 |            |                                                                            |                |      |
| 27 | <b>99</b>  | Thoracodorsal nerve transfer for elbow flexion reconstruction in           | Soldado        | 2014 |
| 28 |            | infraclavicular brachial plexus injuries(Soldado et al., 2014)             |                |      |
| 29 |            |                                                                            |                |      |
| 30 | <b>100</b> | Median nerve fascicle transfer versus ulnar nerve fascicle transfer to     | Cho            | 2014 |
| 31 |            | the biceps motor branch in C5-C6 and C5-C7 brachial plexus injuries:       |                |      |
| 32 |            | nonrandomised prospective study of 23 consecutive patients(Cho et          |                |      |
| 33 |            | al., 2014)                                                                 |                |      |
| 34 | <b>101</b> | Free functional muscle transplantation of an anomalous femoral             | Kaizawa        | 2013 |
| 35 |            | adductor with a very large muscle belly: a case report(Kaizawa et al.,     |                |      |
| 36 |            | 2013)                                                                      |                |      |
| 37 |            |                                                                            |                |      |
| 38 | <b>102</b> | Selective neurotisation of the radial nerve in the axilla using the        | Tuohuti        | 2016 |
| 39 |            | intercostal nerve to treat complete brachial plexus palsy(Tuohuti et al.,  |                |      |
| 40 |            | 2016)                                                                      |                |      |
| 41 |            |                                                                            |                |      |
| 42 | <b>103</b> | Objective predictors of functional recovery associated with intercostal    | Flores         | 2016 |
| 43 |            | nerves transfer for triceps reinnervation in global brachial plexus        |                |      |
| 44 |            | palsy(Flores., 2016)                                                       |                |      |
| 45 | <b>104</b> | Nerve transfer to relieve pain in upper brachial plexus injuries: does it  | Emamhadi       | 2017 |
| 46 |            | work? (Emamhadi., 2017)                                                    |                |      |
| 47 |            |                                                                            |                |      |
| 48 | <b>105</b> | Phrenic nerve transfer versus intercostal nerve transfer for the repair    | Abdixbir       | 2016 |
| 49 |            | of brachial plexus root avulsion injuries(Abdixbir et al., 2016)           |                |      |
| 50 | <b>106</b> | End-to-side neuroorrhaphy to restore elbow flexion in brachial plexus      | Limthongthang  | 2016 |
| 51 |            | injury(Limthongthang et al., 2016)                                         |                |      |
| 52 |            |                                                                            |                |      |
| 53 | <b>107</b> | Chordata method combined with electrotherapy in functional recovery        | De Oliveira    | 2016 |
| 54 |            | after brachial plexus injury:report of three clinical cases(De Oliveira et |                |      |
| 55 |            | al., 2016)                                                                 |                |      |
| 56 | <b>108</b> | Clinical outcome following transfer of the supinator motor branch to       | Xu             | 2015 |
| 57 |            | the posterior interosseous nerve in patients with C7-T1 brachial plexus    |                |      |
| 58 |            | palsy(Xu et al., 2015)                                                     |                |      |
| 59 |            |                                                                            |                |      |
| 60 |            |                                                                            |                |      |

## Supplementary file 4. Included Studies

|     |                                                                                                                                                                                                                                                                  |            |         |
|-----|------------------------------------------------------------------------------------------------------------------------------------------------------------------------------------------------------------------------------------------------------------------|------------|---------|
| 109 | Transposition of branches of radial nerve innervating supinator to posterior interosseous nerve for functional reconstruction of finger and thumb extension in 4 patients with middle and lower trunk root avulsion injuries of brachial plexus(Wu et al., 2017) | Wu         | 2017    |
| 110 | Electromyographic findings in gracilis muscle grafts used to augment elbow flexion in traumatic brachial plexopathy(Kazamel and Sorenson, 2016)                                                                                                                  | Kazamel    | 2016    |
| 111 | Double distal intraneural fascicular nerve transfers for lower brachial plexus injuries(Li et al., 2016)                                                                                                                                                         | Li         | 2016    |
| 112 | Restoration of elbow and hand function in total brachial plexus palsy with intercostal nerves and C5 root neurotisation. Results in 21 patients(Arnal et al., 2016)                                                                                              | Amal       | 2016    |
| 113 | The phrenic nerve transfer in the treatment of a septuagenarian with brachial plexus avulsion injury: a case study(Jiang and Lao, 2018)                                                                                                                          | Jiang      | 2018    |
| 114 | Outcomes of transferring a healthy motor fascicle from the radial nerve to a branch for the triceps to recover elbow extension in partial brachial plexus palsy(Flores., 2017)                                                                                   | Flores     | 2017    |
| 115 | Successful nerve transfers for traumatic brachial plexus palsy in a septuagenarian(Johnsen and Wolfe, 2016)                                                                                                                                                      | Johnsen    | 2016    |
| 116 | Free functioning gracilis muscle transfer for elbow flexion reconstruction after traumatic brachial pan-plexus injury: Where is the optimal distal tendon attachment for elbow flexion?(Maldonado et al., 2017b)                                                 | Maldonado  | 2017(b) |
| 117 | Results of distal nerve transfers in restoration of shoulder function in C5 and C6 root avulsion injury to the brachial plexus (Bhandari., 2017)                                                                                                                 | Bhandari   | 2017    |
| 118 | Bipolar dual-lead spinal cord stimulation between two electrodes on the ventral and dorsal sides of the spinal cord: consideration of putative mechanisms(Watanabe et al., 2018)                                                                                 | Watanabe   | 2018    |
| 119 | Triceps nerve to deltoid nerve transfer after an unsatisfactory intra-plexus neurotisation of the posterior division of the upper trunk(Al-Qattan et al., 2017)                                                                                                  | Al-Qattan  | 2017    |
| 120 | Trapezius muscle transfer for restoration of elbow extension in a traumatic brachial plexus injury(Alrabai et al., 2018)                                                                                                                                         | Alrabai    | 2018    |
| 121 | Transfer of the radial nerve branch to the extensor carpi radialis brevis to the anterior interosseous nerve to reconstruct thumb and finger flexion(Bertelli., 2015)                                                                                            | Bertelli   | 2015    |
| 122 | Ultrasound-guided pulse-dose radiofrequency: treatment of neuropathic pain after brachial plexus lesion and arm vascularisation(Magistrone et al., 2014)                                                                                                         | Magistrone | 2014    |
| 123 | Phrenic nerve transfer to the musculocutaneous nerve for the repair of brachial plexus injury: electrophysiological characteristics(Liu et al., 2015)                                                                                                            | Liu        | 2015    |
| 124 | Postoperative motor deficits following elbow flexion reanimation by nerve transfer( Hanneur et al., 2018)                                                                                                                                                        | Hanneur    | 2018    |

## Supplementary file 4. Included Studies

|    |            |                                                                          |            |      |
|----|------------|--------------------------------------------------------------------------|------------|------|
| 1  |            |                                                                          |            |      |
| 2  |            |                                                                          |            |      |
| 3  | <b>125</b> | Comparative study of phrenic and partial ulnar nerve transfers for       | Liu        | 2018 |
| 4  |            | elbow flexion after upper brachial plexus avulsion-a retrospective       |            |      |
| 5  |            | clinical analysis(Liu et al., 2018)                                      |            |      |
| 6  |            |                                                                          |            |      |
| 7  | <b>126</b> | Contralateral medial pectoral nerve transfer with free gracilis muscle   | Yavari     | 2018 |
| 8  |            | transfer in old brachial plexus injury(Yavari et al., 2018)              |            |      |
| 9  |            |                                                                          |            |      |
| 10 | <b>127</b> | MEG-BMI to control phantom limb pain(Yanagisawa et al., 2018)            | Yanagisawa | 2018 |
| 11 | <b>128</b> | Complete brachial plexus injury- an amputation dilemma, A case           | Choong     | 2015 |
| 12 |            | report(Choong and Shalimar, 2015)                                        |            |      |
| 13 | <b>129</b> | Reversal of phantom pain and hand-to-face remapping after brachial       | Tsao       | 2016 |
| 14 |            | plexus avulsion(Tsao and Finn, 2016)                                     |            |      |
| 15 |            |                                                                          |            |      |
| 16 | <b>130</b> | A newly developed upper limb single-joint HAL in a patient with elbow    | Kubota     | 2017 |
| 17 |            | flexion reconstruction after traumatic brachial plexus injury: A case    |            |      |
| 18 |            | report(Kubota et al., 2017)                                              |            |      |
| 19 |            |                                                                          |            |      |
| 20 | <b>131</b> | Free reverse gracilis muscle combined with steindler flexorplasty for    | Bertelli   | 2018 |
| 21 |            | elbow flexion reconstruction after failed primary repair of extended     |            |      |
| 22 |            | upper-type paralysis of the brachial plexus(Bertelli., 2018)             |            |      |
| 23 | <b>132</b> | Multiple nerve and tendon transfers – a new strategy for restoring       | Xu         | 2017 |
| 24 |            | hand function in a patient with C7-T1 brachial plexus avulsions(Xu et al |            |      |
| 25 |            | ., 2017)                                                                 |            |      |
| 26 |            |                                                                          |            |      |
| 27 |            |                                                                          |            |      |
| 28 |            |                                                                          |            |      |
| 29 |            |                                                                          |            |      |
| 30 |            |                                                                          |            |      |
| 31 |            |                                                                          |            |      |
| 32 |            |                                                                          |            |      |
| 33 |            |                                                                          |            |      |
| 34 |            |                                                                          |            |      |
| 35 |            |                                                                          |            |      |
| 36 |            |                                                                          |            |      |
| 37 |            |                                                                          |            |      |
| 38 |            |                                                                          |            |      |
| 39 |            |                                                                          |            |      |
| 40 |            |                                                                          |            |      |
| 41 |            |                                                                          |            |      |
| 42 |            |                                                                          |            |      |
| 43 |            |                                                                          |            |      |
| 44 |            |                                                                          |            |      |
| 45 |            |                                                                          |            |      |
| 46 |            |                                                                          |            |      |
| 47 |            |                                                                          |            |      |
| 48 |            |                                                                          |            |      |
| 49 |            |                                                                          |            |      |
| 50 |            |                                                                          |            |      |
| 51 |            |                                                                          |            |      |
| 52 |            |                                                                          |            |      |
| 53 |            |                                                                          |            |      |
| 54 |            |                                                                          |            |      |
| 55 |            |                                                                          |            |      |
| 56 |            |                                                                          |            |      |
| 57 |            |                                                                          |            |      |
| 58 |            |                                                                          |            |      |
| 59 |            |                                                                          |            |      |
| 60 |            |                                                                          |            |      |

## Supplementary file 4. Included Studies

## References

- [1] Limthongthang R, Muennoi P, Phoojaroenchanachai R, Vathana T, Wongtrakul S. Effectiveness and safety of home-based muscle electrical stimulator in brachial plexus injury patients. *J Med Assoc Thai*. 2014, 97: S56–61.
- [2] Homsreprasert T, Limthongthang R, Vathana T, Wongtrakul S. Elbow joint proprioceptive sense in total arm-type brachial plexus injured patients after neurotization: a preliminary study. *J Med Assoc Thai*. 2014, 97: S103–7.
- [3] Souza F, Bernardino S, Filho H, Gobbato PL, Martins HAL, Martins RS, et al. Comparison between the anterior and posterior approach for transfer of the spinal accessory nerve to the suprascapular nerve in late traumatic brachial plexus injuries. *Acta Neurochir (Wien)* 2014, 156: 2345–9.
- [4] Kim JH, Shin SH, Lee YR, Lee HS, Chon JY, Sung CH, et al. Ultrasound-guided peripheral nerve stimulation for neuropathic pain after brachial plexus injury: two case reports. *J Anesth*. 2017, 31: 453–7.
- [5] Satbhai NG, Doi K, Hattori Y, Sakamoto S. Contralateral lower trapezius transfer for restoration of shoulder external rotation in traumatic brachial plexus palsy: a preliminary report and literature review. *J Hand Surg Eur*. 2014, 39: 861–7.
- [6] Huan KWSJ, Tan JSW, Tan SH, Teoh LC, Yong FC. Restoration of shoulder abduction in brachial plexus avulsion injuries with double neurotization from the spinal accessory nerve: a report of 13 cases. *J Hand Surg Eur*. 2017, 42: 700–5.
- [7] Bertelli JA, Soldado F, Ghizoni MF, Rodriguez-Baeza A, J.A. B, F. S, et al. Transfer of the musculocutaneous nerve branch to the brachialis muscle to the triceps for elbow extension: anatomical study and report of five cases. *J Hand Surg Eur*. 2017, 42: 710–4.
- [8] Rui J, Zhao X, Zhu Y, Gu Y, Lao J, J. R, et al. Posterior approach for accessory-suprascapular nerve transfer: an electrophysiological outcomes study. *J Hand Surg Eur*, 2013, 38: 242–7.
- [9] Potter SM, Ferris SI. Reliability of functioning free muscle transfer and vascularized ulnar nerve grafting for elbow flexion in complete brachial plexus palsy. *J Hand Surg Eur Vol* 2017, 42: 693–9.
- [10] Lam WL, Fufa D, Chang N-J, Chuang DC-C. Management of infraclavicular (Chuang Level IV) brachial plexus injuries: A single surgeon experience with 75 cases. *J Hand Surg Eur*. 2015, 40: 573–82.
- [11] Estrella EP, Montales TD. Functioning free muscle transfer for the restoration of elbow flexion in brachial plexus injury patients. *Injury*. 2016, 47: 2525–33.
- [12] Desai MJ, Daly CA, Seiler JG 3rd, Wray WH 3rd, Ruch DS, Leversedge FJ, et al. Radial to Axillary Nerve Transfers: A Combined Case Series. *J Hand Surg Am*. 2016, 41: 1128–34.
- [13] Pereira EAC, Boccard SG, Linhares P, Chamadoira C, Rosas MJ, Abreu P, et al. Thalamic deep brain stimulation for neuropathic pain after amputation or brachial plexus avulsion. *Neurosurg Focus*. 2013, 35:E7.
- [14] Estrella EP, Favila AS Jr. Nerve transfers for shoulder function for traumatic brachial plexus injuries. *J Reconstr Microsurg*. 2014, 30: 59-64.



## Supplementary file 4. Included Studies

- 1  
2  
3 [15] Gutkowska O, Martynkiewicz J, Mizia S, Bak M, Gosk J. Results of Operative Treatment of  
4 Brachial Plexus Injury Resulting from Shoulder Dislocation: A Study with A Long-Term Follow-  
5 Up. *World Neurosurg.* 2017,105:623–31.  
6  
7 [16] Oberlin C, Chino J, Belkheyyar Z. Surgical treatment of brachial plexus posterior cord lesion: A  
8 combination of nerve and tendon transfers, about nine patients. *Chir Main.* 2013, 32:141–6.  
9  
10 [17] Ferraresi S, Garozzo D, Basso E, Maistrello L, Lucchin F, Di Pasquale P. The medial cord to  
11 musculocutaneous (MCMc) nerve transfer: A new method to reanimate elbow flexion after  
12 C5-C6-C7-(C8) avulsive injuries of the brachial plexus - Technique and results. *Neurosurg Rev.*  
13 2014, 37:321–9.  
14  
15 [18] Bertelli J, Soldado F, Ghizoni MF, Rodriguez-Baeza A, J. B, F. S, et al. Transfer of a terminal  
16 motor branch nerve to the flexor carpi ulnaris for triceps reinnervation: Anatomical study and  
17 clinical cases. *J Hand Surg Am.* 2015, 40:2229-2235.  
18  
19 [19] Maldonado AA, Kircher MF, Spinner RJ, Bishop AT, Shin AY. Free Functioning Gracilis Muscle  
20 Transfer With and Without Simultaneous Intercostal Nerve Transfer to Musculocutaneous  
21 Nerve for Restoration of Elbow Flexion After Traumatic Adult Brachial Pan-Plexus Injury. *J*  
22 *Hand Surg Am* 2017, 42: 293.  
23  
24 [20] Ghosh S, Singh VK, Jeyaseelan L, Sinisi M, Fox M, S. G, et al. Isolated latissimus dorsi transfer  
25 to restore shoulder external rotation in adults with brachial plexus injury. *Bone Jt J.* 2013, 95:  
26 660–3.  
27  
28 [21] Satbhai NG, Doi K, Hattori Y, Sakamoto S, N.G. S, K. D, et al. Functional outcome and quality of  
29 life after traumatic total brachial plexus injury treated by nerve transfer or single/double free  
30 muscle transfers: A comparative study. *Bone Jt J.* 2016, 98: 209–17.  
31  
32 [22] Mibu A, Nishigami T, Tanaka K, Osumi M, Tanabe A. Successful Graded Mirror Therapy in a  
33 Patient with Chronic Deafferentation Pain in Whom Traditional Mirror Therapy was  
34 Ineffective: A Case Report. *Pain Pract.* 2016, 16: E62–9.  
35  
36 [23] Azab AA-H, Alsabbahi MS, A.A.-H. A, Azab AA-H, Alsabbahi MS. Bipolar Transfer of Latissimus  
37 Dorsi Myocutaneous Flap for Restoration of Elbow Flexion in Late Traumatic Brachial Plexus  
38 Injury: Evaluation of 13 Cases. *Ann Plast Surg.* 2017, 78: 198–201.  
39  
40 [24] Tsai Y-J, Su F-C, Hsiao C-K, Tu Y-K. Comparison of objective muscle strength in C5-C6 and C5-  
41 C7 brachial plexus injury patients after double nerve transfer. *Microsurgery.* 2015, 35: 107–  
42 14.  
43  
44 [25] Son BC, Ha SW. Phantom Remodeling Effect of Dorsal Root Entry Zone Lesioning in Phantom  
45 Limb Pain Caused by Brachial Plexus Avulsion. *Stereotact Funct Neurosurg* 2015, 93: 240–4.  
46  
47 [26] Hu CH, Chang TN, Lu JC, Laurence VG, Chuang DC. Comparison of Surgical Strategies between  
48 Proximal Nerve Graft and/or Nerve Transfer and Distal Nerve Transfer Based on Functional  
49 Restoration of Elbow Flexion: A Retrospective Review of 147 Patients. *Plast Reconstr Surg.*  
50 2018, 141: 68e-79e.  
51  
52 [27] Ren G, Li R, Xiang D, Yu B. Reconstruction of shoulder abduction by multiple nerve fascicle  
53 transfer through posterior approach. *Injury.* 2013, 44: 492–7.  
54  
55 [28] Xiao C, Lao J, Wang T, Zhao X, Liu J, Gu Y. Intercostal nerve transfer to neurotize the  
56 musculocutaneous nerve after traumatic brachial plexus avulsion: a comparison of two,  
57 three, and four nerve transfers. *J Reconstr Microsurg* 2014, 30: 297–304.  
58  
59 [29] Resnik L, Fantini C, Latlief G, Phillips S, Sasson N, Sepulveda E, et al. Use of the DEKA Arm for  
60

## Supplementary file 4. Included Studies

- 1  
2  
3 amputees with brachial plexus injury: A case series. *PLoS One*. 2017, 12: e0178642.
- 4  
5 [30] Leechavengvongs S, Jiamton C, Uerpairojkit C, Malungpaishorpe K, Witoonchart K, Poonotoke  
6 P, et al. Polyester tape scapulopexy for chronic upper extremity brachial plexus injury. *J Hand  
7 Surg Am*. 2015, 40:1184
- 8  
9 [31] Wang S, Li P, Xue Y, Yiu H, Li YC, Wang H. Contralateral C7 nerve transfer with direct  
10 coaptation to restore lower trunk function after traumatic brachial plexus avulsion. *J Bone  
11 Joint Surg Am*. 2013, 95: 821–2.
- 12  
13 [32] Dodakundi C, Doi K, Hattori Y, Sakamoto S, Fujihara Y, Takagi T, et al. Outcome of surgical  
14 reconstruction after traumatic total brachial plexus palsy. *J Bone Joint Surg Am*. 2013,  
15 95:1505–12.
- 16  
17 [33] Aszmann OC, Roche AD, Salminger S, Paternostro-Sluga T, Herceg M, Sturma A, et al. Bionic  
18 reconstruction to restore hand function after brachial plexus injury: a case series of three  
19 patients. *Lancet*. 2015, 385: 2183–9.
- 20  
21 [34] Tsymbaliuk VI, Tretiak IB. [Surgical treatment of the plexus brachialis injury using long-lasting  
22 electrostimulation]. *Klin Khirurgiia*. 2013, 59–61.
- 23  
24 [35] Flores LP, Socolovsky M. Phrenic Nerve Transfer for Reconstruction of Elbow Extension in  
25 Severe Brachial Plexus Injuries. *J Reconstr Microsurg*. 2016, 32: 546–50.
- 26  
27 [36] Wang S, Li P, Xue Y, Zou J, Li W, Li Y. Direct Coaptation of the Phrenic Nerve With the  
28 Posterior Division of the Lower Trunk to Restore Finger and Elbow Extension Function in  
29 Patients With Total Brachial Plexus Injuries. *Neurosurgery*. 2016, 78: 208–14.
- 30  
31 [37] Martins RS, Siqueira MG, Heise CO, Foroni L, Teixeira MJ. A prospective study comparing  
32 single and double fascicular transfer to restore elbow flexion after brachial plexus injury.  
33 *Neurosurgery*. 2013, 72: 709–15.
- 34  
35 [38] Stevanato G, Devigili G, Eleopra R, Fontana P, Lettieri C, Baracco C, et al. Chronic post-  
36 traumatic neuropathic pain of brachial plexus and upper limb: a new technique of peripheral  
37 nerve stimulation. *Neurosurg Rev*. 2014, 37: 473–9.
- 38  
39 [39] Wei W, Alimujiang-Abulaiti, Tuerxunjiang-Dadihan, Meihua S, Yafei L, Chunxiao Y, et al.  
40 [EFFECTIVENESS OF CONTRALATERAL C7 NERVE ROOT AND MULTIPLE NERVES TRANSFER FOR  
41 TREATMENT OF BRACHIAL PLEXUS ROOT AVULSION]. *Zhongguo Xiu Fu Chong Jian Wai Ke Za  
42 Zhi*. 2014, 28: 737–40.
- 43  
44 [40] Plate JF, Ely LK, Pulley BR, Smith BP, Li Z. Combined proximal nerve graft and distal nerve  
45 transfer for a posterior cord brachial plexus injury. *J Neurosurg*. 2013, 118: 155–9.
- 46  
47 [41] Maldonado AA, Kircher MF, Spinner RJ, Bishop AT, Shin AY. The role of elective amputation in  
48 patients with traumatic brachial plexus injury. *J Plast Reconstr Aesthetic Surg*. 2016, 69:311–  
49 7.
- 50  
51 [42] Liu Y, Wang W, Regmi AM, Ahemaitijiang-Yusufu. Early microsurgical management of  
52 clavicular fracture combined with brachial plexus injury. *Zhongguo Xiu Fu Chong Jian Wai Ke  
53 Za Zhi*. 2014a,28: 1329–32.
- 54  
55 [43] Elhassan BT, Wagner ER, Spinner RJ, Bishop AT, Shin AY. Contralateral Trapezius Transfer to  
56 Restore Shoulder External Rotation Following Adult Brachial Plexus Injury. *J Hand Surg Am*.  
57 2016, 41: e45-51.
- 58  
59 [44] Liu Y, Lao J, Gao K, Gu Y, Zhao X. Comparative study of phrenic nerve transfers with and  
60

## Supplementary file 4. Included Studies

- without nerve graft for elbow flexion after global brachial plexus injury. *Injury*. 2014b, 45: 227–31.
- [45] Wang J-P, Rancy SK, Lee SK, Feinberg JH, Wolfe SW. Shoulder and Elbow Recovery at 2 and 11 Years Following Brachial Plexus Reconstruction. *J Hand Surg Am*. 2016, 41:173–9.
- [46] Aras Y, Aydoseli A, Sabanci PA, Akcakaya MO, Alkir G, Imer M. Functional outcomes after treatment of traumatic brachial plexus injuries: clinical study. *Ulus Travma Acil Cerrahi Derg*. 2013, 19: 521–8.
- [47] Soldado F, Bertelli J, F. S. Free gracilis transfer reinnervated by the nerve to the supinator for the reconstruction of finger and thumb extension in longstanding C7-T1 brachial plexus root avulsion. *J Hand Surg Am*. 2013, 38: 941–6.
- [48] Zhang C-G, Dong Z, Gu Y-D. Restoration of hand function in C7-T1 brachial plexus palsies using a staged approach with nerve and tendon transfer. *J Neurosurg*. 2014, 121: 1264–70.
- [49] Dy CJ, Kitay A, Garg R, Kang L, Feinberg JH, Wolfe SW, et al. Neurotization to innervate the deltoid and biceps: 3 Cases. *J Hand Surg Am*. 2013, 38:237–40.
- [50] Lenoir H, Williams T, Griffart A, Lazerges C, Chammas M, Coulet B, et al. Arthroscopic arthrodesis of the shoulder in brachial plexus palsy. *J Shoulder Elb Surg*. 2017, 26: e115–21.
- [51] Gao K, Lao J, Zhao X, Gu Y. Outcome of contralateral C7 nerve transferring to median nerve. *Chin Med J (Engl)*. 2013, 126: 3865–8.
- [52] Cho AB, Iamaguchi RB, Silva GB, Paulos RG, Kiyohara LY, Sorrenti L, et al. Intercostal nerve transfer to the biceps motor branch in complete traumatic brachial plexus injuries. *Microsurgery*. 2015, 35: 428–31.
- [53] Sano Y, Wake N, Ichinose A, Osumi M, Oya R, Sumitani M, et al. Tactile feedback for relief of deafferentation pain using virtual reality system: a pilot study. *J Neuroeng Rehabil*. 2016, 13:61.
- [54] Yang Y, Yang J-T, Fu G, Li X-M, Qin B-G, Hou Y, et al. Functioning free gracilis transfer to reconstruct elbow flexion and quality of life in global brachial plexus injured patients. *Sci Rep*. 2016, 6: 22479.
- [55] Baltzer HL, Wagner ER, Kircher MF, Spinner RJ, Bishop AT, Shin AY, et al. Evaluation of infraspinatus reinnervation and function following spinal accessory nerve to suprascapular nerve transfer in adult traumatic brachial plexus injuries. *Microsurgery*. 2017, 37: 365–70.
- [56] Hu S, Chu B, Song J, Chen L. Anatomic study of the intercostal nerve transfer to the suprascapular nerve and a case report. *J Hand Surg Eur*. 2014, 39: 194–8.
- [57] Kostas-Agnantis I, Korompilias A, Vekris M, Lykissas M, Gkiatas I, Mitsionis G, et al. Shoulder abduction and external rotation restoration with nerve transfer. *Injury*. 2013, 44: 299–304.
- [58] Bhatia A, Doshi P, Koul A, Shah V, Brown JM, Salama M, et al. Contralateral C-7 transfer: is direct repair really superior to grafting? *Neurosurg Focus*. 2017, 43: E3.
- [59] Kita Y, Tajiri Y, Hoshikawa S, Hara Y, Iijima J. Impact of phrenic nerve paralysis on the surgical outcome of intercostal nerve transfer. *Hand Surg*. 2015, 20: 47–52.
- [60] Hou Y, Yang J, Yang Y, Qin B, Fu G, Li X, et al. Flow-through anastomosis using a T-shaped vascular pedicle for gracilis functioning free muscle transplantation in brachial plexus injury. *Clinics (Sao Paulo)*. 2015, 70: 544–9.

## Supplementary file 4. Included Studies

- 1  
2  
3 [61] Sechachalam S, O'Byrne A, MacQuillan A. Free Functional Muscle Transfer Tendon Insertion  
4 Secondary Advancement Procedure to Improve Elbow Flexion. *Tech Hand Up Extrem Surg.*  
5 2017, 21: 8–12.  
6  
7 [62] Chu B, Wang H, Chen L, Gu Y, Hu S. Dual Nerve Transfers for Restoration of Shoulder Function  
8 After Brachial Plexus Avulsion Injury. *Ann Plast Surg.* 2016, 76: 668–73.  
9  
10 [63] Bhat DI, Indira Devi B, Bharti K, Panda R. Cortical plasticity after brachial plexus injury and  
11 repair: a resting-state functional MRI study. *Neurosurg Focus.* 2017, 42: E14.  
12  
13 [64] Bertelli JA, Ghizoni MF, J.A. B. Results of spinal accessory to suprascapular nerve transfer in  
14 110 patients with complete palsy of the brachial plexus. *J Neurosurg Spine.* 2016, 24: 990–5.  
15  
16 [65] Frueh FS, Ho M, Schiller A, Ducommun P, Manoliu A, Andreisek G, et al. Magnetic Resonance  
17 Neurographic and Clinical Long-Term Results After Oberlin's Transfer for Adult Brachial Plexus  
18 Injuries. *Ann Plast Surg.* 2017, 78: 67–72.  
19  
20 [66] Maldonado AA, Kircher MF, Spinner RJ, Bishop AT, Shin AY. Free Functioning Gracilis Muscle  
21 Transfer versus Intercostal Nerve Transfer to Musculocutaneous Nerve for Restoration of  
22 Elbow Flexion after Traumatic Adult Brachial Pan-Plexus Injury. *Plast Reconstr Surg.* 2016,  
23 138: 483e-488e.  
24  
25 [67] Bertelli JA, Ghizoni MF, Tacca CP. Results of wrist extension reconstruction in C5-8 brachial  
26 plexus palsy by transferring the pronator quadratus motor branch to the extensor carpi  
27 radialis brevis muscle. *J Neurosurg.* 2016, 124: 1442–9.  
28  
29 [68] Nicoson MC, Franco MJ, Tung TH. Donor nerve sources in free functional gracilis muscle  
30 transfer for elbow flexion in adult brachial plexus injury. *Microsurgery.* 2017, 37: 377–82.  
31  
32 [69] Bhandari PS, Deb P. Use of contralateral spinal accessory nerve for ipsilateral suprascapular  
33 neurotization in global brachial plexus injury: A new technique. *J Neurosurg Spine.* 2016, 24:  
34 186–8.  
35  
36 [70] Maricq C, Jeunehomme M, Mouraux D, Remy P, Brassinne E, Bahm J, et al. Objective  
37 evaluation of elbow flexion strength and fatigability after nerve transfer in adult traumatic  
38 upper brachial plexus injuries. *Hand Surg.* 2014, 19: 335–41.  
39  
40 [71] DeGeorge B, Becker H, Faryna J, Spinner R, Bishop A. Outcomes of brachialis muscle transfer  
41 to restore finger flexion in traumatic lower trunk brachial plexus palsy. *J Hand Surg Am.* 2017,  
42 42: S33–4.  
43  
44 [72] Liu Y, Lao J, Gao K, Gu Y, Zhao X. Functional outcome of nerve transfers for traumatic global  
45 brachial plexus avulsion. *Injury.* 2013, 44:655–60.  
46  
47 [73] Bertelli JA, Ghizoni MF. Transfer of a flexor digitorum superficialis motor branch for wrist  
48 extension reconstruction in C5-C8 root injuries of the brachial plexus: a case series.  
49 *Microsurgery.* 2013, 33:39–42.  
50  
51 [74] Gao K, Lao J, Zhao X, Gu Y. Outcome after transfer of intercostal nerves to the nerve of triceps  
52 long head in 25 adult patients with total brachial plexus root avulsion injury. *J Neurosurg*  
53 2013, 118: 606–10.  
54  
55 [75] Foroni L, Siqueira MG, Martins RS, Heise CO, Sterman HN, Imamura AY. Good sensory  
56 recovery of the hand in brachial plexus surgery using the intercostobrachial nerve as the  
57 donor. *Arq Neuropsiquiatr.* 2017, 75: 796–800.  
58  
59 [76] Socolovsky M, di Masi G, Bonilla G, Dominguez Paez M, Robla J, Calvache Cabrera C, et al. The  
60

## Supplementary file 4. Included Studies

- phrenic nerve as a donor for brachial plexus injuries: is it safe and effective? Case series and literature analysis. *Acta Neurochir (Wien)*. 2015, 157: 1077–86.
- [77] Hattori Y, Doi K, Sakamoto S, Satbhai NG. Complete avulsion of brachial plexus with associated vascular trauma: feasibility of reconstruction using the double free muscle technique. *Plast Reconstr Surg*. 2013, 132: 1504–12.
- [78] Kachramanoglou C, Carlstedt T, Koltzenburg M, Choi D, C. K, T. C, et al. Long-Term Outcome of Brachial Plexus Reimplantation After Complete Brachial Plexus Avulsion Injury. *World Neurosurg*. 2017, 103: 28–36.
- [79] Kodama N, Doi K, Hattori Y. Force recovery assessment of functioning free muscle transfers using ultrasonography. *J Hand Surg Am*. 2014, 39: 2269–76.
- [80] Goubier J, Teboul F. Rhomboid nerve transfer to the suprascapular nerve for shoulder reanimation in brachial plexus palsy: A clinical report. *Hand Surg Rehabil*. 2016, 35: 363–6.
- [81] Gao K, Lao J, Zhao X, Gu Y. Outcome of contralateral C7 transfer to two recipient nerves in 22 patients with the total brachial plexus avulsion injury. *Microsurgery*. 2013, 33: 605–11.
- [82] Liu Y, Lao J, Zhao X. Comparative study of phrenic and intercostal nerve transfers for elbow flexion after global brachial plexus injury. *Injury*. 2015, 46: 671–5.
- [83] Li XM, Yang JT, Hou Y, Yang Y, Qin BG, Fu G, et al. Donor-side morbidity after contralateral C-7 nerve transfer: results at a minimum of 6 months after surgery. *J Neurosurg*. 2016, 124: 1434–41.
- [84] Rasulic L, Savic A, Zivkovic B, Vitosevic F, Micovic M, Bascarevic V, et al. Outcome after brachial plexus injury surgery and impact on quality of life. *Acta Neurochir (Wien)* 2017, 159: 1257–64.
- [85] Yang J, Jia X, Yu C, Gu Y. Pronator teres branch transfer to the anterior interosseous nerve for treating C8T1 brachial plexus avulsion: An anatomic study and case report. *Neurosurgery*. 2014, 75: 375–9.
- [86] Stiasny J, Birkeland P, J. S. Operative treatment with nerve repair can restore function in patients with traction injuries in the brachial plexus. *Dan Med J*. 2015, 62.
- [87] Soldado F, Ghizoni MF, Bertelli J, F. S, M.F. G. Thoracodorsal nerve transfer for triceps reinnervation in partial brachial plexus injuries. *Microsurgery*. 2016, 36: 191–7.
- [88] Thakkar UG, Vanikar A V, Trivedi HL. Co-infusion of autologous adipose tissue derived neuronal differentiated mesenchymal stem cells and bone marrow derived hematopoietic stem cells, a viable therapy for post-traumatic brachial plexus injury: a case report. *Biomed J*. 2014, 37: 237–40.
- [89] Emamhadi M, Alijani B, Andalib S, M. E, B. A. Long-term clinical outcomes of spinal accessory nerve transfer to the suprascapular nerve in patients with brachial plexus palsy. *Acta Neurochir (Wien)*. 2016, 158: 1801–6.
- [90] Tu YK, Tsai YJ, Chang CH, Su FC, Hsiao CK, Tan JS. Surgical treatment for total root avulsion type brachial plexus injuries by neurotization: a prospective comparison study between total and hemicontralateral C7 nerve root transfer. *Microsurgery*. 2014, 34: 91–101.
- [91] Qiu YQ, Hua XY, Zuo CT, Li T, Zheng MX, Shen YD, et al. Deactivation of distant pain-related regions induced by 20-day rTMS: a case study of one-week pain relief for long-term intractable deafferentation pain. *Pain Physician*. 2014, 17: E99–105.

## Supplementary file 4. Included Studies

- 1  
2  
3 [92] Haninec P, Mencl L, Kaiser R. End-to-side neurorrhaphy in brachial plexus reconstruction. *J Neurosurg.* 2013, 119: 689–94.  
4  
5  
6 [93] Flores LP. Reanimation of elbow extension with medial pectoral nerve transfer in partial  
7 injuries to the brachial plexus. *J Neurosurg.* 2013, 118: 588–93.  
8  
9 [94] Mohammad-Reda A. Early post-operative results after repair of traumatic brachial plexus  
10 palsy. *Turk Neurosurg.* 2013, 23: 1–9.  
11  
12 [95] van der Lingen MAJ, de Joode SGJ, Schotanus MGM, Grimm B, van Nie FA, Speth LAWM, et  
13 al. Satisfied patients after shoulder arthrodesis for brachial plexus lesions even after 20 years  
14 of follow-up. *Eur J Orthop Surg Traumatol.* 2018, 28: 1089–94  
15  
16 [96] Klika BJ, Spinner RJ, Bishop AT, Kircher MF, Shin AY. Posterior branch of the axillary nerve  
17 transfer to the lateral triceps branch for restoration of elbow extension: case report. *J Hand  
18 Surg Am.* 2013, 38: 1145–9.  
19  
20 [97] Liu J, Wang X, Zhang S, Wang L, Xia D, Gao Q, et al. A clinical analysis of repairing the whole  
21 brachial plexus nerve root avulsion by transferring C7 nerve root from the uninjured side. *J  
22 Neurol Sci.* 2014, 31: 521–31.  
23  
24 [98] Cambon-Binder A, Walch A, Marchei P, Belkheyar Z. Bipolar transfer of the pectoralis major  
25 muscle for restoration of elbow flexion in 29 cases. *J Shoulder Elb Surg.* 2018, 27: e330-e336  
26  
27 [99] Soldado F, Ghizoni MF, Bertelli J. Thoracodorsal nerve transfer for elbow flexion  
28 reconstruction in infraclavicular brachial plexus injuries. *J Hand Surg Am.* 2014, 39: 1766–70.  
29  
30 [100] Cho A, Paulos R, De Resende M, Kiyohara L, Sorrenti L, Wei TH, et al. Median nerve fascicle  
31 transfer versus ulnar nerve fascicle transfer to the biceps motor branch in C5-C6 and C5-C7  
32 brachial plexus injuries: Nonrandomized prospective study of 23 consecutive patients.  
33 *Microsurgery.* 2014, 34: 511–5.  
34  
35 [101] Kaizawa Y, Kakinoki R, Ohta S, Noguchi T. Free functional muscle transplantation of an  
36 anomalous femoral adductor with a very large muscle belly: A case report. *J Brachial Plex  
37 Peripher Nerve Inj.* 2013, 8: 11.  
38  
39 [102] Tuohuti T, Yu Q, Yang J, Wang T. Selective neurotization of the radial nerve in the axilla using  
40 intercostal nerve to treat complete brachial plexus palsy. *Int J Clin Exp Med.* 2016, 9: 22880–  
41 5.  
42  
43 [103] Flores LP. Objective Predictors of Functional Recovery Associated with Intercostal Nerves  
44 Transfer for Triceps Reinnervation in Global Brachial Plexus Palsy. *Brazilian Neurosurg* 2016,  
45 35: 271–8.  
46  
47 [104] Emamhadi M. Nerve transfer to relieve pain in upper brachial plexus injuries: Does it work?  
48 *Clin Neurol Neurosurg.* 2017,163: 67–70.  
49  
50 [105] Abdixbir A, Li P, Ilhamjan U, Exmetjan Y. Phrenic nerve transfer versus intercostal nerve  
51 transfer for the repair of brachial plexus root avulsion injuries. *Chinese J Tissue Eng Res.* 2016,  
52 20: 7660–5.  
53  
54 [106] Limthongthang R, Vathana T, Wongtrakul S, Songcharoen P. End-to-Side Neurorrhaphy to  
55 Restore Elbow Flexion in Brachial Plexus Injury. *J Med Assoc Thai.* 2016, 99: 1203–8.  
56  
57 [107] De Oliveira C, Da Silva Melo D, Mestriner R, De Menezes M, Da Silva Filho I, Da Silva J.  
58 Chordata method combined with electrotherapy in functional recovery after brachial plexus  
59 injury: Report of three clinical cases. *Sci Med (Porto Alegre).* 2016, 26: 22425.  
60

## Supplementary file 4. Included Studies

- 1  
2  
3 [108] Xu B, Dong Z, Zhang C-G, Gu Y-D. Clinical outcome following transfer of the supinator motor  
4 branch to the posterior interosseous nerve in patients with C7-T1 brachial plexus palsy. *J*  
5 *Reconstr Microsurg*. 2015, 31: 102–6.  
6  
7 [109] Wu X, Cong XB, Huang QS, Ai FX, Liu YT, Lu XC, et al. Transposition of branches of radial nerve  
8 innervating supinator to posterior interosseous nerve for functional reconstruction of finger  
9 and thumb extension in 4 patients with middle and lower trunk root avulsion injuries of  
10 brachial plexus. *J Huazhong Univ Sci Technolog Med Sci*. 2017, 37: 933–7.  
11  
12 [110] Kazamel M, Sorenson EJ. Electromyographic Findings in Gracilis Muscle Grafts Used to  
13 Augment Elbow Flexion in Traumatic Brachial Plexopathy. *J Clin Neurophysiol*. 2016. 33:549–  
14 53.  
15  
16 [111] Li Z, Reynolds M, Satteson E, Nazir O, Petit J, Smith BP. Double Distal Intraneural Fascicular  
17 Nerve Transfers for Lower Brachial Plexus Injuries. *J Hand Surg Am*. 2016, 41: e15-9.  
18  
19 [112] Arnal M, Cambon A, Marcheix P. Restoration of elbow and hand function in total brachial  
20 plexus palsy with intercostal nerves and C5 root neurotization. Results in 21 patients. *Hand*  
21 *Surg Rehabil*. 2016, 35: 283–7.  
22  
23 [113] Jiang Y, Lao J. The phrenic nerve transfer in the treatment of a septuagenarian with brachial  
24 plexus avulsion injury: a case report. *Int J Neurosci*. 2018, 128: 467–71.  
25  
26 [114] Flores LP. Outcomes of Transferring a Healthy Motor Fascicle From the Radial Nerve to a  
27 Branch for the Triceps to Recover Elbow Extension in Partial Brachial Plexus Palsy.  
28 *Neurosurgery*. 2017, 80: 448–53.  
29  
30 [115] Johnsen PH, Wolfe SW. Successful Nerve Transfers for Traumatic Brachial Plexus Palsy in a  
31 Septuagenarian: A Case Report. *Hand (N Y)*. 2016, 11: NP30–3.  
32  
33 [116] Maldonado AA, Romero-Brufau S, Kircher MF, Spinner RJ, Bishop AT, Shin AY. Free  
34 Functioning Gracilis Muscle Transfer for Elbow Flexion Reconstruction after Traumatic Adult  
35 Brachial Pan-Plexus Injury: Where Is the Optimal Distal Tendon Attachment for Elbow  
36 Flexion?. *Plast Reconstr Surg*. 2017, 139: 128–36.  
37  
38 [117] Bhandari PS. Results of Distal Nerve Transfers in Restoration of Shoulder Function in C5 and  
39 C6 Root Avulsion Injury to the Brachial Plexus. *Indian J Neurotrauma* 2017, 14: 21–5.  
40  
41 [118] Watanabe M, Yamamoto T, Fukaya C, Obuchi T, Kano T, Kobayashi K, et al. Bipolar dual-lead  
42 spinal cord stimulation between two electrodes on the ventral and dorsal sides of the spinal  
43 cord: consideration of putative mechanisms. *Acta Neurochir (Wien)*. 2018, 160: 639–43.  
44  
45 [119] Al-Qattan M, Kattan A, Al-Qahtany B, Al-Qattan O. Triceps nerve to deltoid nerve transfer  
46 after an unsatisfactory intra-plexus neurotization of the posterior division of the upper trunk.  
47 *Int J Surg Case Rep*. 2017, 37: 124–6.  
48  
49 [120] Alrabai H, Gesheff G, Hammouda A, Conway J. Trapezius Muscle Transfer for Restoration of  
50 Elbow Extension in a Traumatic Brachial Plexus Injury. *J Hand Surg Am*. 2018, 43: 872.  
51  
52 [121] Bertelli JA. Transfer of the radial nerve branch to the extensor carpi radialis brevis to the  
53 anterior interosseous nerve to reconstruct thumb and finger flexion. *J Hand Surg Am*. 2015,  
54 40: 323-328.  
55  
56 [122] Magistrini E, Ciclamini D, Panero B. Ultrasound-guided pulse-dose radiofrequency:  
57 Treatment of neuropathic pain after brachial plexus lesion and arm revascularization. *Case*  
58 *Rep Med*. 2014, 201:429618.  
59  
60

## Supplementary file 4. Included Studies

- 1  
2  
3 [123] Liu Y, Xu X, Zou Y, Li S, Zhang B. Phrenic nerve transfer to the musculocutaneous nerve for the  
4 repair of brachial plexus injury: Electrophysiological characteristics. *Neural Regen Res.* 2015,  
5 10: 328–33.  
6  
7 [124] Le Hanneur M, Walch A, Gerosa T, Grandjean A, Masmajeun E. Postoperative motor deficits  
8 following elbow flexion reanimation by nerve transfer. *Hand Surg Rehabil* 2018, 37: 289-294  
9  
10 [125] Liu Y, Zhuang Y, Yu H, Xiong H. Comparative study of phrenic and partial ulnar nerve transfers  
11 for elbow flexion after upper brachial plexus avulsion: A retrospective clinical analysis. *J Plast*  
12 *Reconstr Aesthetic Surg.* 2018, 71: 1245–51.  
13  
14 [126] Yavari M, Mahmoudvand H, Nadri S. Contralateral medial pectoral nerve transfer with free  
15 gracilis muscle transfer in old brachial plexus palsy. *J Surg Res.* 2018, 231: 94–8.  
16  
17 [127] Yanagisawa T, Fukuma R, Seymour B, Hosomi K, Kishima H, Shimizu T, et al. MEG-BMI to  
18 control phantom limb pain. *Neurol Med Chir (Tokyo).* 2018, 58: 327–33.  
19  
20 [128] Choong C, Shalimar A. Complete brachial plexus injury - An amputation dilemma. A case  
21 report. *Malaysian Orthop J.* 2015, 9: 52–4.  
22  
23 [129] Tsao J, Finn S. Reversal of phantom pain and hand-to-face remapping after brachial plexus  
24 avulsion. *Ann Clin Transl Neurol.* 2016, 3: 463–4.  
25  
26 [130] Kubota S, Hara Y, Shimizu Y, Kadone H, Kubo T, Marushima A, et al. A newly developed upper  
27 limb single-joint HAL in a patient with elbow flexion reconstruction after traumatic brachial  
28 plexus injury: A case report. *Interdiscip Neurosurg Adv Tech Case Manag.* 2017, 10: 66–8.  
29  
30 [131] Bertelli JA. Free Reverse Gracilis Muscle Combined With Steindler Flexorplasty for Elbow  
31 Flexion Reconstruction After Failed Primary Repair of Extended Upper-Type Paralysis of the  
32 Brachial Plexus. *J Hand Surg Am.* 2019, 44: 112-120  
33  
34 [132] Xu B, Dong Z, Zhang C. Multiple nerve and tendon transfers: A new strategy for restoring  
35 hand function in a patient with C7-T1 brachial plexus avulsions. *J Neurosurg.* 2017, 127: 837–  
36 42.  
37  
38  
39  
40  
41  
42  
43  
44  
45  
46  
47  
48  
49  
50  
51  
52  
53  
54  
55  
56  
57  
58  
59  
60



**Supplementary file 5: Unique outcomes mapped to potential domains and core areas according to COMET**

**Online Supplementary file 5. Table: Unique outcomes mapped to potential domains and core areas according to COMET(Dodd et al., 2018)**

| Outcomes ( n=157)                  | Subdomains                    | Domains                                      | Core Areas             |
|------------------------------------|-------------------------------|----------------------------------------------|------------------------|
| Isometric muscle strength          | Muscle strength/function      | Musculoskeletal and connective tissue domain | Physiological/Clinical |
| Concentric strength                |                               |                                              |                        |
| Eccentric strength                 |                               |                                              |                        |
| Muscle flicker/contraction         |                               |                                              |                        |
| Anti-gravity muscle activity       |                               |                                              |                        |
| Muscle endurance                   |                               |                                              |                        |
| Muscle fatigue                     |                               |                                              |                        |
| Muscle torque                      |                               |                                              |                        |
| Active range of movement           | Active movement               |                                              |                        |
| Perception of movement             |                               |                                              |                        |
| Antigravity movement               |                               |                                              |                        |
| Independent movement without donor |                               |                                              |                        |
| Passive range of movement          | Passive movement              |                                              |                        |
| Movement control/stability         | Control of movement/stability |                                              |                        |
| Muscle mass                        | Muscle mass                   |                                              |                        |
| Bony union                         | Bone structure/position       |                                              |                        |
| Joint position                     |                               |                                              |                        |
| Joint stability                    |                               |                                              |                        |
| General sensory recovery           | General sensory recovery      | Nervous system                               |                        |
| Feeling of numbness                |                               |                                              |                        |
| Proprioception                     |                               |                                              |                        |
| Light touch                        | Discriminative touch          |                                              |                        |
| 2 PD                               |                               |                                              |                        |

1

**Supplementary file 5: Unique outcomes mapped to potential domains and core areas according to COMET**

|                                                 |                                         |                           |  |
|-------------------------------------------------|-----------------------------------------|---------------------------|--|
| Vibration                                       |                                         |                           |  |
| Object recognition                              |                                         |                           |  |
| Pain                                            | Protective touch                        |                           |  |
| Temperature                                     |                                         |                           |  |
| Deep pressure                                   |                                         |                           |  |
| Brachial plexus structure                       | Peripheral nervous system structure     |                           |  |
| Level of reinnervation                          | Reinnervation                           |                           |  |
| Time to reinnervation                           |                                         |                           |  |
| Progression of regeneration                     | Progression of regeneration             |                           |  |
| Speed of motor sensory conduction               | Speed of motor and sensory conduction   |                           |  |
| Pain intensity                                  | Pain intensity/relief                   | General outcomes/symptoms |  |
| Pain relief / reduction                         |                                         |                           |  |
| Pain duration                                   | Pain duration/frequency                 |                           |  |
| Pain frequency                                  |                                         |                           |  |
| Pain quality                                    | Pain quality and interference with life |                           |  |
| Pain interference with walking                  |                                         |                           |  |
| Pain interference in mood                       |                                         |                           |  |
| Pain interference with work                     |                                         |                           |  |
| Pain interference in activities of daily living |                                         |                           |  |
| Pain interference with relationships            |                                         |                           |  |
| Pain interference with enjoyment of life        |                                         |                           |  |
| Pain interference with sleep                    |                                         |                           |  |
| Sensitivity to cold                             | Pain when arm exposed to cold           |                           |  |
| Paraesthesia                                    | Paraesthesia and itchiness              |                           |  |
| Itchiness                                       |                                         |                           |  |

**Supplementary file 5: Unique outcomes mapped to potential domains and core areas according to COMET**

|                                      |                                                       |                  |  |                      |             |
|--------------------------------------|-------------------------------------------------------|------------------|--|----------------------|-------------|
| Sensitivity to pressure              | Sensitivity to touch, pressure etc                    |                  |  |                      |             |
| Sensitivity to touch                 |                                                       |                  |  |                      |             |
| Pain location                        | Location of pain                                      |                  |  |                      |             |
| Pain relief from medication          | Pain medication use                                   |                  |  |                      |             |
| Stiffness                            | Stiffness                                             |                  |  |                      |             |
| Impact on general sleep              | Impact on sleep                                       |                  |  |                      |             |
| Impact on sleep on affected side     |                                                       |                  |  |                      |             |
| Frequency sleep disturbed by injury  |                                                       |                  |  |                      |             |
| General physical function            | Physical function non-specific                        |                  |  | Physical functioning | Life Impact |
| Patient led functional outcome       |                                                       |                  |  |                      |             |
| Walking short distance               | Lower limb and non -upper limb function               |                  |  |                      |             |
| Balance                              |                                                       |                  |  |                      |             |
| Running                              |                                                       |                  |  |                      |             |
| Climbing stairs                      |                                                       |                  |  |                      |             |
| Bending                              |                                                       |                  |  |                      |             |
| Kneeling                             |                                                       |                  |  |                      |             |
| Reaching                             | Reaching, pulling, pushing, carrying etc              |                  |  |                      |             |
| Pulling                              |                                                       |                  |  |                      |             |
| Pushing                              |                                                       |                  |  |                      |             |
| Carrying                             |                                                       |                  |  |                      |             |
| Throwing                             |                                                       |                  |  |                      |             |
| Lifting                              |                                                       |                  |  |                      |             |
| General function of arm              | Turning twisting, gripping and releasing with the arm |                  |  |                      |             |
| Turning and twisting arm             |                                                       |                  |  |                      |             |
| Grip and release                     |                                                       |                  |  |                      |             |
| Pinching                             |                                                       |                  |  |                      |             |
| Fine hand movement (writing/buttons) | Fine hand movement including writing                  |                  |  |                      |             |
| Returning to work                    | Impact on paid or unpaid work or role in education    | Role functioning |  |                      |             |
| Ability to do work                   |                                                       |                  |  |                      |             |
| Usual time at work                   |                                                       |                  |  |                      |             |
| Type of work                         |                                                       |                  |  |                      |             |

**Supplementary file 5: Unique outcomes mapped to potential domains and core areas according to COMET**

|                                                            |                                                                                     |                              |  |
|------------------------------------------------------------|-------------------------------------------------------------------------------------|------------------------------|--|
| Usual school activities                                    |                                                                                     |                              |  |
| General rating to perform a patient specific activity      | Role function - patient specific                                                    |                              |  |
| Impact on ADL (general)                                    | Carrying out daily routine, (including food preparation, housework, garden, plants) |                              |  |
| Return to ADL (general)                                    |                                                                                     |                              |  |
| Impact on food preparation and feeding                     |                                                                                     |                              |  |
| Housework (washing, cleaning, ironing, folding, vacuuming) |                                                                                     |                              |  |
| Gardening (Includes indoor plants)                         |                                                                                     |                              |  |
| Using a phone                                              |                                                                                     |                              |  |
| Maintaining personal hygiene                               |                                                                                     |                              |  |
| Maintaining personal appearance (grooming hair)            |                                                                                     | Maintaining personal hygiene |  |
| Dressing                                                   | Maintaining personal appearance                                                     |                              |  |
| Transport needs (e.g driving)                              | Dressing                                                                            |                              |  |
| Impact on normal hobbies                                   | Transport needs                                                                     |                              |  |
| Time doing normal hobbies                                  | Impact on recreational activities and sport                                         |                              |  |
| Playing instrument in usual way                            |                                                                                     |                              |  |
| Ability to play instrument                                 |                                                                                     |                              |  |
| Impact on time spent playing instrument                    |                                                                                     |                              |  |
| Impact on time spent doing sport                           |                                                                                     |                              |  |
| Impact on participation in sport                           |                                                                                     |                              |  |
| Social activities with friends                             | Effect on relationship with                                                         | Social functioning           |  |

**Supplementary file 5: Unique outcomes mapped to potential domains and core areas according to COMET**

|                                              |                                        |                        |                  |                                           |
|----------------------------------------------|----------------------------------------|------------------------|------------------|-------------------------------------------|
| Social activities with neighbours            | family, friends, neighbours and groups |                        |                  |                                           |
| Social activities with family                |                                        |                        |                  |                                           |
| Social activities with groups                |                                        |                        |                  |                                           |
| Dependence on family and friends             |                                        |                        |                  |                                           |
| Appearance interferes with social activities |                                        |                        |                  |                                           |
| Intimate relationships                       | Effect on intimate relationships       |                        |                  |                                           |
| Emotional impact on work                     | Emotional distress/mood                | Emotional functioning  |                  |                                           |
| Energy levels                                |                                        |                        |                  |                                           |
| Emotional impact on ADL                      |                                        |                        |                  |                                           |
| Happiness                                    |                                        |                        |                  |                                           |
| Impact on life enjoyment / satisfaction      |                                        |                        |                  |                                           |
| Emotional impact on relationships            |                                        |                        |                  |                                           |
| Anxiety                                      |                                        |                        |                  |                                           |
| Depression                                   |                                        |                        |                  |                                           |
| Acceptance/ Adjustment                       |                                        |                        |                  | Thoughts and beliefs (acceptance, coping) |
| Coping with trauma                           |                                        |                        |                  |                                           |
| Confidence                                   |                                        |                        |                  |                                           |
| Self esteem                                  | Self esteem and confidence             |                        |                  |                                           |
| Body image                                   | Body image                             |                        |                  |                                           |
| Quality of life                              | Quality of Life                        | Global Quality of Life | Quality of Life  |                                           |
| Rating of health                             | Perceived Health status                | Health status          | Health status    |                                           |
| General patient satisfaction                 | Patient satisfaction                   | Delivery of Care       | Delivery of Care |                                           |
| Satisfaction with appearance of arm          |                                        |                        |                  |                                           |
| Satisfaction with function                   |                                        |                        |                  |                                           |
| Satisfaction with movement                   |                                        |                        |                  |                                           |
| Satisfaction with strength                   |                                        |                        |                  |                                           |

**Supplementary file 5: Unique outcomes mapped to potential domains and core areas according to COMET**

|                              |                                                     |                |                |
|------------------------------|-----------------------------------------------------|----------------|----------------|
| Satisfaction with pain       |                                                     |                |                |
| Satisfaction with colour     |                                                     |                |                |
| Satisfaction with shape      |                                                     |                |                |
| Satisfaction with feeling    |                                                     |                |                |
| Satisfaction with procedure  |                                                     |                |                |
| Patient preference           | Patient preference                                  |                |                |
| Quality of intervention      | Accessibility, quality and adequacy of intervention |                |                |
| Time to surgery              | Time to surgery                                     |                |                |
| Operation time               | Operation time                                      | Resource Use   | Resource Use   |
| Motor morbidity              | Donor site morbidity                                | Adverse Events | Adverse Events |
| Sensory morbidity            |                                                     |                |                |
| Pain                         |                                                     |                |                |
| General complications        | General complications                               |                |                |
| Pneumothorax                 | Respiratory complications                           |                |                |
| Respiratory function         |                                                     |                |                |
| Respiratory symptoms         |                                                     |                |                |
| Pneumonia                    |                                                     |                |                |
| Arterial thrombosis          | Vascular complications                              |                |                |
| Venous thrombosis            |                                                     |                |                |
| Haematoma                    |                                                     |                |                |
| Venous spasm                 |                                                     |                |                |
| Iatrogenic vascular injury   |                                                     |                |                |
| Vascularity of flap          |                                                     |                |                |
| Swelling                     |                                                     |                |                |
| Fracture                     | Musculoskeletal complications                       |                |                |
| Passive range of motion loss |                                                     |                |                |
| Co-contraction               |                                                     |                |                |
| Bowstringing                 |                                                     |                |                |
| Failure of tendon attachment |                                                     |                |                |
| Joint Instability            |                                                     |                |                |
| Scapula crepitus             |                                                     |                |                |

**Supplementary file 5: Unique outcomes mapped to potential domains and core areas according to COMET**

|                         |                         |  |  |
|-------------------------|-------------------------|--|--|
| Infection complications | Infection complications |  |  |
|-------------------------|-------------------------|--|--|

Dodd, S. et al. A taxonomy has been developed for outcomes in medical research to help improve knowledge discovery. *Journal of clinical epidemiology*. 2018, 96: 84–92.

For peer review only

**Supplementary file 6. Measurement of outcomes and measurement tools used**

**Supplementary file 6. Measurement of outcomes and measurement tools used**

56 outcome subdomains in 4 core areas (Physiological/clinical, Life Impact, Resource Use and Adverse events) and within the following COMET domains

Musculoskeletal/connective tissue, Nervous system outcome domain, General outcome and symptom domain, Physical functioning, Role functioning, Emotional functioning, Global quality of life, Perceived health status, Delivery of care, Hospital resources and Adverse Events

| Core Area               | Outcome subdomains                       | Measurement type used (N) |                            |                     |           | Measurement instruments used ( number of studies )                                                                                                                                                                                                                                                                                                                                                                                                                                                                                                                                                                                                                                                                                                                                                           |
|-------------------------|------------------------------------------|---------------------------|----------------------------|---------------------|-----------|--------------------------------------------------------------------------------------------------------------------------------------------------------------------------------------------------------------------------------------------------------------------------------------------------------------------------------------------------------------------------------------------------------------------------------------------------------------------------------------------------------------------------------------------------------------------------------------------------------------------------------------------------------------------------------------------------------------------------------------------------------------------------------------------------------------|
|                         |                                          | Patient reported Outcome  | Clinician reported Outcome | Performance Outcome | Not Clear |                                                                                                                                                                                                                                                                                                                                                                                                                                                                                                                                                                                                                                                                                                                                                                                                              |
| PHYSIOLOGICAL /CLINICAL | <b>Musculoskeletal/connective tissue</b> |                           |                            |                     |           |                                                                                                                                                                                                                                                                                                                                                                                                                                                                                                                                                                                                                                                                                                                                                                                                              |
|                         | Muscle strength                          | 30                        | 129                        | 19                  | 3         | DASH (n= 27), UEFI (n=2), MHQ (n=1),<br><br><b>Manual Muscle Testing</b><br><b>Manual muscle testing undefined (n=5)</b><br><b>MRC muscle grading (n=61 , including UCLA)</b><br><b>MRC muscle grading modified (n= 22),</b><br><i>MRC modified, unclear how (n= 5)</i><br><i>MRC modified, grade 3 active must equal passive (n=2)</i><br><i>MRC modified , grade 2 active must equal passive movement ( n=2)</i><br><i>MRC modified, M3+ contraction with resistance against a finger for less than 30 seconds, M4 contraction of resistance against a finger against a finger for more than 30 seconds (n=1)</i><br><i>MRC modified: M0, M1+, M1, M1+, M2-, M2, M2+,M3-, M3, M3+, M4-, M4, M4+, M5-, M5 ( n=6)</i><br><i>MRC modified, Finger flexion tested with wrist extended 20-30 degrees ( n=1)</i> |



Supplementary file 6. Measurement of outcomes and measurement tools used

|  |  |  |  |  |                                                                                                                                                                                                                                                                                                                                                                                                                                                                                                                                                                                                                                                                                                                                                                                                                                                                                                                                                                                                                                                                                                                                                                                                                                                                                                                                                                                                                                                                                                                                                                                                                                                                                                                              |
|--|--|--|--|--|------------------------------------------------------------------------------------------------------------------------------------------------------------------------------------------------------------------------------------------------------------------------------------------------------------------------------------------------------------------------------------------------------------------------------------------------------------------------------------------------------------------------------------------------------------------------------------------------------------------------------------------------------------------------------------------------------------------------------------------------------------------------------------------------------------------------------------------------------------------------------------------------------------------------------------------------------------------------------------------------------------------------------------------------------------------------------------------------------------------------------------------------------------------------------------------------------------------------------------------------------------------------------------------------------------------------------------------------------------------------------------------------------------------------------------------------------------------------------------------------------------------------------------------------------------------------------------------------------------------------------------------------------------------------------------------------------------------------------|
|  |  |  |  |  | <p>MRC modified, Addition of M4.5 ( n=1)</p> <p>MRC modified, graded two muscles together (n=1)</p> <p>MRC modified, finger extension tested with wrist extension at 20-30 degrees ( n=1)</p> <p>MRC modified, summated muscle score (n=1)</p> <p>MRC modified, FDS tested by stabilising LF and IF to table and testing MF and RF IP flexion (n=1)</p> <p><b>Other manual muscle tests ( n=3)</b></p> <p>Kendall and McCreary testing procedure (n=1)</p> <p>Oxford muscle testing (n=1)</p> <p>Modification of the Louisiana State University Medical Centre grading system (n=1)</p> <p><b>Time to (n= 12)</b></p> <p>contraction (n=7); M2 ( n=1); strength greater than or equal to M3 (n=1); M 3 (n=1); greater than or equal to modified M3 ( n=1); Time to improvement in MRC scale (n= 1)</p> <p><b>Dynanometry (n=23)</b></p> <p>Dynanometry – isokinetic machine, undefined method (n =1)</p> <p>Grip strength JAMAR , undefined method (n=4); Hook grip – isokinetic machine, undefined method (n=1); Grip strength JAMAR, mean of 3 trials n=2); Grip strength , PABLO system, undefined (n=1); Pinch grip, JAMAR, undefined (n= 3), Pinch grip JAMAR, mean 3 trials (n= 1); Peak isometric, hand held dynamometer (n=2); Isometric strength , hand held dynamometer, best of 3 trials (n=1); Isometric strength , Kendall &amp; Kendall positions, 3 trials mean value (n=1); Measurement on digital scales after 5 seconds (n=1)</p> <p>Concentric strength through range, Isokinetics (n=1)</p> <p>Eccentric strength through range, isokinetics (n=1)</p> <p>Combined action of using elbow and hand on digital hanging scale (n=1)</p> <p>Constant-Murley score: dynanometry 90 degrees abduction(n=2)</p> |
|--|--|--|--|--|------------------------------------------------------------------------------------------------------------------------------------------------------------------------------------------------------------------------------------------------------------------------------------------------------------------------------------------------------------------------------------------------------------------------------------------------------------------------------------------------------------------------------------------------------------------------------------------------------------------------------------------------------------------------------------------------------------------------------------------------------------------------------------------------------------------------------------------------------------------------------------------------------------------------------------------------------------------------------------------------------------------------------------------------------------------------------------------------------------------------------------------------------------------------------------------------------------------------------------------------------------------------------------------------------------------------------------------------------------------------------------------------------------------------------------------------------------------------------------------------------------------------------------------------------------------------------------------------------------------------------------------------------------------------------------------------------------------------------|

For peer review only

1  
2  
3  
4  
5  
6  
7  
8  
9  
10  
11  
12  
13  
14  
15  
16  
17  
18  
19  
20  
21  
22  
23  
24  
25  
26  
27  
28  
29  
30  
31  
32  
33  
34  
35  
36  
37  
38  
39  
40  
41  
42  
43  
44  
45  
46

## Supplementary file 6. Measurement of outcomes and measurement tools used

|    |  |  |  |  |  |                                                        |
|----|--|--|--|--|--|--------------------------------------------------------|
| 1  |  |  |  |  |  |                                                        |
| 2  |  |  |  |  |  |                                                        |
| 3  |  |  |  |  |  |                                                        |
| 4  |  |  |  |  |  |                                                        |
| 5  |  |  |  |  |  | <b>Narakas score modified (one study)</b>              |
| 6  |  |  |  |  |  | Thoaraco brachial grasp (n=1)                          |
| 7  |  |  |  |  |  | Elbow flexion with weight (n=1)                        |
| 8  |  |  |  |  |  | Elbow extension with weight (n=1)                      |
| 9  |  |  |  |  |  | Wrist flexion with weight (n=1)                        |
| 10 |  |  |  |  |  | Wrist extension with weight(n=1)                       |
| 11 |  |  |  |  |  | Fist power with weight (n=1)                           |
| 12 |  |  |  |  |  | Pinch power (n=1)                                      |
| 13 |  |  |  |  |  |                                                        |
| 14 |  |  |  |  |  |                                                        |
| 15 |  |  |  |  |  | <b>ULM (one study)</b>                                 |
| 16 |  |  |  |  |  | Shoulder flexion to shoulder height with 500g (n=1)    |
| 17 |  |  |  |  |  | Shoulder flexion above shoulder height with 500g (n=1) |
| 18 |  |  |  |  |  | Shoulder flexion above shoulder with 1kg (n=1)         |
| 19 |  |  |  |  |  | Move weight on table (100g) (n=1)                      |
| 20 |  |  |  |  |  | Move weight on table (500g) (n=1)                      |
| 21 |  |  |  |  |  | Move weight on table (1KG) (n=1)                       |
| 22 |  |  |  |  |  |                                                        |
| 23 |  |  |  |  |  |                                                        |
| 24 |  |  |  |  |  | <b>SHAP (one study)</b>                                |
| 25 |  |  |  |  |  | Grip strength (n=1)                                    |
| 26 |  |  |  |  |  | Pinch strength (n=1)                                   |
| 27 |  |  |  |  |  | Pinch grip (lateral) (n=1)                             |
| 28 |  |  |  |  |  | Pinch grip (tip) (n=1)                                 |
| 29 |  |  |  |  |  | Grip strength (power) (n=1)                            |
| 30 |  |  |  |  |  | Heavy extension (n=1)                                  |
| 31 |  |  |  |  |  |                                                        |
| 32 |  |  |  |  |  |                                                        |
| 33 |  |  |  |  |  |                                                        |
| 34 |  |  |  |  |  | Ability to lift weight, undefined (n=1)                |
| 35 |  |  |  |  |  | Number of repetitions movement can be performed in 10  |
| 36 |  |  |  |  |  | seconds (n=1)                                          |
| 37 |  |  |  |  |  | Maximum weight sustained when flexing elbow (n=1)      |
| 38 |  |  |  |  |  | <b>Unclear (n= 3)</b>                                  |
| 39 |  |  |  |  |  |                                                        |
| 40 |  |  |  |  |  |                                                        |
| 41 |  |  |  |  |  |                                                        |
| 42 |  |  |  |  |  |                                                        |
| 43 |  |  |  |  |  |                                                        |
| 44 |  |  |  |  |  |                                                        |
| 45 |  |  |  |  |  |                                                        |
| 46 |  |  |  |  |  |                                                        |

## Supplementary file 6. Measurement of outcomes and measurement tools used

|  |                                                                                             |   |     |   |    |                                                                                                                                                                                                                                                                                                                                                                                                                                                                  |
|--|---------------------------------------------------------------------------------------------|---|-----|---|----|------------------------------------------------------------------------------------------------------------------------------------------------------------------------------------------------------------------------------------------------------------------------------------------------------------------------------------------------------------------------------------------------------------------------------------------------------------------|
|  |                                                                                             |   |     |   |    | Force recovery: Cross sectional area of the muscle under isometric contraction divided by cross sectional area at rest (n=1)                                                                                                                                                                                                                                                                                                                                     |
|  | Active movement                                                                             | 5 | 103 | 3 | 63 | SST(n=1), MHQ (n=1), UCLA shoulder rating scale (n=1), MPI(n=2), CONSTANT- MURLEY(n=2) (2xPRO, 8x ClinRO), ARAT (PerfO, n=1), ULM (PerfO, n=2), Goniometry(n=48), Visual assessment (n=32), First web space in cm (n=3), Total active movement(n=2), Pulp to palm distance (n=2) Months to full active movement (n=1) Months to antigravity movement (n=3) Months to initial movement (n= 1) Months to independent movement without donor (n=1) Not clear (n=63) |
|  | Passive range of movement                                                                   |   | 6   |   | 7  | Not defined (n=7), Goniometry(n=6)                                                                                                                                                                                                                                                                                                                                                                                                                               |
|  | Movement control and stability                                                              |   | 1   | 1 | 2  | MPI (ClinRo, n=1), ULM (PerfO, n=1), Not clear (n=2)                                                                                                                                                                                                                                                                                                                                                                                                             |
|  | Bone structure/position/healing                                                             |   |     |   | 4  | Not clear (n=4)                                                                                                                                                                                                                                                                                                                                                                                                                                                  |
|  | Muscle mass                                                                                 |   |     |   | 4  | Not clear(n=4)                                                                                                                                                                                                                                                                                                                                                                                                                                                   |
|  | <b>Nervous system outcome subdomains</b>                                                    |   |     |   |    |                                                                                                                                                                                                                                                                                                                                                                                                                                                                  |
|  | General sensory recovery including proprioception                                           |   | 9   |   | 8  | Sensory BMRC (n=5), Modified Sensory BMRC (n= 2), Highet classification(n=2), Not clear (n=8)                                                                                                                                                                                                                                                                                                                                                                    |
|  | Discriminative touch (light touch, two point discrimination, vibration, object recognition) | 1 | 14  |   |    | MHQ (n=1), Cotton wool (n=3), Semmes Weinstein Monofilaments (n=4), Two point discrimination( n=2), Tuning fork (n=4), Not defined (ClinRo, n=1)                                                                                                                                                                                                                                                                                                                 |
|  | Protective touch (pain, temperature, deep pressure)                                         |   | 3   |   | 7  | Blunt pin (n=3), Not clear (n=7)                                                                                                                                                                                                                                                                                                                                                                                                                                 |
|  | Structure of peripheral nervous system                                                      |   | 1   |   |    | MRI (n=1)                                                                                                                                                                                                                                                                                                                                                                                                                                                        |
|  | Reinnervation (level of reinnervation, time to innervation)                                 |   | 54  |   |    | Two point scale on EMG(n=1) Four point scale on EMG (n=4), Not clear EMG (n= 49)                                                                                                                                                                                                                                                                                                                                                                                 |
|  | Progression of regeneration                                                                 |   | 5   |   |    | Tinel sign (n=5)                                                                                                                                                                                                                                                                                                                                                                                                                                                 |
|  | Speed of motor and sensory conduction                                                       |   | 9   |   |    | EMG (n=9)                                                                                                                                                                                                                                                                                                                                                                                                                                                        |
|  | <b>General outcomes / symptoms</b>                                                          |   |     |   |    |                                                                                                                                                                                                                                                                                                                                                                                                                                                                  |

## Supplementary file 6. Measurement of outcomes and measurement tools used

|                                |                                                                                |    |   |   |           |                                                                                                                                                                                                                                                                                             |
|--------------------------------|--------------------------------------------------------------------------------|----|---|---|-----------|---------------------------------------------------------------------------------------------------------------------------------------------------------------------------------------------------------------------------------------------------------------------------------------------|
|                                | Pain intensity/ relief                                                         | 73 |   |   | 3         | DASH (n=27), ASES (n=1), TAPES (n=1), VAS(n=18), NRS(n=12),MHQ (n=1) WBFERS(n=1), BPI (n= 1), UNWNS (n=1), McGill Pain Questionnaire SF (n=2), McGill pain questionnaire (n= 1), MPI (n=1), CONSTANT-MURLEY (n=2), 4 point scale (n=3) Author developed questionnaire(n=1), Not Clear (n=3) |
|                                | Pain duration or frequency                                                     | 12 | 0 | 0 | 0         | SST (n=1), SF36 (n=5), MHQ (n=1),TAPES(n=1), NPSI (n=1), BPI (n= 1), UCLA shoulder rating score (n=1), Not described PRO (n=1)                                                                                                                                                              |
|                                | Pain quality                                                                   | 7  |   |   |           | TAPES (n= 1), NPSI(n=1), UWNS(n= 1), McGill SF(n=2), McGill (n=1), Non described PRO (n =1)                                                                                                                                                                                                 |
|                                | Pain when arm exposed to cold                                                  | 1  |   |   |           | NPSI (n=1)                                                                                                                                                                                                                                                                                  |
|                                | Paraesthesia                                                                   | 27 |   |   |           | DASH (n=27)                                                                                                                                                                                                                                                                                 |
|                                | Sensitivity to touch, pressure, vibration etc                                  | 3  |   |   |           | NPSI (n=1) UWNS (n= 1), NRS (n=1)                                                                                                                                                                                                                                                           |
|                                | Location of pain                                                               | 1  |   |   |           | BPI (n=1)                                                                                                                                                                                                                                                                                   |
|                                | Pain medication use                                                            | 1  |   |   |           | BPI(n=1)                                                                                                                                                                                                                                                                                    |
|                                | Stiffness                                                                      | 27 |   |   |           | DASH (n=27)                                                                                                                                                                                                                                                                                 |
| <b>LIFE IMPACT</b>             | <b>Physical functioning</b>                                                    |    |   |   |           |                                                                                                                                                                                                                                                                                             |
|                                | Physical function non-specific                                                 | 2  |   |   |           | PSFS (n=1), TAPES (n=1)                                                                                                                                                                                                                                                                     |
|                                | Lower limb and non-upper limb function (walking, running, climbing stairs etc) | 7  |   |   | 1         | SF36 (n=5), TAPES (n= 1), BPI (n=1) Non described PRO (n=1)                                                                                                                                                                                                                                 |
|                                | Reaching, pulling, pushing, carrying, throwing , lifting                       | 37 |   | 3 |           | DASH (n=27), UEFI (n=2), MHQ(n=1), ASES(n=1), SST (n=1), SF36(n=5), ARAT(n=1), AMULA ( n=1) UNBtP ( n=1)                                                                                                                                                                                    |
|                                | Turning twisting, gripping and releasing with the arm                          | 30 |   | 5 | 1         | DASH (n=27), UEFI (n=2), MHQ (n=1),ARAT(n=1),SHAP(n= 1), JHFT (n=1), AMULA (n=1), UNBtP (n=1), Not clear (n=1)                                                                                                                                                                              |
|                                | Fine hand movement include writing                                             | 30 |   | 6 |           | DASH (n=27), UEFI (n=2), MHQ (n=1),ARAT(n=1), SHAP(n=1), JHFT (n=1) Purdue Peg test (n=1),AMULA (n=1), UNBtP (n=1)                                                                                                                                                                          |
|                                | <b>Role Functioning</b>                                                        |    |   |   |           |                                                                                                                                                                                                                                                                                             |
|                                | Impact on return to work                                                       | 41 |   |   |           | DASH (n =27), UEFI (n=2),MHQ (n=1), ASES (n=1), SST (n=1), SF36 (n=5), TAPES (n=1), MPI (n=1) No description PRO (n=1), Questionnaire no data ( n=1)                                                                                                                                        |
| Role function patient specific | 1                                                                              |    |   |   | PSFS(n=1) |                                                                                                                                                                                                                                                                                             |

## Supplementary file 6. Measurement of outcomes and measurement tools used

|                                                                                     |    |   |   |  |                                                                                                                                                                                                                           |
|-------------------------------------------------------------------------------------|----|---|---|--|---------------------------------------------------------------------------------------------------------------------------------------------------------------------------------------------------------------------------|
| Carrying out daily routine, (including food preparation, housework, garden, plants) | 36 | 1 | 5 |  | DASH (n=27), UEFI (n=2), MHQ (n=1), TAPES(n=1), BPI (n=1), UCLA (n=1), SHAP (n=1), Jebesen (n=1), ULM (n=1)<br>Questionnaire not defined (n=2), No description PRO (n=1)<br>Unclear CLinRO(n=1), AMULA (n=1), UNBtP (n=1) |
| Maintaining personal hygiene                                                        | 35 |   | 2 |  | DASH (n=27), ASES (n=1), SST(n=1), SF36(n=5), MHQ(n=1)<br>AMULA (n=1), UNBtP (n=1)                                                                                                                                        |
| Maintaining personal appearance                                                     | 3  |   | 1 |  | UEFI (n=2), ASES (n=1), AMULA (n=1)                                                                                                                                                                                       |
| Dressing                                                                            | 32 |   | 2 |  | DASH (n=27), UEFI (n=2), MHQ (n=1), ASES (n=1), SST (n=1),<br>AMULA (n=1) SHAP(n=1)                                                                                                                                       |
| Transport needs                                                                     | 29 |   |   |  | DASH (n=27), UEFI (n=2),                                                                                                                                                                                                  |
| Impact on recreational activities and sport                                         | 34 |   |   |  | DASH (n=27), UEFI (n=2), ASES (n=1), TAPES(n=1), CONSTANT-<br>MURLEY (n=2), Not described PRO (n=1)                                                                                                                       |
| <b>Social functioning</b>                                                           |    |   |   |  |                                                                                                                                                                                                                           |
| Effect on relationship with family, friends, neighbours and groups                  | 34 |   |   |  | DASH (n=27), SF36 (n=5), TAPES (n=1), MHQ (n=1)                                                                                                                                                                           |
| Effect on intimate relationships                                                    | 27 |   |   |  | DASH (n=27)                                                                                                                                                                                                               |
| <b>Emotional Functioning</b>                                                        |    |   |   |  |                                                                                                                                                                                                                           |
| Emotional distress/ mood                                                            | 11 |   |   |  | SF36 (n=5), TAPES (n=1), BPI(n=1), UWNS(n=1), Self-rated<br>anxiety scale (n=1), Self-rated depression scale (n=1), MHQ<br>(n=1)                                                                                          |
| Thoughts and beliefs ( acceptance and adjustment)                                   | 1  |   |   |  | TAPES (n=1)                                                                                                                                                                                                               |
| Self-esteem and self confidence                                                     | 28 |   |   |  | DASH (n=27), TAPES(n=1)                                                                                                                                                                                                   |
| Body image                                                                          | 3  |   |   |  | MHQ (n=2), Not described (n=1)                                                                                                                                                                                            |
| <b>Sleep and overall health</b>                                                     |    |   |   |  |                                                                                                                                                                                                                           |
| Impact on sleep                                                                     | 37 |   |   |  | DASH (n=27), UEFI (n=3), ASES(n=1), MHQ (n=1), SST (n=1),<br>BPI(n=1), CONSTANT- MURLEY(n=2), Not described PRO (n=1)                                                                                                     |
| <b>General Quality of life</b>                                                      | 1  |   |   |  | Not described PRO (n=1)                                                                                                                                                                                                   |
| <b>Perceived Health Status</b>                                                      | 6  |   |   |  | SF36 (n=5), TAPES (n=1)                                                                                                                                                                                                   |
| <b>Delivery of Care</b>                                                             |    |   |   |  |                                                                                                                                                                                                                           |
| Patient satisfaction                                                                | 10 |   |   |  | TAPES (n=1), UCLA (n=1), MHQ (n=1), 10-point scale (n=1)                                                                                                                                                                  |

## Supplementary file 6. Measurement of outcomes and measurement tools used

|                 |                                                     |   |    |  |    |                                                                                                          |
|-----------------|-----------------------------------------------------|---|----|--|----|----------------------------------------------------------------------------------------------------------|
|                 |                                                     |   |    |  |    | 4 point scale (n=2), 3 point likert scale (n=1), Questionnaire not described (n=1), Not defined PRO(n=2) |
|                 | Patient preference for treatment                    | 1 |    |  |    | Not described (n=1)                                                                                      |
|                 | Accessibility, quality and adequacy of intervention |   |    |  | 1  | 4 point scale (n=1)                                                                                      |
| <b>RESOURCE</b> | <b>Hospital</b>                                     |   |    |  |    |                                                                                                          |
|                 | Operation time                                      |   |    |  | 1  | Not described (n=1)                                                                                      |
|                 | <b>Adverse Events</b>                               |   |    |  |    |                                                                                                          |
| <b>ADVERSE</b>  | Donor site motor morbidity to include weakness      |   | 18 |  | 19 | BMRC (n=7), BMRC modified(n=2), Dynanometry (n=8), EMG(n=1)<br>Not clear (n=19)                          |
|                 | Donor site sensory morbidity                        | 1 | 3  |  | 4  | 10-point scale PRO (n=1)<br>Not defined (n=4), 2PD (n=2), Monofilaments (n=1)                            |
|                 | Donor site morbidity -pain                          | 3 |    |  |    | Not defined PRO (n=3)                                                                                    |

## Supplementary file 6. Measurement of outcomes and measurement tools used

|  |                               |     |     |    |     |                                                                                          |
|--|-------------------------------|-----|-----|----|-----|------------------------------------------------------------------------------------------|
|  | General complications         |     |     |    | 2   | Unclear (n=2)                                                                            |
|  | Respiratory complications     | 1   | 5   |    | 4   | 4 point scale PRO (n=1), x-ray (n=2), FEV (n=1), TLC(n=1), MVV (n=1), Not defined (n=4), |
|  | Vascular complications        |     | 2   |    | 13  | Not defined (n=13), Visual assessment (n=1), USS (n=1)                                   |
|  | Musculoskeletal complications |     | 2   |    | 19  | Not defined CLinRO(n=2), Unclear (n=19)                                                  |
|  | Infection complications       |     | 1   |    | 2   | Not defined ClinRo(n=1), Unclear (n=2)                                                   |
|  |                               | 669 | 366 | 46 | 168 |                                                                                          |

*DASH* Disabilities of the arm shoulder and hand, *UEFI* Upper Extremity Functional Index, *MHQ* Michigan Hand Questionnaire, *BMRC* British Medical Research Council, *ULM* Upper Limb Module, *SHAP* Southampton Hand Assessment Procedure, *SST* Simple Shoulder Test, *MPI* Mayo clinic Performance Index for the elbow, *ARAT* Action Research Arm Test, *ClinRO* Clinician Reported Outcome, *Perfo* Performance Outcome, *PRO* Patient Reported Outcome, *ASES* American Shoulder and Elbow Surgeons Index, *TAPES* The Trinity Amputation and Prosthesis Experience Scales, *VAS* Visual Analogue Scale, *NRS* Numerical Rating Scale, *WBFRS* Wong Baker Faces Rating Scale, *UNWNS* University of Washington Neuropathic pain Score, *SF36* Short Form 36 health survey, *NPSI* Neuropathic Pain Symptom Inventory, *BPI* Brief Pain Inventory, *PSFS* Pain Specific Functional Scale, *AMULA* American Measures for Upper Limb Amputees, *UNBPT* University of New Brunswick test of Prosthetics function, *JHFT* Jebsen Hand Function Test, *FEV* Forced Expiratory Volume, *TLC* Tidal Lung Capacity, *MVV* maximal voluntary ventilation, *USS* Ultrasound Scan.

# BMJ Open

## Developing a core outcome set for traumatic brachial plexus injuries: a systematic review of outcomes.

|                                 |                                                                                                                                                                                                                                                                                                                                                                                                                                                                                                                                                          |
|---------------------------------|----------------------------------------------------------------------------------------------------------------------------------------------------------------------------------------------------------------------------------------------------------------------------------------------------------------------------------------------------------------------------------------------------------------------------------------------------------------------------------------------------------------------------------------------------------|
| Journal:                        | <i>BMJ Open</i>                                                                                                                                                                                                                                                                                                                                                                                                                                                                                                                                          |
| Manuscript ID                   | bmjopen-2020-044797.R2                                                                                                                                                                                                                                                                                                                                                                                                                                                                                                                                   |
| Article Type:                   | Original research                                                                                                                                                                                                                                                                                                                                                                                                                                                                                                                                        |
| Date Submitted by the Author:   | 08-Jun-2021                                                                                                                                                                                                                                                                                                                                                                                                                                                                                                                                              |
| Complete List of Authors:       | Miller, Caroline; University of East Anglia, School of Health Sciences, The Queens Building ; Queen Elizabeth Hospital Birmingham, Physiotherapy Department<br>cross, jane; University of East anglia, school AHP<br>O'Sullivan, Joel; Queen Elizabeth Hospital Birmingham, Physiotherapy<br>Power, Dominic; Queen Elizabeth Hospital Birmingham, The Birmingham Peripheral Nerve Injury Service<br>Kyte, Derek; University of Birmingham, Institute of Applied Health Research<br>Jerosch-Herold, Christina; University of East Anglia, Health Sciences |
| <b>Primary Subject Heading</b>: | Neurology                                                                                                                                                                                                                                                                                                                                                                                                                                                                                                                                                |
| Secondary Subject Heading:      | Emergency medicine, Rehabilitation medicine, Surgery                                                                                                                                                                                                                                                                                                                                                                                                                                                                                                     |
| Keywords:                       | Neurological injury < NEUROLOGY, Limb reconstruction < ORTHOPAEDIC & TRAUMA SURGERY, Plastic & reconstructive surgery < SURGERY, Neurological pain < NEUROLOGY, Elbow & shoulder < ORTHOPAEDIC & TRAUMA SURGERY, Trauma management < ORTHOPAEDIC & TRAUMA SURGERY                                                                                                                                                                                                                                                                                        |
|                                 |                                                                                                                                                                                                                                                                                                                                                                                                                                                                                                                                                          |

SCHOLARONE™  
Manuscripts





I, the Submitting Author has the right to grant and does grant on behalf of all authors of the Work (as defined in the below author licence), an exclusive licence and/or a non-exclusive licence for contributions from authors who are: i) UK Crown employees; ii) where BMJ has agreed a CC-BY licence shall apply, and/or iii) in accordance with the terms applicable for US Federal Government officers or employees acting as part of their official duties; on a worldwide, perpetual, irrevocable, royalty-free basis to BMJ Publishing Group Ltd ("BMJ") its licensees and where the relevant Journal is co-owned by BMJ to the co-owners of the Journal, to publish the Work in this journal and any other BMJ products and to exploit all rights, as set out in our [licence](#).

The Submitting Author accepts and understands that any supply made under these terms is made by BMJ to the Submitting Author unless you are acting as an employee on behalf of your employer or a postgraduate student of an affiliated institution which is paying any applicable article publishing charge ("APC") for Open Access articles. Where the Submitting Author wishes to make the Work available on an Open Access basis (and intends to pay the relevant APC), the terms of reuse of such Open Access shall be governed by a Creative Commons licence – details of these licences and which [Creative Commons](#) licence will apply to this Work are set out in our licence referred to above.

Other than as permitted in any relevant BMJ Author's Self Archiving Policies, I confirm this Work has not been accepted for publication elsewhere, is not being considered for publication elsewhere and does not duplicate material already published. I confirm all authors consent to publication of this Work and authorise the granting of this licence.

1  
2  
3 1 **Title Page**  
4  
5

6 2  
7  
8

9 3 **Title of article**  
10

11 4 **Developing a core outcome set for traumatic brachial plexus injuries: a**  
12  
13

14 5 **systematic review of outcomes.**  
15  
16

17 6  
18

19 7  
20

21 8 **Corresponding author**  
22

23 9 Caroline Miller (corresponding author)  
24

25 10 School of Health Sciences,  
26

27 11 University of East Anglia,  
28

29 12 Norwich,  
30

31 13 UK,  
32

33 14 NR4 7TJ  
34

35 15 Tel no: 00447743501508  
36

37 16 Email: [caroline.miller@uea.ac.uk](mailto:caroline.miller@uea.ac.uk)  
38

39 17 Twitter handle: @c\_ahern26  
40  
41

42 18

43 19 **Co-authors**  
44

45 20 **Jane Cross**  
46

47 21 School of Health Sciences,  
48

49 22 University of East Anglia,  
50

51 23 Norwich,  
52

53 24 UK,  
54

55 25 Twitter handle: @JaneCross12  
56  
57

58 26  
59

60 27  
28

1  
2  
3 1 **Joel O Sullivan,**  
4  
5 2 Physiotherapy Department,  
6  
7 3 Queen Elizabeth Hospital Birmingham,  
8  
9 4 Birmingham  
10  
11 5 UK,  
12  
13 6 Twitter handle: @jos2305  
14  
15 7

16 8 **Dominic M Power,**  
17  
18 9 The Birmingham Peripheral Nerve Injury Service,  
19  
20 10 Queen Elizabeth Hospital Birmingham,  
21  
22 11 Birmingham,  
23  
24 12 UK,  
25  
26 13 @dominicpower1  
27  
28 14

29  
30 15 **Derek G Kyte,**  
31  
32 16 Centre for Patient-Reported Outcomes Research,  
33  
34 17 University of Birmingham,  
35  
36 18 Birmingham,  
37  
38 19 UK  
39  
40 20

41 21 **Christina Jerosch-Herold,**  
42  
43 22 School of Health Sciences,  
44  
45 23 University of East Anglia,  
46  
47 24 Norwich,  
48  
49 25 UK,  
50  
51 26 Twitter handle: @tinajerosch  
52  
53 27  
54  
55 28

56  
57 29 **Word count, 3,797**  
58  
59 30  
60

## ABSTRACT

**Objective** To identify what outcomes have been assessed in traumatic brachial plexus injury (TBPI) research to inform the development of a Core Outcome Set for TBPI.

**Design** Systematic review

**Method** Medline (OVID), EMBASE, CINAHL, and AMED were systematically searched for studies evaluating the clinical effectiveness of interventions in adult traumatic brachial plexus injuries from January 2013 to September 2018 updated in May 2021. Two authors independently screened papers. Outcome reporting bias was assessed. All outcomes were extracted verbatim from studies. Outcomes from patient reported or performance outcome measures were extracted directly from the instrument. Variation in outcome reporting was determined by assessing the number of unique outcomes reported across all included studies. Outcomes were categorized into domains using a prespecified taxonomy.

**Results** Verbatim outcomes (n= 1491) were extracted from 138 studies including 32 questionnaires. Unique outcomes (n= 157) were structured into four core areas and 11 domains. Outcomes within the musculoskeletal domain were measured in 86% of studies, physical functioning in 25%, emotional functioning in 25% and adverse events in 33%. We identified 63 different methods for measuring muscle strength, 16 for range of movement and 63 studies did not define how they measured movement. Over 2/3rds of outcomes were incompletely reported in prospective studies.

**Conclusion** This review of outcome reporting in traumatic brachial plexus injury research demonstrated an impairment focus and heterogeneity. A core outcome set would ensure

1  
2  
3 1 standardized and relevant outcomes are reported to facilitate future systematic review and  
4  
5  
6 2 meta-analysis.  
7

8  
9 3

10  
11 4 **Prospero registration number:** CRD42018109843  
12  
13

14 5  
15

## 16 6 **Strengths and limitations of this study**

- 17  
18  
19 7 • This study is a comprehensive and systematic review of all reported clinical  
20  
21  
22 8 outcomes reported in traumatic brachial plexus studies from 2013- 2021 inclusive.  
23  
24  
25 9 • Unique outcomes were systematically categorized into a clear taxonomy to inform  
26  
27 10 the development of a core outcome set.  
28  
29  
30 11 • Definition of unique outcomes and categorisation was conducted by researchers and  
31  
32 12 clinicians to account for multidisciplinary perspectives.  
33  
34  
35 13 • Outcome reporting bias was assessed in included prospective and randomized  
36  
37 14 controlled trials  
38  
39

40 15  
41  
42

43 16  
44  
45

46 17  
47  
48

49 18  
50  
51  
52  
53  
54  
55  
56  
57  
58  
59  
60

1

2

## INTRODUCTION

3 A traumatic brachial plexus injury (TBPI) is a major injury to the brachial plexus. It can result  
4 in significant functional, social, psychological and economic effects, [1,2] with most  
5 occurring in young men as a result of motorbike accidents,[3]. Survival from major trauma is  
6 increasing,[4] and with this an increase in the incidence of TBPI,[5] which accounts for 1.2%  
7 of polytrauma,[6].The complex and chronic nature of the injury is associated with significant  
8 healthcare costs,[7] in addition to indirect costs estimated at up to \$2.34 million (in 2017  
9 dollars) over the lifetime of an manual labourer in the USA with a TBPI,[8]. There are  
10 multiple strategies for managing a patient with a TBPI with recent advancements in nerve  
11 microsurgery,[9] and robotics,[10] resulting in increased treatment options. The choice of  
12 treatment should be made using up-to-date, high quality scientific evidence,[11,12].  
13  
14 Ideally, a meta-analysis would identify the most effective treatment for an individual with a  
15 TBPI, however, such analysis requires homogenous outcome measurement and reporting  
16 across studies to enable optimum synthesis. Indeed, despite increasing numbers of TBPI  
17 studies, outcome heterogeneity and poorly defined outcomes has been highlighted as a  
18 significant challenge to evidence synthesis in two recent systematic reviews,[13,14]. There is  
19 now international agreement that the definition of a core outcome set (COS) for TBPI is a  
20 priority,[15,16]. A COS is a minimum agreed set of outcomes to be reported and measured  
21 in all studies,[17,18]. Development of a COS has been shown to reduce heterogeneity of  
22 outcome reporting in other health conditions, with 81% of trialists in rheumatoid arthritis  
23 (RA) now measuring the COS for RA,[19].

1  
2  
3 1 To date a minimum set of outcomes, important to patients and professionals for reporting  
4  
5 2 in TBPI studies, has not been agreed. The choice of what are important outcomes to  
6  
7  
8 3 measure in TBPI is complex due to patient heterogeneity with different mechanisms,  
9  
10 4 locations and severity of injury. COS methodology is continuously being refined and  
11  
12 5 promoted by the Core Outcome Measures in Effectiveness Trials (COMET) initiative [20].  
13  
14  
15 6 Development of a COS usually begins with identification of a long list of outcomes which is  
16  
17 7 then prioritised through a consensus process. This systematic review sits within the larger  
18  
19 8 global COMBINE project to identify a COS for TBPI. A Delphi study and consensus meeting,  
20  
21 9 informed by data from this systematic review and interviews with people with the injury,  
22  
23 10 will prioritise the final COS for TBPI.  
24  
25  
26  
27  
28  
29

30 12 As a first step in the development of an international COS for TBPI we conducted a  
31  
32 13 systematic review to identify outcomes reported and measurement instruments used and  
33  
34 14 their timing in the literature. The final step of the global project will match the COS to  
35  
36 15 existing validated measurement instruments and make recommendations on when they  
37  
38 16 should be collected, therefore it was necessary to identify currently used instruments and  
39  
40 17 their timepoints also.  
41  
42  
43  
44  
45  
46  
47  
48  
49  
50  
51  
52  
53  
54  
55  
56  
57  
58  
59  
60

1 The aim of this review was to:

- 2 1. Identify what outcome domains are assessed in studies evaluating surgical and non-
- 3 surgical treatment for TBPI.
- 4 2. Compare the definitions of outcomes and time points of outcomes assessed.
- 5 3. Assess selective reporting bias in included prospective studies and randomized
- 6 controlled trials.
- 7 4. Identify how the outcomes were measured, that is what validated or non-validated
- 8 instruments are used.

## 14 METHODS

15 We followed the methods described in the Cochrane Handbook for Systematic Reviews of  
16 Interventions,[21] and report in accordance with the Preferred Reporting Items for  
17 Systematic Reviews and Meta-Analysis (PRISMA) guidelines,[22]. The systematic review  
18 protocol was prospectively registered with PROSPERO (PROSPERO registration number:  
19 CRD42018109843). Deviations from the protocol are reported in supplementary file 1.

### 21 Identification of studies

22 We conducted an electronic search of Medline (OVID), EMBASE (OVID), CINAHL and AMED  
23 on the 18<sup>th</sup> September 2018. Studies published between 01 Jan 2013 and 18 September  
24 2018 were included to reflect outcomes employed in current TBPI care. An example of the  
25 search strategy for Ovid MEDLINE is presented in supplementary file 2. The thesaurus  
26 vocabulary of each database was used to adapt search terms. Boolean operators (AND, OR)



1 were used to narrow or widen the search and no language restrictions were applied. The  
2 search was rerun on the 07 May 2021 to identify any additional outcomes.

### 3 4 **Study eligibility**

5 Studies were included if they met the following criteria:

6 *Study type:* Any controlled and uncontrolled experimental and observational studies  
7 evaluating interventions in traumatic brachial plexus injury including case reports, case  
8 series, case studies, prospective and retrospective cohort studies, randomized and non-  
9 randomized clinical trials. When the search was rerun in May 2021 only prospective cohort  
10 and clinical trials were included. We excluded conference proceedings, abstract only  
11 publications and those not involving human subjects.

12 *Participants:* Studies reporting outcomes in individuals with traumatic brachial plexus injury  
13 aged 16 years or over. Studies of patients with obstetric brachial plexus injuries were  
14 excluded.

15 *Interventions:* Any surgical or non-surgical intervention for TBPI.

16 *Outcomes:* All outcomes reported in the published abstract, methods or results. These  
17 included physiological and functional outcomes, adverse events and patient reported  
18 outcomes (PROs) either reported in the study or subsequently extrapolated from the PRO  
19 instruments.

20 *Language:* Non-English language publications were included

21

22

## 1 **Study selection process**

2 The reference management software Mendeley was used to compile the literature, with  
3 duplicates removed. Authors (X and X) independently screened the titles and then the  
4 abstracts against the eligibility criteria. Disagreements were discussed and a third reviewer  
5 (x) was involved where required. Studies appearing to meet the inclusion criteria based on  
6 title and abstract were retrieved as full text articles, and were read to assess for eligibility  
7 with decisions on inclusion and exclusion recorded. Disagreements in study selection were  
8 resolved by discussion within the research team (x, x, x).

## 11 **Quality assessment**

12 The aim of this review was to identify outcomes reported in studies rather than synthesise  
13 data on intervention effectiveness. However, selective outcome reporting can provide  
14 information on what outcomes authors prioritize. We used a modified version of Kirkham et  
15 al's matrix [23, 24] to assess outcome reporting bias (ORB) in prospective studies and  
16 randomized controlled trials (See ORB instrument in supplementary file 3). Two  
17 independent reviewers (XX &XX) performed the assessment of ORB for all outcomes.

## 20 **Data Extraction**

21 Data were extracted into a piloted data extraction sheet (Microsoft Excel). General data  
22 extracted from each study included author, study design, recruiting country, publication  
23 year, number of participants, gender, mean age, level of TBPI and intervention tested. The  
24 following information was extracted regarding outcomes: each outcome reported

1 (verbatim), area of body assessed if relevant (shoulder, elbow, wrist or hand), method of  
2 administration, name of measure, timepoints of measure and reported complications. The  
3 number of outcomes per study was also documented.

4  
5 Data extraction was performed independently by X and X for the first 20% of included  
6 studies. These were compared, and disagreements discussed and resolved through debate  
7 or discussion with a third reviewer (X). Following this a further ten percent of studies had  
8 data extracted by both X and X. Due to the high level of agreement between reviewers (  
9 91% agreement) on outcomes extracted, at this stage, the remaining studies underwent  
10 extraction by a single reviewer (X).

11  
12 Where a validated PRO or performance outcome measurement was used and composed of  
13 multiple items, the following data was extracted by the first author: verbatim name of the  
14 instrument, verbatim wording for each individual item. A performance outcome  
15 measurement was defined as “A measurement based on a standardized task performed by  
16 a patient that is administered and evaluated by an appropriately trained individual or is  
17 independently completed” [25]. The frequency of use of instruments was noted and  
18 compared between studies. The instruments were categorized as: (i) General Health  
19 (generic - for use with any patient); (ii) Upper limb physical function (region-specific); (iii)  
20 Symptom or domain specific (to assess a single symptom e.g. pain) and (iv) Condition  
21 Specific. Timepoints of measurement of all outcomes were noted. If the outcome was  
22 assessed at different timepoints then all timings were recorded.

23

## 1 **Classification of outcomes into domains and defining unique outcomes**

2 Identically worded and spelled verbatim outcomes were removed at this stage. Identical  
3 outcomes measured over different time points were noted as one outcome. Where  
4 outcomes were assessed using an instrument containing several items, each individual item  
5 was assigned an outcome name using the International Classification of Functioning and  
6 following standard linking rules,[26].

7  
8 X categorized all outcomes into an outcome taxonomy developed by COMET for  
9 categorizing outcomes for core outcome set development,[27]. These included 5 core areas  
10 and 38 outcome domains. This is presented in supplementary file 4. A long list of all  
11 categorized outcomes was presented to researchers (X and X) at a face to face meeting  
12 where the categorization of all outcomes was reviewed using the recommended taxonomy.  
13 Subdomains were created within the larger taxonomy to manage the large variation in TBPI  
14 clinical outcomes extracted. Disagreements not resolved at this stage were discussed  
15 further with subject experts (for example, the Adverse Event domain was discussed with a  
16 surgeon).

17 Due to the diversity in terminology used to report outcomes, we grouped similar outcomes  
18 within each subdomain. It is recommended that outcomes with different words, phrasing,  
19 or spelling addressing the same concept should be categorized as a unique outcome,[28].  
20 For example, active range of motion of shoulder abduction and active goniometry of  
21 shoulder abduction were named as active shoulder abduction range and grasp strength and  
22 grip strength were named as grip strength. Independent meetings were held with four  
23 subject experts to ratify and define unique outcome names within each domain.

24

## **Patient and public involvement**

The need for a COS in TBPI care was conceived following discussions with patients and health professionals. Patients highlighted the diverse effect the injury has on their life and that often these outcomes were overlooked by professionals, such as body image. There is a patient advisory group for the COS and the systematic review was discussed at these meetings. Patients were not actively involved in data collection or analysis of this review. Dissemination will occur at the annual traumatic brachial plexus charity UK meeting where updates from the project are presented yearly and through a six monthly newsletter.

## **RESULTS**

### **Included studies**

The searches retrieved 2819 studies, after removing duplicates 2051 studies remained. Titles and abstract review identified 243 potentially relevant articles. Of these, 105 studies did not meet the inclusion criteria and were excluded (PRISMA flow diagram; figure 1) thus, 138 studies formed the basis of this review. All included studies are presented in supplementary file 5.

Place figure 1 here

Figure 1. Preferred Reporting Items for Systematic Reviews and meta-analysis flow diagram.

1  
2  
3 1  
4  
5  
6 2  
7  
8 3  
9  
10 4  
11  
12  
13 5  
14  
15 6  
16  
17 7  
18  
19  
20 8  
21  
22  
23 9  
24  
25 10  
26  
27  
28 11  
29  
30 12  
31  
32 13  
33  
34 14  
35  
36 15  
37  
38 16  
39  
40 17  
41  
42 18  
43  
44 19  
45  
46 20  
47  
48 21  
49  
50 22  
51  
52 23  
53  
54 24  
55  
56  
57  
58  
59  
60

## Study characteristics

Thirty-three countries from six continents recruited 3328 participants into the 138 studies (Table 1). Of the 138 studies, 87 (63%) were retrospective case series with most studies published from Asia (n=62, 45%). The most frequently studied surgical intervention was nerve transfers (n=66, 48%).

For peer review only

1 Table 1. Characteristics and demographics of included studies

2

|                                                | Study number (%) |
|------------------------------------------------|------------------|
| Number of retrospective studies                | 87/138(63)       |
| Number of prospective studies                  | 24/138 (17)      |
| Number of case studies                         | 23/138(17)       |
| Randomized controlled trial                    | 4/138 (3)        |
| <b>World region recruitment</b>                |                  |
| Asia                                           | 62/138(45)       |
| North America                                  | 20/138(14)       |
| South America                                  | 23/138(17)       |
| Europe                                         | 28/138(20)       |
| Africa                                         | 3/138(2.2)       |
| Australasia                                    | 2/138(1.5)       |
| <b>Year published</b>                          |                  |
| 2013                                           | 25/138(18)       |
| 2014                                           | 24/138(17)       |
| 2015                                           | 15/138(11)       |
| 2016                                           | 30/138(22)       |
| 2017                                           | 27/138(20)       |
| 2018                                           | 11/138(8)        |
| 2019 (prospective only)                        | 3/138 (2.2)      |
| 2020 (prospective only)                        | 2/138 (1.5)      |
| 2021 (prospective only)                        | 1/138 (0.7)      |
| <b>Gender (total 3328)</b>                     |                  |
| Male                                           | 2737/3328(82)    |
| Female                                         | 335/3328(10)     |
| Not stated                                     | 256/3328(7.7)    |
| <b>Site of plexus injury per study (n=138)</b> |                  |
| Upper trunk                                    | 27/138(20)       |

|    |                                               |             |
|----|-----------------------------------------------|-------------|
| 1  |                                               |             |
| 2  |                                               |             |
| 3  |                                               |             |
| 4  | Lower trunk                                   | 10/138(7.2) |
| 5  | Pan plexus (all avulsed)                      | 52/138(38)  |
| 6  |                                               |             |
| 7  | Infraclavicular                               | 7/138(5)    |
| 8  |                                               |             |
| 9  | Mixture                                       | 35/138(25)  |
| 10 |                                               |             |
| 11 | Unclear                                       | 7/138(5)    |
| 12 |                                               |             |
| 13 | <b>Interventions (n=138)</b>                  |             |
| 14 |                                               |             |
| 15 | Surgical                                      | 118/138(86) |
| 16 |                                               |             |
| 17 | Electrotherapy                                | 3/138(2.2)  |
| 18 |                                               |             |
| 19 | Pain treatments                               | 11/138 (8)  |
| 20 |                                               |             |
| 21 | Rehabilitation                                | 4/138(2.9)  |
| 22 |                                               |             |
| 23 | Orthotic                                      | 1/138(0.7)  |
| 24 |                                               |             |
| 25 | Stem cell                                     | 1/138(0.7)  |
| 26 |                                               |             |
| 27 | <b>Types of surgical intervention (n=118)</b> |             |
| 28 |                                               |             |
| 29 | Neurotization                                 | 66/118(56)  |
| 30 |                                               |             |
| 31 | Tendon transfer                               | 8/118(6.8)  |
| 32 |                                               |             |
| 33 | Free flap                                     | 17/118(14)  |
| 34 |                                               |             |
| 35 | Multiple surgeries                            | 12/118(10)  |
| 36 |                                               |             |
| 37 | Contralateral C7                              | 8/118(6.8)  |
| 38 |                                               |             |
| 39 | Other                                         | 7/118(5.9)  |

1  
2  
3  
4  
5  
6  
7  
8  
9  
10  
11  
12  
13  
14



## 1 **Outcomes**

2 Extraction of each verbatim outcome domain from each study (e.g range of movement and  
3 muscle strength) and those extracted from measures composed of several items identified a  
4 total of 1491 verbatim outcomes. After removing duplicates 157 different unique outcomes  
5 remained. No single outcome was reported across all 138 studies.

6 *Outcome definition variation.* Many outcomes were not clearly defined and different terms  
7 were frequently found for the same concept. For example, shoulder abduction strength was  
8 described in eleven different ways including 'deltoid strength', 'motor function of axillary  
9 nerve', 'motor recovery of shoulder abductors', 'muscle power supraspinatus', 'motor  
10 function of deltoid', 'motor function of supraspinatus'.

11 *Outcome timing variation:* Forty percent of outcomes were measured between one and  
12 three years following intervention. For over 6% of outcomes the timing of the measurement  
13 was not stated. See Figure 2.

14  
15 Place Figure 2 here

16 Figure 2. Outcome measurement timepoints

17

18

19

20

21

22

23

1  
2  
3 1 *Outcome domains:* The 157 different types of outcomes were categorized into four core  
4  
5 2 areas (Physiological and Clinical, Life Impact, Resource Use, Adverse Events/Complications)  
6  
7  
8 3 and 11 domains according to the COMET recommendations,[24]. See supplementary file 6.  
9  
10 4 The core area Physiological/Clinical included three domains: musculoskeletal and connective  
11  
12 5 tissue outcomes, nervous system outcomes and general/symptom outcomes. The core area  
13  
14 6 Life Impact included seven domains: physical functioning, social functioning, role  
15  
16 7 functioning, emotional functioning, global quality of life, perceived health status and  
17  
18 8 delivery of care. The core area Resource Use included one domain: hospital resources. The  
19  
20 9 core area Adverse Events included one domain: adverse events. No outcome could be  
21  
22 10 placed into the core area Death.  
23  
24  
25  
26  
27  
28  
29  
30  
31  
32  
33  
34  
35  
36  
37  
38  
39  
40  
41  
42  
43  
44  
45  
46  
47  
48  
49  
50  
51  
52  
53  
54  
55  
56  
57  
58  
59  
60

12 Tables 2 to 4 summarise the number of unique outcomes within each domain and the  
13 number of studies reporting these outcomes in each core area. The most frequently  
14 reported domains were all in the Physiological/ Clinical core area and included  
15 musculoskeletal and connective tissue (86%), nervous system (33%) and symptoms (38%).  
16 Forty-six studies (33%) reported complications/ adverse events.

1 Table 2. Physiological /Clinical Core Area

| Outcome Domains                       | Number of unique outcomes reported within domain | Examples of unique outcomes                                                                                      | Number of studies reporting outcomes in domain (%) |
|---------------------------------------|--------------------------------------------------|------------------------------------------------------------------------------------------------------------------|----------------------------------------------------|
| Musculoskeletal and connective tissue | 18                                               | Active range of movement, muscle strength, muscle fatigue                                                        | 119/138 (86%)                                      |
| Nervous system                        | 15                                               | Progression of nerve regeneration, ability to feel light touch, ability to feel pain                             | 46/138 (33%)                                       |
| General/ symptoms                     | 23                                               | Pain intensity/relief, pain duration, pain quality, pain when arm exposed to cold, stiffness, sleep, paresthesia | 52/138 (38%)                                       |

2

3

4

5

6

7

8

9

10

11

12

13

14

15

16

17

18

19

1 Table 3. Life Impact Core Area

| <b>Outcome Domains</b>  | <b>Number of unique outcomes reported within domain</b> | <b>Examples of unique outcomes</b>                                         | <b>Number of studies reporting outcomes within domain (%)</b> |
|-------------------------|---------------------------------------------------------|----------------------------------------------------------------------------|---------------------------------------------------------------|
| Physical functioning    | 19                                                      | Reaching, fine hand movement                                               | 35/138 (25%)                                                  |
| Role functioning        | 23                                                      | Return to work, Impact on normal hobbies                                   | 38/138 (27%)                                                  |
| Social functioning      | 7                                                       | Social activities with family                                              | 32/138 (23%)                                                  |
| Emotional functioning   | 13                                                      | Body image, acceptance                                                     | 34/138 (25%)                                                  |
| Global quality of life  | 1                                                       | Quality of life                                                            | 2/138 (1.5%)                                                  |
| Perceived health Status | 1                                                       | Health status rating                                                       | 9/138 (6%)                                                    |
| Delivery of care        | 13                                                      | Patient satisfaction, quality of care, patient preference, time to surgery | 11/138(8%)                                                    |

1 Table 4. Adverse Events and Resource Use Core Areas

| Outcome Domains                     | Number of unique outcomes reported within domain | Examples of unique outcomes       | Number of studies reporting outcomes within domain |
|-------------------------------------|--------------------------------------------------|-----------------------------------|----------------------------------------------------|
| <b>Adverse Events Core Area</b>     |                                                  |                                   |                                                    |
| Donor site morbidity                | 3                                                | Motor weakness, sensory loss      | 24/138(17%)                                        |
| Musculoskeletal                     | 7                                                | Co -contraction, Passive movement | 12/138 (8.7%)                                      |
| Respiratory                         | 4                                                | Pneumothorax                      | 6/138 (4.4%)                                       |
| Vascular                            | 7                                                | Hematoma                          | 7/138 (5.1%)                                       |
| Infection                           | 1                                                | Infection                         | 3/138 (2.2%)                                       |
| General non specified complications | 1                                                | General complications             | 3/138 (2.2%)                                       |
| <b>Resource Use Core Area</b>       |                                                  |                                   |                                                    |
| Hospital resource use               | 1                                                | Operation time                    | 1/138 (.7%)                                        |

2

3

4

5

6

7

8

9

10

11

12

13

14

15

16

17

18

19

20

## 1 Outcome Measurement

2 In addition to extraction of standalone clinician reported and patient reported outcomes  
3 such as muscle power, range or movement or return to work, outcomes were also extracted  
4 from individual items contained in a total of 32 different instruments; PRO measures (n=  
5 22), combined clinician-reported and patient-reported measures (n= 3) and performance  
6 measures (n= 7). See table 5. These measures were reported 98 times in the included  
7 publications. Most outcome measures were used once (n= 22/32, 69%). The most  
8 frequently reported measures were the Disabilities of the Arm Shoulder and Hand  
9 (DASH,[29]) questionnaire (n=28 studies, 29%) and the Visual Analogue Scale (n=20, 20%).  
10 The median number of items per instrument was 15 ranging from one (Visual Analogue  
11 Scale, Numerical Rating Scale and Wong Baker Faces rating scale),[30] to 54,[31]. These  
12 items mapped to 34 different outcome domains.  
13  
14 There was wide variation in the methods used to measure outcomes. This is presented in  
15 supplementary file 7

1 (Measurement instruments mapped to domains). For example; 63 different measurements  
 2 were used to evaluate muscle function, including the British Medical Research Council,[32]  
 3 twelve different modifications of the British Medical Council, Isokinetics, Dynanometry and  
 4 Constant - Murley score,[33]. In addition, it was often not clear which instrument was used  
 5 for measurement of the outcomes. For example, the instrument used to measure active  
 6 range of movement was not reported in 34% of total times (63/ 186) the outcome was  
 7 assessed. Finally with regards to method of measurement 61 studies employed a PRO  
 8 instrument to evaluate the intervention. Prospective and randomized controlled trials were  
 9 more likely to evaluate outcomes with a PRO (58%;15/26) compared to 36% (31/87) of  
 10 retrospective studies.

13 Table 5: Outcome measures used in included studies.

|                      |                                                      | Number of items | Number of scales | Frequency (n=98) |
|----------------------|------------------------------------------------------|-----------------|------------------|------------------|
| PRO Measures         | <b>Upper limb physical function measures (n= 17)</b> |                 |                  |                  |
|                      | Disabilities of Arm Shoulder and Hand                | 38              | 3                | 28               |
|                      | Quick DASH                                           | 19              | 3                | 1                |
|                      | Upper Extremity Functional Index                     | 20              | 0                | 2                |
|                      | American Shoulder and Elbow Score                    | 15              | 0                | 1                |
|                      | Modified American Shoulder and Elbow Score           | 13              | 0                | 1                |
|                      | Simple Shoulder test                                 | 12              | 0                | 1                |
|                      | Michigan Hand Questionnaire                          | 37              | 0                | 1                |
| PRO & ClinRO Measure | University of California Los Angelus shoulder score  | 5               | 0                | 1                |
|                      | Constant- Murley                                     | 5               | 0                | 1                |

|                      |  |                                                                                       |    |   |    |
|----------------------|--|---------------------------------------------------------------------------------------|----|---|----|
|                      |  | MAYO Performance Index                                                                | 4  | 0 | 1  |
| Performance Measures |  | Jebsen Taylor                                                                         | 7  | 0 | 1  |
|                      |  | University of New Brunswick Test of Prosthetic Function for Unilateral Amputees (UNB) | 30 | 3 | 1  |
|                      |  | Upper Limb Module Questionnaire                                                       | 22 | 3 | 1  |
|                      |  | Action Reach Arm Test                                                                 | 19 | 4 | 2  |
|                      |  | Southampton Hand Assessment Procedure                                                 | 26 | 0 | 2  |
|                      |  | Purdue Peg test                                                                       | 3  | 0 | 1  |
|                      |  | Activities Measure for Upper Limb Amputees                                            | 24 | 0 | 1  |
| PRO Measures         |  | <b>Generic questionnaires (n=3)</b>                                                   |    |   |    |
|                      |  | 36 item short form survey (SF36)                                                      | 36 | 8 | 8  |
|                      |  | Patient Specific Functional Score                                                     | 4  | 0 | 2  |
|                      |  | EQ5D-3L                                                                               | 6  | 0 | 1  |
|                      |  | <b>Condition specific questionnaires (n=1)</b>                                        |    |   |    |
|                      |  | Trinity Amputation and Prosthesis scale                                               | 54 | 5 | 1  |
|                      |  | <b>Symptom specific questionnaires (n=10)</b>                                         |    |   |    |
|                      |  | Visual Analogue Scale                                                                 | 1  | 0 | 20 |
|                      |  | Numerical Rating Scale                                                                | 1  | 0 | 6  |
|                      |  | Wong Baker Faces rating scale                                                         | 1  | 0 | 1  |
|                      |  | Brief pain inventory                                                                  | 15 | 6 | 4  |
|                      |  | Neuropathic pain symptom inventory                                                    | 10 | 5 | 1  |
|                      |  | University of Washington Neuropathic score                                            | 10 | 3 | 1  |
|                      |  | McGill Pain Questionnaire                                                             | 28 | 3 | 2  |
|                      |  | McGill Pain Questionnaire SF                                                          | 17 | 3 | 1  |
|                      |  | McGill Pain Questionnaire (Japanese version)                                          | 17 | 3 | 1  |
|                      |  | Self- rating anxiety scale                                                            | 20 | 0 | 1  |
|                      |  | Zung Self rating Depression scale                                                     | 20 | 0 | 1  |

1  
2  
3  
4



## Outcome Reporting Bias

Figure 3. illustrates the reporting status of outcomes (n=173) across the included prospective case series, cohort and randomized controlled studies (n=26). None of the studies were prospectively registered. Fewer than one third of the outcomes in the prospective case series and cohort studies and half of outcomes in randomized controlled studies were “completely” reported.

Place Figure 3 here.

Figure 3. Cumulative bar chart showing number of outcomes within each reporting bias category across study types.

## DISCUSSION

This systematic review aimed to identify what outcome domains have been reported in studies evaluating interventions for TBPI, examine outcome definitions and timepoints and identify the instruments used to assess outcomes. We found a wide variation in reported outcomes, timing of outcomes and outcome instruments used. Furthermore, a lack of standardized definition for commonly reported outcomes was observed. This heterogeneity in outcome reporting across studies hinders evidence synthesis and results in research waste,[34].

The most commonly reported core area was Physiological/ Clinical including musculoskeletal, nervous system and symptom domains. Eighty-six percent of studies reported musculoskeletal outcomes. However, there were 21 different outcomes reported in this category making comparison between studies difficult. Furthermore, the diversity of measures used to assess the outcomes increases the difficulty with synthesis. For example, muscle function/ strength was assessed using 59 different measures, whilst 10 studies did not report what measure they used. To compound this muscle strength was assessed by both physical examination by a clinician (86%) and also by asking the patient(10%).

Only 44% of studies (61/138) evaluated PROs and within these studies there was significant heterogeneity in the measurement instrument used. Twenty-five different instruments were used with 17 only ever used once. The DASH was the most common instrument employed, in almost half the studies evaluating a PRO. The PRO instruments also varied greatly in terms of content with some as simple as a single item whilst others included up to 54 items. Over 408 individual questionnaire items were evident from the 25 PRO

1 instruments mapping to 34 different outcomes domains. This highlighted a lack of  
2 consistency with no domain being measured by all PRO instruments. None of the included  
3 PRO assessments were designed specifically for individuals with a TBPI. Although this may  
4 be beneficial in terms of comparison with other conditions, such instruments may not be  
5 sensitive to issues of importance to patients with TBPI. Finally, it was evident that  
6 prospective studies and randomized controlled trials were more likely to use patient  
7 reported outcomes to evaluate interventions. This may correspond with the higher  
8 methodological rigour associated with these study designs. However the majority of studies  
9 evaluating interventions in TBPI were retrospective (63%). These issues combined pose  
10 major questions regarding the clinical interpretation of results from TBPI studies.

11  
12  
13 It is clear that that individuals with a TBPI suffer significant emotional and psychosocial  
14 issues,[1,35]. However such issues were infrequently and inconsistently measured within  
15 this review. Only two studies evaluated Quality of Life [36,37] . Similarly, physical, role and  
16 social functioning outcomes were reported in 25%, 27% and 23% of studies respectively.  
17 This relates strongly to the use of the DASH within the studies. Indeed, emotional  
18 functioning was reported in 34 studies, 28 of these studies used the DASH which has one  
19 item on confidence and capability mapping to this domain. If the DASH was excluded, only  
20 six studies would assess outcomes within the emotional functioning domain. This is  
21 surprising considering the existing literature which evidences the complex emotional and  
22 psychological factors, individuals face when adjusting to their injury,[1,38].

23

1  
2  
3 1 Complications/adverse events were reported in one third of studies. Documentation of  
4  
5 2 complications is crucial to improve patient care and gather data for benchmarking. In 1992,  
6  
7 3 the Clavien-Dindo classification,[39] was introduced to assist with classification of  
8  
9 4 complications to enable comparison between studies,[39]. However, within the adverse  
10  
11 5 events outcomes identified in this review there was heterogeneity. Of the 37 verbatim  
12  
13 6 outcomes reported within the donor morbidity (motor) outcome 19 did not define how this  
14  
15 7 was assessed.  
16  
17  
18  
19  
20  
21  
22

### 23 9 Outcome Reporting Bias

24  
25 10 Only four studies included in this review were randomized controlled trials [40,41,42,43].  
26  
27 11 However despite prospective trial registration on a public registry being a condition of  
28  
29 12 publication [44] none of the randomized trials on TBPI were registered. We also found  
30  
31 13 marked selective outcome reporting in the included prospective and randomized TBPI  
32  
33 14 studies. Most outcomes were only partially reported, frequently lacking specific detail about  
34  
35 15 the outcome result or time of measurement, omitting certain outcome results or lacking  
36  
37 16 detail needed for meta-analysis. This outcome reporting bias identified in current TBPI  
38  
39 17 literature threatens the validity of the evidence based practice in TBPI because it potentially  
40  
41 18 overestimates the effect of treatments or distorts results of studies. This contributes to  
42  
43 19 research waste and critically delays advancement of care for patients.  
44  
45  
46  
47  
48  
49  
50  
51

52 21 There are some limitations in this review. We excluded outcomes from older studies to  
53  
54 22 ensure we identified outcomes relevant to contemporary TBPI care. Detailed risk of bias  
55  
56 23 assessment was not undertaken, however the review was designed to identify the breadth  
57  
58 24 of reporting in the literature and not to examine the effectiveness of interventions. The  
59  
60

1 strengths of this review are that the protocol and the data extraction form were pre-  
2 specified, prospectively registered and the literature search systematic. To account for  
3 multidisciplinary perspectives, researchers and clinicians were involved in categorizing  
4 outcomes into domains. It is the first review to detail the extent of outcome heterogeneity  
5 in TBPI research using a systematic method. International and non-English publications  
6 were included to reduce the risk of selection bias.

7  
8  
9 Variation in definitions and measurement of outcomes has been found within other areas of  
10 healthcare. Outcome heterogeneity is found in the reporting of outcomes relating to burn  
11 care,[45] breast reconstruction,[46] and spinal cord injury,[47] amongst others. A recent  
12 review of outcome reporting within burns illustrated wound healing was defined in 166  
13 different ways across 147 studies,[45]. A solution to the variation in outcome reporting  
14 across studies in TBPI is the development of a COS,[20]. This has been shown to improve  
15 consistency of outcome reporting,[19,48]. Development of a COS in TBPI would not restrict  
16 the range of outcomes that can be measured. Researchers and clinicians would still be free  
17 to select additional outcomes but the inclusion of such a COS would facilitate synthesis of  
18 evidence,[49,50]. Whilst work has begun in obstetric brachial plexus injuries to develop a  
19 minimum data set[51], there is no COS for TBPI.

20 Considerable work has been done by the Core Outcome Measures in Effectiveness Trials  
21 (COMET) initiative through dissemination of resources for COS development and support for  
22 methodological development. COMET recommends a five step process to develop a COS:  
23 define the scope, assess the need, develop the protocol, determine what to measure and  
24 determine how to measure,[52]. This systematic review addresses these first two steps for

1 the development of the COS in TBPI care. This review has shown the majority of TBPI studies  
2 use only clinician reported outcomes to evaluate interventions. However they do not  
3 adequately capture patients' health related quality of life,[53] and may underestimate the  
4 impact of a condition,[54]. Concurrent qualitative work to identify outcomes which are  
5 important to individuals with a TBPI has been completed by this group. The next stage  
6 involves integration of all potential outcomes from this review and the qualitative work into  
7 a long list of domains. Healthcare professionals and patients will be invited to prioritize  
8 these outcomes during a three round international online Delphi process and consensus  
9 meeting. This will strengthen the case for uptake of a COS for TBPI as it represents patients'  
10 and clinicians' perspectives on what outcomes are important. The final stage will map  
11 existing validated measures to the outcome domains in the final COS. A future study will  
12 evaluate the psychometric properties of those mapped measurement instruments and  
13 identify where new measures need to be developed.

## CONCLUSION

1  
2  
3  
4  
5  
6 2 This systematic review has shown that outcome reporting in TBPI care is heterogenous and  
7  
8 3 impairment focused with a lack of standardized definitions for commonly reported  
9  
10 4 outcomes. This makes it difficult to compare and combine data from studies to inform  
11  
12 5 decision making in clinical practice. The measurement instruments used in the studies were  
13  
14 6 also often not clear, particularly when range of movement was assessed. In future studies,  
15  
16 7 authors need to be clearer with descriptions of outcomes assessed and how they were  
17  
18 8 measured. Less than half the studies in this review evaluated outcomes using PRO  
19  
20 9 measures. Given that TBPI has a significant impact on health-related quality of life, it is  
21  
22 10 recommended that authors of future studies include PROs in future studies. We have  
23  
24 11 identified a list of potentially relevant outcomes and categorized these into a clear  
25  
26 12 taxonomy. This will inform the next stage of developing a COS for TBPI where patients,  
27  
28 13 surgeons and therapists will be involved in a consensus process to decide the final outcomes  
29  
30 14 included in a COS for TBPI.  
31  
32  
33  
34  
35  
36  
37  
38  
39  
40  
41  
42  
43  
44

## Acknowledgements

45  
46  
47  
48 19 We would like to thank Colin Shirley for his assistance and guidance categorising  
49  
50 20 neurophysiological outcomes  
51  
52  
53  
54  
55  
56  
57  
58  
59  
60

1

## 2 **Competing Interests**

3 Conflicting interests: CM, CJH, JC, DMP and JOS declare no potential conflicts of interest  
4 with respect to the research, authorship and publication of this article. DGK reports grants  
5 from NIHR, grants from Innovate UK, grants from NIHR Birmingham Biomedical Research  
6 Centre, grants from NIHR SRMRC at the University of Birmingham and University Hospitals  
7 Birmingham NHS Foundation Trust, personal fees from Merck, personal fees from GSK,  
8 grants from Macmillan Cancer Support, grants from Kidney research UK, outside the  
9 submitted work; .

10

## 11 **Funding**

12 The work was supported by the National Institute of Health Research [grant number ICA-  
13 CDRF-2017-03-039]

14

15

## 16 **Ethical approval**

17 Ethical approval was not sought for the present study because it was a systematic review  
18 and did not involve human or animal subjects.

19

## 20 **Informed consent**

21 Informed consent was not sought for the present study because it was a systematic review  
22 and did not involve human participation



1  
2  
3 **1 Data availability**  
4  
5

6 2 All data relevant to the study are included in the article or uploaded as supplementary  
7  
8  
9 3 information.  
10

11  
12 4  
13  
14  
15 **5 Contributorship**  
16

17  
18 6 CM, CJH and JC conceived and designed the review. CM and JOS reviewed the titles,  
19  
20 7 abstracts and full text papers for eligibility. Authors resolved disagreements by discussion or  
21  
22 8 where necessary CJH and DMP offered their view. CM and JOS were responsible for  
23  
24 9 extracting data and data extraction was verified by CJH. CM and JOS independently  
25  
26 10 reviewed outcome reporting bias. CM, CJH and JC categorised outcomes. Categorisation was  
27  
28 11 reviewed and edited by DMP and DK. CM prepared the manuscript. CJH,JC, DMP, DK and  
29  
30 12 JOS reviewed and edited the manuscript.  
31  
32  
33  
34  
35  
36  
37  
38  
39  
40  
41  
42  
43  
44  
45  
46  
47  
48  
49  
50  
51  
52  
53  
54  
55  
56  
57  
58  
59  
60

## References

- 1  
2  
3  
4  
5  
6  
7  
8 [1] Brito S, White J, Thomacos N, et al. The lived experience following free functioning  
9  
10 muscle transfer for management of pan-brachial plexus injury: reflections from a  
11  
12 long-term follow-up study. *Disabil Rehabil* 2019;1:1–9.
- 13  
14  
15 [2] Morris M, Daluiski A, Dy C. A thematic analysis of online discussion boards for  
16  
17 brachial plexus injury. *J Hand Surg AM* 2016;41(8):813-8.
- 18  
19  
20 [3] Kaiser R, Waldauf P, Ullas G, et al. Epidemiology, etiology, and types of severe adult  
21  
22 brachial plexus injuries requiring surgical repair: systematic review and meta-analysis.  
23  
24 *Neurosurg Rev* 2020;43(2):443-452.
- 25  
26  
27 [4] Moran CG, Lecky F, Bouamra O, et al. Changing the system - major trauma patients  
28  
29 and their outcomes in the NHS (England) 2008-17. *EClinicalMedicine* 2018;13–21.
- 30  
31  
32 [5] Dy CJ, Peacock K, Olsen MA, et al. Incidence of surgically treated brachial plexus injury  
33  
34 in privately insured adults under 65 years of age in the USA. *Hosp Spec Surg J*  
35  
36 2020;online.
- 37  
38  
39 [6] Midha R. Epidemiology of brachial plexus injuries in a multitrauma population.  
40  
41  
42 *Neurosurgery* 1997;40:1182–8
- 43  
44  
45 [7] Felici N, Zaami S, Ciancolini G, et al. Cost analysis of brachial plexus injuries: Variability  
46  
47 of compensation by insurance companies before and after surgery. *Handchir*  
48  
49 *Mikrochir Plast Chir* 2014;46:85–9.
- 50  
51  
52 [8] Hong TS, Tian A, Sachar R, et al. Indirect cost of traumatic brachial plexus injuries in  
53  
54 the United States. *J Bone Joint Surg Am* 2019;101:e80.
- 55  
56  
57 [9] Bhandari PS, Maurya S. Recent advances in the management of brachial plexus  
58  
59 injuries. *Indian J Plast Surg* 2014;47:191–8.
- 60

- 1  
2  
3 1 [10] Kubota S, Hara Y, Shimizu Y, et al. A newly developed upper limb single-joint HAL in a  
4  
5 2 patient with elbow flexion reconstruction after traumatic brachial plexus injury: A  
6  
7 3 case report. *Interdiscip Neurosurg Adv Tech Case Manag* 2017;10:66–8.  
8  
9  
10 4 [11] Dickinson HD. Evidence-based decision-making: an argumentative approach. *Int J*  
11  
12 5 *Med Inform* 1998;51:71–81.  
13  
14  
15 6 [12] Sackett DL, Rosenberg WM, Gray JA, et al . Evidence based medicine: what it is and  
16  
17 7 what it isn't. *BMJ* 1996;312:71–2.  
18  
19  
20 8 [13] Ayhan E, Soldado F, Fontecha CG, et al. Elbow flexion reconstruction with nerve  
21  
22 9 transfer or grafting in patients with brachial plexus injuries: A systematic review and  
23  
24 10 comparison study. *Microsurgery* 2020;40:79–86.  
25  
26  
27 11 [14] Donnelly MR, Rezzadeh KT, Vieira D et al. Is one nerve transfer enough? A systematic  
28  
29 12 review and pooled analysis comparing ulnar fascicular nerve transfer and double  
30  
31 13 ulnar and median fascicular nerve transfer for restoration of elbow flexion after  
32  
33 14 traumatic brachial plexus injury. *Microsurgery* 2020;40:361–9.  
34  
35  
36 15 [15] Dy CJ, Garg R, Lee SK, et al. A systematic review of outcomes reporting for brachial  
37  
38 16 plexus reconstruction. *J Hand Surg Am* 2015;40:308–13.  
39  
40  
41 17 [16] Hill B, Williams G, Olver J, et al. Letter regarding outcome reporting for brachial  
42  
43 18 plexus reconstruction. *J Hand Surg Am* 2015;40:1504.  
44  
45  
46 19 [17] Gargon E, Gurung B, Medley N, et al. Choosing important health outcomes for  
47  
48 20 comparative effectiveness research: a systematic review. *PLoS One* 2014;17(7):A435  
49  
50  
51 21 [18] Williamson P, Altman D, Blazeby J et al. Driving up the quality and relevance of  
52  
53 22 research through the use of agreed core outcomes. *J Health Serv Res Policy*  
54  
55 23 2012;17:1–2.  
56  
57  
58  
59 24  
60

- 1  
2  
3 1 [19] Kirkham JJ, Bracken M, Hind L, et al. Industry funding was associated with increased  
4  
5 use of core outcome sets. *J Clin Epidemiol* 2019;115:90–7.  
6 2  
7  
8 3 [20] Williamson PR, Altman DG, Blazeby JM et al. The COMET (Core Outcome Measures in  
9  
10 Effectiveness Trials) Initiative. *Trials* 2011;12:A70.  
11 4  
12  
13 5 [21] Higgins J, Green S. Cochrane Handbook for Systematic Reviews of Interventions  
14  
15 Version (updated March 2011). version 5. 2011.  
16 6  
17  
18 7 [22] Shamseer L, Moher D, Clarke M, et al. Preferred reporting items for systematic review  
19  
20 and meta-analysis protocols (PRISMA-P) 2015: elaboration and explanation. *BMJ*  
21 8  
22 2015;349:g7647.  
23 9  
24  
25 10 [23] Kirkham JJ, MDwan K, Altman DG et al. The impact of outcome reporting bias in  
26  
27 randomised controlled trials on a cohort of systematic reviews. *BMJ* 2010;340:637-  
28 11  
29 40.  
30 12  
31  
32 13 [24] Deshmukh SR, Mousoulis C, Marson BA et al. Developing a core outcome set for hand  
33  
34 fractures and joint injuries in adults: a systematic review. *Journal of Hand*  
35 14  
36 *Surgery(Eur)* 2021; 46(5):488-495.  
37 15  
38  
39 16 [25] Richardson E, Burnell J, Adams HR, et al. Developing and implementing performance  
40  
41 outcome assessments: evidentiary, methodologic, and operational considerations.  
42 17  
43 *Ther Innov Regul Sci.*2019;53(1):146-153.  
44 18  
45  
46 19 [26] Cieza A, Geyh S, Chatterji S, et al. ICF linking rules: an update based on lessons  
47  
48 learned. *J Rehabil Med* 2005;37:212–8.  
49 20  
50  
51 21 [27] Dodd S, Clarke M, Becker L, et al. A taxonomy has been developed for outcomes in  
52  
53 medical research to help improve knowledge discovery. *J Clin Epidemiol* 2018;96:84–  
54 22  
55 92.  
56 23  
57  
58 24 [28] Young AE, Brookes ST, Avery KNL, et al. A systematic review of core outcome set  
59  
60

- 1  
2  
3 1 development studies demonstrates difficulties in defining unique outcomes. *J Clin*  
4  
5  
6 2 *Epidemiol* 2019;115:14–24.
- 7  
8 3 [29] Hudak PL, Amadio PC, Bombardier C, et al. Development of an upper extremity  
9  
10 4 outcome measure: The DASH (disabilities of the arm, shoulder, and head). *Am J Ind*  
11  
12 5 *Med* 1996;29:602–8.
- 13  
14  
15 6 [30] Baker C, Wong D. Q.U.E.S.T: a process of pain assessment in children (continuing  
16  
17 7 education credit). *Orthop Nurs* 1987;6:11–21.
- 18  
19  
20 8 [31] Gallagher P, MacLachlan M. Development and psychometric evaluation of the trinity  
21  
22 9 amputation and prosthesis experience scales (TAPES). *Rehabil Psychol* 2000;45:130–  
23  
24 10 54.
- 25  
26  
27 11 [32] Medical Research Council. Aids to the investigation of the peripheral nervous system.  
28  
29 12 London: Her Majesty's stationary office; 1943.
- 30  
31  
32 13 [33] Constant CR, Murley AH (1987) A clinical method of functional assessment of the  
33  
34 14 shoulder. *Clinical Orthopaedics & Related Research* 1987;214:160-164
- 35  
36  
37 15 [34] Chalmers I, Glasziou P. Avoidable waste in the production and reporting of research  
38  
39 16 evidence. *Lancet* 2009;374:86–9.
- 40  
41  
42 17 [35] McDonald J, Pettigrew J. Traumatic brachial plexus injury: the lived experience. *British*  
43  
44 18 *Journal of Occupational Therapy* 2014;77(3):147-154.
- 45  
46  
47 19 [36] Kim JH, Shin SH, Lee YR, et al. Ultrasound-guided peripheral nerve stimulation for  
48  
49 20 neuropathic pain after brachial plexus injury: two case reports. *J Anesth* 2017;31:453–  
50  
51 21 7.
- 52  
53  
54 22 [37] Cole T, Nicks R, Ferris S et al. Outcomes after occupational therapy intervention for  
55  
56 23 traumatic brachial plexus injury: A prospective longitudinal cohort study. *Journal of*  
57  
58 24 *Hand Therapy* 2020;33:528-539

- 1  
2  
3 1  
4  
5  
6 2 [38] Miller C, Peek AL, Power D, et al. Psychological consequences of traumatic upper limb  
7  
8 3 peripheral nerve injury: A systematic review. *Hand Ther* 2017;22:35–45.  
9  
10 4 [39] Clavien P, Sanabria J, Strasberg S. Proposed classification of complications of surgery  
11  
12 5 with examples of utility in cholecystectomy. *Surgery* 1992;111(5):518-26  
13  
14  
15 6 [40] Razak I, Chung TY, Ahmad S et al. A comparative study of two modalities in pain  
16  
17 7 management of patients presenting with chronic brachial neuralgia. *Journal of*  
18  
19 8 *Alternative and Complementary Medicine* 2019; 1-7  
20  
21  
22 9 [41] Ferreira CM, de Carvalho CD, Gomes R et al. Transcranial direct current stimulation  
23  
24 10 and mirror therapy for neuropathic pain after brachial plexus avulsion: A randomised  
25  
26 11 double-blind, controlled pilot study. *Frontiers in Neurology* 2020; 11:1-10  
27  
28  
29 12 [42] Martins RS, Siqueira MG, Heise CO et al. A prospective study comparing single and  
30  
31 13 double fascicular transfer to restore elbow flexion after brachial plexus injury.  
32  
33 14 *Neurosurgery* 2013;72:709-715  
34  
35  
36 15 [43] Tu YK, Tsai YJ, Chang CH et al. Surgical treatment for total root avulsion type brachial  
37  
38 16 plexus injuries by neurotization: a prospective comparison study between total and  
39  
40 17 hemicontralateral C7 nerve root transfer. *Microsurgery* 2014; 34:91-101  
41  
42  
43 18 [44] Angelis CD, Drazen JM, Frizelle FA et al. Clinical trial registration: a statement from the  
44  
45 19 international committee of medical journal editors. *The New England Journal of*  
46  
47 20 *Medicine* 2004; 351:1250-1251  
48  
49  
50 21 [45] Young AE, Davies A, Bland S et al. Systematic review of clinical outcome reporting in  
51  
52 22 randomised controlled trials of burn care. *BMJ Open* 2019;15;9(2):e025135  
53  
54  
55 23 [46] Potter S, Brigic A, Whiting PF, et al. Reporting clinical outcomes of breast  
56  
57 24 reconstruction: a systematic review. *J Natl Cancer Inst* 2011;103:31–46.  
58  
59  
60

- 1  
2  
3 1 [47] Watzlawick R, Antonic A, Sena ES, et al. Outcome heterogeneity and bias in acute  
4 experimental spinal cord injury A meta-analysis. *Neurology* 2019;2;93(1):e40-e51  
5  
6 2  
7  
8 3 [48] Bautista-Molano W, Navarro-Compán V, Landewé RBM, et al. How well are the  
9  
10 4 ASAS/OMERACT core outcome sets for ankylosing spondylitis implemented in  
11  
12 5 randomized clinical trials? A systematic literature review. *Clin Rheumatol*  
13  
14 6 2014;33:1313–22.  
15  
16  
17 7 [49] Clarke M, Williamson PR. Core outcome sets and systematic reviews. *Syst Rev*  
18  
19 8 2016;5:11.  
20  
21  
22 9 [50] Clarke M. Standardising outcomes for clinical trials and systematic reviews. *Trials*  
23  
24 10 2007;8:39.  
25  
26  
27 11 [51] Pondaag W, Malessy MJA. Outcome assessment for Brachial Plexus birth injury.  
28  
29 12 Results from the iPluto world-wide consensus survey. *J Orthop Res* 2018;36:2533–41.  
30  
31  
32 13 [52] Williamson PR, Altman DG, Bagley H, et al. The COMET Handbook: version 1.0. *Trials*  
33  
34 14 2017;18:280.  
35  
36  
37 15 [53] Pakhomov S, Jacobsen SJ, Chute CG, et al. Agreement between patient-reported  
38  
39 16 symptoms and their documentation in the medical record. *Am J Manag Care*  
40  
41 17 2008;14:530–9.  
42  
43  
44 18 [54] Turner GM, Slade A, Retzer A, et al. An Introduction to Patient Reported Outcome  
45  
46 19 Measures (PROMs) in Trauma. *J Trauma Acute Care Surg* 2019;86(2):314-320  
47  
48  
49  
50  
51  
52  
53  
54  
55  
56

57 25 Figure 2 Legends  
58 26  
59 27

60 27 mths, months; NS, not stated; yrs, years.

1  
2  
3  
4  
5  
6  
7  
8  
9  
10  
11  
12  
13  
14  
15  
16  
17  
18  
19  
20  
21  
22  
23  
24  
25  
26  
27  
28  
29  
30  
31  
32  
33  
34  
35  
36  
37  
38  
39  
40  
41  
42  
43  
44  
45  
46  
47  
48  
49  
50  
51  
52  
53  
54  
55  
56  
57  
58  
59  
60

1  
2  
3  
4  
5

For peer review only



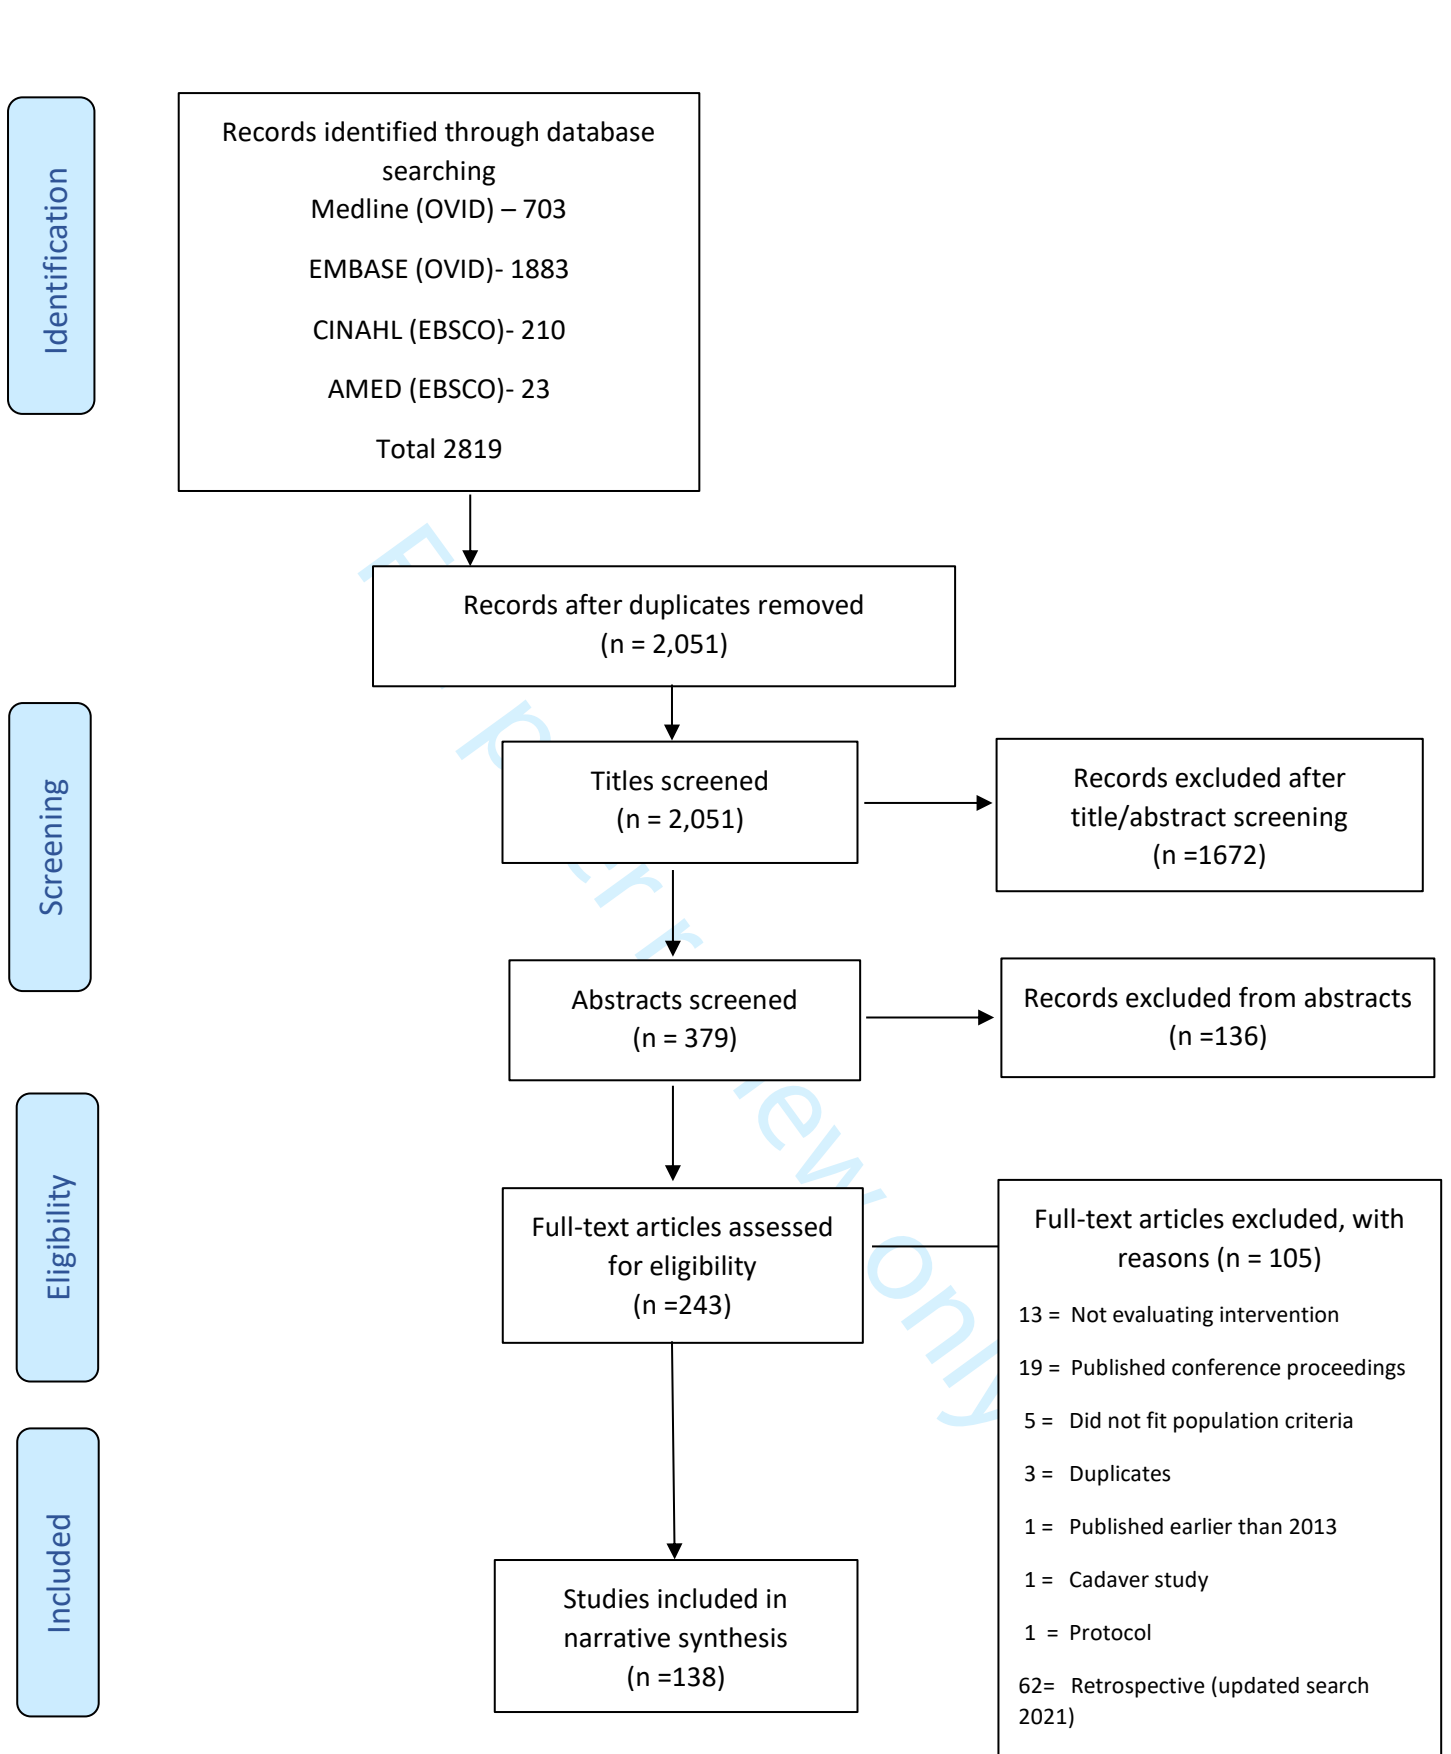

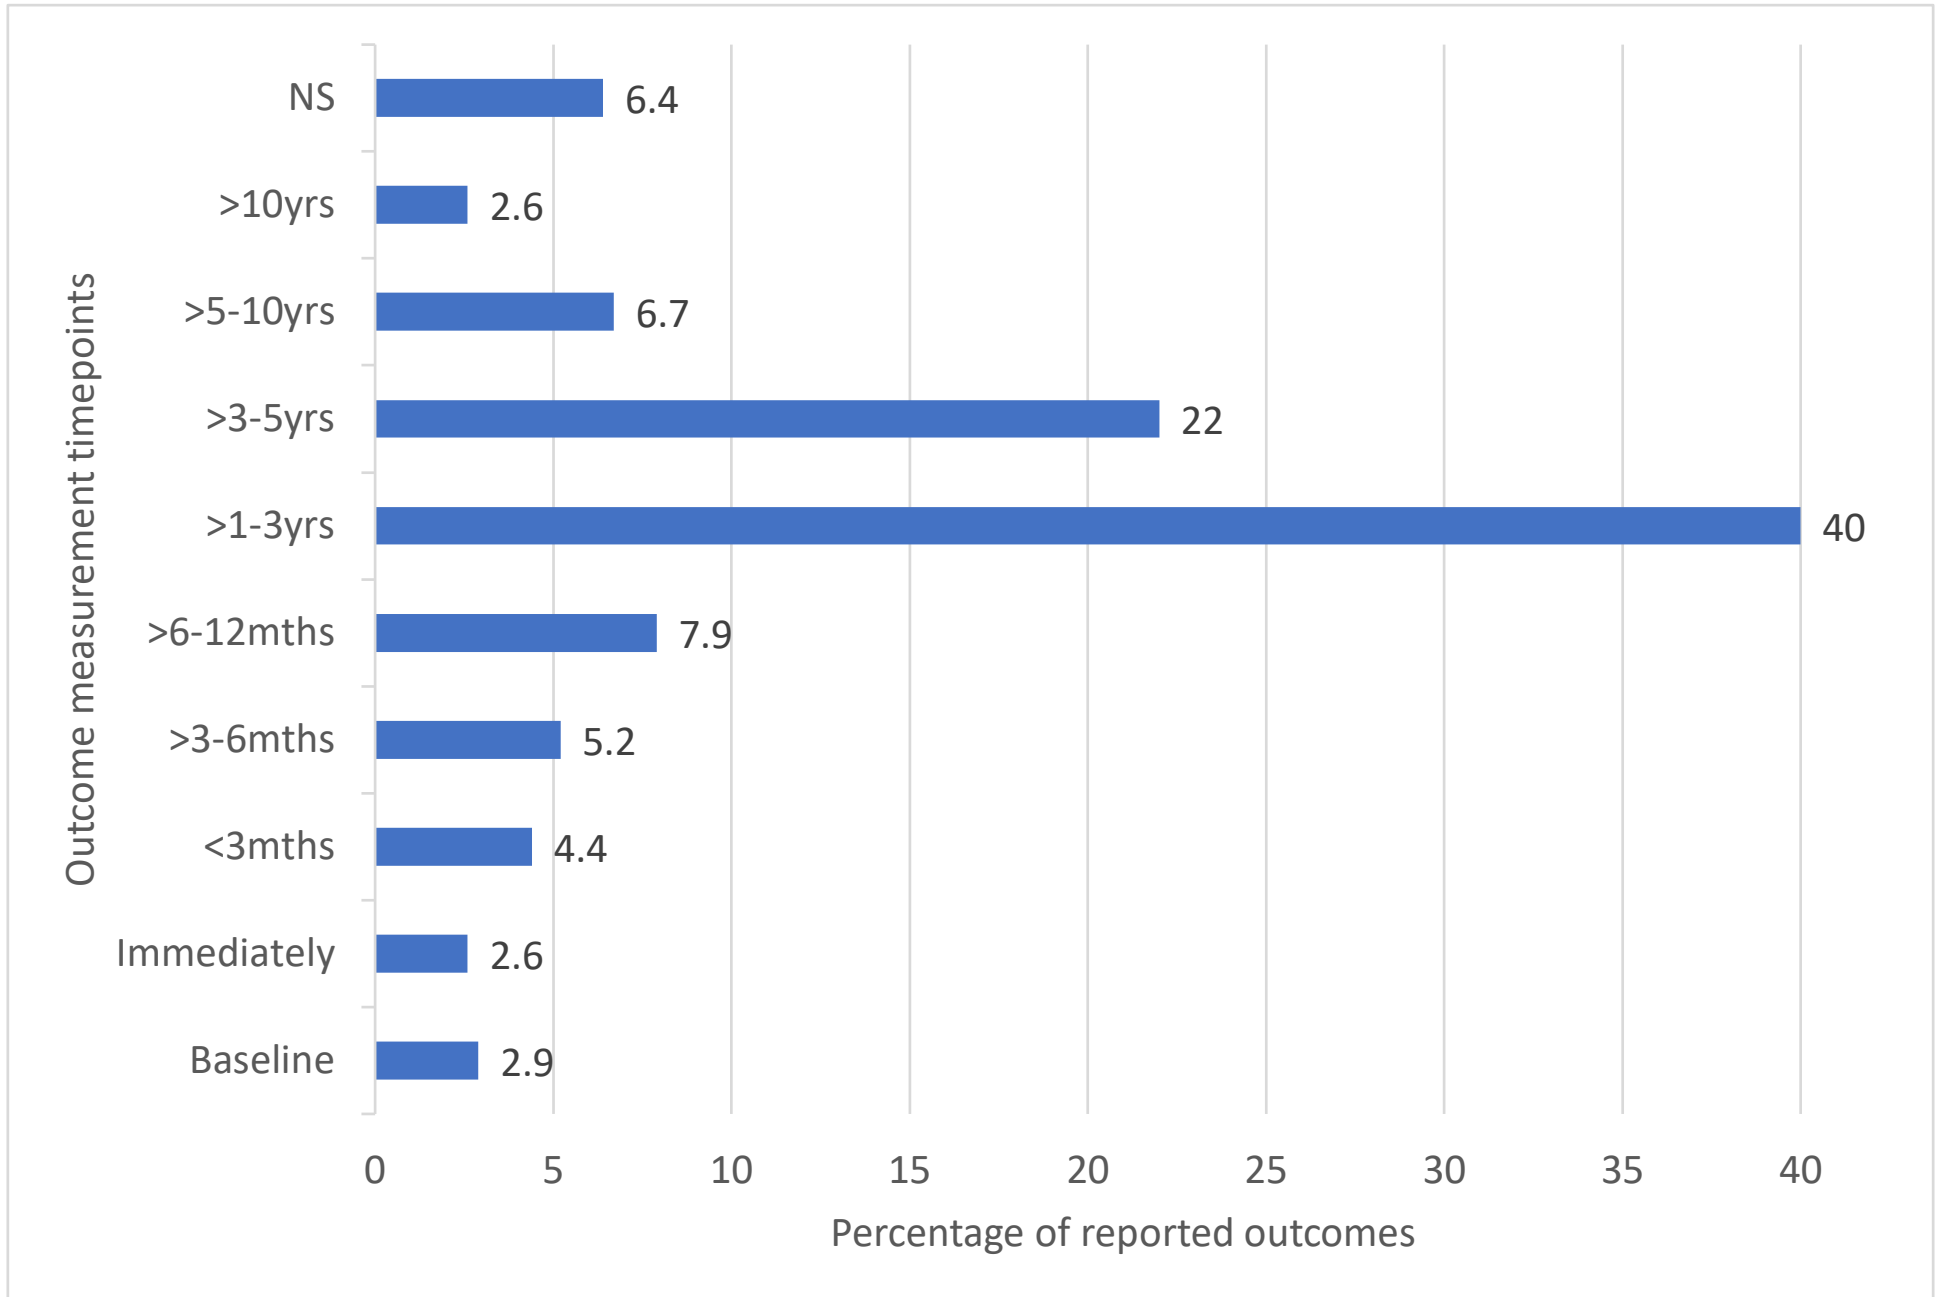

1  
2  
3  
4  
5  
6  
7  
8  
9  
10  
11  
12  
13  
14  
15  
16  
17  
18  
19  
20  
21  
22  
23  
24  
25  
26  
27  
28  
29  
30  
31  
32  
33  
34  
35  
36  
37  
38  
39  
40  
41  
42  
43  
44  
45  
46

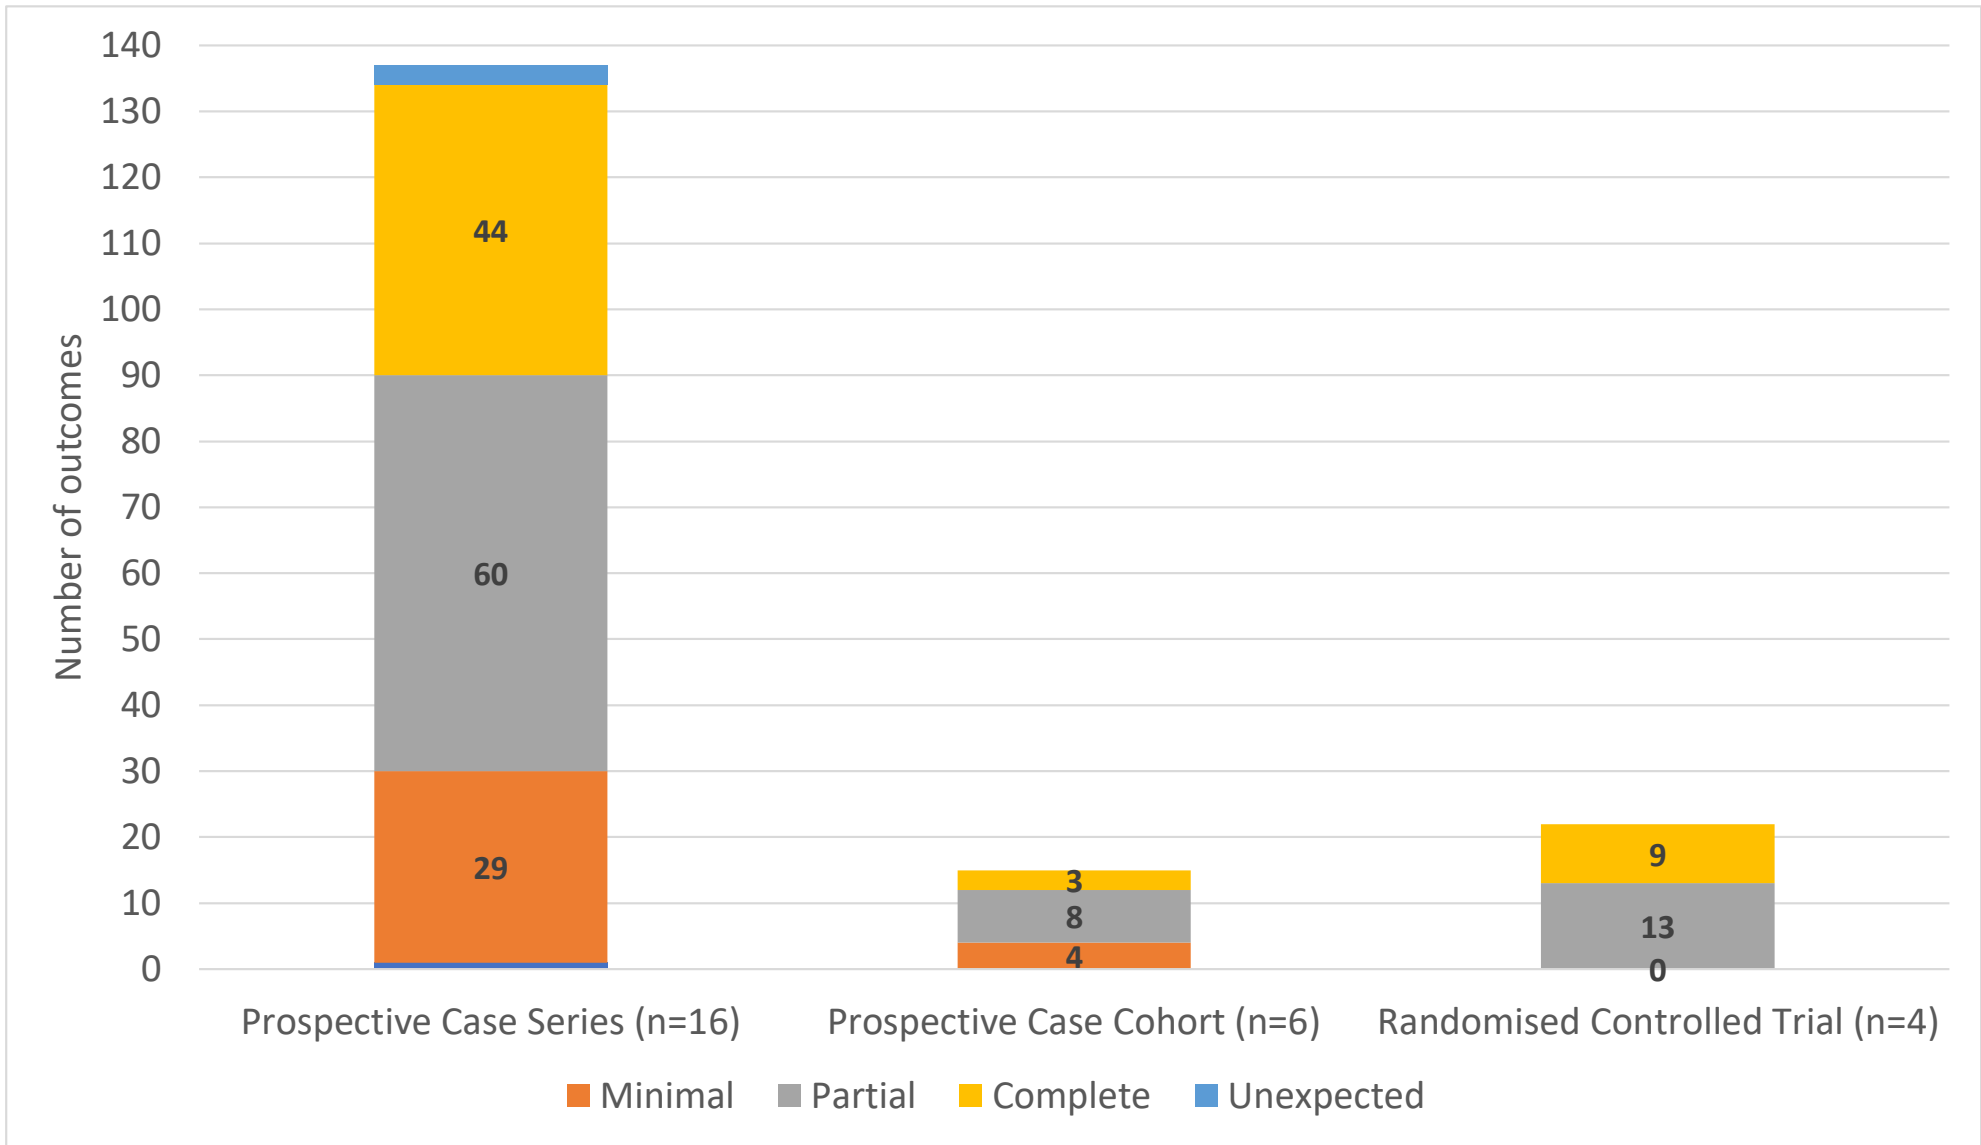

## Developing a core outcome set for traumatic brachial plexus injuries: a systematic review of outcomes

### Supplementary file 1. Deviations from study protocol

| Protocol method                                                                                     | Deviation from protocol method with justification                                                                                                                                                                                                                                                                                                                        |
|-----------------------------------------------------------------------------------------------------|--------------------------------------------------------------------------------------------------------------------------------------------------------------------------------------------------------------------------------------------------------------------------------------------------------------------------------------------------------------------------|
| We planned to hand search Journal of Hand Surgery (Eur) and The Journal of Hand Surgery (American). | We did not hand search these Journals as they were all indexed for MEDLINE.                                                                                                                                                                                                                                                                                              |
| We planned to include studies with participants aged 18 and over within the review.                 | We reduced the age of include participants to 16 or over as many studies included older teenagers with adults in their studies. On discussion with the research team we concluded that there was no difference between treatment of those aged 16 and over versus aged 18. If we excluded these studies many outcomes used across these age ranges would have been lost. |
| One search date was originally proposed in the study protocol                                       | We updated the search in May 2021, including prospective and randomized controlled trials to ensure that the outcomes identified and reported in the publication reflected current outcomes in the literature and to ensure that no outcomes were omitted.                                                                                                               |
| No quality assessment was proposed in the original study protocol                                   | Outcome reporting bias was assessed in the included prospective and randomized controlled trials. This was included as it was thought this could improve understanding on what outcomes authors prioritise.                                                                                                                                                              |

Supplementary file 2. Search strategy systematic review outcome reporting traumatic brachial plexus injuries

Search strategy 10/09/2018 COMBINE systematic review (reran 07 May 2021)

MEDLINE (OVID)

- 1.(brachial plexus adj3 injur\*).mp. [mp=title, abstract, original title, name of substance word, subject heading word, floating sub-heading word, keyword heading word, protocol supplementary concept word, rare disease supplementary concept word, unique identifier, synonyms]
- 2 (brachial plexus adj3 pals\*).mp. [mp=title, abstract, original title, name of substance word, subject heading word, floating sub-heading word, keyword heading word, protocol supplementary concept word, rare disease supplementary concept word, unique identifier, synonyms]
- 3 (brachial plexus adj3 lesion\*).mp. [mp=title, abstract, original title, name of substance word, subject heading word, floating sub-heading word, keyword heading word, protocol supplementary concept word, rare disease supplementary concept word, unique identifier, synonyms]
- 4 brachial plexopath\*.mp. [mp=title, abstract, original title, name of substance word, subject heading word, floating sub-heading word, keyword heading word, protocol supplementary concept word, rare disease supplementary concept word, unique identifier, synonyms]
- 5 (brachial plexus adj3 traction\*).mp. [mp=title, abstract, original title, name of substance word, subject heading word, floating sub-heading word, keyword heading word, protocol supplementary concept word, rare disease supplementary concept word, unique identifier, synonyms]
- 6 (brachial plexus adj3 avulsion\*).mp. [mp=title, abstract, original title, name of substance word, subject heading word, floating sub-heading word, keyword heading word, protocol supplementary concept word, rare disease supplementary concept word, unique identifier, synonyms]
- 7 Brachial Plexus/in, su, tr [Injuries, Surgery, Transplantation]
- 8 1 or 2 or 3 or 4 or 5 or 6 or 7
- 9 limit 8 to (humans and "all adult (19 plus years)")
10. limit 9 to yr="2013 -Current"

Supplementary file 2. Search strategy systematic review outcome reporting traumatic brachial plexus injuries

1  
2  
3  
4  
5  
6  
7  
8  
9  
10  
11  
12  
13  
14  
15  
16  
17  
18  
19  
20  
21  
22  
23  
24  
25  
26  
27  
28  
29  
30  
31  
32  
33  
34  
35  
36  
37  
38  
39  
40  
41  
42  
43  
44  
45  
46  
47  
48  
49  
50  
51  
52  
53  
54  
55  
56  
57  
58  
59  
60

For peer review only

Supplementary file 3. Outcome reporting bias assessment instrument

Outcome Reporting Bias assessment instrument (adapted from Deshmukh et al 2021)

| Study ID | Author | Registered | No clear reporting of outcome through description/table/figure | Outcome only by summary comment ( e.g. there was no significant difference), no numerical values provided, lack of information so that reporting not meaningful ( outcomes but no timepoints) | Outcome reported but not at all timepoints; lacks detail to be included in review | Outcome reported at all time points ( methods, Results) | Outcome not specified in registration or prior to results |
|----------|--------|------------|----------------------------------------------------------------|-----------------------------------------------------------------------------------------------------------------------------------------------------------------------------------------------|-----------------------------------------------------------------------------------|---------------------------------------------------------|-----------------------------------------------------------|
|          |        |            | <b>NOT DONE</b>                                                | <b>MIMIMAL</b>                                                                                                                                                                                | <b>PARTIAL</b>                                                                    | <b>COMPLETE</b>                                         | <b>UNEXPECTED</b>                                         |
|          |        |            |                                                                |                                                                                                                                                                                               |                                                                                   |                                                         |                                                           |
|          |        |            |                                                                |                                                                                                                                                                                               |                                                                                   |                                                         |                                                           |
|          |        |            |                                                                |                                                                                                                                                                                               |                                                                                   |                                                         |                                                           |
|          |        |            |                                                                |                                                                                                                                                                                               |                                                                                   |                                                         |                                                           |
|          |        |            |                                                                |                                                                                                                                                                                               |                                                                                   |                                                         |                                                           |
|          |        |            |                                                                |                                                                                                                                                                                               |                                                                                   |                                                         |                                                           |
|          |        |            |                                                                |                                                                                                                                                                                               |                                                                                   |                                                         |                                                           |
|          |        |            |                                                                |                                                                                                                                                                                               |                                                                                   |                                                         |                                                           |
|          |        |            |                                                                |                                                                                                                                                                                               |                                                                                   |                                                         |                                                           |
|          |        |            |                                                                |                                                                                                                                                                                               |                                                                                   |                                                         |                                                           |
|          |        |            |                                                                |                                                                                                                                                                                               |                                                                                   |                                                         |                                                           |
|          |        |            |                                                                |                                                                                                                                                                                               |                                                                                   |                                                         |                                                           |
|          |        |            |                                                                |                                                                                                                                                                                               |                                                                                   |                                                         |                                                           |
|          |        |            |                                                                |                                                                                                                                                                                               |                                                                                   |                                                         |                                                           |
|          |        |            |                                                                |                                                                                                                                                                                               |                                                                                   |                                                         |                                                           |
|          |        |            |                                                                |                                                                                                                                                                                               |                                                                                   |                                                         |                                                           |
|          |        |            |                                                                |                                                                                                                                                                                               |                                                                                   |                                                         |                                                           |
|          |        |            |                                                                |                                                                                                                                                                                               |                                                                                   |                                                         |                                                           |
|          |        |            |                                                                |                                                                                                                                                                                               |                                                                                   |                                                         |                                                           |
|          |        |            |                                                                |                                                                                                                                                                                               |                                                                                   |                                                         |                                                           |
|          |        |            |                                                                |                                                                                                                                                                                               |                                                                                   |                                                         |                                                           |

Deshmukh SR, Mousoulis C, Marson BA et al. Developing a core outcome set for hand fractures and joint injuries in adults: a systematic review. Journal of Hand Surgery (Eur) 2021;46(5):488-495

## Supplementary File 4 COMET outcome taxonomy

**Title:** Supplemental File 4 COMET outcome taxonomy - adapted from Dodd et al (2018)

| <b>Core Area</b>              | <b>Outcome Domain</b>                                                                                |
|-------------------------------|------------------------------------------------------------------------------------------------------|
| <b>Death</b>                  | 1. Mortality/ survival                                                                               |
| <b>Physiological/clinical</b> | 2. Blood and lymphatic system outcomes                                                               |
|                               | 3. Cardiac outcomes                                                                                  |
|                               | 4. Congenital, familial and genetic outcomes                                                         |
|                               | 5. Endocrine outcomes                                                                                |
|                               | 6. Ear and labyrinth outcomes                                                                        |
|                               | 7. Eye outcomes                                                                                      |
|                               | 8. Gastrointestinal outcomes                                                                         |
|                               | 9. General outcomes                                                                                  |
|                               | 10. Hepatobiliary outcomes                                                                           |
|                               | 11. Immune system outcomes                                                                           |
|                               | 12. Infection and infestation outcomes                                                               |
|                               | 13. Injury and poisoning outcomes                                                                    |
|                               | 14. Metabolism and nutrition outcomes                                                                |
|                               | 15. Musculoskeletal and connective tissue outcomes                                                   |
|                               | 16. Outcomes, relating to neoplasms: benign, malignant and unspecified ( including cysts and polyps) |
|                               | 17. Nervous system outcomes                                                                          |
|                               | 18. Pregnancy, puerperium and perinatal outcomes                                                     |
|                               | 19. Renal and urinary outcomes                                                                       |
|                               | 20. Reproductive system and breast outcomes                                                          |
|                               | 21. Psychiatric outcomes                                                                             |
|                               | 22. Respiratory, thoracic and mediastinal outcomes                                                   |
|                               | 23. Skin and subcutaneous tissue outcomes                                                            |
|                               | 24. Vascular outcomes                                                                                |
| <b>Life Impact</b>            | <b>Functioning</b>                                                                                   |
|                               | 25. Physical functioning                                                                             |
|                               | 26. Social functioning                                                                               |
|                               | 27. Role functioning                                                                                 |
|                               | 28. Emotional functioning/ well being                                                                |
|                               | 29. Cognitive functioning                                                                            |
|                               | 30. Global quality of life                                                                           |
|                               | 31. Perceived health status                                                                          |
|                               | 32. Delivery of care                                                                                 |
|                               | 33. Personal circumstances                                                                           |
| <b>Resource use</b>           | <b>Resource Use</b>                                                                                  |
|                               | 34. Economic                                                                                         |
|                               | 35. Hospital                                                                                         |
|                               | 36. Need for further intervention                                                                    |
|                               | 37. Societal/ carer burden                                                                           |
| <b>Adverse Events</b>         | 38. Adverse Events / effects                                                                         |

Dodd S, Clarke M, Becker L et al. A taxonomy has been developed for outcomes in medical research to help improve knowledge discovery. *J Clin Epidemiol.* 2018;96:84-92.



## Supplementary file 5. Included Studies

|    | Study title                                                                                                                                                                                                    | First author  | Year of publication |
|----|----------------------------------------------------------------------------------------------------------------------------------------------------------------------------------------------------------------|---------------|---------------------|
| 1  | Effectiveness and safety of home-based muscle electrical stimulator in brachial plexus Injury patient                                                                                                          | Limthongthang | 2014                |
| 2  | Elbow proprioception sense in total arm -type brachial plexus injured patients after neurotisation: a preliminary study                                                                                        | Homreprasert  | 2014                |
| 3  | Comparison between the anterior and posterior approach for transfer of the spinal accessory nerve to the suprascapular nerve in late traumatic brachial plexus injuries                                        | Souza         | 2014                |
| 4  | Ultrasound-guided peripheral nerve stimulation for neuropathic pain after brachial plexus injury: two case reports                                                                                             | Kim           | 2017                |
| 5  | Contralateral lower trapezius transfer for restoration of shoulder external rotation in traumatic brachial plexus palsy: preliminary report and literature review                                              | Satbhai       | 2014                |
| 6  | Restoration of shoulder abduction in brachial plexus avulsion injuries with double neurotization from the spinal accessory nerve: a report of 13 cases                                                         | Huan          | 2017                |
| 7  | Transfer of the musculocutaneous nerve branch to the brachialis muscle to the triceps for elbow extension: anatomical study and report of five cases                                                           | Bertelli      | 2017                |
| 8  | Posterior approach for accessory to suprascapular nerve transfer: an electrophysiological outcomes study                                                                                                       | Rui           | 2013                |
| 9  | Reliability of functioning free muscle transfer and vascularized ulnar nerve grafting for elbow flexion in complete brachial plexus palsy                                                                      | Potter        | 2017                |
| 10 | Management of infraclavicular (Chuang Level IV) brachial plexus injuries: A single surgeon experience with 75 cases                                                                                            | Lam           | 2015                |
| 11 | Functioning free muscle transfer for the restoration of elbow flexion in brachial plexus injury patients                                                                                                       | Estrella      | 2016                |
| 12 | Radial to axillary nerve transfers: A combined case series                                                                                                                                                     | Desai         | 2016                |
| 13 | Thalamic deep brain stimulation for neuropathic pain after amputation or brachial plexus avulsion                                                                                                              | Pereira       | 2013                |
| 14 | Nerve transfers for shoulder function for traumatic brachial plexus injuries                                                                                                                                   | Estrella      | 2014                |
| 15 | Results of operative treatment of brachial plexus injury resulting from shoulder dislocation: A study with a long-term follow-up                                                                               | Gutkowska     | 2017                |
| 16 | Surgical treatment of brachial plexus posterior cord lesion: A combination of nerve and tendon transfers, about nine patients                                                                                  | Oberlin       | 2013                |
| 17 | The medial cord to musculocutaneous (MCMc) nerve transfer: a new method to reanimate elbow flexion after C5-C6-C7-(C8) avulsive injuries of the brachial plexus—technique and results                          | Ferraresi     | 2014                |
| 18 | Transfer of a terminal motor branch nerve to the flexor carpi ulnaris for triceps reinnervation: anatomical study and clinical cases                                                                           | Bertelli      | 2015                |
| 19 | Free functioning gracilis muscle transfer with and without simultaneous intercostal nerve transfer to musculocutaneous nerve for restoration of elbow flexion after traumatic adult brachial pan-plexus injury | Maldonado     | 2017(a)             |

## Supplementary file 5. Included Studies

|    |                                                                                                                                                                                                         |                 |      |
|----|---------------------------------------------------------------------------------------------------------------------------------------------------------------------------------------------------------|-----------------|------|
| 20 | Isolated latissimus dorsi transfer to restore shoulder external rotation in adults with brachial plexus injury                                                                                          | Ghosh           | 2013 |
| 21 | Functional outcome and quality of life after traumatic total brachial plexus injury treated by nerve transfer or single/double free muscle transfers                                                    | Satbhai         | 2016 |
| 22 | Successful graded mirror therapy in a patient with chronic deafferentation pain in whom traditional mirror therapy was ineffective: A case report                                                       | Mibu            | 2016 |
| 23 | Bipolar Transfer of Latissimus Dorsi Myocutaneous Flap for Restoration of Elbow Flexion in Late Traumatic Brachial Plexus Injury: Evaluation of 13 Cases                                                | Azab            | 2017 |
| 24 | Comparison of objective muscle strength in C5-C6 and C5-C7 brachial plexus injury patients after double nerve transfer                                                                                  | Tsai            | 2014 |
| 25 | Phantom remodeling effect of dorsal root entry zone lesioning in phantom limb pain caused by brachial plexus avulsion                                                                                   | Son             | 2015 |
| 26 | Comparison of surgical strategies between proximal nerve graft and/or nerve transfer and distal nerve transfer based on functional restoration of elbow flexion: A retrospective review of 147 patients | Hu              | 2018 |
| 27 | Reconstruction of shoulder abduction by multiple nerve fascicle transfer through posterior approach                                                                                                     | Ren             | 2013 |
| 28 | Intercostal nerve transfer to neurotize the musculocutaneous nerve after traumatic brachial plexus avulsion: A comparison of two, three, and four nerve transfers                                       | Xiao            | 2014 |
| 29 | Use of the DEKA Arm for amputees with brachial plexus injury: A case series                                                                                                                             | Resnik          | 2017 |
| 30 | Polyester tape scapulopexy for chronic upper extremity brachial plexus injury                                                                                                                           | Leechavengvongs | 2015 |
| 31 | Contralateral C7 nerve transfer with direct coaptation to restore lower trunk function after traumatic brachial plexus avulsion                                                                         | Wang            | 2013 |
| 32 | Outcome of surgical reconstruction after traumatic total brachial plexus palsy                                                                                                                          | Dodakundi       | 2013 |
| 33 | Bionic reconstruction to restore hand function after brachial plexus injury: a case series of three patients                                                                                            | Aszmann         | 2015 |
| 34 | Surgical treatment of the plexus brachialis injury using long-lasting electrostimulation                                                                                                                | Tsymbalyuk      | 2013 |
| 35 | Phrenic nerve transfer for reconstruction of elbow extension in severe brachial plexus injuries                                                                                                         | Flores          | 2016 |
| 36 | Direct coaptation of the phrenic nerve with the posterior division of the lower trunk to restore finger and elbow extension function in patients with total brachial plexus injuries                    | Wang            | 2016 |
| 37 | A prospective study comparing single and double fascicular transfer to restore elbow flexion after brachial plexus injury                                                                               | Martins         | 2013 |
| 38 | Chronic post-traumatic neuropathic pain of brachial plexus and upper limb: a new technique of peripheral nerve stimulation                                                                              | Stevanato       | 2014 |

## Supplementary file 5. Included Studies

|    |           |                                                                                                                                                                            |                 |         |
|----|-----------|----------------------------------------------------------------------------------------------------------------------------------------------------------------------------|-----------------|---------|
| 1  |           |                                                                                                                                                                            |                 |         |
| 2  |           |                                                                                                                                                                            |                 |         |
| 3  | <b>39</b> | Effectiveness of contralateral C7 nerve root and multiple nerve transfer for treatment of brachial plexus root avulsion                                                    | Wei             | 2014    |
| 4  |           |                                                                                                                                                                            |                 |         |
| 5  | <b>40</b> | Combined proximal nerve graft and distal nerve transfer for a posterior cord brachial plexus injury                                                                        | Plate           | 2013    |
| 6  |           |                                                                                                                                                                            |                 |         |
| 7  | <b>41</b> | The role of elective amputation in patients with traumatic brachial plexus injury                                                                                          | Maldonado       | 2016    |
| 8  |           |                                                                                                                                                                            |                 |         |
| 9  | <b>42</b> | Early microsurgical management of clavicular fracture combined with brachial plexus injury                                                                                 | Liu             | 2014(a) |
| 10 |           |                                                                                                                                                                            |                 |         |
| 11 | <b>43</b> | Contralateral trapezius transfer to restore shoulder external rotation following adult brachial plexus injury                                                              | Elhassan        | 2016    |
| 12 |           |                                                                                                                                                                            |                 |         |
| 13 | <b>44</b> | Comparative study of phrenic nerve transfers with and without nerve graft for elbow flexion after global brachial plexus injury                                            | Liu             | 2014    |
| 14 |           |                                                                                                                                                                            |                 |         |
| 15 | <b>45</b> | Shoulder and elbow recovery at 2 and 11 years following brachial plexus reconstruction                                                                                     | Wang            | 2016    |
| 16 |           |                                                                                                                                                                            |                 |         |
| 17 | <b>46</b> | Functional outcomes after treatment of traumatic brachial plexus injuries: clinical study                                                                                  | Aras            | 2013    |
| 18 |           |                                                                                                                                                                            |                 |         |
| 19 | <b>47</b> | Free gracilis transfer reinnervated by the nerve to the supinator for the reconstruction of finger and thumb extension in longstanding C7-T1 brachial plexus root avulsion | Soldado         | 2013    |
| 20 |           |                                                                                                                                                                            |                 |         |
| 21 | <b>48</b> | Restoration of hand function in C7–T1 brachial plexus palsies using a staged approach with nerve and tendon transfer                                                       | Zhang           | 2014    |
| 22 |           |                                                                                                                                                                            |                 |         |
| 23 | <b>49</b> | Neurotization to innervate the deltoid and biceps: 3 cases                                                                                                                 | Dy              | 2013    |
| 24 |           |                                                                                                                                                                            |                 |         |
| 25 | <b>50</b> | Arthroscopic arthrodesis of the shoulder in brachial plexus palsy                                                                                                          | Lenoir          | 2017    |
| 26 |           |                                                                                                                                                                            |                 |         |
| 27 | <b>51</b> | Outcome of contralateral C7 nerve transferring to median nerve                                                                                                             | Gao             | 2013    |
| 28 |           |                                                                                                                                                                            |                 |         |
| 29 | <b>52</b> | Intercostal nerve transfer to the biceps motor branch in complete traumatic brachial plexus injuries                                                                       | Cho             | 2015    |
| 30 |           |                                                                                                                                                                            |                 |         |
| 31 | <b>53</b> | Tactile feedback for relief of deafferentation pain using virtual reality system: a pilot study                                                                            | Sano            | 2016    |
| 32 |           |                                                                                                                                                                            |                 |         |
| 33 | <b>54</b> | Functioning free gracilis transfer to reconstruct elbow flexion and quality of life in global brachial plexus injured patients                                             | Yang            | 2016    |
| 34 |           |                                                                                                                                                                            |                 |         |
| 35 | <b>55</b> | Evaluation of infrapinatus reinnervation and function following spinal accessory nerve to suprascapular nerve transfer in adult traumatic brachial plexus injuries         | Baltzer         | 2017    |
| 36 |           |                                                                                                                                                                            |                 |         |
| 37 | <b>56</b> | Anatomic study of the intercostal nerve transfer to the suprascapular nerve and a case report                                                                              | Hu              | 2014    |
| 38 |           |                                                                                                                                                                            |                 |         |
| 39 | <b>57</b> | Shoulder abduction and external rotation restoration with nerve transfer                                                                                                   | Kostas-Agnantis | 2013    |
| 40 |           |                                                                                                                                                                            |                 |         |
| 41 | <b>58</b> | Contralateral C-7 transfer: is direct repair really superior to grafting?                                                                                                  | Bhatia          | 2017    |
| 42 |           |                                                                                                                                                                            |                 |         |
| 43 | <b>59</b> | Impact of phrenic nerve paralysis on the surgical outcome of intercostal nerve transfer                                                                                    | Kita            | 2015    |
| 44 |           |                                                                                                                                                                            |                 |         |
| 45 | <b>60</b> | Flow-through anastomosis using a T-shaped vascular pedicle for gracilis functioning free muscle transplantation in brachial plexus injury                                  | Hou             | 2015    |
| 46 |           |                                                                                                                                                                            |                 |         |
| 47 | <b>61</b> | Free functional muscle transfer tendon insertion secondary advancement procedure to improve elbow flexion                                                                  | Sechachalam     | 2017    |
| 48 |           |                                                                                                                                                                            |                 |         |
| 49 |           |                                                                                                                                                                            |                 |         |
| 50 |           |                                                                                                                                                                            |                 |         |
| 51 |           |                                                                                                                                                                            |                 |         |
| 52 |           |                                                                                                                                                                            |                 |         |
| 53 |           |                                                                                                                                                                            |                 |         |
| 54 |           |                                                                                                                                                                            |                 |         |
| 55 |           |                                                                                                                                                                            |                 |         |
| 56 |           |                                                                                                                                                                            |                 |         |
| 57 |           |                                                                                                                                                                            |                 |         |
| 58 |           |                                                                                                                                                                            |                 |         |
| 59 |           |                                                                                                                                                                            |                 |         |
| 60 |           |                                                                                                                                                                            |                 |         |

## Supplementary file 5. Included Studies

|    |                                                                                                                                                                                         |               |      |
|----|-----------------------------------------------------------------------------------------------------------------------------------------------------------------------------------------|---------------|------|
| 62 | Dual nerve transfers for restoration of shoulder function after brachial plexus avulsion injury                                                                                         | Chu           | 2016 |
| 63 | Cortical plasticity after brachial plexus injury and repair: a resting-state functional MRI study                                                                                       | Bhat          | 2017 |
| 64 | Results of spinal accessory to suprascapular nerve transfer in 110 patients with complete palsy of the brachial plexus                                                                  | Bertelli      | 2016 |
| 65 | Magnetic resonance neurographic and clinical long-term results after oberlins transfer for adult brachial plexus injuries                                                               | Frueh         | 2017 |
| 66 | Free functioning gracilis muscle transfer versus intercostal nerve transfer to musculocutaneous nerve for restoration of elbow flexion after traumatic adult brachial pan-plexus injury | Maldonado     | 2016 |
| 67 | Results of wrist extension reconstruction in C5–8 brachial plexus palsy by transferring the pronator quadratus motor branch to the extensor carpi radialis brevis muscle                | Bertelli      | 2016 |
| 68 | Donor nerve sources in free functional gracilis muscle transfer for elbow flexion in adult brachial plexus injury                                                                       | Nicoson       | 2017 |
| 69 | Use of contralateral spinal accessory nerve for ipsilateral suprascapular neurotization in global brachial plexus injury: a new technique                                               | Bhandari      | 2016 |
| 70 | Objective evaluation of elbow flexion strength and fatigability after nerve transfer in adult traumatic brachial plexus injuries                                                        | Marcicq       | 2014 |
| 71 | Outcomes of muscle brachialis transfer to restore finger flexion in brachial plexus palsy                                                                                               | DeGeorge      | 2017 |
| 72 | Functional outcome of nerve transfers for traumatic global brachial plexus avulsion                                                                                                     | Liu           | 2013 |
| 73 | Transfer of a flexor digitorum superficialis motor branch for wrist extension reconstruction in C5-C8 root injuries of the brachial plexus: a case series                               | Bertelli      | 2013 |
| 74 | Outcome after transfer of intercostal nerves to the nerve of triceps long head in 25 adult patients with total plexus root avulsion injury                                              | Gao           | 2013 |
| 75 | Good sensory recovery of the hand in brachial plexus surgery using the intercostobrachial nerve as the donor                                                                            | Froni         | 2017 |
| 76 | The phrenic nerve as a donor for brachial plexus injuries: is it safe and effective? Case series and literature analysis                                                                | Socolovsky    | 2015 |
| 77 | Complete avulsion of brachial plexus with associated vascular trauma: Feasibility of reconstruction using the double free muscle technique                                              | Hattori       | 2013 |
| 78 | Long-term outcome of brachial plexus re-implantation after complete brachial plexus avulsion injury                                                                                     | Kachramanoglu | 2017 |
| 79 | Force recovery assessment of functioning free muscle transfers using ultrasonography                                                                                                    | Kodama        | 2014 |
| 80 | Rhomboid nerve transfer to the suprascapular nerve for shoulder reanimation in brachial plexus palsy: A clinical report                                                                 | Goubier       | 2016 |
| 81 | Outcome of contralateral C7 transfer to two recipient nerves in 22 patients with the total brachial plexus avulsion injury                                                              | Gao           | 2013 |
| 82 | Comparative study of phrenic and intercostal nerve transfers for elbow flexion after global brachial plexus injury                                                                      | Liu           | 2015 |

## Supplementary file 5. Included Studies

|    |            |                                                                                                                                                                                                                             |                     |
|----|------------|-----------------------------------------------------------------------------------------------------------------------------------------------------------------------------------------------------------------------------|---------------------|
| 1  |            |                                                                                                                                                                                                                             |                     |
| 2  |            |                                                                                                                                                                                                                             |                     |
| 3  | <b>83</b>  | Donor-side morbidity after contralateral C-7 nerve transfer: results at a minimum of 6 months after surgery                                                                                                                 | Li 2016             |
| 4  |            |                                                                                                                                                                                                                             |                     |
| 5  | <b>84</b>  | Outcome after brachial plexus injury surgery and impact on quality of life                                                                                                                                                  | Rasulić 2017        |
| 6  |            |                                                                                                                                                                                                                             |                     |
| 7  | <b>85</b>  | Pronator teres branch transfer to the anterior interosseous nerve for treating C8T1 brachial plexus avulsion: An anatomic study and case report                                                                             | Yang 2014           |
| 8  |            |                                                                                                                                                                                                                             |                     |
| 9  | <b>86</b>  | Operative treatment with nerve repair can restore function in patients with traction injuries in the brachial plexus                                                                                                        | Stiasny 2015        |
| 10 |            |                                                                                                                                                                                                                             |                     |
| 11 | <b>87</b>  | Thoracodorsal nerve transfer for triceps reinnervation in partial brachial plexus injuries                                                                                                                                  | Soldado 2016        |
| 12 |            |                                                                                                                                                                                                                             |                     |
| 13 | <b>88</b>  | Co-infusion of autologous adipose tissue derived neuronal differentiated mesenchymal stem cells and bone marrow derived hematopoietic stem cells, a viable therapy for post-traumatic brachial plexus injury: a case report | Thakkar 2014        |
| 14 |            |                                                                                                                                                                                                                             |                     |
| 15 | <b>89</b>  | Long-term clinical outcomes of spinal accessory nerve transfer to the suprascapular nerve in patients with brachial plexus palsy                                                                                            | Emamhadi 2016       |
| 16 |            |                                                                                                                                                                                                                             |                     |
| 17 | <b>90</b>  | Surgical treatment for total root avulsion type brachial plexus injuries by neurotisation: a prospective comparison study between total and hemicentralateral C7 nerve root transfer                                        | Tu 2014             |
| 18 |            |                                                                                                                                                                                                                             |                     |
| 19 | <b>91</b>  | Deactivation of distant pain-related regions induced by 20-day rTMS: a case study of one-week pain relief for long-term intractable deafferentation pain                                                                    | Qiu 2014            |
| 20 |            |                                                                                                                                                                                                                             |                     |
| 21 | <b>92</b>  | End-to-side neurotisation in brachial plexus reconstruction                                                                                                                                                                 | Haninec 2013        |
| 22 |            |                                                                                                                                                                                                                             |                     |
| 23 | <b>93</b>  | Reanimation of elbow extension with medial pectoral nerve transfer in partial injuries to the brachial plexus                                                                                                               | Flores 2013         |
| 24 |            |                                                                                                                                                                                                                             |                     |
| 25 | <b>94</b>  | Early post-operative results after repair of traumatic brachial plexus palsy                                                                                                                                                | Mohammad-Reda 2013  |
| 26 |            |                                                                                                                                                                                                                             |                     |
| 27 | <b>95</b>  | Satisfied patients after shoulder arthrodesis for brachial plexus lesions even after 20 years of follow-up                                                                                                                  | van der Lingen 2018 |
| 28 |            |                                                                                                                                                                                                                             |                     |
| 29 | <b>96</b>  | Posterior branch of the axillary nerve transfer to the lateral triceps branch for restoration of elbow extension: case report                                                                                               | Kilka 2013          |
| 30 |            |                                                                                                                                                                                                                             |                     |
| 31 | <b>97</b>  | Clinical analysis of repairing the whole brachial plexus nerve root avulsion by transferring C7 nerve root from the uninjured side                                                                                          | Liu 2014            |
| 32 |            |                                                                                                                                                                                                                             |                     |
| 33 | <b>98</b>  | Bipolar transfer of the pectoralis major muscle for restoration of elbow flexion in 29 cases                                                                                                                                | Cambon-Binder 2018  |
| 34 |            |                                                                                                                                                                                                                             |                     |
| 35 | <b>99</b>  | Thoracodorsal nerve transfer for elbow flexion reconstruction in infraclavicular brachial plexus injuries                                                                                                                   | Soldado 2014        |
| 36 |            |                                                                                                                                                                                                                             |                     |
| 37 | <b>100</b> | Median nerve fascicle transfer versus ulnar nerve fascicle transfer to the biceps motor branch in C5-C6 and C5-C7 brachial plexus injuries: nonrandomised prospective study of 23 consecutive patients                      | Cho 2014            |
| 38 |            |                                                                                                                                                                                                                             |                     |
| 39 | <b>101</b> | Free functional muscle transplantation of an anomalous femoral adductor with a very large muscle belly: a case report                                                                                                       | Kaizawa 2013        |
| 40 |            |                                                                                                                                                                                                                             |                     |
| 41 | <b>102</b> | Selective neurotisation of the radial nerve in the axilla using the intercostal nerve to treat complete brachial plexus palsy                                                                                               | Tuohuti 2016        |
| 42 |            |                                                                                                                                                                                                                             |                     |
| 43 |            |                                                                                                                                                                                                                             |                     |
| 44 |            |                                                                                                                                                                                                                             |                     |
| 45 |            |                                                                                                                                                                                                                             |                     |
| 46 |            |                                                                                                                                                                                                                             |                     |
| 47 |            |                                                                                                                                                                                                                             |                     |
| 48 |            |                                                                                                                                                                                                                             |                     |
| 49 |            |                                                                                                                                                                                                                             |                     |
| 50 |            |                                                                                                                                                                                                                             |                     |
| 51 |            |                                                                                                                                                                                                                             |                     |
| 52 |            |                                                                                                                                                                                                                             |                     |
| 53 |            |                                                                                                                                                                                                                             |                     |
| 54 |            |                                                                                                                                                                                                                             |                     |
| 55 |            |                                                                                                                                                                                                                             |                     |
| 56 |            |                                                                                                                                                                                                                             |                     |
| 57 |            |                                                                                                                                                                                                                             |                     |
| 58 |            |                                                                                                                                                                                                                             |                     |
| 59 |            |                                                                                                                                                                                                                             |                     |
| 60 |            |                                                                                                                                                                                                                             |                     |

## Supplementary file 5. Included Studies

|    |            |                                                                                                                                                                                                                                                 |               |         |
|----|------------|-------------------------------------------------------------------------------------------------------------------------------------------------------------------------------------------------------------------------------------------------|---------------|---------|
| 1  |            |                                                                                                                                                                                                                                                 |               |         |
| 2  |            |                                                                                                                                                                                                                                                 |               |         |
| 3  | <b>103</b> | Objective predictors of functional recovery associated with intercostal nerves transfer for triceps reinnervation in global brachial plexus palsy                                                                                               | Flores        | 2016    |
| 4  |            |                                                                                                                                                                                                                                                 |               |         |
| 5  | <b>104</b> | Nerve transfer to relieve pain in upper brachial plexus injuries: does it work?                                                                                                                                                                 | Emamhadi      | 2017    |
| 6  |            |                                                                                                                                                                                                                                                 |               |         |
| 7  | <b>105</b> | Phrenic nerve transfer versus intercostal nerve transfer for the repair of brachial plexus root avulsion injuries                                                                                                                               | Abdixbir      | 2016    |
| 8  |            |                                                                                                                                                                                                                                                 |               |         |
| 9  | <b>106</b> | End-to-side neurorrhaphy to restore elbow flexion in brachial plexus injury                                                                                                                                                                     | Limthongthang | 2016    |
| 10 |            |                                                                                                                                                                                                                                                 |               |         |
| 11 | <b>107</b> | Chordata method combined with electrotherapy in functional recovery after brachial plexus injury:report of three clinical cases                                                                                                                 | De Oliveira   | 2016    |
| 12 |            |                                                                                                                                                                                                                                                 |               |         |
| 13 | <b>108</b> | Clinical outcome following transfer of the supinator motor branch to the posterior interosseous nerve in patients with C7-T1 brachial plexus palsy                                                                                              | Xu            | 2015    |
| 14 |            |                                                                                                                                                                                                                                                 |               |         |
| 15 | <b>109</b> | Transposition of branches of radial nerve innervating supinator to posterior interosseous nerve for functional reconstruction of finger and thumb extension in 4 patients with middle and lower trunk root avulsion injuries of brachial plexus | Wu            | 2017    |
| 16 |            |                                                                                                                                                                                                                                                 |               |         |
| 17 | <b>110</b> | Electromyographic findings in gracilis muscle grafts used to augment elbow flexion in traumatic brachial plexopathy                                                                                                                             | Kazamel       | 2016    |
| 18 |            |                                                                                                                                                                                                                                                 |               |         |
| 19 | <b>111</b> | Double distal intraneural fascicular nerve transfers for lower brachial plexus injuries                                                                                                                                                         | Li            | 2016    |
| 20 |            |                                                                                                                                                                                                                                                 |               |         |
| 21 | <b>112</b> | Restoration of elbow and hand function in total brachial plexus palsy with intercostal nerves and C5 root neurotisation. Results in 21 patients                                                                                                 | Amal          | 2016    |
| 22 |            |                                                                                                                                                                                                                                                 |               |         |
| 23 | <b>113</b> | The phrenic nerve transfer in the treatment of a septuagenarian with brachial plexus avulsion injury: a case study                                                                                                                              | Jiang         | 2018    |
| 24 |            |                                                                                                                                                                                                                                                 |               |         |
| 25 | <b>114</b> | Outcomes of transferring a healthy motor fascicle from the radial nerve to a branch of the triceps to recover elbow extension in partial brachial plexus palsy                                                                                  | Flores        | 2017    |
| 26 |            |                                                                                                                                                                                                                                                 |               |         |
| 27 | <b>115</b> | Successful nerve transfers for traumatic brachial plexus palsy in a septuagenarian                                                                                                                                                              | Johnsen       | 2016    |
| 28 |            |                                                                                                                                                                                                                                                 |               |         |
| 29 | <b>116</b> | Free functioning gracilis muscle transfer for elbow flexion reconstruction after traumatic brachial pan-plexus injury: Where is the optimal distal tendon attachment for elbow flexion?                                                         | Maldonado     | 2017(b) |
| 30 |            |                                                                                                                                                                                                                                                 |               |         |
| 31 | <b>117</b> | Results of distal nerve transfers in restoration of shoulder function in C5 and C6 root avulsion injury to the brachial plexus                                                                                                                  | Bhandari      | 2017    |
| 32 |            |                                                                                                                                                                                                                                                 |               |         |
| 33 | <b>118</b> | Bipolar dual-lead spinal cord stimulation between two electrodes on the ventral and dorsal sides of the spinal cord: consideration of putative mechanisms                                                                                       | Watanabe      | 2018    |
| 34 |            |                                                                                                                                                                                                                                                 |               |         |
| 35 | <b>119</b> | Triceps nerve to deltoid nerve transfer after an unsatisfactory intra-plexus neurotisation of the posterior division of the upper trunk                                                                                                         | Al-Qattan     | 2017    |
| 36 |            |                                                                                                                                                                                                                                                 |               |         |
| 37 | <b>120</b> | Trapezius muscle transfer for restoration of elbow extension in a traumatic brachial plexus injury                                                                                                                                              | Alrabai       | 2018    |
| 38 |            |                                                                                                                                                                                                                                                 |               |         |
| 39 | <b>121</b> | Transfer of the radial nerve branch to the extensor carpi radialis brevis to the anterior interosseous nerve to reconstruct thumb and finger flexion                                                                                            | Bertelli      | 2015    |
| 40 |            |                                                                                                                                                                                                                                                 |               |         |
| 41 |            |                                                                                                                                                                                                                                                 |               |         |
| 42 |            |                                                                                                                                                                                                                                                 |               |         |
| 43 |            |                                                                                                                                                                                                                                                 |               |         |
| 44 |            |                                                                                                                                                                                                                                                 |               |         |
| 45 |            |                                                                                                                                                                                                                                                 |               |         |
| 46 |            |                                                                                                                                                                                                                                                 |               |         |
| 47 |            |                                                                                                                                                                                                                                                 |               |         |
| 48 |            |                                                                                                                                                                                                                                                 |               |         |
| 49 |            |                                                                                                                                                                                                                                                 |               |         |
| 50 |            |                                                                                                                                                                                                                                                 |               |         |
| 51 |            |                                                                                                                                                                                                                                                 |               |         |
| 52 |            |                                                                                                                                                                                                                                                 |               |         |
| 53 |            |                                                                                                                                                                                                                                                 |               |         |
| 54 |            |                                                                                                                                                                                                                                                 |               |         |
| 55 |            |                                                                                                                                                                                                                                                 |               |         |
| 56 |            |                                                                                                                                                                                                                                                 |               |         |
| 57 |            |                                                                                                                                                                                                                                                 |               |         |
| 58 |            |                                                                                                                                                                                                                                                 |               |         |
| 59 |            |                                                                                                                                                                                                                                                 |               |         |
| 60 |            |                                                                                                                                                                                                                                                 |               |         |

## Supplementary file 5. Included Studies

|    |            |                                                                          |               |      |
|----|------------|--------------------------------------------------------------------------|---------------|------|
| 1  |            |                                                                          |               |      |
| 2  |            |                                                                          |               |      |
| 3  | <b>122</b> | Ultrasound-guided pulse-dose radiofrequency: treatment of                | Magistrini    | 2014 |
| 4  |            | neuropathic pain after brachial plexus lesion and arm vascularisation    |               |      |
| 5  |            |                                                                          |               |      |
| 6  | <b>123</b> | Phrenic nerve transfer to the musculocutaneous nerve for the repair      | Liu           | 2015 |
| 7  |            | of brachial plexus injury: electrophysiological characteristics          |               |      |
| 8  | <b>124</b> | Postoperative motor deficits following elbow flexion reanimation by      | Hanneur       | 2018 |
| 9  |            | nerve transfer                                                           |               |      |
| 10 |            |                                                                          |               |      |
| 11 | <b>125</b> | Comparative study of phrenic and partial ulnar nerve transfers for       | Liu           | 2018 |
| 12 |            | elbow flexion after upper brachial plexus avulsion-a retrospective       |               |      |
| 13 |            | clinical analysis                                                        |               |      |
| 14 | <b>126</b> | Contralateral medial pectoral nerve transfer with free gracilis muscle   | Yavari        | 2018 |
| 15 |            | transfer in old brachial plexus injury                                   |               |      |
| 16 |            |                                                                          |               |      |
| 17 | <b>127</b> | MEG-BMI to control phantom limb pain                                     | Yanagisawa    | 2018 |
| 18 | <b>128</b> | Complete brachial plexus injury- an amputation dilemma, A case           | Choong        | 2015 |
| 19 |            | report                                                                   |               |      |
| 20 |            |                                                                          |               |      |
| 21 | <b>129</b> | Reversal of phantom pain and hand-to-face remapping after brachial       | Tsao          | 2016 |
| 22 |            | plexus avulsion                                                          |               |      |
| 23 | <b>130</b> | A newly developed upper limb single-joint HAL in a patient with elbow    | Kubota        | 2017 |
| 24 |            | flexion reconstruction after traumatic brachial plexus injury: A case    |               |      |
| 25 |            | report                                                                   |               |      |
| 26 |            |                                                                          |               |      |
| 27 | <b>131</b> | Free reverse gracilis muscle combined with steindler flexorplasty for    | Bertelli      | 2018 |
| 28 |            | elbow flexion reconstruction after failed primary repair of extended     |               |      |
| 29 |            | upper-type paralysis of the brachial plexus                              |               |      |
| 30 |            |                                                                          |               |      |
| 31 | <b>132</b> | Multiple nerve and tendon transfers – a new strategy for restoring       | Xu            | 2017 |
| 32 |            | hand function in a patient with C7-T1 brachial plexus avulsions          |               |      |
| 33 |            |                                                                          |               |      |
| 34 |            | <b>Studies included following updated review May 2021</b>                |               |      |
| 35 | <b>133</b> | Outcomes after occupational therapy intervention for traumatic           | Cole          | 2020 |
| 36 |            | brachial plexus injury: A prospective longitudinal cohort study          |               |      |
| 37 | <b>134</b> | Lower trapezius transfer for patients with brachial plexus injury        | Crepaldi      | 2019 |
| 38 | <b>135</b> | Bionic upper limb reconstruction: A valuable alternative in global       | Hruby         | 2019 |
| 39 |            | brachial plexus avulsion injuries—a case series                          |               |      |
| 40 |            |                                                                          |               |      |
| 41 | <b>136</b> | Transcranial Direct Current Stimulation and mirror therapy for           | Ferreira      | 2020 |
| 42 |            | neuropathic pain after brachial plexus avulsion: A randomised double-    |               |      |
| 43 |            | blind, controlled pilot study                                            |               |      |
| 44 | <b>137</b> | A comparative study of two modalities in pain management of patients     | Razak         | 2019 |
| 45 |            | presenting with chronic brachial neuralgia                               |               |      |
| 46 |            |                                                                          |               |      |
| 47 | <b>138</b> | Do technical components of microanastomoses influence the                | Martins-Filho | 2021 |
| 48 |            | functional outcome of free gracilis muscle transfer for elbow flexion in |               |      |
| 49 |            | traumatic brachial plexus injury                                         |               |      |
| 50 |            |                                                                          |               |      |
| 51 |            |                                                                          |               |      |
| 52 |            |                                                                          |               |      |
| 53 |            |                                                                          |               |      |
| 54 |            |                                                                          |               |      |
| 55 |            |                                                                          |               |      |
| 56 |            |                                                                          |               |      |
| 57 |            |                                                                          |               |      |
| 58 |            |                                                                          |               |      |
| 59 |            |                                                                          |               |      |
| 60 |            |                                                                          |               |      |

## Supplementary file 5. Included Studies

## References

- [1] Limthongthang R, Muennoi P, Phoojaroenchanachai R et al. Effectiveness and safety of home-based muscle electrical stimulator in brachial plexus injury patients. *J Med Assoc Thai* 2014;97:S56–61.
- [2] Homsreprasert T, Limthongthang R, Vathana T et al. Elbow joint proprioceptive sense in total arm-type brachial plexus injured patients after neurotization: a preliminary study. *J Med Assoc Thai* 2014;97:S103–7.
- [3] Souza F, Bernardino S, Filho H et al. Comparison between the anterior and posterior approach for transfer of the spinal accessory nerve to the suprascapular nerve in late traumatic brachial plexus injuries. *Acta Neurochir (Wien)* 2014;156: 2345–9.
- [4] Kim JH, Shin SH, Lee YR et al. Ultrasound-guided peripheral nerve stimulation for neuropathic pain after brachial plexus injury: two case reports. *J Anesth* 2017; 31:453–7.
- [5] Satbhai NG, Doi K, Hattori Y, Sakamoto S et al. Contralateral lower trapezius transfer for restoration of shoulder external rotation in traumatic brachial plexus palsy: a preliminary report and literature review. *J Hand Surg Eur* 2014;39:861–7.
- [6] Huan KWSJ, Tan JSW, Tan SH et al. Restoration of shoulder abduction in brachial plexus avulsion injuries with double neurotization from the spinal accessory nerve: a report of 13 cases. *J Hand Surg Eur* 2017;42:700–5.
- [7] Bertelli JA, Soldado F, Ghizoni MF et al. Transfer of the musculocutaneous nerve branch to the brachialis muscle to the triceps for elbow extension: anatomical study and report of five cases. *J Hand Surg Eur* 2017;42:710–4.
- [8] Rui J, Zhao X, Zhu Y et al. Posterior approach for accessory-suprascapular nerve transfer: an electrophysiological outcomes study. *J Hand Surg Eur* 2013;38:242–7.
- [9] Potter SM, Ferris SI. Reliability of functioning free muscle transfer and vascularized ulnar nerve grafting for elbow flexion in complete brachial plexus palsy. *J Hand Surg Eur* 2017; 42: 693–9.
- [10] Lam WL, Fufa D, Chang N-J et al. Management of infraclavicular (Chuang Level IV) brachial plexus injuries: A single surgeon experience with 75 cases. *J Hand Surg Eur* 2015; 40:573–82.
- [11] Estrella EP, Montales TD. Functioning free muscle transfer for the restoration of elbow flexion in brachial plexus injury patients. *Injury* 2016;47:2525–33.
- [12] Desai MJ, Daly CA, Seiler JG et al. Radial to Axillary Nerve Transfers: A Combined Case Series. *J Hand Surg Am* 2016; 41:1128–34.
- [13] Pereira EAC, Boccard SG, Linhares P et al. Thalamic deep brain stimulation for neuropathic pain after amputation or brachial plexus avulsion. *Neurosurg Focus* 2013;35:E7.
- [14] Estrella EP, Favila AS . Nerve transfers for shoulder function for traumatic brachial plexus injuries. *J Reconstr Microsurg* 2014;30:59-64.
- [15] Gutkowska O, Martynkiewicz J, Mizia S et al. Results of Operative Treatment of Brachial Plexus Injury Resulting from Shoulder Dislocation: A Study with A Long-Term Follow-Up. *World Neurosurg* 2017;105:623–31.
- [16] Oberlin C, Chino J, Belkheyar Z. Surgical treatment of brachial plexus posterior cord lesion: A combination of nerve and tendon transfers, about nine patients. *Chir Main* 2013;32:141–6.



## Supplementary file 5. Included Studies

- 1  
2  
3 [17] Ferraresi S, Garozzo D, Basso E et al. The medial cord to musculocutaneous (MCMc) nerve  
4 transfer: A new method to reanimate elbow flexion after C5-C6-C7-(C8) avulsive injuries of  
5 the brachial plexus - Technique and results. *Neurosurg Rev* 2014;37:321–9.  
6  
7 [18] Bertelli J, Soldado F, Ghizoni MF et al. Transfer of a terminal motor branch nerve to the flexor  
8 carpi ulnaris for triceps reinnervation: Anatomical study and clinical cases. *J Hand Surg Am*  
9 2015;40:2229-2235.  
10  
11 [19] Maldonado AA, Kircher MF, Spinner RJ et al. Free Functioning Gracilis Muscle Transfer With  
12 and Without Simultaneous Intercostal Nerve Transfer to Musculocutaneous Nerve for  
13 Restoration of Elbow Flexion After Traumatic Adult Brachial Pan-Plexus Injury. *J Hand Surg*  
14 *Am* 2017;42:293.  
15  
16 [20] Ghosh S, Singh VK, Jeyaseelan L, et al. Isolated latissimus dorsi transfer to restore shoulder  
17 external rotation in adults with brachial plexus injury. *Bone Jt J* 2013;95:660–3.  
18  
19 [21] Satbhai NG, Doi K, Hattori Y et al. Functional outcome and quality of life after traumatic total  
20 brachial plexus injury treated by nerve transfer or single/double free muscle transfers: A  
21 comparative study. *Bone Jt J* 2016;98:209–17.  
22  
23 [22] Mibu A, Nishigami T, Tanaka K et al. Successful Graded Mirror Therapy in a Patient with  
24 Chronic Deafferentation Pain in Whom Traditional Mirror Therapy was Ineffective: A Case  
25 Report. *Pain Pract* 2016;16:E62–9.  
26  
27 [23] Azab AA-H, Alsabbahi MS. Bipolar Transfer of Latissimus Dorsi Myocutaneous Flap for  
28 Restoration of Elbow Flexion in Late Traumatic Brachial Plexus Injury: Evaluation of 13 Cases.  
29 *Ann Plast Surg* 2017;78:98–201.  
30  
31 [24] Tsai YJ, Su FC, Hsiao CK et al. Comparison of objective muscle strength in C5-C6 and C5-C7  
32 brachial plexus injury patients after double nerve transfer. *Microsurgery* 2015;35:107–14.  
33  
34 [25] Son BC, Ha SW. Phantom Remodeling Effect of Dorsal Root Entry Zone Lesioning in Phantom  
35 Limb Pain Caused by Brachial Plexus Avulsion. *Stereotact Funct Neurosurg* 2015;93:240–4.  
36  
37 [26] Hu CH, Chang TN, Lu JC et al. Comparison of Surgical Strategies between Proximal Nerve Graft  
38 and/or Nerve Transfer and Distal Nerve Transfer Based on Functional Restoration of Elbow  
39 Flexion: A Retrospective Review of 147 Patients. *Plast Reconstr Surg* 2018;141:68e-79e.  
40  
41 [27] Ren G, Li R, Xiang D, Yu B. Reconstruction of shoulder abduction by multiple nerve fascicle  
42 transfer through posterior approach. *Injury* 2013;44:492–7.  
43  
44 [28] Xiao C, Lao J, Wang T et al. Intercostal nerve transfer to neurotize the musculocutaneous  
45 nerve after traumatic brachial plexus avulsion: a comparison of two, three, and four nerve  
46 transfers. *J Reconstr Microsurg* 2014;30:297–304.  
47  
48 [29] Resnik L, Fantini C, Latlief G et al. Use of the DEKA Arm for amputees with brachial plexus  
49 injury: A case series. *PLoS One* 2017; 12: e0178642.  
50  
51 [30] Leechavengvongs S, Jiamton C, Uerpairojkit C et al. Polyester tape scapulopexy for chronic  
52 upper extremity brachial plexus injury. *J Hand Surg Am* 2015;40:1184  
53  
54 [31] Wang S, Li P, Xue Y et al. Contralateral C7 nerve transfer with direct coaptation to restore  
55 lower trunk function after traumatic brachial plexus avulsion. *J Bone Joint Surg Am* 2013;95:  
56 821–2.  
57  
58 [32] Dodakundi C, Doi K, Hattori Y et al. Outcome of surgical reconstruction after traumatic total  
59 brachial plexus palsy. *J Bone Joint Surg Am* 2013;95:1505–12.  
60

## Supplementary file 5. Included Studies

- 1  
2  
3 [33] Aszmann OC, Roche AD, Salminger S et al. Bionic reconstruction to restore hand function  
4 after brachial plexus injury: a case series of three patients. *Lancet* 2015; 385:2183–9.  
5  
6 [34] Tsymbaliuk VI, Tretiak IB. [Surgical treatment of the plexus brachialis injury using long-lasting  
7 electrostimulation]. *Klin Khirurgiia* 2013;59–61.  
8  
9 [35] Flores LP, Socolovsky M. Phrenic Nerve Transfer for Reconstruction of Elbow Extension in  
10 Severe Brachial Plexus Injuries. *J Reconstr Microsurg* 2016;32:546–50.  
11  
12 [36] Wang S, Li P, Xue Y et al. Direct Coaptation of the Phrenic Nerve With the Posterior Division of  
13 the Lower Trunk to Restore Finger and Elbow Extension Function in Patients With Total  
14 Brachial Plexus Injuries. *Neurosurgery* 2016;78:208–14.  
15  
16 [37] Martins RS, Siqueira MG, Heise CO et al. A prospective study comparing single and double  
17 fascicular transfer to restore elbow flexion after brachial plexus injury. *Neurosurgery* 2013;  
18 72:709–15.  
19  
20 [38] Stevanato G, Devigili G, Eleopra R et al. Chronic post-traumatic neuropathic pain of brachial  
21 plexus and upper limb: a new technique of peripheral nerve stimulation. *Neurosurg Rev*  
22 2014;37:473–9.  
23  
24 [39] Wei W, Meihua S, Yafei L et al. [EFFECTIVENESS OF CONTRALATERAL C7 NERVE ROOT AND  
25 MULTIPLE NERVES TRANSFER FOR TREATMENT OF BRACHIAL PLEXUS ROOT AVULSION].  
26 *Zhongguo Xiu Fu Chong Jian Wai Ke Za Zhi* 2014;28:737–40.  
27  
28 [40] Plate JF, Ely LK, Pulley BR et al. Combined proximal nerve graft and distal nerve transfer for a  
29 posterior cord brachial plexus injury. *J Neurosurg* 2013;118: 155–9.  
30  
31 [41] Maldonado AA, Kircher MF, Spinner RJ et al. The role of elective amputation in patients with  
32 traumatic brachial plexus injury. *J Plast Reconstr Aesthetic Surg* 2016;69:311–7.  
33  
34 [42] Liu Y, Wang W, Regmi AM et al. Early microsurgical management of clavicular fracture  
35 combined with brachial plexus injury. *Zhongguo Xiu Fu Chong Jian Wai Ke Za Zhi*  
36 2014;28:1329–32.  
37  
38 [43] Elhassan BT, Wagner ER, Spinner RJ et al. Contralateral trapezius transfer to restore shoulder  
39 external rotation following adult brachial plexus injury. *J Hand Surg Am* 2016;41:e45-51.  
40  
41 [44] Liu Y, Lao J, Gao K et al. Comparative study of phrenic nerve transfers with and without nerve  
42 graft for elbow flexion after global brachial plexus injury. *Injury* 2014;45:227–31.  
43  
44 [45] Wang JP, Rancy SK, Lee SK et al. Shoulder and Elbow Recovery at 2 and 11 Years Following  
45 Brachial Plexus Reconstruction. *J Hand Surg Am* 2016;41:173–9.  
46  
47 [46] Aras Y, Aydoseli A, Sabanci PA et al. Functional outcomes after treatment of traumatic  
48 brachial plexus injuries: clinical study. *Ulus Travma Acil Cerrahi Derg* 2013;19:521–8.  
49  
50 [47] Soldado F, Bertelli J. Free gracilis transfer reinnervated by the nerve to the supinator for the  
51 reconstruction of finger and thumb extension in longstanding C7-T1 brachial plexus root  
52 avulsion. *J Hand Surg Am* 2013;38: 941–6.  
53  
54 [48] Zhang CG, Dong Z, Gu YD. Restoration of hand function in C7-T1 brachial plexus palsies using  
55 a staged approach with nerve and tendon transfer. *J Neurosurg* 2014;121:1264–70.  
56  
57 [49] Dy CJ, Kitay A, Garg R et al. Neurotization to innervate the deltoid and biceps: 3 Cases. *J Hand*  
58 *Surg Am* 2013;38:237–40.  
59  
60 [50] Lenoir H, Williams T, Griffart A et al. Arthroscopic arthrodesis of the shoulder in brachial

## Supplementary file 5. Included Studies

- plexus palsy. *J Shoulder Elb Surg* 2017; 26: e115–21.
- [51] Gao K, Lao J, Zhao X et al. Outcome of contralateral C7 nerve transferring to median nerve. *Chin Med J (Engl)* 2013;126:3865–8.
- [52] Cho AB, Iamaguchi RB, Silva GB et al. Intercostal nerve transfer to the biceps motor branch in complete traumatic brachial plexus injuries. *Microsurgery* 2015;35:428–31.
- [53] Sano Y, Wake N, Ichinose A et al. Tactile feedback for relief of deafferentation pain using virtual reality system: a pilot study. *J Neuroeng Rehabil* 2016;13:61.
- [54] Yang Y, Yang JT, Fu G et al. Functioning free gracilis transfer to reconstruct elbow flexion and quality of life in global brachial plexus injured patients. *Sci Rep* 2016;6:22479.
- [55] Baltzer HL, Wagner ER, Kircher MF, et al. Evaluation of infraspinatus reinnervation and function following spinal accessory nerve to suprascapular nerve transfer in adult traumatic brachial plexus injuries. *Microsurgery* 2017;37:365–70.
- [56] Hu S, Chu B, Song J, et al. Anatomic study of the intercostal nerve transfer to the suprascapular nerve and a case report. *J Hand Surg Eur* 2014;39:194–8.
- [57] Kostas-Agnantis I, Korompilias A, Vekris M et al. Shoulder abduction and external rotation restoration with nerve transfer. *Injury* 2013;44:299–304.
- [58] Bhatia A, Doshi P, Koul A, et al. Contralateral C-7 transfer: is direct repair really superior to grafting? *Neurosurg Focus* 2017;43:E3.
- [59] Kita Y, Tajiri Y, Hoshikawa S et al. Impact of phrenic nerve paralysis on the surgical outcome of intercostal nerve transfer. *Hand Surg* 2015; 20:47–52.
- [60] Hou Y, Yang J, Yang Y, et al. Flow-through anastomosis using a T-shaped vascular pedicle for gracilis functioning free muscle transplantation in brachial plexus injury. *Clinics (Sao Paulo)* 2015;70:544–9.
- [61] Sechachalam S, O’Byrne A, MacQuillan A. Free Functional Muscle Transfer Tendon Insertion Secondary Advancement Procedure to Improve Elbow Flexion. *Tech Hand Up Extrem Surg* 2017;21: 8–12.
- [62] Chu B, Wang H, Chen L, et al. Dual Nerve Transfers for Restoration of Shoulder Function After Brachial Plexus Avulsion Injury. *Ann Plast Surg* 2016;76: 668–73.
- [63] Bhat DI, Indira Devi B, Bharti K, et al. Cortical plasticity after brachial plexus injury and repair: a resting-state functional MRI study. *Neurosurg Focus* 2017;42: E14.
- [64] Bertelli JA, Ghizoni MF. Results of spinal accessory to suprascapular nerve transfer in 110 patients with complete palsy of the brachial plexus. *J Neurosurg Spine* 2016;24:990–5.
- [65] Frueh FS, Ho M, Schiller A, et al. Magnetic Resonance Neurographic and Clinical Long-Term Results After Oberlin’s Transfer for Adult Brachial Plexus Injuries. *Ann Plast Surg* 2017;78:67–72.
- [66] Maldonado AA, Kircher MF, Spinner RJ, et al. Free Functioning Gracilis Muscle Transfer versus Intercostal Nerve Transfer to Musculocutaneous Nerve for Restoration of Elbow Flexion after Traumatic Adult Brachial Pan-Plexus Injury. *Plast Reconstr Surg* 2016;138:483e-488e.
- [67] Bertelli JA, Ghizoni MF, Tacca CP. Results of wrist extension reconstruction in C5-8 brachial plexus palsy by transferring the pronator quadratus motor branch to the extensor carpi radialis brevis muscle. *J Neurosurg* 2016;124:1442–9.

## Supplementary file 5. Included Studies

- 1  
2  
3 [68] Nicoson MC, Franco MJ, Tung TH. Donor nerve sources in free functional gracilis muscle  
4 transfer for elbow flexion in adult brachial plexus injury. *Microsurgery* 2017;37:377–82.  
5  
6 [69] Bhandari PS, Deb P. Use of contralateral spinal accessory nerve for ipsilateral suprascapular  
7 neurotization in global brachial plexus injury: A new technique. *J Neurosurg Spine* 2016;24:  
8 186–8.  
9  
10 [70] Maricq C, Jeunehomme M, Mouraux D, et al. Objective evaluation of elbow flexion strength  
11 and fatigability after nerve transfer in adult traumatic upper brachial plexus injuries. *Hand*  
12 *Surg* 2014;19:335–41.  
13  
14 [71] DeGeorge B, Becker H, Faryna J, et al. Outcomes of brachialis muscle transfer to restore finger  
15 flexion in traumatic lower trunk brachial plexus palsy. *J Hand Surg Am* 2017;42:S33–4.  
16  
17 [72] Liu Y, Lao J, Gao K, et al. Functional outcome of nerve transfers for traumatic global brachial  
18 plexus avulsion. *Injury* 2013;44:655–60.  
19  
20 [73] Bertelli JA, Ghizoni MF. Transfer of a flexor digitorum superficialis motor branch for wrist  
21 extension reconstruction in C5-C8 root injuries of the brachial plexus: a case series.  
22 *Microsurgery* 2013;33:39–42.  
23  
24 [74] Gao K, Lao J, Zhao X, et al. Outcome after transfer of intercostal nerves to the nerve of triceps  
25 long head in 25 adult patients with total brachial plexus root avulsion injury. *J Neurosurg*  
26 2013;118:606–10.  
27  
28 [75] Foroni L, Siqueira MG, Martins RS, et al. Good sensory recovery of the hand in brachial plexus  
29 surgery using the intercostobrachial nerve as the donor. *Arq Neuropsiquiatr* 2017;75:796–  
30 800.  
31  
32 [76] Socolovsky M, di Masi G, Bonilla G, et al. The phrenic nerve as a donor for brachial plexus  
33 injuries: is it safe and effective? Case series and literature analysis. *Acta Neurochir (Wien)*  
34 2015;157:1077–86.  
35  
36 [77] Hattori Y, Doi K, Sakamoto S, et al. Complete avulsion of brachial plexus with associated  
37 vascular trauma: feasibility of reconstruction using the double free muscle technique. *Plast*  
38 *Reconstr Surg* 2013;132:1504–12.  
39  
40 [78] Kachramanoglou C, Carlstedt T, Koltzenburg M, et al. Long-Term Outcome of Brachial Plexus  
41 Reimplantation After Complete Brachial Plexus Avulsion Injury. *World Neurosurg*  
42 2017;103:28–36.  
43  
44 [79] Kodama N, Doi K, Hattori Y. Force recovery assessment of functioning free muscle transfers  
45 using ultrasonography. *J Hand Surg Am* 2014;39:2269–76.  
46  
47 [80] Goubier J, Teboul F. Rhomboid nerve transfer to the suprascapular nerve for shoulder  
48 reanimation in brachial plexus palsy: A clinical report. *Hand Surg Rehabil* 2016;35:363–6.  
49  
50 [81] Gao K, Lao J, Zhao X, et al. Outcome of contralateral C7 transfer to two recipient nerves in 22  
51 patients with the total brachial plexus avulsion injury. *Microsurgery* 2013;33:605–11.  
52  
53 [82] Liu Y, Lao J, Zhao X. Comparative study of phrenic and intercostal nerve transfers for elbow  
54 flexion after global brachial plexus injury. *Injury* 2015;46:671–5.  
55  
56 [83] Li XM, Yang JT, Hou Y, et al. Donor-side morbidity after contralateral C-7 nerve transfer:  
57 results at a minimum of 6 months after surgery. *J Neurosurg* 2016;124:1434–41  
58  
59 [84] Rasulic L, Savic A, Zivkovic B, et al. Outcome after brachial plexus injury surgery and impact on  
60

## Supplementary file 5. Included Studies

- 1  
2  
3 quality of life. *Acta Neurochir (Wien)* 2017;159:1257–64  
4
- 5 [85] Yang J, Jia X, Yu C, et al. Pronator teres branch transfer to the anterior interosseous nerve for  
6 treating C8T1 brachial plexus avulsion: An anatomic study and case report. *Neurosurgery*  
7 2014;75:375–9.  
8
- 9 [86] Stiasny J, Birkeland P, J. S. Operative treatment with nerve repair can restore function in  
10 patients with traction injuries in the brachial plexus. *Dan Med J* 2015;62.  
11
- 12 [87] Soldado F, Ghizoni MF, Bertelli J, et al. Thoracodorsal nerve transfer for triceps reinnervation  
13 in partial brachial plexus injuries. *Microsurgery* 2016;36:191–7.  
14
- 15 [88] Thakkar UG, Vanikar A V, Trivedi HL. Co-infusion of autologous adipose tissue derived  
16 neuronal differentiated mesenchymal stem cells and bone marrow derived hematopoietic  
17 stem cells, a viable therapy for post-traumatic brachial plexus injury: a case report. *Biomed J*  
18 2014;37:237–40.  
19
- 20 [89] Emamhadi M, Alijani B, Andalib S, et al. Long-term clinical outcomes of spinal accessory nerve  
21 transfer to the suprascapular nerve in patients with brachial plexus palsy. *Acta Neurochir*  
22 *(Wien)* 2016;158:1801–6.  
23
- 24 [90] Tu YK, Tsai YJ, Chang CH et al. Surgical treatment for total root avulsion type brachial plexus  
25 injuries by neurotization: a prospective comparison study between total and  
26 hemicontralateral C7 nerve root transfer. *Microsurgery* 2014;34:91–101.  
27
- 28 [91] Qiu YQ, Hua XY, Zuo CT et al. Deactivation of distant pain-related regions induced by 20-day  
29 rTMS: a case study of one-week pain relief for long-term intractable deafferentation pain.  
30 *Pain Physician* 2014;17:E99–105.  
31
- 32 [92] Haninec P, Mencil L, Kaiser R. End-to-side neuroorrhaphy in brachial plexus reconstruction. *J*  
33 *Neurosurg* 2013;119:689–94.  
34
- 35 [93] Flores LP. Reanimation of elbow extension with medial pectoral nerve transfer in partial  
36 injuries to the brachial plexus. *J Neurosurg* 2013;118:588–93.  
37
- 38 [94] Mohammad-Reda A. Early post-operative results after repair of traumatic brachial plexus  
39 palsy. *Turk Neurosurg* 2013;23:1–9.  
40
- 41 [95] van der Lingen MAJ, de Joode SGJ, Schotanus MGM, et al. Satisfied patients after shoulder  
42 arthrodesis for brachial plexus lesions even after 20 years of follow-up. *Eur J Orthop Surg*  
43 *Traumatol* 2018;28:1089–94  
44
- 45 [96] Klika BJ, Spinner RJ, Bishop AT et al. Posterior branch of the axillary nerve transfer to the  
46 lateral triceps branch for restoration of elbow extension: case report. *J Hand Surg Am*  
47 2013;38:1145–9.  
48
- 49 [97] Liu J, Wang X, Zhang S, et al. A clinical analysis of repairing the whole brachial plexus nerve  
50 root avulsion by transferring C7 nerve root from the uninjured side. *J Neurol Sci* 2014;31:521–  
51 31.  
52
- 53 [98] Cambon-Binder A, Walch A, Marchei P et al. Bipolar transfer of the pectoralis major muscle  
54 for restoration of elbow flexion in 29 cases. *J Shoulder Elb Surg* 2018;27:e330-e336  
55
- 56 [99] Soldado F, Ghizoni MF, Bertelli J. Thoracodorsal nerve transfer for elbow flexion  
57 reconstruction in infraclavicular brachial plexus injuries. *J Hand Surg Am* 2014;39:1766–70.  
58
- 59 [100] Cho A, Paulos R, De Resende M, et al. Median nerve fascicle transfer versus ulnar nerve  
60

## Supplementary file 5. Included Studies

- 1  
2  
3 fascicle transfer to the biceps motor branch in C5-C6 and C5-C7 brachial plexus injuries:  
4 nonrandomized prospective study of 23 consecutive patients. *Microsurgery* 2014;34:511–5.  
5
- 6 [101] Kaizawa Y, Kakinoki R, Ohta S, et al. Free functional muscle transplantation of an anomalous  
7 femoral adductor with a very large muscle belly: A case report. *J Brachial Plex Peripher Nerve*  
8 *Inj* 2013;8:11.  
9
- 10 [102] Tuohuti T, Yu Q, Yang J, et al. Selective neurotization of the radial nerve in the axilla using  
11 intercostal nerve to treat complete brachial plexus palsy. *Int J Clin Exp Med* 2016;9:22880–5.  
12
- 13 [103] Flores LP. Objective Predictors of Functional Recovery Associated with Intercostal Nerves  
14 Transfer for Triceps Reinnervation in Global Brachial Plexus Palsy. *Brazilian Neurosurg*  
15 2016;35:271–8.  
16
- 17 [104] Emamhadi M. Nerve transfer to relieve pain in upper brachial plexus injuries: Does it work?  
18 *Clin Neurol Neurosurg* 2017;163:67–70.  
19
- 20 [105] Abdixbir A, Li P, Ilhamjan U, et al. Phrenic nerve transfer versus intercostal nerve transfer for  
21 the repair of brachial plexus root avulsion injuries. *Chinese J Tissue Eng Res* 2016;20:7660–5.  
22
- 23 [106] Limthongthang R, Vathana T, Wongtrakul S, et al. End-to-Side Neurotomy to Restore Elbow  
24 Flexion in Brachial Plexus Injury. *J Med Assoc Thai* 2016;99:1203–8.  
25
- 26 [107] De Oliveira C, Da Silva Melo D, et al. Chordata method combined with electrotherapy in  
27 functional recovery after brachial plexus injury: Report of three clinical cases. *Sci Med (Porto*  
28 *Alegre)* 2016;26:22425.  
29
- 30 [108] Xu B, Dong Z, Zhang CG, et al. Clinical outcome following transfer of the supinator motor  
31 branch to the posterior interosseous nerve in patients with C7-T1 brachial plexus palsy. *J*  
32 *Reconstr Microsurg* 2015;31:102–6.  
33
- 34 [109] Wu X, Cong XB, Huang QS, et al. Transposition of branches of radial nerve innervating  
35 supinator to posterior interosseous nerve for functional reconstruction of finger and thumb  
36 extension in 4 patients with middle and lower trunk root avulsion injuries of brachial plexus. *J*  
37 *Huazhong Univ Sci Technolog Med Sci* 2017;37:933–7.  
38
- 39 [110] Kazamel M, Sorenson EJ. Electromyographic Findings in Gracilis Muscle Grafts Used to  
40 Augment Elbow Flexion in Traumatic Brachial Plexopathy. *J Clin Neurophysiol* 2016;33:549–  
41 53.  
42
- 43 [111] Li Z, Reynolds M, Satteson E, et al. Double Distal Intraneural Fascicular Nerve Transfers for  
44 Lower Brachial Plexus Injuries. *J Hand Surg Am* 2016;41:e15-9.  
45
- 46 [112] Arnal M, Cambon A, Marcheix P. Restoration of elbow and hand function in total brachial  
47 plexus palsy with intercostal nerves and C5 root neurotization. Results in 21 patients. *Hand*  
48 *Surg Rehabil* 2016;35:283–7.  
49
- 50 [113] Jiang Y, Lao J. The phrenic nerve transfer in the treatment of a septuagenarian with brachial  
51 plexus avulsion injury: a case report. *Int J Neurosci* 2018;128:467–71.  
52
- 53 [114] Flores LP. Outcomes of Transferring a Healthy Motor Fascicle From the Radial Nerve to a  
54 Branch for the Triceps to Recover Elbow Extension in Partial Brachial Plexus Palsy.  
55 *Neurosurgery* 2017;80:448–53.  
56
- 57 [115] Johnsen PH, Wolfe SW. Successful Nerve Transfers for Traumatic Brachial Plexus Palsy in a  
58 Septuagenarian: A Case Report. *Hand (N Y)* 2016;11:NP30–3.  
59  
60

## Supplementary file 5. Included Studies

- 1  
2  
3 [116] Maldonado AA, Romero-Brufau S, Kircher MF, et al. Free Functioning Gracilis Muscle Transfer  
4 for Elbow Flexion Reconstruction after Traumatic Adult Brachial Pan-Plexus Injury: Where Is  
5 the Optimal Distal Tendon Attachment for Elbow Flexion? *Plast Reconstr Surg* 2017;139: 128–  
6 36.  
7  
8 [117] Bhandari PS. Results of Distal Nerve Transfers in Restoration of Shoulder Function in C5 and  
9 C6 Root Avulsion Injury to the Brachial Plexus. *Indian J Neurotrauma* 2017;14:21–5.  
10  
11 [118] Watanabe M, Yamamoto T, Fukaya C, et al. Bipolar dual-lead spinal cord stimulation between  
12 two electrodes on the ventral and dorsal sides of the spinal cord: consideration of putative  
13 mechanisms. *Acta Neurochir (Wien)* 2018;160:639–43.  
14  
15 [119] Al-Qattan M, Kattan A, Al-Qahtany B et al. Triceps nerve to deltoid nerve transfer after an  
16 unsatisfactory intra-plexus neurotization of the posterior division of the upper trunk. *Int J*  
17 *Surg Case Rep* 2017;37:124–6.  
18  
19 [120] Alrabai H, Gesheff G, Hammouda A, et al. Trapezius Muscle Transfer for Restoration of Elbow  
20 Extension in a Traumatic Brachial Plexus Injury. *J Hand Surg Am* 2018;43:872.  
21  
22 [121] Bertelli JA. Transfer of the radial nerve branch to the extensor carpi radialis brevis to the  
23 anterior interosseous nerve to reconstruct thumb and finger flexion. *J Hand Surg Am*  
24 2015;40:323-328.  
25  
26 [122] Magistrini E, Ciclamini D, Panero B. Ultrasound-guided pulse-dose radiofrequency:  
27 Treatment of neuropathic pain after brachial plexus lesion and arm revascularization. *Case*  
28 *Rep Med* 2014;201:429618.  
29  
30 [123] Liu Y, Xu X, Zou Y, et al. Phrenic nerve transfer to the musculocutaneous nerve for the repair  
31 of brachial plexus injury: Electrophysiological characteristics. *Neural Regen Res* 2015;10:328–  
32 33.  
33  
34 [124] Le Hanneur M, Walch A, Gerosa T et al. Postoperative motor deficits following elbow flexion  
35 reanimation by nerve transfer. *Hand Surg Rehabil* 2018;37:289-294  
36  
37 [125] Liu Y, Zhuang Y, Yu H, et al. Comparative study of phrenic and partial ulnar nerve transfers for  
38 elbow flexion after upper brachial plexus avulsion: A retrospective clinical analysis. *J Plast*  
39 *Reconstr Aesthetic Surg* 2018;71:1245–51.  
40  
41 [126] Yavari M, Mahmoudvand H, Nadri S. Contralateral medial pectoral nerve transfer with free  
42 gracilis muscle transfer in old brachial plexus palsy. *J Surg Res* 2018;231:94–8.  
43  
44 [127] Yanagisawa T, Fukuma R, Seymour B, et al. MEG-BMI to control phantom limb pain. *Neurol*  
45 *Med Chir (Tokyo)* 2018;58:327–33.  
46  
47 [128] Choong C, Shalimar A. Complete brachial plexus injury - An amputation dilemma. A case  
48 report. *Malaysian Orthop J* 2015;9:52–4.  
49  
50 [129] Tsao J, Finn S. Reversal of phantom pain and hand-to-face remapping after brachial plexus  
51 avulsion. *Ann Clin Transl Neurol* 2016;3:463–4..  
52  
53 [130] Kubota S, Hara Y, Shimizu Y, et al. A newly developed upper limb single-joint HAL in a patient  
54 with elbow flexion reconstruction after traumatic brachial plexus injury: A case report.  
55 *Interdiscip Neurosurg Adv Tech Case Manag* 2017;10:66–8.  
56  
57 [131] Bertelli JA. Free Reverse Gracilis Muscle Combined With Steindler Flexorplasty for Elbow  
58 Flexion Reconstruction After Failed Primary Repair of Extended Upper-Type Paralysis of the  
59 Brachial Plexus. *J Hand Surg Am* 2019;44:112-120  
60

## Supplementary file 5. Included Studies

- 1  
2  
3 [132] Xu B, Dong Z, Zhang C. Multiple nerve and tendon transfers: A new strategy for restoring  
4 hand function in a patient with C7-T1 brachial plexus avulsions. *J Neurosurg* 2017;127:837–  
5 42.  
6  
7 [133] Cole T, Nicks R, Ferris S et al. Outcomes after occupational therapy intervention for traumatic  
8 brachial plexus injury: A prospective longitudinal cohort study. *Journal of Hand Therapy*.  
9 2020;33:528-539  
10  
11 [134] Crepaldi BE, Neto JQL, Rezende MR et al. *Hand*.2019;14(2):179-186  
12  
13 [135] Hruby LA, Gstoettner C, Sturma A et al. *Journal of Clinical Medicine*. 2020;9(23):1-14  
14  
15 [136] Ferreira CM, de Carvalho CD, Gomes R et al. Transcranial direct current stimulation and  
16 mirror therapy for neuropathic pain after brachial plexus avulsion: A randomised double-  
17 blind, controlled pilot study. *Frontiers in Neurology*. 2020;11:1-10  
18  
19 [137] Razak I, Chung TY, Ahmad S et al. A comparative study of two modalities in pain  
20 management of patients presenting with chronic brachial neuralgia. *Journal of Alternative*  
21 *and Complementary Medicine*. 2019;1-7  
22  
23 [138] Martins-Filho FVF, de Carmo Iwase F, Silva GB et al. Do technical components of  
24 microanastomosis influence the functional outcome of free gracilis muscle transfer for elbow  
25 flexion in traumatic brachial plexus injury? *Orthopaedics & Traumatology: Surgery &*  
26 *Research*.2021;107:1-5  
27  
28  
29  
30  
31  
32  
33  
34  
35  
36  
37  
38  
39  
40  
41  
42  
43  
44  
45  
46  
47  
48  
49  
50  
51  
52  
53  
54  
55  
56  
57  
58  
59  
60



**Supplementary file 6: Unique outcomes mapped to potential domains and core areas according to COMET**

**Online Supplementary file 4. Table: Unique outcomes mapped to potential domains and core areas according to COMET(Dodd et al., 2018)**

| Outcomes ( n=157)                  | Subdomains                    | Domains                                      | Core Areas             |
|------------------------------------|-------------------------------|----------------------------------------------|------------------------|
| Isometric muscle strength          | Muscle strength/function      | Musculoskeletal and connective tissue domain | Physiological/Clinical |
| Concentric strength                |                               |                                              |                        |
| Eccentric strength                 |                               |                                              |                        |
| Muscle flicker/contraction         |                               |                                              |                        |
| Anti-gravity muscle activity       |                               |                                              |                        |
| Muscle endurance                   |                               |                                              |                        |
| Muscle fatigue                     |                               |                                              |                        |
| Muscle torque                      |                               |                                              |                        |
| Active range of movement           | Active movement               |                                              |                        |
| Perception of movement             |                               |                                              |                        |
| Antigravity movement               |                               |                                              |                        |
| Independent movement without donor |                               |                                              |                        |
| Passive range of movement          | Passive movement              |                                              |                        |
| Movement control/stability         | Control of movement/stability |                                              |                        |
| Muscle mass                        | Muscle mass                   |                                              |                        |
| Bony union                         | Bone structure/position       |                                              |                        |
| Joint position                     |                               |                                              |                        |
| Joint stability                    |                               |                                              |                        |
| General sensory recovery           | General sensory recovery      | Nervous system                               |                        |
| Feeling of numbness                |                               |                                              |                        |
| Proprioception                     |                               |                                              |                        |
| Light touch                        | Discriminative touch          |                                              |                        |
| 2 PD                               |                               |                                              |                        |

1

**Supplementary file 6: Unique outcomes mapped to potential domains and core areas according to COMET**

|                                                 |                                         |                           |  |
|-------------------------------------------------|-----------------------------------------|---------------------------|--|
| Vibration                                       |                                         |                           |  |
| Object recognition                              |                                         |                           |  |
| Pain                                            | Protective touch                        |                           |  |
| Temperature                                     |                                         |                           |  |
| Deep pressure                                   |                                         |                           |  |
| Brachial plexus structure                       | Peripheral nervous system structure     |                           |  |
| Level of reinnervation                          | Reinnervation                           |                           |  |
| Time to reinnervation                           |                                         |                           |  |
| Progression of regeneration                     | Progression of regeneration             |                           |  |
| Speed of motor sensory conduction               | Speed of motor and sensory conduction   |                           |  |
| Pain intensity                                  | Pain intensity/relief                   | General outcomes/symptoms |  |
| Pain relief / reduction                         |                                         |                           |  |
| Pain duration                                   | Pain duration/frequency                 |                           |  |
| Pain frequency                                  |                                         |                           |  |
| Pain quality                                    | Pain quality and interference with life |                           |  |
| Pain interference with walking                  |                                         |                           |  |
| Pain interference in mood                       |                                         |                           |  |
| Pain interference with work                     |                                         |                           |  |
| Pain interference in activities of daily living |                                         |                           |  |
| Pain interference with relationships            |                                         |                           |  |
| Pain interference with enjoyment of life        |                                         |                           |  |
| Pain interference with sleep                    |                                         |                           |  |
| Sensitivity to cold                             | Pain when arm exposed to cold           |                           |  |
| Paraesthesia                                    | Paraesthesia and itchiness              |                           |  |
| Itchiness                                       |                                         |                           |  |

**Supplementary file 6: Unique outcomes mapped to potential domains and core areas according to COMET**

|                                      |                                                       |                  |  |                      |             |
|--------------------------------------|-------------------------------------------------------|------------------|--|----------------------|-------------|
| Sensitivity to pressure              | Sensitivity to touch, pressure etc                    |                  |  |                      |             |
| Sensitivity to touch                 |                                                       |                  |  |                      |             |
| Pain location                        | Location of pain                                      |                  |  |                      |             |
| Pain relief from medication          | Pain medication use                                   |                  |  |                      |             |
| Stiffness                            | Stiffness                                             |                  |  |                      |             |
| Impact on general sleep              | Impact on sleep                                       |                  |  |                      |             |
| Impact on sleep on affected side     |                                                       |                  |  |                      |             |
| Frequency sleep disturbed by injury  |                                                       |                  |  |                      |             |
| General physical function            | Physical function non-specific                        |                  |  | Physical functioning | Life Impact |
| Patient led functional outcome       |                                                       |                  |  |                      |             |
| Walking short distance               | Lower limb and non -upper limb function               |                  |  |                      |             |
| Balance                              |                                                       |                  |  |                      |             |
| Running                              |                                                       |                  |  |                      |             |
| Climbing stairs                      |                                                       |                  |  |                      |             |
| Bending                              |                                                       |                  |  |                      |             |
| Kneeling                             |                                                       |                  |  |                      |             |
| Reaching                             | Reaching, pulling, pushing, carrying etc              |                  |  |                      |             |
| Pulling                              |                                                       |                  |  |                      |             |
| Pushing                              |                                                       |                  |  |                      |             |
| Carrying                             |                                                       |                  |  |                      |             |
| Throwing                             |                                                       |                  |  |                      |             |
| Lifting                              |                                                       |                  |  |                      |             |
| General function of arm              | Turning twisting, gripping and releasing with the arm |                  |  |                      |             |
| Turning and twisting arm             |                                                       |                  |  |                      |             |
| Grip and release                     |                                                       |                  |  |                      |             |
| Pinching                             |                                                       |                  |  |                      |             |
| Fine hand movement (writing/buttons) | Fine hand movement including writing                  |                  |  |                      |             |
| Returning to work                    | Impact on paid or unpaid work or role in education    | Role functioning |  |                      |             |
| Ability to do work                   |                                                       |                  |  |                      |             |
| Usual time at work                   |                                                       |                  |  |                      |             |
| Type of work                         |                                                       |                  |  |                      |             |

**Supplementary file 6: Unique outcomes mapped to potential domains and core areas according to COMET**

|                                                            |                                                                                     |                              |  |
|------------------------------------------------------------|-------------------------------------------------------------------------------------|------------------------------|--|
| Usual school activities                                    |                                                                                     |                              |  |
| General rating to perform a patient specific activity      | Role function - patient specific                                                    |                              |  |
| Impact on ADL (general)                                    | Carrying out daily routine, (including food preparation, housework, garden, plants) |                              |  |
| Return to ADL (general)                                    |                                                                                     |                              |  |
| Impact on food preparation and feeding                     |                                                                                     |                              |  |
| Housework (washing, cleaning, ironing, folding, vacuuming) |                                                                                     |                              |  |
| Gardening (Includes indoor plants)                         |                                                                                     |                              |  |
| Using a phone                                              |                                                                                     |                              |  |
| Maintaining personal hygiene                               |                                                                                     |                              |  |
| Maintaining personal appearance (grooming hair)            |                                                                                     | Maintaining personal hygiene |  |
| Dressing                                                   | Maintaining personal appearance                                                     |                              |  |
| Transport needs (e.g driving)                              | Dressing                                                                            |                              |  |
| Impact on normal hobbies                                   | Transport needs                                                                     |                              |  |
| Time doing normal hobbies                                  | Impact on recreational activities and sport                                         |                              |  |
| Playing instrument in usual way                            |                                                                                     |                              |  |
| Ability to play instrument                                 |                                                                                     |                              |  |
| Impact on time spent playing instrument                    |                                                                                     |                              |  |
| Impact on time spent doing sport                           |                                                                                     |                              |  |
| Impact on participation in sport                           |                                                                                     |                              |  |
| Social activities with friends                             | Effect on relationship with                                                         | Social functioning           |  |

**Supplementary file 6: Unique outcomes mapped to potential domains and core areas according to COMET**

|                                              |                                        |                        |                  |                                           |
|----------------------------------------------|----------------------------------------|------------------------|------------------|-------------------------------------------|
| Social activities with neighbours            | family, friends, neighbours and groups |                        |                  |                                           |
| Social activities with family                |                                        |                        |                  |                                           |
| Social activities with groups                |                                        |                        |                  |                                           |
| Dependence on family and friends             |                                        |                        |                  |                                           |
| Appearance interferes with social activities |                                        |                        |                  |                                           |
| Intimate relationships                       | Effect on intimate relationships       |                        |                  |                                           |
| Emotional impact on work                     | Emotional distress/mood                | Emotional functioning  |                  |                                           |
| Energy levels                                |                                        |                        |                  |                                           |
| Emotional impact on ADL                      |                                        |                        |                  |                                           |
| Happiness                                    |                                        |                        |                  |                                           |
| Impact on life enjoyment / satisfaction      |                                        |                        |                  |                                           |
| Emotional impact on relationships            |                                        |                        |                  |                                           |
| Anxiety                                      |                                        |                        |                  |                                           |
| Depression                                   |                                        |                        |                  |                                           |
| Acceptance/ Adjustment                       |                                        |                        |                  | Thoughts and beliefs (acceptance, coping) |
| Coping with trauma                           |                                        |                        |                  |                                           |
| Confidence                                   | Self esteem and confidence             |                        |                  |                                           |
| Self esteem                                  |                                        |                        |                  |                                           |
| Body image                                   |                                        | Body image             |                  |                                           |
| Quality of life                              | Quality of Life                        | Global Quality of Life | Quality of Life  |                                           |
| Rating of health                             | Perceived Health status                | Health status          | Health status    |                                           |
| General patient satisfaction                 | Patient satisfaction                   | Delivery of Care       | Delivery of Care |                                           |
| Satisfaction with appearance of arm          |                                        |                        |                  |                                           |
| Satisfaction with function                   |                                        |                        |                  |                                           |
| Satisfaction with movement                   |                                        |                        |                  |                                           |
| Satisfaction with strength                   |                                        |                        |                  |                                           |

**Supplementary file 6: Unique outcomes mapped to potential domains and core areas according to COMET**

|                              |                                                     |                |                |
|------------------------------|-----------------------------------------------------|----------------|----------------|
| Satisfaction with pain       |                                                     |                |                |
| Satisfaction with colour     |                                                     |                |                |
| Satisfaction with shape      |                                                     |                |                |
| Satisfaction with feeling    |                                                     |                |                |
| Satisfaction with procedure  |                                                     |                |                |
| Patient preference           | Patient preference                                  |                |                |
| Quality of intervention      | Accessibility, quality and adequacy of intervention |                |                |
| Time to surgery              | Time to surgery                                     |                |                |
| Operation time               | Operation time                                      | Resource Use   | Resource Use   |
| Motor morbidity              | Donor site morbidity                                | Adverse Events | Adverse Events |
| Sensory morbidity            |                                                     |                |                |
| Pain                         |                                                     |                |                |
| General complications        | General complications                               |                |                |
| Pneumothorax                 | Respiratory complications                           |                |                |
| Respiratory function         |                                                     |                |                |
| Respiratory symptoms         |                                                     |                |                |
| Pneumonia                    |                                                     |                |                |
| Arterial thrombosis          | Vascular complications                              |                |                |
| Venous thrombosis            |                                                     |                |                |
| Haematoma                    |                                                     |                |                |
| Venous spasm                 |                                                     |                |                |
| Iatrogenic vascular injury   |                                                     |                |                |
| Vascularity of flap          |                                                     |                |                |
| Swelling                     |                                                     |                |                |
| Fracture                     | Musculoskeletal complications                       |                |                |
| Passive range of motion loss |                                                     |                |                |
| Co-contraction               |                                                     |                |                |
| Bowstringing                 |                                                     |                |                |
| Failure of tendon attachment |                                                     |                |                |
| Joint Instability            |                                                     |                |                |
| Scapula crepitus             |                                                     |                |                |

**Supplementary file 6: Unique outcomes mapped to potential domains and core areas according to COMET**

|                         |                         |  |  |
|-------------------------|-------------------------|--|--|
| Infection complications | Infection complications |  |  |
|-------------------------|-------------------------|--|--|

Dodd, S. et al. A taxonomy has been developed for outcomes in medical research to help improve knowledge discovery. *Journal of clinical epidemiology*. 2018, 96: 84–92.

For peer review only

## Supplementary file 7. Measurement instruments mapped to domains

### Supplementary file 7. Measurement instruments mapped to domains

56 outcome subdomains in 4 core areas (Physiological/clinical, Life Impact, Resource Use and Adverse events) and within the following COMET domains

Musculoskeletal/connective tissue, Nervous system outcome domain, General outcome and symptom domain, Physical functioning, Role functioning, Emotional functioning, Global quality of life, Perceived health status, Delivery of care, Hospital resources and Adverse Events

| Core Area               | Outcome subdomains                       | Measurement type used (N) |                            |                     |           | Measurement instruments used (number of studies)                                                                                                                                                                                                                                                                                                                                                                                                                                                                                                                                                                                                                                                                                                                                                             |
|-------------------------|------------------------------------------|---------------------------|----------------------------|---------------------|-----------|--------------------------------------------------------------------------------------------------------------------------------------------------------------------------------------------------------------------------------------------------------------------------------------------------------------------------------------------------------------------------------------------------------------------------------------------------------------------------------------------------------------------------------------------------------------------------------------------------------------------------------------------------------------------------------------------------------------------------------------------------------------------------------------------------------------|
|                         |                                          | Patient reported Outcome  | Clinician reported Outcome | Performance Outcome | Not Clear |                                                                                                                                                                                                                                                                                                                                                                                                                                                                                                                                                                                                                                                                                                                                                                                                              |
| PHYSIOLOGICAL /CLINICAL | <b>Musculoskeletal/connective tissue</b> |                           |                            |                     |           |                                                                                                                                                                                                                                                                                                                                                                                                                                                                                                                                                                                                                                                                                                                                                                                                              |
|                         | Muscle strength                          | 31                        | 131                        | 20                  | 3         | DASH (n= 28), UEFI (n=2), MHQ (n=1)<br><br><b>Manual Muscle Testing</b><br><b>Manual muscle testing undefined (n=5)</b><br><b>MRC muscle grading (n=62, including UCLA)</b><br><b>MRC muscle grading modified (n= 24)</b><br><i>MRC modified</i> , unclear how (n= 6)<br><i>MRC modified</i> , grade 3 active must equal passive (n=2)<br><i>MRC modified</i> , grade 2 active must equal passive movement (n=2)<br><i>MRC modified</i> , M3+ contraction with resistance against a finger for less than 30 seconds, M4 contraction of resistance against a finger against a finger for more than 30 seconds (n=1)<br><i>MRC modified</i> : M0, M1+, M1, M1+, M2-, M2, M2+,M3-, M3, M3+, M4-, M4, M4+, M5-, M5 (n=6)<br><i>MRC modified</i> , Finger flexion tested with wrist extended 20-30 degrees ( n=1) |



Supplementary file 7. Measurement instruments mapped to domains

1  
2  
3  
4  
5  
6  
7  
8  
9  
10  
11  
12  
13  
14  
15  
16  
17  
18  
19  
20  
21  
22  
23  
24  
25  
26  
27  
28  
29  
30  
31  
32  
33  
34  
35  
36  
37  
38  
39  
40  
41  
42  
43  
44  
45  
46

For peer review only

|  |  |  |  |  |                                                                                                                                                                                                                                                                                                                                                                                                                                                                                                                                                                                                                                                                                                                                                                                                                                                                                                                                                                                                                                                                                                                                                                                                                                                                                                                                                                                                                                                                                                                                                                                                                                                                                                                |
|--|--|--|--|--|----------------------------------------------------------------------------------------------------------------------------------------------------------------------------------------------------------------------------------------------------------------------------------------------------------------------------------------------------------------------------------------------------------------------------------------------------------------------------------------------------------------------------------------------------------------------------------------------------------------------------------------------------------------------------------------------------------------------------------------------------------------------------------------------------------------------------------------------------------------------------------------------------------------------------------------------------------------------------------------------------------------------------------------------------------------------------------------------------------------------------------------------------------------------------------------------------------------------------------------------------------------------------------------------------------------------------------------------------------------------------------------------------------------------------------------------------------------------------------------------------------------------------------------------------------------------------------------------------------------------------------------------------------------------------------------------------------------|
|  |  |  |  |  | <p>MRC modified, Addition of M4.5 ( n=1)</p> <p>MRC modified, graded two muscles together (n=1)</p> <p>MRC modified, finger extension tested with wrist extension at 20-30 degrees ( n=1)</p> <p>MRC modified, summated muscle score (n=1)</p> <p>MRC modified, FDS tested by stabilising LF and IF to table and testing MF and RF IP flexion (n=1)</p> <p>Lovett &amp; Sunderlands standardisation (n=1)</p> <p><b>Other manual muscle tests ( n=3)</b></p> <p>Kendall and McCreary testing procedure (n=1)</p> <p>Oxford muscle testing (n=1)</p> <p>Modification of the Louisiana State University Medical Centre grading system (n=1)</p> <p><b>Time to (n= 12)</b></p> <p>contraction (n=7); M2 ( n=1); strength greater than or equal to M3 (n=1); M 3 (n=1); greater than or equal to modified M3 ( n=1); Time to improvement in MRC scale (n= 1)</p> <p><b>Dynamometry (n=23)</b></p> <p>Dynanometry – isokinetic machine, undefined method (n =1)</p> <p>Grip strength JAMAR , undefined method (n=4); Hook grip – isokinetic machine, undefined method (n=1); Grip strength JAMAR, mean of 3 trials n=2); Grip strength , PABLO system, undefined (n=1); Pinch grip, JAMAR, undefined (n= 3), Pinch grip JAMAR, mean 3 trials (n= 1); Peak isometric, hand held dynamometer (n=2); Isometric strength , hand held dynamometer, best of 3 trials (n=1); Isometric strength , Kendall &amp; Kendall positions, 3 trials mean value (n=1); Measurement on digital scales after 5 seconds (n=1)</p> <p>Concentric strength through range, Isokinetics (n=1)</p> <p>Eccentric strength through range, isokinetics (n=1)</p> <p>Combined action of using elbow and hand on digital hanging scale (n=1)</p> |
|--|--|--|--|--|----------------------------------------------------------------------------------------------------------------------------------------------------------------------------------------------------------------------------------------------------------------------------------------------------------------------------------------------------------------------------------------------------------------------------------------------------------------------------------------------------------------------------------------------------------------------------------------------------------------------------------------------------------------------------------------------------------------------------------------------------------------------------------------------------------------------------------------------------------------------------------------------------------------------------------------------------------------------------------------------------------------------------------------------------------------------------------------------------------------------------------------------------------------------------------------------------------------------------------------------------------------------------------------------------------------------------------------------------------------------------------------------------------------------------------------------------------------------------------------------------------------------------------------------------------------------------------------------------------------------------------------------------------------------------------------------------------------|

Supplementary file 7. Measurement instruments mapped to domains

|  |  |  |  |  |                                                                                                                                                                                                                                                                                                                                                                                                                                                                                                                                                                                                                                                                                                                                                                                                                                                                                                                                                                                                                                                                                                                                                                                                                                                                                                                                                                                                                                               |
|--|--|--|--|--|-----------------------------------------------------------------------------------------------------------------------------------------------------------------------------------------------------------------------------------------------------------------------------------------------------------------------------------------------------------------------------------------------------------------------------------------------------------------------------------------------------------------------------------------------------------------------------------------------------------------------------------------------------------------------------------------------------------------------------------------------------------------------------------------------------------------------------------------------------------------------------------------------------------------------------------------------------------------------------------------------------------------------------------------------------------------------------------------------------------------------------------------------------------------------------------------------------------------------------------------------------------------------------------------------------------------------------------------------------------------------------------------------------------------------------------------------|
|  |  |  |  |  | <p>Constant-Murley score: dynamometry 90 degrees abduction(n=2)</p> <p><b>Narakas score modified (one study)</b><br/>                 Thoaraco brachial grasp (n=1)<br/>                 Elbow flexion with weight (n=1)<br/>                 Elbow extension with weight (n=1)<br/>                 Wrist flexion with weight (n=1)<br/>                 Wrist extension with weight(n=1)<br/>                 Fist power with weight (n=1)<br/>                 Pinch power (n=1)</p> <p><b>ULM (one study)</b><br/>                 Shoulder flexion to shoulder height with 500g (n=1)<br/>                 Shoulder flexion above shoulder height with 500g (n=1)<br/>                 Shoulder flexion above shoulder with 1kg (n=1)<br/>                 Move weight on table (100g) (n=1)<br/>                 Move weight on table (500g) (n=1)<br/>                 Move weight on table (1KG) (n=1)</p> <p><b>SHAP (two studies)</b><br/>                 Grip strength (n=2)<br/>                 Pinch strength (n=2)<br/>                 Pinch grip (lateral) (n=2)<br/>                 Pinch grip (tip) (n=2)<br/>                 Grip strength (power) (n=2)<br/>                 Heavy extension (n=2)</p> <p>Ability to lift weight, undefined (n=1)<br/>                 Number of repetitions movement can be performed in 10 seconds (n=1)<br/>                 Maximum weight sustained when flexing elbow (n=1)</p> |
|--|--|--|--|--|-----------------------------------------------------------------------------------------------------------------------------------------------------------------------------------------------------------------------------------------------------------------------------------------------------------------------------------------------------------------------------------------------------------------------------------------------------------------------------------------------------------------------------------------------------------------------------------------------------------------------------------------------------------------------------------------------------------------------------------------------------------------------------------------------------------------------------------------------------------------------------------------------------------------------------------------------------------------------------------------------------------------------------------------------------------------------------------------------------------------------------------------------------------------------------------------------------------------------------------------------------------------------------------------------------------------------------------------------------------------------------------------------------------------------------------------------|

Supplementary file 7. Measurement instruments mapped to domains

|                                                                                             |   |     |   |    |  |                                                                                                                                                                                                                                                                                                                                                                                                                                                                                |
|---------------------------------------------------------------------------------------------|---|-----|---|----|--|--------------------------------------------------------------------------------------------------------------------------------------------------------------------------------------------------------------------------------------------------------------------------------------------------------------------------------------------------------------------------------------------------------------------------------------------------------------------------------|
|                                                                                             |   |     |   |    |  | <b>Unclear (n= 3)</b><br>Force recovery: Cross sectional area of the muscle under isometric contraction divided by cross sectional area at rest (n=1)                                                                                                                                                                                                                                                                                                                          |
| Active movement                                                                             | 5 | 105 | 4 | 63 |  | SST(n=1), MHQ (n=1), UCLA shoulder rating scale (n=1), MPI(n=2), CONSTANT- MURLEY(n=2) (2xPRO, 8x ClinRO), ARAT (PerfO, n=2), ULM (PerfO, n=2), Goniometry(n=50), MALLET (n=1), Visual assessment (n=32), First web space in cm (n=3), Total active movement(n=2), Pulp to palm distance (n=2) Months to full active movement (n=1) Months to antigravity movement (n=3) Months to initial movement (n= 1) Months to independent movement without donor (n=1) Not clear (n=63) |
| Passive range of movement                                                                   |   | 6   |   | 7  |  | Not defined (n=7), Goniometry(n=6)                                                                                                                                                                                                                                                                                                                                                                                                                                             |
| Movement control and stability                                                              |   | 1   | 1 | 2  |  | MPI (ClinRo, n=1), ULM (PerfO, n=1), Not clear (n=2)                                                                                                                                                                                                                                                                                                                                                                                                                           |
| Bone structure/position/healing                                                             |   |     |   | 4  |  | Not clear (n=4)                                                                                                                                                                                                                                                                                                                                                                                                                                                                |
| Muscle mass                                                                                 |   |     |   | 4  |  | Not clear(n=4)                                                                                                                                                                                                                                                                                                                                                                                                                                                                 |
| <b>Nervous system outcome subdomains</b>                                                    |   |     |   |    |  |                                                                                                                                                                                                                                                                                                                                                                                                                                                                                |
| General sensory recovery including proprioception                                           |   | 9   |   | 8  |  | Sensory BMRC (n=5), Modified Sensory BMRC (n= 2), Highet classification(n=2), Not clear (n=8)                                                                                                                                                                                                                                                                                                                                                                                  |
| Discriminative touch (light touch, two point discrimination, vibration, object recognition) | 1 | 14  |   |    |  | MHQ (n=1), Cotton wool (n=3), Semmes Weinstein Monofilaments (n=4), Two point discrimination( n=2), Tuning fork (n=4), Not defined (ClinRo, n=1)                                                                                                                                                                                                                                                                                                                               |
| Protective touch (pain, temperature, deep pressure)                                         |   | 3   |   | 7  |  | Blunt pin (n=3), Not clear (n=7)                                                                                                                                                                                                                                                                                                                                                                                                                                               |
| Structure of peripheral nervous system                                                      |   | 1   |   |    |  | MRI (n=1)                                                                                                                                                                                                                                                                                                                                                                                                                                                                      |
| Reinnervation (level of reinnervation, time to innervation)                                 |   | 54  |   |    |  | Two point scale on EMG(n=1) Four point scale on EMG (n=4), Not clear EMG (n= 49)                                                                                                                                                                                                                                                                                                                                                                                               |
| Progression of regeneration                                                                 |   | 5   |   |    |  | Tinel sign (n=5)                                                                                                                                                                                                                                                                                                                                                                                                                                                               |

## Supplementary file 7. Measurement instruments mapped to domains

|                    |                                                                                |    |   |   |   |                                                                                                                                                                                                                                                                                                                             |
|--------------------|--------------------------------------------------------------------------------|----|---|---|---|-----------------------------------------------------------------------------------------------------------------------------------------------------------------------------------------------------------------------------------------------------------------------------------------------------------------------------|
|                    | Speed of motor and sensory conduction                                          |    | 9 |   |   | EMG (n=9)                                                                                                                                                                                                                                                                                                                   |
|                    | <b>General outcomes / symptoms</b>                                             |    |   |   |   |                                                                                                                                                                                                                                                                                                                             |
|                    | Pain intensity/ relief                                                         | 81 |   |   | 3 | DASH (n=27), ASES (n=1), TAPES (n=1), VAS(n=20), NRS(n=12),MHQ (n=1) WBFERS(n=1), BPI (n= 4), UNWNS (n=1), McGill Pain Questionnaire SF (n=2), McGill pain questionnaire (n= 2), MPI (n=1), CONSTANT-MURLEY (n=2), 4 point scale (n=3) Author developed questionnaire(n=1), Not Clear (n=3), QuickDash (n=1), EQ5D 3L (n=1) |
|                    | Pain duration or frequency                                                     | 18 | 0 | 0 | 0 | SST (n=1), SF36 (n=8), MHQ (n=1),TAPES(n=1), NPSI (n=1), BPI (n= 4), UCLA shoulder rating score (n=1), Not described PRO (n=1)                                                                                                                                                                                              |
|                    | Pain quality                                                                   | 8  |   |   |   | TAPES (n= 1), NPSI(n=1), UWNS(n= 1), McGill SF(n=2), McGill (n=2), Non described PRO (n =1)                                                                                                                                                                                                                                 |
|                    | Pain when arm exposed to cold                                                  | 1  |   |   |   | NPSI (n=1)                                                                                                                                                                                                                                                                                                                  |
|                    | Paraesthesia                                                                   | 28 |   |   |   | DASH (n=27), QuickDash(n=1)                                                                                                                                                                                                                                                                                                 |
|                    | Sensitivity to touch, pressure, vibration etc                                  | 3  |   |   |   | NPSI (n=1) UWNS (n= 1), NRS (n=1)                                                                                                                                                                                                                                                                                           |
|                    | Location of pain                                                               | 4  |   |   |   | BPI (n=4)                                                                                                                                                                                                                                                                                                                   |
|                    | Pain medication use                                                            | 4  |   |   |   | BPI (n=4)                                                                                                                                                                                                                                                                                                                   |
|                    | Stiffness                                                                      | 27 |   |   |   | DASH (n=27)                                                                                                                                                                                                                                                                                                                 |
| <b>LIFE IMPACT</b> | <b>Physical functioning</b>                                                    |    |   |   |   |                                                                                                                                                                                                                                                                                                                             |
|                    | Physical function non-specific                                                 | 3  |   |   |   | PSFS (n=2), TAPES (n=1)                                                                                                                                                                                                                                                                                                     |
|                    | Lower limb and non-upper limb function (walking, running, climbing stairs etc) | 14 |   |   | 1 | SF36 (n=8), TAPES (n= 1), BPI (n=4) Non described PRO (n=1), EQ5D-3L (n=1)                                                                                                                                                                                                                                                  |
|                    | Reaching, pulling, pushing, carrying, throwing , lifting                       | 41 |   | 4 |   | DASH (n=28), UEFI (n=2), MHQ(n=1), ASES(n=1), SST (n=1), SF36(n=8), ARAT(n=2), AMULA ( n=1) UNBtP ( n=1)                                                                                                                                                                                                                    |
|                    | Turning twisting, gripping and releasing with the arm                          | 33 |   | 6 | 1 | DASH (n=28), UEFI (n=2), MHQ (n=1),ARAT(n=2),SHAP(n= 2), JHFT (n=1), AMULA (n=1), UNBtP (n=1), Not clear (n=1), QuickDash (n=1)                                                                                                                                                                                             |
|                    | Fine hand movement include writing                                             | 32 |   | 7 |   | DASH (n=28), UEFI (n=2), MHQ (n=1),ARAT(n=2), SHAP(n=2), JHFT (n=1) Purdue Peg test (n=1),AMULA (n=1), UNBtP (n=1)                                                                                                                                                                                                          |
|                    | <b>Role Functioning</b>                                                        |    |   |   |   |                                                                                                                                                                                                                                                                                                                             |

## Supplementary file 7. Measurement instruments mapped to domains

|                                                                                     |    |   |   |  |                                                                                                                                                                                                                                                        |
|-------------------------------------------------------------------------------------|----|---|---|--|--------------------------------------------------------------------------------------------------------------------------------------------------------------------------------------------------------------------------------------------------------|
| Impact on return to work                                                            | 46 |   |   |  | DASH (n =28), UEFI (n=2),MHQ (n=1), ASES (n=1), SST (n=1), SF36 (n=8), TAPES (n=1), MPI (n=1)<br>No description PRO (n=1), Questionnaire no data ( n=1), QuickDash(n=1)                                                                                |
| Role function patient specific                                                      | 2  |   |   |  | PSFS(n=2)                                                                                                                                                                                                                                              |
| Carrying out daily routine, (including food preparation, housework, garden, plants) | 43 | 1 | 5 |  | DASH (n=28), UEFI (n=2), MHQ (n=1),TAPES(n=1) , BPI (n=4), UCLA (n=1), SHAP (n=2), Jebsen (n=1), ULM (n=1)<br>Questionnaire not defined (n=2),No description PRO (n=1)<br>Unclear CLinRO(n=1), AMULA (n=1), UNBtP (n=1), QuickDash(n=1), EQ5D 3L (n=1) |
| Maintaining personal hygiene                                                        | 41 |   | 2 |  | DASH (n=28), ASES (n=1), SST(n=1), SF36(n=8), MHQ(n=1)<br>AMULA (n=1), UNBtP (n=1), QuickDash(n=1), EQ5D 3L (n=1)                                                                                                                                      |
| Maintaining personal appearance                                                     | 3  |   | 1 |  | UEFI (n=2), ASES (n= 1), AMULA (n=1)                                                                                                                                                                                                                   |
| Dressing                                                                            | 33 |   | 2 |  | DASH (n =28), UEFI (n=2), MHQ (n=1),ASES (n= 1), SST (n=1), AMULA (n=1) SHAP(n=2)                                                                                                                                                                      |
| Transport needs                                                                     | 29 |   |   |  | DASH (n =27), UEFI (n=2),                                                                                                                                                                                                                              |
| Impact on recreational activities and sport                                         | 36 |   |   |  | DASH (n =28), UEFI (n=2), ASES (n= 1), TAPES(n=1), CONSTANT-MURLEY (n=2),Not described PRO (n=1), QuickDash(n=1)                                                                                                                                       |
| <b>Social functioning</b>                                                           |    |   |   |  |                                                                                                                                                                                                                                                        |
| Effect on relationship with family, friends, neighbours and groups                  | 43 |   |   |  | DASH (n =28), SF36 (n=8), TAPES (n=1), MHQ (n=1), QuickDash(n=1), BPI (n=4)                                                                                                                                                                            |
| Effect on intimate relationships                                                    | 28 |   |   |  | DASH (n =28)                                                                                                                                                                                                                                           |
| <b>Emotional Functioning</b>                                                        |    |   |   |  |                                                                                                                                                                                                                                                        |
| Emotional distress/ mood                                                            | 18 |   |   |  | SF36 (n=8), TAPES (n= 1),BPI(n=4), UWNS(n=1), Self-rated anxiety scale (n=1), Self-rated depression scale (n=1), MHQ (n=1), EQ5D 3L (n=1)                                                                                                              |
| Thoughts and beliefs ( acceptance and adjustment)                                   | 1  |   |   |  | TAPES (n=1)                                                                                                                                                                                                                                            |
| Self-esteem and self confidence                                                     | 29 |   |   |  | DASH (n=28), TAPES(n= 1)                                                                                                                                                                                                                               |
| Body image                                                                          | 3  |   |   |  | MHQ (n= 2), Not described (n=1)                                                                                                                                                                                                                        |
| <b>Sleep and overall health</b>                                                     |    |   |   |  |                                                                                                                                                                                                                                                        |

## Supplementary file 7. Measurement instruments mapped to domains

|                         |                                                     |     |     |    |                                        |                                                                                                                                                                 |
|-------------------------|-----------------------------------------------------|-----|-----|----|----------------------------------------|-----------------------------------------------------------------------------------------------------------------------------------------------------------------|
|                         | Impact on sleep                                     | 41  |     |    |                                        | DASH (n=28), UEFI (n=3), ASES(n= 1), MHQ (n=1), SST (n=1), BPI(n=4), CONSTANT- MURLEY(n=2),Not described PRO (n=1)                                              |
|                         | <b>General Quality of life</b>                      | 1   |     |    |                                        | Not described PRO (n=1)                                                                                                                                         |
|                         | <b>Perceived Health Status</b>                      | 10  |     |    |                                        | SF36 (n=8), TAPES (n=1), Eq5D 3L (n=1)                                                                                                                          |
|                         | <b>Delivery of Care</b>                             |     |     |    |                                        |                                                                                                                                                                 |
|                         | Patient satisfaction                                | 10  |     |    |                                        | TAPES (n=1), UCLA (n=1), MHQ (n=1),10-point scale (n=1) 4 point scale (n=2), 3 point likert scale (n=1), Questionnaire not described (n=1),Not defined PRO(n=2) |
|                         | Patient preference for treatment                    | 1   |     |    |                                        | Not described (n=1)                                                                                                                                             |
|                         | Accessibility, quality and adequacy of intervention |     |     |    | 1                                      | 4 point scale (n=1)                                                                                                                                             |
| <b>RESOURCE</b>         | <b>Hospital</b>                                     |     |     |    |                                        |                                                                                                                                                                 |
|                         | Operation time                                      |     |     |    | 1                                      | Not described (n=1)                                                                                                                                             |
|                         | <b>Adverse Events</b>                               |     |     |    |                                        |                                                                                                                                                                 |
| <b>ADVERSE EVENTS</b>   | Donor site motor morbidity to include weakness      |     | 18  |    | 19                                     | BMRC (n=7), BMRC modified(n=2), Dynanometry (n=8), EMG(n=1),Not clear (n=19)                                                                                    |
|                         | Donor site sensory morbidity                        | 1   | 3   |    | 4                                      | 10-point scale PRO (n=1),Not defined (n=4),2PD (n=2), Monofilaments (n=1)                                                                                       |
|                         | Donor site morbidity -pain                          | 3   |     |    |                                        | Not defined PRO (n=3)                                                                                                                                           |
|                         | General complications                               |     |     |    | 3                                      | Unclear (n=3)                                                                                                                                                   |
|                         | Respiratory complications                           | 1   | 5   |    | 4                                      | 4 point scale PRO (n=1), x-ray (n=2), FEV (n=1), TLC(n=1), MVV (n=1), Not defined (n=4),                                                                        |
|                         | Vascular complications                              |     | 2   |    | 13                                     | Not defined (n=13), Visual assessment (n=1), USS (n=1)                                                                                                          |
|                         | Musculoskeletal complications                       |     | 2   |    | 19                                     | Not defined CLinRO(n=2), Unclear (n=19)                                                                                                                         |
| Infection complications |                                                     | 1   |     | 2  | Not defined ClinRo(n=1), Unclear (n=2) |                                                                                                                                                                 |
|                         |                                                     | 757 | 370 | 52 | 169                                    |                                                                                                                                                                 |

**Supplementary file 7. Measurement instruments mapped to domains**

1  
2  
3 *DASH* Disabilities of the arm shoulder and hand, *UEFI* Upper Extremity Functional Index, *MHQ* Michigan Hand Questionnaire, *BMRC* British Medical Research Council, *ULM* Upper Limb  
4 Module, *SHAP* Southampton Hand Assessment Procedure, *SST* Simple Shoulder Test, *MPI* Mayo clinic Performance Index for the elbow, *ARAT* Action Research Arm Test, *ClinRO* Clinician  
5 Reported Outcome, *Perfo* Performance Outcome, *PRO* Patient Reported Outcome, *ASES* American Shoulder and Elbow Surgeons Index, *TAPES* The Trinity Amputation and Prosthesis  
6 Experience Scales, *VAS* Visual Analogue Scale, *NRS* Numerical Rating Scale, *WBFRS* Wong Baker Faces Rating Scale, *UNWNS* University of Washington Neuropathic pain Score, *SF36* Short Form  
7 36 health survey, *NPSI* Neuropathic Pain Symptom Inventory, *BPI* Brief Pain Inventory, *PSFS* Pain Specific Functional Scale, *AMULA* American Measures for Upper Limb Amputees, *UNBPT*  
8 University of New Brunswick test of Prosthetics function, *JHFT* Jebsen Hand Function Test, *FEV* Forced Expiratory Volume, *TLC* Tidal Lung Capacity, *MVV* maximal voluntary ventilation, *USS*  
9 Ultrasound Scan.  
10  
11  
12  
13  
14  
15  
16  
17  
18  
19  
20  
21  
22  
23  
24  
25  
26  
27  
28  
29  
30  
31  
32  
33  
34  
35  
36  
37  
38  
39  
40  
41  
42  
43  
44  
45  
46

For peer review only

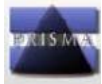

# PRISMA 2009 Checklist

1  
2  
3  
4  
5  
6  
7  
8  
9  
10  
11  
12  
13  
14  
15  
16  
17  
18  
19  
20  
21  
22  
23  
24  
25  
26  
27  
28  
29  
30  
31  
32  
33  
34  
35  
36  
37  
38  
39  
40  
41  
42  
43  
44  
45  
46  
47

| Section/topic                      | #  | Checklist item                                                                                                                                                                                                                                                                                              | Reported on page # |
|------------------------------------|----|-------------------------------------------------------------------------------------------------------------------------------------------------------------------------------------------------------------------------------------------------------------------------------------------------------------|--------------------|
| <b>TITLE</b>                       |    |                                                                                                                                                                                                                                                                                                             |                    |
| Title                              | 1  | Identify the report as a systematic review, meta-analysis, or both.                                                                                                                                                                                                                                         | 1                  |
| <b>ABSTRACT</b>                    |    |                                                                                                                                                                                                                                                                                                             |                    |
| Structured summary                 | 2  | Provide a structured summary including, as applicable: background; objectives; data sources; study eligibility criteria, participants, and interventions; study appraisal and synthesis methods; results; limitations; conclusions and implications of key findings; systematic review registration number. | 3                  |
| <b>INTRODUCTION</b>                |    |                                                                                                                                                                                                                                                                                                             |                    |
| Rationale                          | 3  | Describe the rationale for the review in the context of what is already known.                                                                                                                                                                                                                              | 5-6                |
| Objectives                         | 4  | Provide an explicit statement of questions being addressed with reference to participants, interventions, comparisons, outcomes, and study design (PICOS).                                                                                                                                                  | 7                  |
| <b>METHODS</b>                     |    |                                                                                                                                                                                                                                                                                                             |                    |
| Protocol and registration          | 5  | Indicate if a review protocol exists, if and where it can be accessed (e.g., Web address), and, if available, provide registration information including registration number.                                                                                                                               | 7                  |
| Eligibility criteria               | 6  | Specify study characteristics (e.g., PICOS, length of follow-up) and report characteristics (e.g., years considered, language, publication status) used as criteria for eligibility, giving rationale.                                                                                                      | 8                  |
| Information sources                | 7  | Describe all information sources (e.g., databases with dates of coverage, contact with study authors to identify additional studies) in the search and date last searched.                                                                                                                                  | 8                  |
| Search                             | 8  | Present full electronic search strategy for at least one database, including any limits used, such that it could be repeated.                                                                                                                                                                               | Supplementary 2    |
| Study selection                    | 9  | State the process for selecting studies (i.e., screening, eligibility, included in systematic review, and, if applicable, included in the meta-analysis).                                                                                                                                                   | 9                  |
| Data collection process            | 10 | Describe method of data extraction from reports (e.g., piloted forms, independently, in duplicate) and any processes for obtaining and confirming data from investigators.                                                                                                                                  | 9-10               |
| Data items                         | 11 | List and define all variables for which data were sought (e.g., PICOS, funding sources) and any assumptions and simplifications made.                                                                                                                                                                       | 9-10               |
| Risk of bias in individual studies | 12 | Describe methods used for assessing risk of bias of individual studies (including specification of whether this was done at the study or outcome level), and how this information is to be used in any data synthesis.                                                                                      | 9                  |
| Summary measures                   | 13 | State the principal summary measures (e.g., risk ratio, difference in means).                                                                                                                                                                                                                               | N/A                |
| Synthesis of results               | 14 | Describe the methods of handling data and combining results of studies, if done, including measures of consistency (e.g., $I^2$ ) for each meta-analysis.                                                                                                                                                   | 11                 |



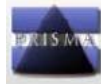

# PRISMA 2009 Checklist

Page 1 of 2

| Section/topic                 | #  | Checklist item                                                                                                                                                                                           | Reported on page # |
|-------------------------------|----|----------------------------------------------------------------------------------------------------------------------------------------------------------------------------------------------------------|--------------------|
| Risk of bias across studies   | 15 | Specify any assessment of risk of bias that may affect the cumulative evidence (e.g., publication bias, selective reporting within studies).                                                             | 9                  |
| Additional analyses           | 16 | Describe methods of additional analyses (e.g., sensitivity or subgroup analyses, meta-regression), if done, indicating which were pre-specified.                                                         | N/A                |
| <b>RESULTS</b>                |    |                                                                                                                                                                                                          |                    |
| Study selection               | 17 | Give numbers of studies screened, assessed for eligibility, and included in the review, with reasons for exclusions at each stage, ideally with a flow diagram.                                          | 13 ( Fig 1)        |
| Study characteristics         | 18 | For each study, present characteristics for which data were extracted (e.g., study size, PICOS, follow-up period) and provide the citations.                                                             | 14-16              |
| Risk of bias within studies   | 19 | Present data on risk of bias of each study and, if available, any outcome level assessment (see item 12).                                                                                                | n/a                |
| Results of individual studies | 20 | For all outcomes considered (benefits or harms), present, for each study: (a) simple summary data for each intervention group (b) effect estimates and confidence intervals, ideally with a forest plot. | n/a                |
| Synthesis of results          | 21 | Present results of each meta-analysis done, including confidence intervals and measures of consistency.                                                                                                  | n/a                |
| Risk of bias across studies   | 22 | Present results of any assessment of risk of bias across studies (see Item 15).                                                                                                                          | 23-24              |
| Additional analysis           | 23 | Give results of additional analyses, if done (e.g., sensitivity or subgroup analyses, meta-regression [see Item 16]).                                                                                    | n/a                |
| <b>DISCUSSION</b>             |    |                                                                                                                                                                                                          |                    |
| Summary of evidence           | 24 | Summarize the main findings including the strength of evidence for each main outcome; consider their relevance to key groups (e.g., healthcare providers, users, and policy makers).                     | 24-25              |
| Limitations                   | 25 | Discuss limitations at study and outcome level (e.g., risk of bias), and at review-level (e.g., incomplete retrieval of identified research, reporting bias).                                            | 26                 |
| Conclusions                   | 26 | Provide a general interpretation of the results in the context of other evidence, and implications for future research.                                                                                  | 27                 |
| <b>FUNDING</b>                |    |                                                                                                                                                                                                          |                    |
| Funding                       | 27 | Describe sources of funding for the systematic review and other support (e.g., supply of data); role of funders for the systematic review.                                                               | 30                 |

From: Moher D, Liberati A, Tetzlaff J, Altman DG, The PRISMA Group (2009). Preferred Reporting Items for Systematic Reviews and Meta-Analyses: The PRISMA Statement. PLoS Med 6(7): e1000097. doi:10.1371/journal.pmed1000097

For more information, visit: [www.prisma-statement.org](http://www.prisma-statement.org).
