# Supplementary material for: Developing a core outcome set for traumatic brachial plexus injuries: a systematic review of outcomes
Source: PubMed Central journal article supplement (PMC8327802; doi:10.1136/bmjopen-2020-044797), 2021-07-30
Supplement: bmjopen-2020-044797supp002.pdf [file bmjopen-2020-044797supp002.pdf]

Supplementary file 2. Search strategy systematic review outcome reporting traumatic brachial plexus injuries

Search strategy 10/09/2018 COMBINE systematic review (reran 07 May 2021)

MEDLINE (OVID)

- 1.(brachial plexus adj3 injur\*).mp. [mp=title, abstract, original title, name of substance word, subject heading word, floating sub-heading word, keyword heading word, protocol supplementary concept word, rare disease supplementary concept word, unique identifier, synonyms]
- 2 (brachial plexus adj3 pals\*).mp. [mp=title, abstract, original title, name of substance word, subject heading word, floating sub-heading word, keyword heading word, protocol supplementary concept word, rare disease supplementary concept word, unique identifier, synonyms]
- 3 (brachial plexus adj3 lesion\*).mp. [mp=title, abstract, original title, name of substance word, subject heading word, floating sub-heading word, keyword heading word, protocol supplementary concept word, rare disease supplementary concept word, unique identifier, synonyms]
- 4 brachial plexopath\*.mp. [mp=title, abstract, original title, name of substance word, subject heading word, floating sub-heading word, keyword heading word, protocol supplementary concept word, rare disease supplementary concept word, unique identifier, synonyms]
- 5 (brachial plexus adj3 traction\*).mp. [mp=title, abstract, original title, name of substance word, subject heading word, floating sub-heading word, keyword heading word, protocol supplementary concept word, rare disease supplementary concept word, unique identifier, synonyms]
- 6 (brachial plexus adj3 avulsion\*).mp. [mp=title, abstract, original title, name of substance word, subject heading word, floating sub-heading word, keyword heading word, protocol supplementary concept word, rare disease supplementary concept word, unique identifier, synonyms]
- 7 Brachial Plexus/in, su, tr [Injuries, Surgery, Transplantation]
- 8 1 or 2 or 3 or 4 or 5 or 6 or 7
- 9 limit 8 to (humans and "all adult (19 plus years)")
10. limit 9 to yr="2013 -Current

Supplementary file 2. Search strategy systematic review outcome reporting traumatic brachial plexus injuries
