# Supplementary material for: Developing a core outcome set for traumatic brachial plexus injuries: a systematic review of outcomes
Source: PubMed Central journal article supplement (PMC8327802; doi:10.1136/bmjopen-2020-044797), 2021-07-30
Supplement: bmjopen-2020-044797supp004.pdf [file bmjopen-2020-044797supp004.pdf]

## Supplementary File 4 COMET outcome taxonomy

**Title:** Supplemental File 4 COMET outcome taxonomy - adapted from Dodd et al (2018)

| <b>Core Area</b>              | <b>Outcome Domain</b>                                                                                |
|-------------------------------|------------------------------------------------------------------------------------------------------|
| <b>Death</b>                  | 1. Mortality/ survival                                                                               |
| <b>Physiological/clinical</b> | 2. Blood and lymphatic system outcomes                                                               |
|                               | 3. Cardiac outcomes                                                                                  |
|                               | 4. Congenital, familial and genetic outcomes                                                         |
|                               | 5. Endocrine outcomes                                                                                |
|                               | 6. Ear and labyrinth outcomes                                                                        |
|                               | 7. Eye outcomes                                                                                      |
|                               | 8. Gastrointestinal outcomes                                                                         |
|                               | 9. General outcomes                                                                                  |
|                               | 10. Hepatobiliary outcomes                                                                           |
|                               | 11. Immune system outcomes                                                                           |
|                               | 12. Infection and infestation outcomes                                                               |
|                               | 13. Injury and poisoning outcomes                                                                    |
|                               | 14. Metabolism and nutrition outcomes                                                                |
|                               | 15. Musculoskeletal and connective tissue outcomes                                                   |
|                               | 16. Outcomes, relating to neoplasms: benign, malignant and unspecified ( including cysts and polyps) |
|                               | 17. Nervous system outcomes                                                                          |
|                               | 18. Pregnancy, puerperium and perinatal outcomes                                                     |
|                               | 19. Renal and urinary outcomes                                                                       |
|                               | 20. Reproductive system and breast outcomes                                                          |
|                               | 21. Psychiatric outcomes                                                                             |
|                               | 22. Respiratory, thoracic and mediastinal outcomes                                                   |
|                               | 23. Skin and subcutaneous tissue outcomes                                                            |
|                               | 24. Vascular outcomes                                                                                |
| <b>Life Impact</b>            | <b>Functioning</b>                                                                                   |
|                               | 25. Physical functioning                                                                             |
|                               | 26. Social functioning                                                                               |
|                               | 27. Role functioning                                                                                 |
|                               | 28. Emotional functioning/ well being                                                                |
|                               | 29. Cognitive functioning                                                                            |
|                               | 30. Global quality of life                                                                           |
|                               | 31. Perceived health status                                                                          |
|                               | 32. Delivery of care                                                                                 |
|                               | 33. Personal circumstances                                                                           |
| <b>Resource use</b>           | <b>Resource Use</b>                                                                                  |
|                               | 34. Economic                                                                                         |
|                               | 35. Hospital                                                                                         |
|                               | 36. Need for further intervention                                                                    |
|                               | 37. Societal/ carer burden                                                                           |
| <b>Adverse Events</b>         | 38. Adverse Events / effects                                                                         |

Dodd S, Clarke M, Becker L et al. A taxonomy has been developed for outcomes in medical research to help improve knowledge discovery. *J Clin Epidemiol.* 2018;96:84-92.
