# Supplementary material for: Developing a core outcome set for traumatic brachial plexus injuries: a systematic review of outcomes
Source: HighWire-hosted journal article supplement (doi:10.1136/bmjopen-2020-044797), 2021-07-01
Supplement: bmjopen-2020-044797supp006_data_supplement.pdf [file bmjopen-2020-044797supp006_data_supplement.pdf]

**Supplementary file 6: Unique outcomes mapped to potential domains and core areas according to COMET****Online Supplementary file 4. Table: Unique outcomes mapped to potential domains and core areas according to COMET**(Dodd et al., 2018)

| Outcomes ( n=157)                  | Subdomains                    | Domains                                      | Core Areas             |
|------------------------------------|-------------------------------|----------------------------------------------|------------------------|
| Isometric muscle strength          | Muscle strength/ function     | Musculoskeletal and connective tissue domain | Physiological/Clinical |
| Concentric strength                |                               |                                              |                        |
| Eccentric strength                 |                               |                                              |                        |
| Muscle flicker/contraction         |                               |                                              |                        |
| Anti-gravity muscle activity       |                               |                                              |                        |
| Muscle endurance                   |                               |                                              |                        |
| Muscle fatigue                     |                               |                                              |                        |
| Muscle torque                      |                               |                                              |                        |
| Active range of movement           | Active movement               |                                              |                        |
| Perception of movement             |                               |                                              |                        |
| Antigravity movement               |                               |                                              |                        |
| Independent movement without donor |                               |                                              |                        |
| Passive range of movement          | Passive movement              |                                              |                        |
| Movement control/stability         | Control of movement/stability |                                              |                        |
| Muscle mass                        | Muscle mass                   |                                              |                        |
| Bony union                         | Bone structure/position       |                                              |                        |
| Joint position                     |                               |                                              |                        |
| Joint stability                    |                               |                                              |                        |
| General sensory recovery           | General sensory recovery      | Nervous system                               |                        |
| Feeling of numbness                |                               |                                              |                        |
| Proprioception                     |                               |                                              |                        |
| Light touch                        | Discriminative touch          |                                              |                        |
| 2 PD                               |                               |                                              |                        |

1

**Article title: Developing a core outcome set for Traumatic Brachial Plexus Injuries: a systematic review of outcomes**

**Supplementary file 6: Unique outcomes mapped to potential domains and core areas according to COMET**

|                                                 |                                         |                           |  |
|-------------------------------------------------|-----------------------------------------|---------------------------|--|
| Vibration                                       |                                         |                           |  |
| Object recognition                              |                                         |                           |  |
| Pain                                            | Protective touch                        |                           |  |
| Temperature                                     |                                         |                           |  |
| Deep pressure                                   |                                         |                           |  |
| Brachial plexus structure                       | Peripheral nervous system structure     |                           |  |
| Level of reinnervation                          | Reinnervation                           |                           |  |
| Time to reinnervation                           |                                         |                           |  |
| Progression of regeneration                     | Progression of regeneration             |                           |  |
| Speed of motor sensory conduction               | Speed of motor and sensory conduction   |                           |  |
| Pain intensity                                  | Pain intensity/relief                   | General outcomes/symptoms |  |
| Pain relief / reduction                         |                                         |                           |  |
| Pain duration                                   | Pain duration/frequency                 |                           |  |
| Pain frequency                                  |                                         |                           |  |
| Pain quality                                    | Pain quality and interference with life |                           |  |
| Pain interference with walking                  |                                         |                           |  |
| Pain interference in mood                       |                                         |                           |  |
| Pain interference with work                     |                                         |                           |  |
| Pain interference in activities of daily living |                                         |                           |  |
| Pain interference with relationships            |                                         |                           |  |
| Pain interference with enjoyment of life        |                                         |                           |  |
| Pain interference with sleep                    |                                         |                           |  |
| Sensitivity to cold                             | Pain when arm exposed to cold           |                           |  |
| Paraesthesia                                    | Paraesthesia and itchiness              |                           |  |
| Itchiness                                       |                                         |                           |  |

**Supplementary file 6: Unique outcomes mapped to potential domains and core areas according to COMET**

|                                      |                                                       |                  |  |                      |             |
|--------------------------------------|-------------------------------------------------------|------------------|--|----------------------|-------------|
| Sensitivity to pressure              | Sensitivity to touch, pressure etc                    |                  |  |                      |             |
| Sensitivity to touch                 |                                                       |                  |  |                      |             |
| Pain location                        | Location of pain                                      |                  |  |                      |             |
| Pain relief from medication          | Pain medication use                                   |                  |  |                      |             |
| Stiffness                            | Stiffness                                             |                  |  |                      |             |
| Impact on general sleep              | Impact on sleep                                       |                  |  |                      |             |
| Impact on sleep on affected side     |                                                       |                  |  |                      |             |
| Frequency sleep disturbed by injury  |                                                       |                  |  |                      |             |
| General physical function            | Physical function non-specific                        |                  |  | Physical functioning | Life Impact |
| Patient led functional outcome       |                                                       |                  |  |                      |             |
| Walking short distance               | Lower limb and non -upper limb function               |                  |  |                      |             |
| Balance                              |                                                       |                  |  |                      |             |
| Running                              |                                                       |                  |  |                      |             |
| Climbing stairs                      |                                                       |                  |  |                      |             |
| Bending                              |                                                       |                  |  |                      |             |
| Kneeling                             |                                                       |                  |  |                      |             |
| Reaching                             | Reaching, pulling, pushing, carrying etc              |                  |  |                      |             |
| Pulling                              |                                                       |                  |  |                      |             |
| Pushing                              |                                                       |                  |  |                      |             |
| Carrying                             |                                                       |                  |  |                      |             |
| Throwing                             |                                                       |                  |  |                      |             |
| Lifting                              |                                                       |                  |  |                      |             |
| General function of arm              | Turning twisting, gripping and releasing with the arm |                  |  |                      |             |
| Turning and twisting arm             |                                                       |                  |  |                      |             |
| Grip and release                     |                                                       |                  |  |                      |             |
| Pinching                             |                                                       |                  |  |                      |             |
| Fine hand movement (writing/buttons) | Fine hand movement including writing                  |                  |  |                      |             |
| Returning to work                    | Impact on paid or unpaid work or role in education    | Role functioning |  |                      |             |
| Ability to do work                   |                                                       |                  |  |                      |             |
| Usual time at work                   |                                                       |                  |  |                      |             |
| Type of work                         |                                                       |                  |  |                      |             |

**Supplementary file 6: Unique outcomes mapped to potential domains and core areas according to COMET**

|                                                            |                                                                                     |                    |  |
|------------------------------------------------------------|-------------------------------------------------------------------------------------|--------------------|--|
| Usual school activities                                    |                                                                                     |                    |  |
| General rating to perform a patient specific activity      | Role function - patient specific                                                    |                    |  |
| Impact on ADL (general)                                    | Carrying out daily routine, (including food preparation, housework, garden, plants) |                    |  |
| Return to ADL (general)                                    |                                                                                     |                    |  |
| Impact on food preparation and feeding                     |                                                                                     |                    |  |
| Housework (washing, cleaning, ironing, folding, vacuuming) |                                                                                     |                    |  |
| Gardening (Includes indoor plants)                         |                                                                                     |                    |  |
| Using a phone                                              |                                                                                     |                    |  |
| Maintaining personal hygiene                               |                                                                                     |                    |  |
| Maintaining personal appearance (grooming hair)            | Maintaining personal hygiene                                                        |                    |  |
| Dressing                                                   | Maintaining personal appearance                                                     |                    |  |
| Transport needs (e.g driving)                              | Dressing                                                                            |                    |  |
| Impact on normal hobbies                                   | Transport needs                                                                     |                    |  |
| Time doing normal hobbies                                  | Impact on recreational activities and sport                                         |                    |  |
| Playing instrument in usual way                            |                                                                                     |                    |  |
| Ability to play instrument                                 |                                                                                     |                    |  |
| Impact on time spent playing instrument                    |                                                                                     |                    |  |
| Impact on time spent doing sport                           |                                                                                     |                    |  |
| Impact on participation in sport                           |                                                                                     |                    |  |
| Social activities with friends                             | Effect on relationship with                                                         | Social functioning |  |

**Supplementary file 6: Unique outcomes mapped to potential domains and core areas according to COMET**

|                                              |                                        |                        |                  |
|----------------------------------------------|----------------------------------------|------------------------|------------------|
| Social activities with neighbours            | family, friends, neighbours and groups |                        |                  |
| Social activities with family                |                                        |                        |                  |
| Social activities with groups                |                                        |                        |                  |
| Dependence on family and friends             |                                        |                        |                  |
| Appearance interferes with social activities |                                        |                        |                  |
| Intimate relationships                       | Effect on intimate relationships       | Emotional functioning  |                  |
| Emotional impact on work                     | Emotional distress/mood                |                        |                  |
| Energy levels                                |                                        |                        |                  |
| Emotional impact on ADL                      |                                        |                        |                  |
| Happiness                                    |                                        |                        |                  |
| Impact on life enjoyment / satisfaction      |                                        |                        |                  |
| Emotional impact on relationships            |                                        |                        |                  |
| Anxiety                                      |                                        |                        |                  |
| Depression                                   |                                        |                        |                  |
| Acceptance/ Adjustment                       |                                        |                        |                  |
| Coping with trauma                           |                                        |                        |                  |
| Confidence                                   | Self esteem and confidence             |                        |                  |
| Self esteem                                  |                                        |                        |                  |
| Body image                                   | Body image                             |                        |                  |
| Quality of life                              | Quality of Life                        | Global Quality of Life | Quality of Life  |
| Rating of health                             | Perceived Health status                | Health status          | Health status    |
| General patient satisfaction                 | Patient satisfaction                   | Delivery of Care       | Delivery of Care |
| Satisfaction with appearance of arm          |                                        |                        |                  |
| Satisfaction with function                   |                                        |                        |                  |
| Satisfaction with movement                   |                                        |                        |                  |
| Satisfaction with strength                   |                                        |                        |                  |

**Supplementary file 6: Unique outcomes mapped to potential domains and core areas according to COMET**

|                              |                                                     |                |                |
|------------------------------|-----------------------------------------------------|----------------|----------------|
| Satisfaction with pain       |                                                     |                |                |
| Satisfaction with colour     |                                                     |                |                |
| Satisfaction with shape      |                                                     |                |                |
| Satisfaction with feeling    |                                                     |                |                |
| Satisfaction with procedure  |                                                     |                |                |
| Patient preference           | Patient preference                                  |                |                |
| Quality of intervention      | Accessibility, quality and adequacy of intervention |                |                |
| Time to surgery              | Time to surgery                                     |                |                |
| Operation time               | Operation time                                      | Resource Use   | Resource Use   |
| Motor morbidity              | Donor site morbidity                                | Adverse Events | Adverse Events |
| Sensory morbidity            |                                                     |                |                |
| Pain                         |                                                     |                |                |
| General complications        | General complications                               |                |                |
| Pneumothorax                 | Respiratory complications                           |                |                |
| Respiratory function         |                                                     |                |                |
| Respiratory symptoms         |                                                     |                |                |
| Pneumonia                    |                                                     |                |                |
| Arterial thrombosis          | Vascular complications                              |                |                |
| Venous thrombosis            |                                                     |                |                |
| Haematoma                    |                                                     |                |                |
| Venous spasm                 |                                                     |                |                |
| Iatrogenic vascular injury   |                                                     |                |                |
| Vascularity of flap          |                                                     |                |                |
| Swelling                     |                                                     |                |                |
| Fracture                     | Musculoskeletal complications                       |                |                |
| Passive range of motion loss |                                                     |                |                |
| Co-contraction               |                                                     |                |                |
| Bowstringing                 |                                                     |                |                |
| Failure of tendon attachment |                                                     |                |                |
| Joint Instability            |                                                     |                |                |
| Scapula crepitus             |                                                     |                |                |

6

**Article title: Developing a core outcome set for Traumatic Brachial Plexus Injuries: a systematic review of outcomes**

**Supplementary file 6: Unique outcomes mapped to potential domains and core areas according to COMET**

|                         |                         |  |  |
|-------------------------|-------------------------|--|--|
| Infection complications | Infection complications |  |  |
|-------------------------|-------------------------|--|--|

Dodd, S. et al. A taxonomy has been developed for outcomes in medical research to help improve knowledge discovery. *Journal of clinical epidemiology*. 2018, 96: 84–92.
