# Supplementary material for: Developing a core outcome set for traumatic brachial plexus injuries: a systematic review of outcomes
Source: BMJ Open. 2021 Jul 30;11(7):e044797. doi: 10.1136/bmjopen-2020-044797 (PMC8327802; doi:10.1136/bmjopen-2020-044797)
Supplement: Supplementary data [file bmjopen-2020-044797supp003.pdf]

Supplementary file 3. Outcome reporting bias assessment instrument

Outcome Reporting Bias assessment instrument (adapted from Deshmukh et al 2021)

| Study ID | Author | Registered | No clear reporting of outcome through description/table/figure | Outcome only by summary comment ( e.g. there was no significant difference), no numerical values provided, lack of information so that reporting not meaningful ( outcomes but no timepoints) | Outcome reported but not at all timepoints; lacks detail to be included in review | Outcome reported at all time points ( methods, Results) | Outcome not specified in registration or prior to results |
|----------|--------|------------|----------------------------------------------------------------|-----------------------------------------------------------------------------------------------------------------------------------------------------------------------------------------------|-----------------------------------------------------------------------------------|---------------------------------------------------------|-----------------------------------------------------------|
|          |        |            | NOT DONE                                                       | MIMIMAL                                                                                                                                                                                       | PARTIAL                                                                           | COMPLETE                                                | UNEXPECTED                                                |
|          |        |            |                                                                |                                                                                                                                                                                               |                                                                                   |                                                         |                                                           |
|          |        |            |                                                                |                                                                                                                                                                                               |                                                                                   |                                                         |                                                           |
|          |        |            |                                                                |                                                                                                                                                                                               |                                                                                   |                                                         |                                                           |
|          |        |            |                                                                |                                                                                                                                                                                               |                                                                                   |                                                         |                                                           |
|          |        |            |                                                                |                                                                                                                                                                                               |                                                                                   |                                                         |                                                           |
|          |        |            |                                                                |                                                                                                                                                                                               |                                                                                   |                                                         |                                                           |
|          |        |            |                                                                |                                                                                                                                                                                               |                                                                                   |                                                         |                                                           |
|          |        |            |                                                                |                                                                                                                                                                                               |                                                                                   |                                                         |                                                           |
|          |        |            |                                                                |                                                                                                                                                                                               |                                                                                   |                                                         |                                                           |
|          |        |            |                                                                |                                                                                                                                                                                               |                                                                                   |                                                         |                                                           |
|          |        |            |                                                                |                                                                                                                                                                                               |                                                                                   |                                                         |                                                           |
|          |        |            |                                                                |                                                                                                                                                                                               |                                                                                   |                                                         |                                                           |
|          |        |            |                                                                |                                                                                                                                                                                               |                                                                                   |                                                         |                                                           |
|          |        |            |                                                                |                                                                                                                                                                                               |                                                                                   |                                                         |                                                           |

Deshmukh SR, Mousoulis C, Marson BA et al. Developing a core outcome set for hand fractures and joint injuries in adults: a systematic review. Journal of Hand Surgery (Eur) 2021;46(5):488-495
